# Supplementary material for: AUXIN RESPONSE FACTOR 2 Intersects Hormonal Signals in the Regulation of Tomato Fruit Ripening
Source: PLoS Genet. 2016 Mar 9;12(3):e1005903. doi: 10.1371/journal.pgen.1005903 (PMC4784954; doi:10.1371/journal.pgen.1005903)
Supplement: S4 Table — (XLSX) [file pgen.1005903.s014.xlsx]

## Sheet: S4 Dataset
S4 Table. Differentially expressed genes in ARF2-OX transgenic fruit from microarray analysis.
probeset ID	ARF2sm-42G vs wt-42G	ARF2sm-42R vs wt-42G	wt-53R vs wt-42G	Fold-Change(overexpressor * 42dpa * green * ARF2sm-42G vs. WT * 42dpa * green * wt-42G) (Description)	Fold-Change(overexpressor * 42dpa * red * ARF2sm-42R vs. WT * 42dpa * green * wt-42G) (Description)	Fold-Change(WT * 53dpa * red * wt-53R vs. WT * 42dpa * green * wt-42G) (Description)	Pattern	01_ITAG 2.3 Genes_description	02_AIG code	03_AIG_description	04_Tomato_mRNA	05_chromosome	06_start	07_stop	08_3 prime nearest marker	09_3 prime cM	10_3 prime position	11_5 prime nearest marker	12_5 prime cM	13_5 prime position	14_BP_GODESCRIPTION	15_BP_GOTERM	16_CL_GODESCRIPTION	17_CL_GOTERM	18_MF_GODESCRIPTION	19_MF_GOTERM	20_Lycocyc_enzyme	21_Lycocyc pathway	Probeset ID	p-value(overexpressor * 42dpa * green * ARF2sm-42G vs. WT * 42dpa * green * wt-42G)	Ratio(overexpressor * 42dpa * green * ARF2sm-42G vs. WT * 42dpa * green * wt-42G)	Fold-Change(overexpressor * 42dpa * green * ARF2sm-42G vs. WT * 42dpa * green * wt-42G)	Fold-Change(overexpressor * 42dpa * green * ARF2sm-42G vs. WT * 42dpa * green * wt-42G) (Description)	p-value(overexpressor * 42dpa * red * ARF2sm-42R vs. WT * 42dpa * green * wt-42G)	Ratio(overexpressor * 42dpa * red * ARF2sm-42R vs. WT * 42dpa * green * wt-42G)	Fold-Change(overexpressor * 42dpa * red * ARF2sm-42R vs. WT * 42dpa * green * wt-42G)	Fold-Change(overexpressor * 42dpa * red * ARF2sm-42R vs. WT * 42dpa * green * wt-42G) (Description)	p-value(WT * 53dpa * red * wt-53R vs. WT * 42dpa * green * wt-42G)	Ratio(WT * 53dpa * red * wt-53R vs. WT * 42dpa * green * wt-42G)	Fold-Change(WT * 53dpa * red * wt-53R vs. WT * 42dpa * green * wt-42G)	Fold-Change(WT * 53dpa * red * wt-53R vs. WT * 42dpa * green * wt-42G) (Description)
Solyc01g006370.2	ARF2sm-42Gvswt-42G diff			ARF2sm-42G down vs wt-42G			ARF2sm-42G down vs wt-42G	Glucan synthase like 3 (AHRD V1 ***- D8R8I5_SELML)%3B contains Interpro domain(s) IPR0	at5g13000.1	| symbols: atgsl12 gsl12 | glucan synthase-like 12 | chr5:4110445-4121202 reverse leng	Solyc01g006370.2.1	SL2.40ch01	983795	1005620	TES0566	13.55	1022152	TGS2126	11.368	882629	\N	\N	\N	\N	transferase activity, transferring glycosyl groups	GO:0016757	NA	glucan synthase-like 12	Solyc01g006370.2	0.00101054	0.436632	-2.29026	ARF2sm-42G down vs wt-42G	0	0	0		0	0	0
Solyc01g006450.2	ARF2sm-42Gvswt-42G diff			ARF2sm-42G down vs wt-42G			ARF2sm-42G down vs wt-42G	Enoyl reductase (AHRD V1 ***- P93062_BRANA)%3B contains Interpro domain(s) IPR014358	at2g05990.2	| symbols: mod1 enr1 | nad(p)-binding rossmann-fold superfamily protein | chr2:2322876	Solyc01g006450.2.1	SL2.40ch01	1058119	1063305	tme0059	22.585	1226840	CT197	13.993	1036748	metabolic process oxidation-reduction process	GO:0008152 GO:0055114	\N	\N	\N	\N	actinorhodin biosynthesis	Enoyl reductase	Solyc01g006450.2	0.000150562	0.413683	-2.41731	ARF2sm-42G down vs wt-42G	0	0	0		0	0	0
Solyc01g059880.2	ARF2sm-42Gvswt-42G diff			ARF2sm-42G down vs wt-42G			ARF2sm-42G down vs wt-42G	ATP citrate lyase a-subunit (AHRD V1 **** Q93YH4_LUPAL)%3B contains Interpro domain(s)	at5g49460.1	| symbols: aclb-2 | atp citrate lyase subunit b 2 | chr5:20055048-20058195 forward leng	Solyc01g059880.2.1	SL2.40ch01	61770639	61776611	TEI0461	34.831	63870286	TGS0454	35.061	60475068	\N	\N	\N	\N	protein binding ATP citrate synthase activity	GO:0005515 GO:0003878	acetyl-CoA biosynthesis (from citrate)	Probable ATP-citrate synthase	Solyc01g059880.2	0.00108172	0.474509	-2.10744	ARF2sm-42G down vs wt-42G	0	0	0		0	0	0
Solyc01g096040.2	ARF2sm-42Gvswt-42G diff			ARF2sm-42G down vs wt-42G			ARF2sm-42G down vs wt-42G	Aspartic proteinase nepenthesin I (AHRD V1 **-- A9ZMF9_NEPAL)%3B contains Interpro doma	at1g01300.1	| symbols: | eukaryotic aspartyl protease family protein | chr1:117065-118522 forward l	Solyc01g096040.2.1	SL2.40ch01	78888446	78890253	TES1414	90.247	79320515	TGS2162	83.85	78788109	proteolysis	GO:0006508	\N	\N	\N	\N	NA	Eukaryotic aspartyl protease family protein	Solyc01g096040.2	0.000283641	0.3792	-2.63713	ARF2sm-42G down vs wt-42G	0	0	0		0	0	0
Solyc01g100030.2	ARF2sm-42Gvswt-42G diff			ARF2sm-42G down vs wt-42G			ARF2sm-42G down vs wt-42G	Deoxyuridine 5%26apos-triphosphate nucleotidohydrolase (AHRD V1 ***- D0NVQ2_PHYIN)%3B c	at3g46940.1	| symbols: dut1 | dutp-pyrophosphatase-like 1 | chr3:17288367-17288867 reverse length=1	Solyc01g100030.2.1	SL2.40ch01	81869800	81871185	TES1886	110.542	82279335	TEI0125	107.717	81714716	dUTP metabolic process	GO:0046080	\N	\N	\N	\N	NA	dUTP diphosphatase	Solyc01g100030.2	0.0016155	0.470167	-2.12691	ARF2sm-42G down vs wt-42G	0	0	0		0	0	0
Solyc01g109590.2	ARF2sm-42Gvswt-42G diff			ARF2sm-42G down vs wt-42G			ARF2sm-42G down vs wt-42G	Receptor-like protein kinase (AHRD V1 ***- Q9LYS5_ARATH)%3B contains Interpro domain(s)	at4g34500.1	| symbols: | protein kinase superfamily protein | chr4:16488005-16490792 reverse length	Solyc01g109590.2.1	SL2.40ch01	88251015	88255222	TEI0866	149.457	88530109	T1782	145.117	88188046	protein phosphorylation	GO:0006468	\N	\N	\N	\N	NA	Receptor-like protein kinase	Solyc01g109590.2	0.00117959	0.387504	-2.58062	ARF2sm-42G down vs wt-42G	0	0	0		0	0	0
Solyc01g112140.2	ARF2sm-42Gvswt-42G diff			ARF2sm-42G down vs wt-42G			ARF2sm-42G down vs wt-42G	Dimethylaniline monooxygenase 5 (AHRD V1 **** B5X0U9_SALSA)%3B contains Interpro domain	at1g19250.1	| symbols: fmo1 | flavin-dependent monooxygenase 1 | chr1:6650656-6653053 reverse lengt	Solyc01g112140.2.1	SL2.40ch01	89987101	89989597	TG27	153.709	90002951	TGS2443	151.78	89695024	\N	\N	\N	\N	monooxygenase activity	GO:0004497	NA	Probable flavin-containing monooxygenase 1	Solyc01g112140.2	0.00278308	0.468175	-2.13596	ARF2sm-42G down vs wt-42G	0	0	0		0	0	0
Solyc02g061760.2	ARF2sm-42Gvswt-42G diff			ARF2sm-42G down vs wt-42G			ARF2sm-42G down vs wt-42G	Mate efflux family protein (AHRD V1 **-- D7LLI9_ARALY)%3B contains Interpro domain(s)	at4g38380.1	| symbols: | mate efflux family protein | chr4:17971855-17974787 reverse length=560	Solyc02g061760.2.1	SL2.40ch02	27854434	27861277	TES0332	12.045	28751988	tma0121	4.723	27429541	\N	\N	membrane	GO:0016020	\N	\N	#N/A	#N/A	Solyc02g061760.2	0.00163078	0.370186	-2.70134	ARF2sm-42G down vs wt-42G	0	0	0		0	0	0
Solyc02g080810.2	ARF2sm-42Gvswt-42G diff			ARF2sm-42G down vs wt-42G			ARF2sm-42G down vs wt-42G	Aminomethyltransferase (AHRD V1 ***- C6TF02_SOYBN)%3B contains Interpro domain(s) IPR0	at1g11860.3	| symbols: | glycine cleavage t-protein family | chr1:4001801-4003245 forward length=40	Solyc02g080810.2.1	SL2.40ch02	39515754	39519204	TEI0071	85.407	39665865	TES1276	82.993	39415367	\N	\N	\N	\N	protein binding glycine dehydrogenase (decarboxylating) activity lipoic acid binding	GO:0005515 GO:0004375 GO:0031405	glycine cleavage complex	aminomethyltransferase	Solyc02g080810.2	0.00117263	0.428116	-2.33582	ARF2sm-42G down vs wt-42G	0	0	0		0	0	0
Solyc03g063040.2	ARF2sm-42Gvswt-42G diff			ARF2sm-42G down vs wt-42G			ARF2sm-42G down vs wt-42G	Amino acid transporter (AHRD V1 ***- B9HLH9_POPTR)%3B contains Interpro domain(s) IPR0													\N	\N	\N	\N	\N	\N	#N/A	#N/A	Solyc03g063040.2	0.00187594	0.367	-2.7248	ARF2sm-42G down vs wt-42G	0	0	0		0	0	0
Solyc03g114500.2	ARF2sm-42Gvswt-42G diff			ARF2sm-42G down vs wt-42G			ARF2sm-42G down vs wt-42G	Enolase (AHRD V1 ***- A9P745_HELAN)%3B contains Interpro domain(s) IPR000941 Enolase	at1g74030.1	| symbols: eno1 | enolase 1 | chr1:27839465-27841901 reverse length=477	Solyc03g114500.2.1	SL2.40ch03	58538109	58542525	TES0461	80.931	58613251	T781	82.281	58518571	\N	\N	\N	\N	phosphopyruvate hydratase activity	GO:0004634	gluconeogenesis	phosphopyruvate hydratase	Solyc03g114500.2	0.0012762	0.360574	-2.77335	ARF2sm-42G down vs wt-42G	0	0	0		0	0	0
Solyc03g120310.2	ARF2sm-42Gvswt-42G diff			ARF2sm-42G down vs wt-42G			ARF2sm-42G down vs wt-42G	Glycosyl transferase group 1 family protein (AHRD V1 *-*- A1ZR60_9BACT)%3B contains Int	at3g15940.2	| symbols: | udp-glycosyltransferase superfamily protein | chr3:5393632-5396187 reverse	Solyc03g120310.2.1	SL2.40ch03	62797197	62801828	cLET-5-F17	117.006	62912589	TES1026	112.666	62538280	biosynthetic process	GO:0009058	\N	\N	\N	\N	#N/A	#N/A	Solyc03g120310.2	0.000477207	0.420298	-2.37926	ARF2sm-42G down vs wt-42G	0	0	0		0	0	0
Solyc03g123720.2	ARF2sm-42Gvswt-42G diff			ARF2sm-42G down vs wt-42G			ARF2sm-42G down vs wt-42G	Protein-O-fucosyltransferase-like protein (AHRD V1 ***- D8RI05_SELML) Protein-O-fucosyl	at5g50420.1	| symbols: | o-fucosyltransferase family protein | chr5:20530453-20532635 reverse lengt	Solyc03g123720.2.1	SL2.40ch03	64518419	64521786	C2_At5g49830	133.514	64610911	tme0062	131.964	64427061	\N	\N	\N	\N	\N	\N	NA	GDP-fucose protein-O-fucosyltransferase 2	Solyc03g123720.2	0.000887183	0.461393	-2.16735	ARF2sm-42G down vs wt-42G	0	0	0		0	0	0
Solyc04g050700.1	ARF2sm-42Gvswt-42G diff			ARF2sm-42G down vs wt-42G			ARF2sm-42G down vs wt-42G	Unknown Protein (AHRD V1)%3B contains Interpro domain(s) IPR001910 Inosine/uridine-pr	at5g18870.1	| symbols: | inosine-uridine preferring nucleoside hydrolase family protein | chr5:6298	Solyc04g050700.1.1	SL2.40ch04	47175818	47176506	TES0484	37.201	47207477	TGS1518	37.382	46956529	\N	\N	\N	\N	\N	\N	purine degradation I (aerobic)	purine nucleoside hydrolase	Solyc04g050700.1	0.000102916	0.446893	-2.23767	ARF2sm-42G down vs wt-42G	0	0	0		0	0	0
Solyc05g011890.1	ARF2sm-42Gvswt-42G diff			ARF2sm-42G down vs wt-42G			ARF2sm-42G down vs wt-42G	Sulfotransferase family protein (AHRD V1 **** D7LQL2_ARALY)%3B contains Interpro domain	at2g03760.1	| symbols: st atst1 rar047 st1 atsot1 atsot12 sot12 | sulphotransferase 12 | chr2	Solyc05g011890.1.1	SL2.40ch05	5114556	5115566	TES1230	69.729	5228052	TGS1499	63.975	4990974	\N	\N	\N	\N	brassinosteroid sulfotransferase activity	GO:0080118	#N/A	#N/A	Solyc05g011890.1	1.96623e-05	0.444529	-2.24957	ARF2sm-42G down vs wt-42G	0	0	0		0	0	0
Solyc06g084260.2	ARF2sm-42Gvswt-42G diff			ARF2sm-42G down vs wt-42G			ARF2sm-42G down vs wt-42G	Chalcone isomerase (AHRD V1 ***- B6TFR7_MAIZE)%3B contains Interpro domain(s) IPR00346	at3g63170.1	| symbols: | chalcone-flavanone isomerase family protein | chr3:23334675-23335993 forwa	Solyc06g084260.2.1	SL2.40ch06	45747996	45753145	TES0213	107.468	45960727	TGS1802	107.521	45728464	cellular modified amino acid biosynthetic process	GO:0042398	\N	\N	\N	\N	flavonoid biosynthesis	Chalcone isomerase	Solyc06g084260.2	0.00204092	0.439719	-2.27418	ARF2sm-42G down vs wt-42G	0	0	0		0	0	0
Solyc08g082170.2	ARF2sm-42Gvswt-42G diff			ARF2sm-42G down vs wt-42G			ARF2sm-42G down vs wt-42G	Glycoside hydrolase family 28 protein/polygalacturonase family protein (AHRD V1 **-- Q1	at4g23820.1	| symbols: | pectin lyase-like superfamily protein | chr4:12397217-12400050 reverse len	Solyc08g082170.2.1	SL2.40ch08	62196569	62202288	TES1918	102.088	62241915	T1433	102.581	62105225	carbohydrate metabolic process	GO:0005975	\N	\N	\N	\N	homogalacturonan degradation	Probable polygalacturonase	Solyc08g082170.2	0.00233064	0.349081	-2.86466	ARF2sm-42G down vs wt-42G	0	0	0		0	0	0
Solyc09g010970.2	ARF2sm-42Gvswt-42G diff			ARF2sm-42G down vs wt-42G			ARF2sm-42G down vs wt-42G	Carbonic anhydrase (AHRD V1 ***- B9S9I2_RICCO)%3B contains Interpro domain(s) IPR00176	at4g33580.1	| symbols: atbca5 bca5 | beta carbonic anhydrase 5 | chr4:16139406-16141363 forward le	Solyc09g010970.2.1	SL2.40ch09	4321597	4325542	cTOB1K3	44.801	4382607	TES1157	42.509	4028414	\N	\N	\N	\N	protein binding	GO:0005515	cyanate degradation	carbonate dehydratase	Solyc09g010970.2	0.00203363	0.457871	-2.18402	ARF2sm-42G down vs wt-42G	0	0	0		0	0	0
Solyc09g018790.2	ARF2sm-42Gvswt-42G diff			ARF2sm-42G down vs wt-42G			ARF2sm-42G down vs wt-42G	Gamma hydroxybutyrate dehydrogenase-like protein (AHRD V1 **** Q84VC8_ORYSJ)%3B contain	at3g25530.1	| symbols: ghbdh atghbdh glyr1 gr1 | glyoxylate reductase 1 | chr3:9271949-9273514 r	Solyc09g018790.2.1	SL2.40ch09	17001628	17004264	TES0148	50.246	17885310	TGS1359	50.073	16964740	\N	\N	\N	\N	3-hydroxybutyrate dehydrogenase activity	GO:0003858	NA	3-hydroxybutyrate dehydrogenase	Solyc09g018790.2	0.00056703	0.467602	-2.13857	ARF2sm-42G down vs wt-42G	0	0	0		0	0	0
Solyc09g092130.2	ARF2sm-42Gvswt-42G diff			ARF2sm-42G down vs wt-42G			ARF2sm-42G down vs wt-42G	Sucrose phosphate synthase (AHRD V1 ***- D6R6Y5_9LILI)%3B contains Interpro domain(s)	at1g04920.1	| symbols: atsps3f sps3f | sucrose phosphate synthase 3f | chr1:1391674-1395756 revers	Solyc09g092130.2.1	SL2.40ch09	66617015	66625125	TES0322	104.73	66690588	TES0544	99.088	66560400	sucrose metabolic process biosynthetic process	GO:0005985 GO:0009058	\N	\N	\N	\N	sucrose biosynthesis	Sucrose phosphate synthase	Solyc09g092130.2	0.00152994	0.361055	-2.76966	ARF2sm-42G down vs wt-42G	0	0	0		0	0	0
Solyc10g008160.2	ARF2sm-42Gvswt-42G diff			ARF2sm-42G down vs wt-42G			ARF2sm-42G down vs wt-42G	Transcription factor (Fragment) (AHRD V1 *--- D6MK15_9ASPA)	at5g44190.1	| symbols: glk2 atglk2 gpri2 | golden2-like 2 | chr5:17798435-17800647 forward length	Solyc10g008160.2.1	SL2.40ch10	2293088	2295945	TG395	6.083	2313209	T1391	19.366	1947905	\N	\N	\N	\N	\N	\N	#N/A	#N/A	Solyc10g008160.2	0.000539075	0.16661	-6.00203	ARF2sm-42G down vs wt-42G	0	0	0		0	0	0
Solyc10g054660.1	ARF2sm-42Gvswt-42G diff			ARF2sm-42G down vs wt-42G			ARF2sm-42G down vs wt-42G	Unknown Protein (AHRD V1)	none	none	Solyc10g054660.1.1	SL2.40ch10	51182183	51185452	TGS0938	32.709	51259732	TES0393	31.632	49924064	\N	\N	\N	\N	\N	\N	#N/A	#N/A	Solyc10g054660.1	2.39241e-05	0.478787	-2.08861	ARF2sm-42G down vs wt-42G	0	0	0		0	0	0
Solyc11g007690.1	ARF2sm-42Gvswt-42G diff			ARF2sm-42G down vs wt-42G			ARF2sm-42G down vs wt-42G	Pyruvate kinase (AHRD V1 **** A9P7U5_POPTR)%3B contains Interpro domain(s) IPR001697	at3g52990.1	| symbols: | pyruvate kinase family protein | chr3:19649046-19652237 forward length=527	Solyc11g007690.1.1	SL2.40ch11	1924222	1933766	TES1229	22.173	1980770	SSR136	25.599	1866103	\N	\N	\N	\N	pyruvate kinase activity	GO:0004743	glycolysis IV (plant cytosol)	pyruvate kinase	Solyc11g007690.1	0.000129947	0.449576	-2.22432	ARF2sm-42G down vs wt-42G	0	0	0		0	0	0
Solyc11g069270.1	ARF2sm-42Gvswt-42G diff			ARF2sm-42G down vs wt-42G			ARF2sm-42G down vs wt-42G	Beta-galactosidase (AHRD V1 ***- Q9LLT0_SOLLC)%3B contains Interpro domain(s) IPR00194	at2g28470.2	| symbols: bgal8 | beta-galactosidase 8 | chr2:12169047-12173146 reverse length=846 | s	Solyc11g069270.1.1	SL2.40ch11	50983703	50990234	TEI0795	100.869	51392453	TEI0069	94.553	50836209	carbohydrate metabolic process	GO:0005975	\N	\N	sugar binding	GO:0005529	lactose degradation III	Beta-galactosidase	Solyc11g069270.1	6.78658e-05	0.267077	-3.74424	ARF2sm-42G down vs wt-42G	0	0	0		0	0	0
Solyc11g071820.1	ARF2sm-42Gvswt-42G diff			ARF2sm-42G down vs wt-42G			ARF2sm-42G down vs wt-42G	Receptor-like kinase (AHRD V1 ***- A7VM68_9VIRI)%3B contains Interpro domain(s) IPR001	at5g22050.2	| symbols: | protein kinase superfamily protein | chr5:7301467-7303209 forward length=3	Solyc11g071820.1.1	SL2.40ch11	52259863	52264687	TGS1262	104.769	52271477	TGS0830	110.222	52253128	protein phosphorylation	GO:0006468	\N	\N	\N	\N	NA	Receptor-like kinase	Solyc11g071820.1	0.00171549	0.496811	-2.01284	ARF2sm-42G down vs wt-42G	0	0	0		0	0	0
Solyc12g009820.1	ARF2sm-42Gvswt-42G diff			ARF2sm-42G down vs wt-42G			ARF2sm-42G down vs wt-42G	Processive diacylglycerol glucosyltransferase (AHRD V1 **-- C5NXP9_9BACL)%3B contains I	at5g20410.1	| symbols: mgd2 atmgd2 | monogalactosyldiacylglycerol synthase 2 | chr5:6896765-689858	Solyc12g009820.1.1	SL2.40ch12	3016425	3020241	TEI0111	41.225	3147453	CT211	39.512	2922428	lipid glycosylation glycolipid biosynthetic process	GO:0030259 GO:0009247	\N	\N	\N	\N	glycolipid biosynthesis	UDP-galactose:DAG galactosyltransferase	Solyc12g009820.1	0.00292488	0.290443	-3.44301	ARF2sm-42G down vs wt-42G	0	0	0		0	0	0
Solyc01g008020.2	ARF2sm-42Gvswt-42G diff	ARF2sm-42R vs wt-42G diff		ARF2sm-42G up vs wt-42G	ARF2sm-42R down vs wt-42G		ARF2sm-42G up /ARF2sm-42R down vs wt-42G	Equilibrative nucleoside transporter 1 (AHRD V1 **** Q4W6L4_ORYSJ)%3B contains Interpro	at1g70330.1	| symbols: ent1 at ent1 | equilibrative nucleotide transporter 1 | chr1:26502920-26504	Solyc01g008020.2.1	SL2.40ch01	2185118	2189315	TEI0013	23.645	2249798	TES0233	24.101	2119835	\N	\N	\N	\N	nucleoside transmembrane transporter activity, against a concentration gradient	GO:0010174	#N/A	#N/A	Solyc01g008020.2	0.0015578	3.85158	3.85158	ARF2sm-42G up vs wt-42G	0.00857545	0.40387	-2.47604	ARF2sm-42R down vs wt-42G	0	0	0
Solyc10g078570.1	ARF2sm-42Gvswt-42G diff	ARF2sm-42R vs wt-42G diff		ARF2sm-42G up vs wt-42G	ARF2sm-42R down vs wt-42G		ARF2sm-42G up /ARF2sm-42R down vs wt-42G	Genomic DNA chromosome 5 P1 clone MKN22 (AHRD V1 ***- Q9LVC2_ARATH)	at1g55365.1	| symbols: | unknown protein functions in: molecular_function unknown involved in: bi	Solyc10g078570.1.1	SL2.40ch10	59681484	59681768	T246	44.525	59723570	TGS2241	43.774	59493877	\N	\N	\N	\N	\N	\N	#N/A	#N/A	Solyc10g078570.1	0.00014512	3.42107	3.42107	ARF2sm-42G up vs wt-42G	0.00076112	0.420498	-2.37813	ARF2sm-42R down vs wt-42G	0	0	0
Solyc02g078380.2	ARF2sm-42Gvswt-42G diff	ARF2sm-42R vs wt-42G diff	wt-53R vs wt-42G diff	ARF2sm-42G up vs wt-42G	ARF2sm-42R down vs wt-42G	wt-53R down vs wt-42G	ARF2sm-42G up/ARF2sm-42R&wt-53R down vs wt-42G	Aluminum-induced protein-like protein (AHRD V1 **-- Q8S2R9_THEHA)	at4g27450.1	| symbols: | aluminium induced protein with ygl and lrdr motifs | chr4:13727665-1372868	Solyc02g078380.2.1	SL2.40ch02	37662239	37663693	TES0234	70.814	37684727	C2_At4g21710	69.774	37590092	\N	\N	\N	\N	\N	\N	#N/A	#N/A	Solyc02g078380.2	0.000733627	5.72438	5.72438	ARF2sm-42G up vs wt-42G	0.000320756	0.124756	-8.01562	ARF2sm-42R down vs wt-42G	0.00110709	0.158437	-6.31167	wt-53R down vs wt-42G
Solyc02g089250.2	ARF2sm-42Gvswt-42G diff	ARF2sm-42R vs wt-42G diff	wt-53R vs wt-42G diff	ARF2sm-42G up vs wt-42G	ARF2sm-42R down vs wt-42G	wt-53R down vs wt-42G	ARF2sm-42G up/ARF2sm-42R&wt-53R down vs wt-42G	Pollen Ole e 1 allergen and extensin (AHRD V1 *-*- Q2HSE9_MEDTR)%3B contains Interpro d	at5g15780.1	| symbols: | pollen ole e 1 allergen and extensin family protein | chr5:5144898-5146297	Solyc02g089250.2.1	SL2.40ch02	45695219	45697076	TG34	123.149	45731452	TES0513	134.663	45680466	\N	\N	\N	\N	\N	\N	#N/A	#N/A	Solyc02g089250.2	0.000737248	3.71211	3.71211	ARF2sm-42G up vs wt-42G	0.000498687	0.240186	-4.16343	ARF2sm-42R down vs wt-42G	0.000923303	0.236342	-4.23115	wt-53R down vs wt-42G
Solyc03g119200.2	ARF2sm-42Gvswt-42G diff	ARF2sm-42R vs wt-42G diff	wt-53R vs wt-42G diff	ARF2sm-42G up vs wt-42G	ARF2sm-42R down vs wt-42G	wt-53R down vs wt-42G	ARF2sm-42G up/ARF2sm-42R&wt-53R down vs wt-42G	Mandelate racemase/muconate lactonizing enzyme family protein (AHRD V1 **** A9GEI3_SORC	at3g18270.1	| symbols: cyp77a5p | cytochrome p450 family 77 subfamily a polypeptide 5 pseudogene	Solyc03g119200.2.1	SL2.40ch03	61916311	61921325	TES1874	108.37	61945007	TES1935	108.669	61681169	\N	\N	\N	\N	mandelate racemase activity racemase and epimerase activity, acting on amino acids and	GO:0018838 GO:0016855	NA	mandelate racemase	Solyc03g119200.2	0.00118581	2.61144	2.61144	ARF2sm-42G up vs wt-42G	0.00112132	0.378427	-2.64252	ARF2sm-42R down vs wt-42G	0.00156357	0.352461	-2.8372	wt-53R down vs wt-42G
Solyc02g071120.2	ARF2sm-42Gvswt-42G diff	ARF2sm-42R vs wt-42G diff		ARF2sm-42G down vs wt-42G	ARF2sm-42R down vs wt-42G		ARF2sm-42G&R down vs wt-42G	CAS1 domain containing 1 (AHRD V1 **-- B0W8N6_CULQU)%3B contains Interpro domain(s) IP	at2g34410.2	| symbols: | o-acetyltransferase family protein | chr2:14518719-14522053 forward length	Solyc02g071120.2.1	SL2.40ch02	35176956	35184955	cLEC27M9	53.773	35325464	TEI0517	49.407	34976192	\N	\N	\N	\N	O-acetyltransferase activity	GO:0016413	#N/A	#N/A	Solyc02g071120.2	0.000528759	0.450409	-2.2202	ARF2sm-42G down vs wt-42G	0.00077988	0.480128	-2.08278	ARF2sm-42R down vs wt-42G	0	0	0
Solyc03g005770.1	ARF2sm-42Gvswt-42G diff	ARF2sm-42R vs wt-42G diff		ARF2sm-42G down vs wt-42G	ARF2sm-42R down vs wt-42G		ARF2sm-42G&R down vs wt-42G	Chlorophyll a-b binding protein 3C-like (AHRD V1 **** Q2XTE0_SOLTU)%3B contains Interpr	at1g29930.1	| symbols: cab1 ab140 cab140 lhcb1.3 | chlorophyll a/b binding protein 1 | chr1:1047	Solyc03g005770.1.1	SL2.40ch03	540995	541798	TES0894	15.745	924708	TES1207	7.149	493439	\N	\N	\N	\N	protein binding chlorophyll binding	GO:0005515 GO:0016168	#N/A	#N/A	Solyc03g005770.1	0.000810463	0.340477	-2.93705	ARF2sm-42G down vs wt-42G	0.00036833	0.279314	-3.5802	ARF2sm-42R down vs wt-42G	0	0	0
Solyc03g098020.2	ARF2sm-42Gvswt-42G diff	ARF2sm-42R vs wt-42G diff		ARF2sm-42G down vs wt-42G	ARF2sm-42R down vs wt-42G		ARF2sm-42G&R down vs wt-42G	Hydrolase alpha/beta fold family protein (AHRD V1 **-- D7KRI7_ARALY)%3B contains Interp	at1g73480.1	| symbols: | alpha/beta-hydrolases superfamily protein | chr1:27629266-27632486 forward	Solyc03g098020.2.1	SL2.40ch03	53815621	53822753	tme0012	61.415	53901781	TES1660	67.217	53768483	\N	\N	\N	\N	lysophospholipase activity	GO:0004622	NA	hydrolase	Solyc03g098020.2	0.000529558	0.3991	-2.50564	ARF2sm-42G down vs wt-42G	6.74477e-05	0.243289	-4.11033	ARF2sm-42R down vs wt-42G	0	0	0
Solyc04g011400.2	ARF2sm-42Gvswt-42G diff	ARF2sm-42R vs wt-42G diff		ARF2sm-42G down vs wt-42G	ARF2sm-42R down vs wt-42G		ARF2sm-42G&R down vs wt-42G	UDP-glucose 4-epimerase (AHRD V1 **-* D5RML8_9PROT)%3B contains Interpro domain(s) IPR	at2g28760.3	| symbols: uxs6 | udp-xyl synthase 6 | chr2:12336469-12338642 reverse length=343	Solyc04g011400.2.1	SL2.40ch04	3868800	3872796	TES0294	22.828	3883250	TGS2046	21.844	3620713	\N	\N	\N	\N	UDP-glucuronate decarboxylase activity	GO:0048040	UDP-D-xylose biosynthesis	catalytic	Solyc04g011400.2	0.00108556	0.498976	-2.00411	ARF2sm-42G down vs wt-42G	0.00078746	0.474523	-2.10738	ARF2sm-42R down vs wt-42G	0	0	0
Solyc05g007130.2	ARF2sm-42Gvswt-42G diff	ARF2sm-42R vs wt-42G diff		ARF2sm-42G down vs wt-42G	ARF2sm-42R down vs wt-42G		ARF2sm-42G&R down vs wt-42G	Calmodulin binding protein (AHRD V1 **-* B6T984_MAIZE)%3B contains Interpro domain(s)	at1g14380.2	| symbols: iqd28 | iq-domain 28 | chr1:4918279-4920761 reverse length=602	Solyc05g007130.2.1	SL2.40ch05	1694652	1699497	TES0261	19.681	1798292	T1592	17.003	1653185	\N	\N	\N	\N	calmodulin binding	GO:0005516	#N/A	#N/A	Solyc05g007130.2	0.00321414	0.457027	-2.18806	ARF2sm-42G down vs wt-42G	0.00393092	0.473611	-2.11144	ARF2sm-42R down vs wt-42G	0	0	0
Solyc05g008780.2	ARF2sm-42Gvswt-42G diff	ARF2sm-42R vs wt-42G diff		ARF2sm-42G down vs wt-42G	ARF2sm-42R down vs wt-42G		ARF2sm-42G&R down vs wt-42G	Proton pump interactor 1 (AHRD V1 *--- D5L6G0_SOLTU)	at1g20970.1	| symbols: | functions in: molecular_function unknown involved in: biological_process	Solyc05g008780.2.1	SL2.40ch05	3003423	3014261	TES0534	43.407	3198272	TGS1360	41.343	2990999	\N	\N	\N	\N	\N	\N	#N/A	#N/A	Solyc05g008780.2	0.000831229	0.402708	-2.48319	ARF2sm-42G down vs wt-42G	0.00143163	0.445934	-2.24248	ARF2sm-42R down vs wt-42G	0	0	0
Solyc05g021180.1	ARF2sm-42Gvswt-42G diff	ARF2sm-42R vs wt-42G diff		ARF2sm-42G down vs wt-42G	ARF2sm-42R down vs wt-42G		ARF2sm-42G&R down vs wt-42G	Unknown Protein (AHRD V1)	none	none	Solyc05g021180.1.1	SL2.40ch05	26607991	26610450	TGS0874	81.405	27169326	TGS0633	82.838	24524021	\N	\N	\N	\N	\N	\N	#N/A	#N/A	Solyc05g021180.1	3.81415e-05	0.200047	-4.99882	ARF2sm-42G down vs wt-42G	4.85838e-05	0.216237	-4.62456	ARF2sm-42R down vs wt-42G	0	0	0
Solyc06g008500.2	ARF2sm-42Gvswt-42G diff	ARF2sm-42R vs wt-42G diff		ARF2sm-42G down vs wt-42G	ARF2sm-42R down vs wt-42G		ARF2sm-42G&R down vs wt-42G	Ankyrin repeat-containing protein (AHRD V1 *-*- D2Y4N3_TOBAC)%3B contains Interpro doma	at3g23280.2	| symbols: xbat35 | xb3 ortholog 5 in arabidopsis thaliana | chr3:8321588-8324109 forwa	Solyc06g008500.2.1	SL2.40ch06	2391924	2399431	TGS2204	10.052	2811372	TGS0149	7.122	2315043	\N	\N	\N	\N	zinc ion binding	GO:0008270	#N/A	#N/A	Solyc06g008500.2	0.000420975	0.459882	-2.17447	ARF2sm-42G down vs wt-42G	0.000177121	0.393766	-2.53958	ARF2sm-42R down vs wt-42G	0	0	0
Solyc08g079040.1	ARF2sm-42Gvswt-42G diff	ARF2sm-42R vs wt-42G diff		ARF2sm-42G down vs wt-42G	ARF2sm-42R down vs wt-42G		ARF2sm-42G&R down vs wt-42G	Galactosyltransferase-like protein (Fragment) (AHRD V1 **-- D8SQH4_SELML)%3B contains I	at4g22580.1	| symbols: | exostosin family protein | chr4:11889382-11890689 reverse length=435	Solyc08g079040.1.1	SL2.40ch08	59852908	59854221	tme0030	80.702	59881936	TES1757	81.022	59830174	\N	\N	\N	\N	catalytic activity	GO:0003824	#N/A	#N/A	Solyc08g079040.1	0.00265531	0.386042	-2.59039	ARF2sm-42G down vs wt-42G	0.00385564	0.417463	-2.39542	ARF2sm-42R down vs wt-42G	0	0	0
Solyc09g090670.2	ARF2sm-42Gvswt-42G diff	ARF2sm-42R vs wt-42G diff		ARF2sm-42G down vs wt-42G	ARF2sm-42R down vs wt-42G		ARF2sm-42G&R down vs wt-42G	Oxidation resistance 1-like protein (AHRD V1 *--- Q6Z157_ORYSJ)%3B contains Interpro do	at2g05590.2	| symbols: | tld-domain containing nucleolar protein | chr2:2067196-2068951 forward len	Solyc09g090670.2.1	SL2.40ch09	65469158	65473532	TES0562	92.726	65871729	TG424	83.701	65429631	\N	\N	\N	\N	\N	\N	#N/A	#N/A	Solyc09g090670.2	0.00149277	0.457508	-2.18575	ARF2sm-42G down vs wt-42G	0.001256	0.443826	-2.25314	ARF2sm-42R down vs wt-42G	0	0	0
Solyc10g009570.2	ARF2sm-42Gvswt-42G diff	ARF2sm-42R vs wt-42G diff		ARF2sm-42G down vs wt-42G	ARF2sm-42R down vs wt-42G		ARF2sm-42G&R down vs wt-42G	Rhodanese-related sulfurtransferase (AHRD V1 *--- A4U0Q7_9PROT)%3B contains Interpro do	at4g01050.1	| symbols: trol | thylakoid rhodanese-like | chr4:455874-458175 forward length=466	Solyc10g009570.2.1	SL2.40ch10	3694886	3699858	TG560	28.193	4402536	TES0720	27.5	3425326	\N	\N	\N	\N	protein binding	GO:0005515	#N/A	#N/A	Solyc10g009570.2	0.000743983	0.392031	-2.55082	ARF2sm-42G down vs wt-42G	0.000802937	0.398077	-2.51208	ARF2sm-42R down vs wt-42G	0	0	0
Solyc01g107990.2	ARF2sm-42Gvswt-42G diff		wt-53R vs wt-42G diff	ARF2sm-42G down vs wt-42G		wt-53R down vs wt-42G	ARF2sm-42G&wt-53R down vs wt-42G	MAPprotein kinase-like protein (AHRD V1 **-- Q9LT86_ARATH)%3B contains Interpro domain(	at1g49740.1	| symbols: | plc-like phosphodiesterases superfamily protein | chr1:18407728-18409468 f	Solyc01g107990.2.1	SL2.40ch01	87135966	87140638	TGS3285	138.597	87346925	TES0985	136.43	86940830	oxidation-reduction process lipid metabolic process	GO:0055114 GO:0006629	\N	\N	\N	\N	#N/A	#N/A	Solyc01g107990.2	0.00200488	0.443964	-2.25244	ARF2sm-42G down vs wt-42G	0	0	0		0.00294156	0.423313	-2.36232	wt-53R down vs wt-42G
Solyc02g076750.1	ARF2sm-42Gvswt-42G diff		wt-53R vs wt-42G diff	ARF2sm-42G down vs wt-42G		wt-53R down vs wt-42G	ARF2sm-42G&wt-53R down vs wt-42G	Cathepsin B-like cysteine proteinase (AHRD V1 **-* CYSP_SCHMA)%3B contains Interpro dom	at1g09850.1	| symbols: xbcp3 | xylem bark cysteine peptidase 3 | chr1:3201848-3203875 forward lengt	Solyc02g076750.1.1	SL2.40ch02	36434825	36437024	cLEW-17-M24	59.745	36443787	TGS0541	58.071	36234723	\N	\N	\N	\N	cysteine-type endopeptidase activity	GO:0004197	#N/A	#N/A	Solyc02g076750.1	0.000200615	0.335284	-2.98254	ARF2sm-42G down vs wt-42G	0	0	0		0.0014036	0.435198	-2.2978	wt-53R down vs wt-42G
Solyc02g077090.2	ARF2sm-42Gvswt-42G diff		wt-53R vs wt-42G diff	ARF2sm-42G down vs wt-42G		wt-53R down vs wt-42G	ARF2sm-42G&wt-53R down vs wt-42G	Chloroplast unusual positioning 1A (AHRD V1 *--- B3IYT7_ADICA)	at4g18570.1	| symbols: | tetratricopeptide repeat (tpr)-like superfamily protein | chr4:10231439-10	Solyc02g077090.2.1	SL2.40ch02	36718822	36723310	TEI0633	60.534	36819521	cLEW-17-M24	59.745	36443787	\N	\N	\N	\N	\N	\N	#N/A	#N/A	Solyc02g077090.2	0.00292774	0.416566	-2.40058	ARF2sm-42G down vs wt-42G	0	0	0		0.00606956	0.42635	-2.34549	wt-53R down vs wt-42G
Solyc03g063030.2	ARF2sm-42Gvswt-42G diff		wt-53R vs wt-42G diff	ARF2sm-42G down vs wt-42G		wt-53R down vs wt-42G	ARF2sm-42G&wt-53R down vs wt-42G	Amino acid transporter (AHRD V1 **** B9HLH9_POPTR)%3B contains Interpro domain(s) IPR0	at2g39130.1	| symbols: | transmembrane amino acid transporter family protein | chr2:16323171-163267	Solyc03g063030.2.1	SL2.40ch03	30409721	30412887	TGS2112	62.067	30442714	TES1504	60.174	29845443	\N	\N	\N	\N	amino acid transmembrane transporter activity	GO:0015171	#N/A	#N/A	Solyc03g063030.2	0.000170596	0.400168	-2.49895	ARF2sm-42G down vs wt-42G	0	0	0		0.000940264	0.47907	-2.08738	wt-53R down vs wt-42G
Solyc03g083960.2	ARF2sm-42Gvswt-42G diff		wt-53R vs wt-42G diff	ARF2sm-42G down vs wt-42G		wt-53R down vs wt-42G	ARF2sm-42G&wt-53R down vs wt-42G	Trehalose 6-phosphate phosphatase (AHRD V1 **** D4QAK5_TOBAC)%3B contains Interpro doma	at5g51460.2	| symbols: attppa | haloacid dehalogenase-like hydrolase (had) superfamily protein | ch	Solyc03g083960.2.1	SL2.40ch03	47442646	47445417	TES1461	63.089	47876472	TGS0958	58.853	47250391	\N	\N	\N	\N	trehalose-phosphatase activity	GO:0004805	NA	trehalose-phosphatase	Solyc03g083960.2	0.00180407	0.274866	-3.63813	ARF2sm-42G down vs wt-42G	0	0	0		0.00428192	0.294	-3.40136	wt-53R down vs wt-42G
Solyc03g095780.1	ARF2sm-42Gvswt-42G diff		wt-53R vs wt-42G diff	ARF2sm-42G down vs wt-42G		wt-53R down vs wt-42G	ARF2sm-42G&wt-53R down vs wt-42G	Abscisic acid receptor PYL6 (AHRD V1 **-* PYL6_ARATH)%3B contains Interpro domain(s) I	at2g38310.1	| symbols: pyl4 rcar10 | pyr1-like 4 | chr2:16050251-16050874 forward length=207 | sym	Solyc03g095780.1.1	SL2.40ch03	50483220	50483825	TES1222	59.997	51882257	TES0174	58.728	50421752	\N	\N	\N	\N	protein homodimerization activity receptor activity	GO:0042803 GO:0004872	#N/A	#N/A	Solyc03g095780.1	0.00204178	0.205772	-4.85974	ARF2sm-42G down vs wt-42G	0	0	0		0.00817082	0.267282	-3.74137	wt-53R down vs wt-42G
Solyc04g055250.2	ARF2sm-42Gvswt-42G diff		wt-53R vs wt-42G diff	ARF2sm-42G down vs wt-42G		wt-53R down vs wt-42G	ARF2sm-42G&wt-53R down vs wt-42G	Unknown Protein (AHRD V1)	at4g39900.1	| symbols: | unknown protein has 30201 blast hits to 17322 proteins in 780 species: ar	Solyc04g055250.2.1	SL2.40ch04	53024745	53031415	TES0476	46.697	53080729	TES0853	45.672	52752346	\N	\N	\N	\N	\N	\N	#N/A	#N/A	Solyc04g055250.2	0.00216565	0.447577	-2.23425	ARF2sm-42G down vs wt-42G	0	0	0		0.00102644	0.334481	-2.98971	wt-53R down vs wt-42G
Solyc08g080150.1	ARF2sm-42Gvswt-42G diff		wt-53R vs wt-42G diff	ARF2sm-42G down vs wt-42G		wt-53R down vs wt-42G	ARF2sm-42G&wt-53R down vs wt-42G	TCP family transcription factor (AHRD V1 *-** A6MCZ2_9ORYZ)%3B contains Interpro domain	at2g45680.1	| symbols: | tcp family transcription factor | chr2:18820717-18821787 reverse length=35	Solyc08g080150.1.1	SL2.40ch08	60651002	60652114	tme0075	86.423	60811687	tme0100	84.782	60616460	\N	\N	\N	\N	sequence-specific DNA binding transcription factor activity	GO:0003700	#N/A	#N/A	Solyc08g080150.1	9.7222e-05	0.486464	-2.05565	ARF2sm-42G down vs wt-42G	0	0	0		9.28746e-05	0.431722	-2.31631	wt-53R down vs wt-42G
Solyc08g082310.2	ARF2sm-42Gvswt-42G diff		wt-53R vs wt-42G diff	ARF2sm-42G down vs wt-42G		wt-53R down vs wt-42G	ARF2sm-42G&wt-53R down vs wt-42G	RING finger protein (AHRD V1 *-*- C6EUD3_SOYBN)%3B contains Interpro domain(s) IPR0189	at5g53110.1	| symbols: | ring/u-box superfamily protein | chr5:21529022-21533008 forward length=382	Solyc08g082310.2.1	SL2.40ch08	62306796	62311786	TES0537	103.133	62383473	TGS0810	103.799	62264213	\N	\N	\N	\N	zinc ion binding	GO:0008270	#N/A	#N/A	Solyc08g082310.2	0.000993034	0.376365	-2.657	ARF2sm-42G down vs wt-42G	0	0	0		0.00409045	0.440085	-2.27229	wt-53R down vs wt-42G
Solyc10g009080.2	ARF2sm-42Gvswt-42G diff		wt-53R vs wt-42G diff	ARF2sm-42G down vs wt-42G		wt-53R down vs wt-42G	ARF2sm-42G&wt-53R down vs wt-42G	Squamosa promoter binding-like protein (AHRD V1 ***- Q0PY35_SOLLC)%3B contains Interpro	at2g33810.1	| symbols: spl3 | squamosa promoter binding protein-like 3 | chr2:14305342-14305828 for	Solyc10g009080.2.1	SL2.40ch10	3108120	3110879	TGS1921	27.281	3285779	TES0440	22.625	3005580	\N	\N	nucleus	GO:0005634	\N	\N	#N/A	#N/A	Solyc10g009080.2	0.0026656	0.461287	-2.16785	ARF2sm-42G down vs wt-42G	0	0	0		0.00662144	0.485797	-2.05847	wt-53R down vs wt-42G
Solyc10g081720.1	ARF2sm-42Gvswt-42G diff		wt-53R vs wt-42G diff	ARF2sm-42G down vs wt-42G		wt-53R down vs wt-42G	ARF2sm-42G&wt-53R down vs wt-42G	Fasciclin-like arabinogalactan protein 14 (AHRD V1 ***- A9XTL9_GOSHI)%3B contains Inter	at5g06390.1	| symbols: fla17 | fasciclin-like arabinogalactan protein 17 precursor | chr5:1952939-1	Solyc10g081720.1.1	SL2.40ch10	62066241	62069437	TES0485	60.074	62182712	TEI0272	57.423	62015657	\N	\N	\N	\N	\N	\N	#N/A	#N/A	Solyc10g081720.1	0.000466809	0.346267	-2.88794	ARF2sm-42G down vs wt-42G	0	0	0		0.00544445	0.492726	-2.02953	wt-53R down vs wt-42G
Solyc11g007900.1	ARF2sm-42Gvswt-42G diff		wt-53R vs wt-42G diff	ARF2sm-42G down vs wt-42G		wt-53R down vs wt-42G	ARF2sm-42G&wt-53R down vs wt-42G	Os03g0107400 protein (Fragment) (AHRD V1 *--- Q0DVY2_ORYSJ)%3B contains Interpro domain	at1g63300.1	| symbols: | myosin heavy chain-related protein | chr1:23482193-23486067 forward length	Solyc11g007900.1.1	SL2.40ch11	2123346	2132562	TG651	30.728	2267199	TES1229	22.173	1980770	\N	\N	\N	\N	\N	\N	#N/A	#N/A	Solyc11g007900.1	0.0018221	0.320437	-3.12074	ARF2sm-42G down vs wt-42G	0	0	0		0.00755737	0.389142	-2.56976	wt-53R down vs wt-42G
Solyc11g008870.1	ARF2sm-42Gvswt-42G diff		wt-53R vs wt-42G diff	ARF2sm-42G down vs wt-42G		wt-53R down vs wt-42G	ARF2sm-42G&wt-53R down vs wt-42G	Methylenetetrahydrofolate reductase (AHRD V1 ***- A5ATB7_VITVI)%3B contains Interpro do	at2g44160.1	| symbols: mthfr2 | methylenetetrahydrofolate reductase 2 | chr2:18262301-18265185 forw	Solyc11g008870.1.1	SL2.40ch11	3044787	3049095	TGS2433	36.246	3143932	T1125	34.286	2821155	oxidation-reduction process	GO:0055114	\N	\N	\N	\N	folate transformations	Methylenetetrahydrofolate reductase	Solyc11g008870.1	0.000633708	0.400781	-2.49513	ARF2sm-42G down vs wt-42G	0	0	0		0.00232903	0.452448	-2.2102	wt-53R down vs wt-42G
Solyc12g005050.1	ARF2sm-42Gvswt-42G diff		wt-53R vs wt-42G diff	ARF2sm-42G down vs wt-42G		wt-53R down vs wt-42G	ARF2sm-42G&wt-53R down vs wt-42G	HAUS augmin-like complex subunit 4 (AHRD V1 *-*- HAUS4_HUMAN)	at1g50710.1	| symbols: | unknown protein has 109 blast hits to 109 proteins in 44 species: archae	Solyc12g005050.1.1	SL2.40ch12	22130	27629	TES1635	7.679	209686	\NA	\NA	\NA	\N	\N	\N	\N	\N	\N	#N/A	#N/A	Solyc12g005050.1	0.0011111	0.371607	-2.69101	ARF2sm-42G down vs wt-42G	0	0	0		0.00815777	0.48565	-2.0591	wt-53R down vs wt-42G
Solyc10g051030.1	ARF2sm-42Gvswt-42G diff	ARF2sm-42R vs wt-42G diff		ARF2sm-42G down vs wt-42G	ARF2sm-42R down vs wt-42G		ARF2sm-42G&R down vs wt-42G	Ternary complex factor MIP1 (AHRD V1 **-- B6UE27_MAIZE)%3B contains Interpro domain(s)	at5g66600.4	| symbols: | protein of unknown function duf547 | chr5:26575105-26578315 reverse lengt	Solyc10g051030.1.1	SL2.40ch10	46857362	46859735	TES0950	31.762	47515555	TEI0220	20.414	46854324	\N	\N	\N	\N	\N	\N	#N/A	#N/A	Solyc10g051030.1	0.000912486	0.477833	-2.09278	ARF2sm-42G down vs wt-42G	0.000781609	0.465944	-2.14618	ARF2sm-42R down vs wt-42G	0	0	0
Solyc10g078980.1	ARF2sm-42Gvswt-42G diff	ARF2sm-42R vs wt-42G diff		ARF2sm-42G down vs wt-42G	ARF2sm-42R down vs wt-42G		ARF2sm-42G&R down vs wt-42G	Unknown Protein (AHRD V1)	none	none	Solyc10g078980.1.1	SL2.40ch10	59946902	59947664	TES0555	47.259	60030947	TGS0579	44.42	59943998	\N	\N	\N	\N	\N	\N	#N/A	#N/A	Solyc10g078980.1	0.00311523	0.476107	-2.10037	ARF2sm-42G down vs wt-42G	0.000591794	0.342594	-2.91891	ARF2sm-42R down vs wt-42G	0	0	0
Solyc11g007250.1	ARF2sm-42Gvswt-42G diff	ARF2sm-42R vs wt-42G diff		ARF2sm-42G down vs wt-42G	ARF2sm-42R down vs wt-42G		ARF2sm-42G&R down vs wt-42G	Protein kinase like protein (AHRD V1 ***- Q0WN21_ARATH)%3B contains Interpro domain(s)	at3g44610.1	| symbols: | protein kinase superfamily protein | chr3:16188266-16192107 reverse length	Solyc11g007250.1.1	SL2.40ch11	1647832	1649734	TES1021	23.048	1739186	TES0426	17.201	1605402	protein phosphorylation	GO:0006468	\N	\N	\N	\N	NA	Protein kinase superfamily protein	Solyc11g007250.1	0.000142043	0.477195	-2.09558	ARF2sm-42G down vs wt-42G	0.000165002	0.488159	-2.04851	ARF2sm-42R down vs wt-42G	0	0	0
Solyc11g009020.1	ARF2sm-42Gvswt-42G diff	ARF2sm-42R vs wt-42G diff		ARF2sm-42G down vs wt-42G	ARF2sm-42R down vs wt-42G		ARF2sm-42G&R down vs wt-42G	HAD-superfamily hydrolase subfamily IA variant 3 containing protein expressed (AHRD V1	at4g39970.1	| symbols: | haloacid dehalogenase-like hydrolase (had) superfamily protein | chr4:1853	Solyc11g009020.1.1	SL2.40ch11	3160364	3163079	TGS2887	39.621	3195008	TGS2433	36.246	3143932	\N	\N	\N	\N	hydrolase activity protein binding	GO:0016787 GO:0005515	flavin biosynthesis	hydrolase	Solyc11g009020.1	0.00211253	0.351812	-2.84243	ARF2sm-42G down vs wt-42G	0.00153208	0.325523	-3.07198	ARF2sm-42R down vs wt-42G	0	0	0
Solyc12g100120.1	ARF2sm-42Gvswt-42G diff	ARF2sm-42R vs wt-42G diff		ARF2sm-42G down vs wt-42G	ARF2sm-42R down vs wt-42G		ARF2sm-42G&R down vs wt-42G	Acetyl-CoA carboxylase-like protein (AHRD V1 *-*- Q8ABH3_BACTN)%3B contains Interpro do	at5g12950.1	| symbols: | putative glycosyl hydrolase of unknown function (duf1680) | chr5:4093117-4	Solyc12g100120.1.1	SL2.40ch12	65308503	65313592	TGS0591	118.396	65390334	TES1724	116.7	64942078	\N	\N	\N	\N	\N	\N	#N/A	#N/A	Solyc12g100120.1	0.0023592	0.471683	-2.12007	ARF2sm-42G down vs wt-42G	0.000707703	0.375414	-2.66373	ARF2sm-42R down vs wt-42G	0	0	0
Solyc01g008800.1	ARF2sm-42Gvswt-42G diff	ARF2sm-42R vs wt-42G diff		ARF2sm-42G up vs wt-42G	ARF2sm-42R up vs wt-42G		ARF2sm-42G&R up vs wt-42G	Tir-nbs-lrr%2C resistance protein	at5g17680.1	| symbols: | disease resistance protein (tir-nbs-lrr class) putative | chr5:5822999-58	Solyc01g008800.1.1	SL2.40ch01	2831445	2836597	cLEC-4-E12	23.592	3174417	T1650	23.612	2657288	\N	\N	\N	\N	receptor activity	GO:0004872	#N/A	#N/A	Solyc01g008800.1	0.00145713	4.11144	4.11144	ARF2sm-42G up vs wt-42G	0.00171921	3.9072	3.9072	ARF2sm-42R up vs wt-42G	0	0	0
Solyc01g096930.2	ARF2sm-42Gvswt-42G diff	ARF2sm-42R vs wt-42G diff		ARF2sm-42G up vs wt-42G	ARF2sm-42R up vs wt-42G		ARF2sm-42G&R up vs wt-42G	Phospholipid-transporting ATPase (AHRD V1 **** B6JZB6_SCHJY)%3B contains Interpro domai	at5g04930.1	| symbols: ala1 | aminophospholipid atpase 1 | chr5:1445509-1449568 forward length=1158	Solyc01g096930.2.1	SL2.40ch01	79693945	79699772	TES1752	93.754	79958166	TES0687	90.794	79618494	\N	\N	\N	\N	phospholipid-translocating ATPase activity	GO:0004012	NA	aminophospholipid ATPase 1	Solyc01g096930.2	0.00176022	3.60065	3.60065	ARF2sm-42G up vs wt-42G	0.00542695	2.6885	2.6885	ARF2sm-42R up vs wt-42G	0	0	0
Solyc01g107560.2	ARF2sm-42Gvswt-42G diff	ARF2sm-42R vs wt-42G diff		ARF2sm-42G up vs wt-42G	ARF2sm-42R up vs wt-42G		ARF2sm-42G&R up vs wt-42G	UDP-glucosyltransferase 1 (AHRD V1 **** C6ZRH7_CAPAN)%3B contains Interpro domain(s) I	at4g15480.1	| symbols: ugt84a1 | udp-glycosyltransferase superfamily protein | chr4:8849000-8850472	Solyc01g107560.2.1	SL2.40ch01	86827224	86829017	TES0985	136.43	86940830	TGS2980	138.235	86588532	\N	\N	\N	\N	sinapate 1-glucosyltransferase activity	GO:0050284	cinnamate esters biosynthesis	UDP-glucose:glucosyltransferase	Solyc01g107560.2	0.00209414	3.70295	3.70295	ARF2sm-42G up vs wt-42G	0.00462508	2.97792	2.97792	ARF2sm-42R up vs wt-42G	0	0	0
Solyc02g082450.2	ARF2sm-42Gvswt-42G diff	ARF2sm-42R vs wt-42G diff		ARF2sm-42G up vs wt-42G	ARF2sm-42R up vs wt-42G		ARF2sm-42G&R up vs wt-42G	Auxin efflux carrier family protein (AHRD V1 **** D7L9F0_ARALY)%3B contains Interpro do	at2g17500.4	| symbols: | auxin efflux carrier family protein | chr2:7607063-7608990 forward length=	Solyc02g082450.2.1	SL2.40ch02	40726154	40728736	TES0195	87.731	40791685	SSR580	84.464	40624939	\N	\N	\N	\N	auxin:hydrogen symporter activity	GO:0009672	#N/A	#N/A	Solyc02g082450.2	0.00153865	7.04781	7.04781	ARF2sm-42G up vs wt-42G	0.00658473	4.04179	4.04179	ARF2sm-42R up vs wt-42G	0	0	0
Solyc02g085910.2	ARF2sm-42Gvswt-42G diff	ARF2sm-42R vs wt-42G diff		ARF2sm-42G up vs wt-42G	ARF2sm-42R up vs wt-42G		ARF2sm-42G&R up vs wt-42G	LOB domain protein 42 (AHRD V1 ***- D7KWD0_ARALY)%3B contains Interpro domain(s) IPR00	at3g02550.1	| symbols: lbd41 | lob domain-containing protein 41 | chr3:536747-537650 reverse length	Solyc02g085910.2.1	SL2.40ch02	43268986	43270169	U146494	99.531	43528761	TES1669	97.323	43214388	\N	\N	\N	\N	\N	\N	#N/A	#N/A	Solyc02g085910.2	0.00304587	14.4796	14.4796	ARF2sm-42G up vs wt-42G	0.0017359	20.7959	20.7959	ARF2sm-42R up vs wt-42G	0	0	0
Solyc02g086460.2	ARF2sm-42Gvswt-42G diff	ARF2sm-42R vs wt-42G diff		ARF2sm-42G up vs wt-42G	ARF2sm-42R up vs wt-42G		ARF2sm-42G&R up vs wt-42G	Unknown Protein (AHRD V1)	at5g40450.1	| symbols: | unknown protein functions in: molecular_function unknown involved in: bi	Solyc02g086460.2.1	SL2.40ch02	43702622	43720134	T628	101.55	44015230	U146494	99.531	43528761	\N	\N	\N	\N	\N	\N	#N/A	#N/A	Solyc02g086460.2	0.00111466	2.91096	2.91096	ARF2sm-42G up vs wt-42G	0.00111305	2.91194	2.91194	ARF2sm-42R up vs wt-42G	0	0	0
Solyc02g092110.2	ARF2sm-42Gvswt-42G diff	ARF2sm-42R vs wt-42G diff		ARF2sm-42G up vs wt-42G	ARF2sm-42R up vs wt-42G		ARF2sm-42G&R up vs wt-42G	Phytosulfokines 3 (AHRD V1 ***- PSK3_ARATH)%3B contains Interpro domain(s) IPR009438	at3g49780.1	| symbols: atpsk4 atpsk3 (former symbol) psk4 | phytosulfokine 4 precursor | chr3:184	Solyc02g092110.2.1	SL2.40ch02	47901342	47902019	TES1644	139.344	47968139	T1400	132.163	47153396	\N	\N	extracellular region	GO:0005576	\N	\N	#N/A	#N/A	Solyc02g092110.2	0.000293485	8.57919	8.57919	ARF2sm-42G up vs wt-42G	0.0080776	2.7828	2.7828	ARF2sm-42R up vs wt-42G	0	0	0
Solyc03g043860.2	ARF2sm-42Gvswt-42G diff	ARF2sm-42R vs wt-42G diff		ARF2sm-42G up vs wt-42G	ARF2sm-42R up vs wt-42G		ARF2sm-42G&R up vs wt-42G	Nudix hydrolase 1 (AtNUDT1) (NADH pyrophosphatase) (DHNTP pyrophosphohydrolase) (Dihydr	at1g68760.1	| symbols: atnudt1 atnudx1 nudx1 | nudix hydrolase 1 | chr1:25829090-25829607 forward	Solyc03g043860.2.1	SL2.40ch03	11492947	11494028	TGS2705	47.801	14174762	TGS0064	55.979	10987801	\N	\N	\N	\N	8-oxo-7,8-dihydroguanosine triphosphate pyrophosphatase activity dihydroneopterin triph	GO:0008413 GO:0019177	tetrahydrofolate biosynthesis II	dihydroneopterin triphosphate pyrophosphohydrolase	Solyc03g043860.2	1.79966e-05	3.61385	3.61385	ARF2sm-42G up vs wt-42G	0.000352094	2.00368	2.00368	ARF2sm-42R up vs wt-42G	0	0	0
Solyc03g043900.1	ARF2sm-42Gvswt-42G diff	ARF2sm-42R vs wt-42G diff		ARF2sm-42G up vs wt-42G	ARF2sm-42R up vs wt-42G		ARF2sm-42G&R up vs wt-42G	BZIP transcription factor family protein (AHRD V1 **-- D7LSY0_ARALY)%3B contains Interp	at4g37730.1	| symbols: atbzip7 bzip7 | basic leucine-zipper 7 | chr4:17723800-17724717 forward len	Solyc03g043900.1.1	SL2.40ch03	11578703	11579314	TGS2705	47.801	14174762	TGS0064	55.979	10987801	\N	\N	\N	\N	DNA binding	GO:0003677	#N/A	#N/A	Solyc03g043900.1	0.00262641	2.63162	2.63162	ARF2sm-42G up vs wt-42G	0.00263249	2.63029	2.63029	ARF2sm-42R up vs wt-42G	0	0	0
Solyc03g121940.2	ARF2sm-42Gvswt-42G diff	ARF2sm-42R vs wt-42G diff		ARF2sm-42G up vs wt-42G	ARF2sm-42R up vs wt-42G		ARF2sm-42G&R up vs wt-42G	Nuclear transcription factor Y subunit A-3 (AHRD V1 *-*- B6TQI5_MAIZE)%3B contains Inte	at1g72830.1	| symbols: hap2c athap2c nf-ya3 | nuclear factor y subunit a3 | chr1:27405699-274070	Solyc03g121940.2.1	SL2.40ch03	63991444	63996098	TG549	130.94	64123380	tme0045	130.459	63986079	\N	\N	nucleus	GO:0005634	\N	\N	#N/A	#N/A	Solyc03g121940.2	0.00226367	2.11841	2.11841	ARF2sm-42G up vs wt-42G	0.000287198	3.23756	3.23756	ARF2sm-42R up vs wt-42G	0	0	0
Solyc04g080540.2	ARF2sm-42Gvswt-42G diff	ARF2sm-42R vs wt-42G diff		ARF2sm-42G up vs wt-42G	ARF2sm-42R up vs wt-42G		ARF2sm-42G&R up vs wt-42G	ST225 (AHRD V1 ***- B4YYB7_THEHA)	at1g19530.1	| symbols: | unknown protein functions in: molecular_function unknown involved in: n-	Solyc04g080540.2.1	SL2.40ch04	62269475	62271018	TEI0380	114.564	62611200	TES1652	109.216	62219666	\N	\N	\N	\N	protein binding	GO:0005515	#N/A	#N/A	Solyc04g080540.2	0.00200371	11.5649	11.5649	ARF2sm-42G up vs wt-42G	0.00692964	6.26065	6.26065	ARF2sm-42R up vs wt-42G	0	0	0
Solyc07g040990.2	ARF2sm-42Gvswt-42G diff	ARF2sm-42R vs wt-42G diff		ARF2sm-42G up vs wt-42G	ARF2sm-42R up vs wt-42G		ARF2sm-42G&R up vs wt-42G	Protein phosphatase 2C (AHRD V1 ***- A5A6P8_WHEAT)%3B contains Interpro domain(s) IPR0	at5g57050.1	| symbols: abi2 atabi2 | protein phosphatase 2c family protein | chr5:23087720-2308930	Solyc07g040990.2.1	SL2.40ch07	48808707	48811933	TGS2841	27.061	49295356	CT135	26.661	48550476	\N	\N	\N	\N	protein binding	GO:0005515	NA	Protein phosphatase 2C	Solyc07g040990.2	0.000197943	2.00221	2.00221	ARF2sm-42G up vs wt-42G	0.000131811	2.12894	2.12894	ARF2sm-42R up vs wt-42G	0	0	0
Solyc07g045160.2	ARF2sm-42Gvswt-42G diff	ARF2sm-42R vs wt-42G diff		ARF2sm-42G up vs wt-42G	ARF2sm-42R up vs wt-42G		ARF2sm-42G&R up vs wt-42G	Phosphofructokinase family protein (AHRD V1 ***- D7MLU4_ARALY)%3B contains Interpro dom	at5g56630.1	| symbols: pfk7 | phosphofructokinase 7 | chr5:22924311-22926728 forward length=485	Solyc07g045160.2.1	SL2.40ch07	55581144	55585417	TGS2182	39.396	55635343	TES0986	48.813	55381608	glycolysis	GO:0006096	6-phosphofructokinase complex	GO:0005945	\N	\N	glycolysis IV (plant cytosol)	phosphofructokinase, putative	Solyc07g045160.2	0.00128751	2.78352	2.78352	ARF2sm-42G up vs wt-42G	0.00367929	2.2432	2.2432	ARF2sm-42R up vs wt-42G	0	0	0
Solyc07g054770.1	ARF2sm-42Gvswt-42G diff	ARF2sm-42R vs wt-42G diff		ARF2sm-42G up vs wt-42G	ARF2sm-42R up vs wt-42G		ARF2sm-42G&R up vs wt-42G	Wound induced protein (AHRD V1 ***- B6SKC8_MAIZE)	at4g10270.1	| symbols: | wound-responsive family protein | chr4:6374805-6375077 forward length=90	Solyc07g054770.1.1	SL2.40ch07	60305991	60306260	TEI0407	43.776	60644382	TGS0953	46.979	60279891	\N	\N	\N	\N	\N	\N	#N/A	#N/A	Solyc07g054770.1	0.00130523	4.04924	4.04924	ARF2sm-42G up vs wt-42G	0.00081985	4.70169	4.70169	ARF2sm-42R up vs wt-42G	0	0	0
Solyc07g054790.1	ARF2sm-42Gvswt-42G diff	ARF2sm-42R vs wt-42G diff		ARF2sm-42G up vs wt-42G	ARF2sm-42R up vs wt-42G		ARF2sm-42G&R up vs wt-42G	Wound induced protein (AHRD V1 ***- B6U0P9_MAIZE)	at4g10270.1	| symbols: | wound-responsive family protein | chr4:6374805-6375077 forward length=90	Solyc07g054790.1.1	SL2.40ch07	60309380	60309652	TEI0407	43.776	60644382	TGS0953	46.979	60279891	\N	\N	\N	\N	\N	\N	#N/A	#N/A	Solyc07g054790.1	0.00215981	19.5033	19.5033	ARF2sm-42G up vs wt-42G	0.00318421	15.1736	15.1736	ARF2sm-42R up vs wt-42G	0	0	0
Solyc08g006970.2	ARF2sm-42Gvswt-42G diff	ARF2sm-42R vs wt-42G diff		ARF2sm-42G up vs wt-42G	ARF2sm-42R up vs wt-42G		ARF2sm-42G&R up vs wt-42G	Lrr%2C resistance protein fragment Lrr%2C resistance protein fragment Lrr%2C resista	at4g35470.1	| symbols: pirl4 | plant intracellular ras group-related lrr 4 | chr4:16846531-16848448	Solyc08g006970.2.1	SL2.40ch08	1548922	1552302	TG176	2.904	1913353	tme0016	2.621	1112253	\N	\N	\N	\N	protein phosphatase binding protein C-terminus binding	GO:0019903 GO:0008022	#N/A	#N/A	Solyc08g006970.2	2.75997e-05	2.07848	2.07848	ARF2sm-42G up vs wt-42G	1.70206e-05	2.24191	2.24191	ARF2sm-42R up vs wt-42G	0	0	0
Solyc08g007080.2	ARF2sm-42Gvswt-42G diff	ARF2sm-42R vs wt-42G diff		ARF2sm-42G up vs wt-42G	ARF2sm-42R up vs wt-42G		ARF2sm-42G&R up vs wt-42G	Inositol 1 4 5-trisphosphate 5-phosphatase (AHRD V1 **** Q712G2_ARATH)%3B contains Inte	at4g18010.1	| symbols: ip5pii at5ptase2 5ptase2 | myo-inositol polyphosphate 5-phosphatase 2 | ch	Solyc08g007080.2.1	SL2.40ch08	1637048	1641994	TG176	2.904	1913353	tme0016	2.621	1112253	\N	\N	\N	\N	inositol-polyphosphate 5-phosphatase activity	GO:0004445	NA	myo-inositol polyphosphate 5-phosphatase 2	Solyc08g007080.2	0.0010798	2.26523	2.26523	ARF2sm-42G up vs wt-42G	0.00171337	2.09282	2.09282	ARF2sm-42R up vs wt-42G	0	0	0
Solyc10g083580.1	ARF2sm-42Gvswt-42G diff	ARF2sm-42R vs wt-42G diff		ARF2sm-42G up vs wt-42G	ARF2sm-42R up vs wt-42G		ARF2sm-42G&R up vs wt-42G	Phytosulfokines 5 (AHRD V1 *-*- PSK5_ORYSJ)%3B contains Interpro domain(s) IPR009438	at3g44735.2	| symbols: psk3 | phytosulfokine 3 precursor | chr3:16291388-16292118 reverse length=81	Solyc10g083580.1.1	SL2.40ch10	62691048	62692695	CT124	65.463	62704778	TES1842	65.573	62639911	\N	\N	extracellular region	GO:0005576	\N	\N	#N/A	#N/A	Solyc10g083580.1	0.00182484	2.47276	2.47276	ARF2sm-42G up vs wt-42G	0.002979	2.24878	2.24878	ARF2sm-42R up vs wt-42G	0	0	0
Solyc11g010650.2	ARF2sm-42Gvswt-42G diff	ARF2sm-42R vs wt-42G diff		ARF2sm-42G up vs wt-42G	ARF2sm-42R up vs wt-42G		ARF2sm-42G&R up vs wt-42G	Unknown Protein (AHRD V1)%3B contains Interpro domain(s) IPR000868 Isochorismatase-li	at2g22570.1	| symbols: atnic1 nic1 | nicotinamidase 1 | chr2:9589604-9590846 reverse length=244	Solyc11g010650.2.1	SL2.40ch11	3704467	3706636	TES0152	42.323	4087105	TGS0293	43.415	3604622	\N	\N	\N	\N	nicotinamidase activity	GO:0008936	pyridine nucleotide cycling (plants)	nicotinamidase	Solyc11g010650.2	0.000599656	2.06777	2.06777	ARF2sm-42G up vs wt-42G	0.000647142	2.04354	2.04354	ARF2sm-42R up vs wt-42G	0	0	0
Solyc12g008800.1	ARF2sm-42Gvswt-42G diff	ARF2sm-42R vs wt-42G diff		ARF2sm-42G up vs wt-42G	ARF2sm-42R up vs wt-42G		ARF2sm-42G&R up vs wt-42G	MYB transcription factor (AHRD V1 ***- Q9LVS0_ARATH)%3B contains Interpro domain(s) IP	at5g56840.1	| symbols: | myb-like transcription factor family protein | chr5:22980789-22982152 forw	Solyc12g008800.1.1	SL2.40ch12	2142818	2144657	TEI0474	33.909	2185634	TES1889	30.509	1810950	\N	\N	\N	\N	DNA binding	GO:0003677	#N/A	#N/A	Solyc12g008800.1	0.00222308	2.72612	2.72612	ARF2sm-42G up vs wt-42G	0.0064975	2.18435	2.18435	ARF2sm-42R up vs wt-42G	0	0	0
Solyc12g096570.1	ARF2sm-42Gvswt-42G diff	ARF2sm-42R vs wt-42G diff		ARF2sm-42G up vs wt-42G	ARF2sm-42R up vs wt-42G		ARF2sm-42G&R up vs wt-42G	ARGOS (AHRD V1 ***- C7SFP7_SOLLC)	at3g59900.1	| symbols: argos | auxin-regulated gene involved in organ size | chr3:22130041-22130433	Solyc12g096570.1.1	SL2.40ch12	63770819	63771175	T882	96.645	63786800	T1784	94.868	63556172	\N	\N	\N	\N	\N	\N	#N/A	#N/A	Solyc12g096570.1	0.00112001	17.2287	17.2287	ARF2sm-42G up vs wt-42G	0.00344861	9.13133	9.13133	ARF2sm-42R up vs wt-42G	0	0	0
AFFX-r2-Bs-thr-5_s_st		ARF2sm-42R vs wt-42G diff			ARF2sm-42R down vs wt-42G		ARF2sm-42R down vs wt-42G																				#N/A	#N/A	AFFX-r2-Bs-thr-5_s_st	0	0	0		0.00133136	0.482618	-2.07203	ARF2sm-42R down vs wt-42G	0	0	0
Solyc00g013190.1		ARF2sm-42R vs wt-42G diff			ARF2sm-42R down vs wt-42G		ARF2sm-42R down vs wt-42G	Unknown Protein (AHRD V1)	none	none	Solyc00g013190.1.1	SL2.40ch00	10692250	10692603	TGS0646	37.059	12215233	\NA	\NA	\NA	\N	\N	\N	\N	\N	\N	#N/A	#N/A	Solyc00g013190.1	0	0	0		0.00873943	0.446861	-2.23783	ARF2sm-42R down vs wt-42G	0	0	0
Solyc01g005410.2		ARF2sm-42R vs wt-42G diff			ARF2sm-42R down vs wt-42G		ARF2sm-42R down vs wt-42G	Calcium binding protein Caleosin (AHRD V1 **-* A8N0P5_COPC7)%3B contains Interpro domai	at1g70670.1	| symbols: | caleosin-related family protein | chr1:26644830-26645970 forward length=19	Solyc01g005410.2.1	SL2.40ch01	286564	290172	CT233	1.705	303123	tma0313	2.934	257609	\N	\N	\N	\N	calcium ion binding	GO:0005509	#N/A	#N/A	Solyc01g005410.2	0	0	0		0.00408658	0.447683	-2.23372	ARF2sm-42R down vs wt-42G	0	0	0
Solyc01g005550.2		ARF2sm-42R vs wt-42G diff			ARF2sm-42R down vs wt-42G		ARF2sm-42R down vs wt-42G	Carboxyl-terminal peptidase (AHRD V1 ***- B6U8T6_MAIZE)%3B contains Interpro domain(s)	at1g55360.1	| symbols: | protein of unknown function (duf239) | chr1:20666526-20668502 reverse leng	Solyc01g005550.2.1	SL2.40ch01	382300	385329	TES0856	12.244	776972	TES1019	0	350867	\N	\N	\N	\N	\N	\N	#N/A	#N/A	Solyc01g005550.2	0	0	0		0.00220142	0.451601	-2.21435	ARF2sm-42R down vs wt-42G	0	0	0
Solyc01g007520.2		ARF2sm-42R vs wt-42G diff			ARF2sm-42R down vs wt-42G		ARF2sm-42R down vs wt-42G	Photosystem II reaction center protein H (AHRD V1 ***- C6JT33_9MYRT)%3B contains Interp	atcg00710.1	| symbols: psbh | photosystem ii reaction center protein h | chrc:74485-74706 forward l	Solyc01g007520.2.1	SL2.40ch01	1871661	1872371	TES0233	24.101	2119835	TES0943	24.131	1801278	\N	\N	membrane	GO:0016020	\N	\N	#N/A	#N/A	Solyc01g007520.2	0	0	0		0.00386652	0.48875	-2.04604	ARF2sm-42R down vs wt-42G	0	0	0
Solyc01g008130.2		ARF2sm-42R vs wt-42G diff			ARF2sm-42R down vs wt-42G		ARF2sm-42R down vs wt-42G	DEP domain-containing protein 1B (AHRD V1 *--- DEP1B_HUMAN)%3B contains Interpro domain	at3g11920.1	| symbols: | glutaredoxin-related | chr3:3772311-3774887 forward length=630	Solyc01g008130.2.1	SL2.40ch01	2274518	2283875	TGS3442	24.883	2365368	TEI0013	23.645	2249798	cell redox homeostasis	GO:0045454	\N	\N	\N	\N	#N/A	#N/A	Solyc01g008130.2	0	0	0		0.0019702	0.478881	-2.0882	ARF2sm-42R down vs wt-42G	0	0	0
Solyc01g008420.2		ARF2sm-42R vs wt-42G diff			ARF2sm-42R down vs wt-42G		ARF2sm-42R down vs wt-42G	Mate efflux family protein (AHRD V1 **-- D7KHQ9_ARALY)%3B contains Interpro domain(s)	at1g51340.2	| symbols: | mate efflux family protein | chr1:19032021-19034681 forward length=515	Solyc01g008420.2.1	SL2.40ch01	2504346	2512080	TGS0377	23.704	2527070	cLET-4-N7	23.677	2482613	\N	\N	membrane	GO:0016020	\N	\N	#N/A	#N/A	Solyc01g008420.2	0	0	0		0.0033718	0.408174	-2.44994	ARF2sm-42R down vs wt-42G	0	0	0
Solyc01g010390.2		ARF2sm-42R vs wt-42G diff			ARF2sm-42R down vs wt-42G		ARF2sm-42R down vs wt-42G	Beta-glucosidase (AHRD V1 ***- D3YJ59_VITVI)%3B contains Interpro domain(s) IPR001360	at1g26560.1	| symbols: bglu40 | beta glucosidase 40 | chr1:9178513-9181726 forward length=510 | sym	Solyc01g010390.2.1	SL2.40ch01	5254174	5260994	TES0020	29.966	5646654	TES0976	26.876	4984270	carbohydrate metabolic process	GO:0005975	\N	\N	\N	\N	coumarin biosynthesis (via 2-coumarate)	Beta-glucosidase	Solyc01g010390.2	0	0	0		0.000299353	0.421299	-2.37361	ARF2sm-42R down vs wt-42G	0	0	0
Solyc01g011480.1		ARF2sm-42R vs wt-42G diff			ARF2sm-42R down vs wt-42G		ARF2sm-42R down vs wt-42G	Photosystem II CP43 chlorophyll apoprotein (AHRD V1 ***- B7T461_9ROSI)%3B contains Inte	atcg00280.1	| symbols: psbc | photosystem ii reaction center protein c | chrc:33720-35141 forward l	Solyc01g011480.1.1	SL2.40ch01	9384328	9384585	TGS0419	33.55	11298546	TGS0972	34.801	9008291	\N	\N	membrane	GO:0016020	\N	\N	#N/A	#N/A	Solyc01g011480.1	0	0	0		0.000861303	0.464659	-2.15212	ARF2sm-42R down vs wt-42G	0	0	0
Solyc01g066640.2		ARF2sm-42R vs wt-42G diff			ARF2sm-42R down vs wt-42G		ARF2sm-42R down vs wt-42G	Os04g0405500 protein (Fragment) (AHRD V1 *-*- Q0JDG3_ORYSJ)	at5g49100.1	| symbols: | unknown protein best arabidopsis thaliana protein match is: unknown prote	Solyc01g066640.2.1	SL2.40ch01	67226826	67228376	TGS1523	36.943	67512176	TES0983	39.088	67037367	\N	\N	\N	\N	\N	\N	#N/A	#N/A	Solyc01g066640.2	0	0	0		0.00679176	0.349117	-2.86437	ARF2sm-42R down vs wt-42G	0	0	0
Solyc01g068560.2		ARF2sm-42R vs wt-42G diff			ARF2sm-42R down vs wt-42G		ARF2sm-42R down vs wt-42G	Unknown Protein (AHRD V1)	none	none	Solyc01g068560.2.1	SL2.40ch01	70162434	70163248	TGS1999	50.691	70237796	TES0609	47.097	70156627	\N	\N	\N	\N	\N	\N	#N/A	#N/A	Solyc01g068560.2	0	0	0		0.00441204	0.422115	-2.36902	ARF2sm-42R down vs wt-42G	0	0	0
Solyc01g073710.2		ARF2sm-42R vs wt-42G diff			ARF2sm-42R down vs wt-42G		ARF2sm-42R down vs wt-42G	Calcium-binding EF hand family protein (AHRD V1 ***- D7LKY8_ARALY)%3B contains Interpro	at2g44310.1	| symbols: | calcium-binding ef-hand family protein | chr2:18309285-18309713 forward le	Solyc01g073710.2.1	SL2.40ch01	70324522	70325265	TES0039	50.519	70961518	T1627	49.176	70295805	\N	\N	\N	\N	calcium ion binding	GO:0005509	#N/A	#N/A	Solyc01g073710.2	0	0	0		3.28876e-06	0.429417	-2.32874	ARF2sm-42R down vs wt-42G	0	0	0
Solyc01g080540.2		ARF2sm-42R vs wt-42G diff			ARF2sm-42R down vs wt-42G		ARF2sm-42R down vs wt-42G	Histidine-containing phosphotransfer protein (AHRD V1 **** Q94KS0_CATRO)%3B contains In	at3g21510.1	| symbols: ahp1 | histidine-containing phosphotransmitter 1 | chr3:7578432-7579537 reve	Solyc01g080540.2.1	SL2.40ch01	72299197	72301457	TES1262	48.518	72426442	T1662	49.204	72179133	\N	\N	\N	\N	histidine phosphotransfer kinase activity	GO:0009927	#N/A	#N/A	Solyc01g080540.2	0	0	0		0.00954195	0.45644	-2.19087	ARF2sm-42R down vs wt-42G	0	0	0
Solyc01g080870.2		ARF2sm-42R vs wt-42G diff			ARF2sm-42R down vs wt-42G		ARF2sm-42R down vs wt-42G	Peptide transporter-like protein (AHRD V1 **-* Q9SVS9_ARATH)%3B contains Interpro domai	at1g32450.1	| symbols: nrt1.5 | nitrate transporter 1.5 | chr1:11715337-11719807 reverse length=614	Solyc01g080870.2.1	SL2.40ch01	72695723	72699855	CT231	49.176	72705216	cLEY14C14	49.237	72509073	\N	\N	\N	\N	dipeptide transporter activity	GO:0042936	#N/A	#N/A	Solyc01g080870.2	0	0	0		0.00702364	0.154975	-6.45266	ARF2sm-42R down vs wt-42G	0	0	0
Solyc01g081320.2		ARF2sm-42R vs wt-42G diff			ARF2sm-42R down vs wt-42G		ARF2sm-42R down vs wt-42G	Pentatricopeptide repeat-containing protein (AHRD V1 ***- D7M643_ARALY)%3B contains Int													\N	\N	\N	\N	\N	\N	#N/A	#N/A	Solyc01g081320.2	0	0	0		0.000938318	0.473603	-2.11147	ARF2sm-42R down vs wt-42G	0	0	0
Solyc01g081570.2		ARF2sm-42R vs wt-42G diff			ARF2sm-42R down vs wt-42G		ARF2sm-42R down vs wt-42G	Carboxyl-terminal peptidase (AHRD V1 ***- B6TV70_MAIZE)%3B contains Interpro domain(s)	at1g55360.1	| symbols: | protein of unknown function (duf239) | chr1:20666526-20668502 reverse leng	Solyc01g081570.2.1	SL2.40ch01	73275835	73278744	TES1849	47.788	73559725	TEI0133	50.177	72900264	\N	\N	\N	\N	\N	\N	#N/A	#N/A	Solyc01g081570.2	0	0	0		0.00476534	0.432538	-2.31194	ARF2sm-42R down vs wt-42G	0	0	0
Solyc01g090950.2		ARF2sm-42R vs wt-42G diff			ARF2sm-42R down vs wt-42G		ARF2sm-42R down vs wt-42G	GRAS family transcription factor (AHRD V1 **-- B9GPD0_POPTR)%3B contains Interpro domai	at4g00150.1	| symbols: ham3 atham3 lom3 | gras family transcription factor | chr4:57429-59105 rev	Solyc01g090950.2.1	SL2.40ch01	76416878	76419772	TES0785	58.439	76477216	cLET-5-J13	55.777	75894059	\N	\N	\N	\N	\N	\N	#N/A	#N/A	Solyc01g090950.2	0	0	0		0.00714471	0.396331	-2.52314	ARF2sm-42R down vs wt-42G	0	0	0
Solyc01g094890.2		ARF2sm-42R vs wt-42G diff			ARF2sm-42R down vs wt-42G		ARF2sm-42R down vs wt-42G	Ferric reductase oxidase (AHRD V1 **-* D6RVS5_HORVU)%3B contains Interpro domain(s) IP	at1g01580.1	| symbols: fro2 frd1 atfro2 | ferric reduction oxidase 2 | chr1:209395-212810 forward	Solyc01g094890.2.1	SL2.40ch01	78052564	78059855	TES1943	76.789	78199116	TEI0548	76.672	77958354	\N	\N	\N	\N	ferric-chelate reductase activity	GO:0000293	Fe(III)-reduction and Fe(II) transport	ferric-chelate reductase	Solyc01g094890.2	0	0	0		0.0053088	0.376317	-2.65734	ARF2sm-42R down vs wt-42G	0	0	0
Solyc01g096240.2		ARF2sm-42R vs wt-42G diff			ARF2sm-42R down vs wt-42G		ARF2sm-42R down vs wt-42G	Homology to unknown gene (AHRD V1 ***- Q01FV7_OSTTA)	at3g61870.1	| symbols: | unknown protein functions in: molecular_function unknown involved in: bi	Solyc01g096240.2.1	SL2.40ch01	79091598	79095176	TES1414	90.247	79320515	TGS2162	83.85	78788109	\N	\N	\N	\N	\N	\N	#N/A	#N/A	Solyc01g096240.2	0	0	0		0.00326423	0.415076	-2.4092	ARF2sm-42R down vs wt-42G	0	0	0
Solyc01g096430.2		ARF2sm-42R vs wt-42G diff			ARF2sm-42R down vs wt-42G		ARF2sm-42R down vs wt-42G	Predicted NADPH-dependent FMN reductase (AHRD V1 ***- Q0W0S0_UNCMA)%3B contains Interpr	at3g27890.1	| symbols: nqr | nadph:quinone oxidoreductase | chr3:10350807-10351938 reverse length=1	Solyc01g096430.2.1	SL2.40ch01	79285952	79288255	TES1414	90.247	79320515	TGS2162	83.85	78788109	\N	\N	\N	\N	\N	\N	NA	NADPH:quinone oxidoreductase	Solyc01g096430.2	0	0	0		0.00649207	0.386114	-2.58991	ARF2sm-42R down vs wt-42G	0	0	0
Solyc01g097390.2		ARF2sm-42R vs wt-42G diff			ARF2sm-42R down vs wt-42G		ARF2sm-42R down vs wt-42G	Aldo/keto reductase family protein (AHRD V1 ***- D7KWQ9_ARALY)%3B contains Interpro dom	at1g60680.1	| symbols: | nad(p)-linked oxidoreductase superfamily protein | chr1:22347824-22349236	Solyc01g097390.2.1	SL2.40ch01	80028719	80032895	TM40	95.3	80067688	TES1752	93.754	79958166	protein phosphorylation oxidation-reduction process	GO:0006468 GO:0055114	\N	\N	\N	\N	#N/A	#N/A	Solyc01g097390.2	0	0	0		0.00863383	0.325673	-3.07056	ARF2sm-42R down vs wt-42G	0	0	0
Solyc01g097970.2		ARF2sm-42R vs wt-42G diff			ARF2sm-42R down vs wt-42G		ARF2sm-42R down vs wt-42G	Deoxyuridine 5%26apos-triphosphate nucleotidohydrolase (AHRD V1 ***- C1E7B9_9CHLO)%3B c	at3g46940.1	| symbols: dut1 | dutp-pyrophosphatase-like 1 | chr3:17288367-17288867 reverse length=1	Solyc01g097970.2.1	SL2.40ch01	80384178	80385328	cLPT-5-M7	100.214	80797612	T664	96.916	80278335	dUTP metabolic process	GO:0046080	\N	\N	\N	\N	NA	dUTP diphosphatase	Solyc01g097970.2	0	0	0		0.00824902	0.454607	-2.1997	ARF2sm-42R down vs wt-42G	0	0	0
Solyc01g098390.2		ARF2sm-42R vs wt-42G diff			ARF2sm-42R down vs wt-42G		ARF2sm-42R down vs wt-42G	GID1-like gibberellin receptor (AHRD V1 **-- A7MAQ4_HORVU)%3B contains Interpro domain(	at5g27320.1	| symbols: atgid1c gid1c | alpha/beta-hydrolases superfamily protein | chr5:9629254-96	Solyc01g098390.2.1	SL2.40ch01	80677748	80680126	cLPT-5-M7	100.214	80797612	T664	96.916	80278335	metabolic process	GO:0008152	\N	\N	\N	\N	#N/A	#N/A	Solyc01g098390.2	0	0	0		0.00585886	0.336556	-2.97128	ARF2sm-42R down vs wt-42G	0	0	0
Solyc01g098640.2		ARF2sm-42R vs wt-42G diff			ARF2sm-42R down vs wt-42G		ARF2sm-42R down vs wt-42G	UPF0603 protein At1g54780%2C chloroplastic (AHRD V1 **-- U603_ARATH)%3B contains Interp	at1g54780.1	| symbols: tlp18.3 | thylakoid lumen 18.3 kda protein | chr1:20439533-20440953 forward	Solyc01g098640.2.1	SL2.40ch01	80853972	80856857	T1488	103.766	81429728	cLPT-5-M7	100.214	80797612	\N	\N	\N	\N	\N	\N	#N/A	#N/A	Solyc01g098640.2	0	0	0		0.00184878	0.345411	-2.8951	ARF2sm-42R down vs wt-42G	0	0	0
Solyc01g100220.2		ARF2sm-42R vs wt-42G diff			ARF2sm-42R down vs wt-42G		ARF2sm-42R down vs wt-42G	GATA transcription factor 22 (AHRD V1 *-*- B6U513_MAIZE)%3B contains Interpro domain(s)	at3g16870.1	| symbols: gata17 | gata transcription factor 17 | chr3:5763752-5764576 reverse length=	Solyc01g100220.2.1	SL2.40ch01	82030138	82031017	TES1886	110.542	82279335	TEI0125	107.717	81714716	regulation of transcription, DNA-dependent	GO:0006355	\N	\N	\N	\N	#N/A	#N/A	Solyc01g100220.2	0	0	0		0.00588376	0.418164	-2.39141	ARF2sm-42R down vs wt-42G	0	0	0
Solyc01g101100.2		ARF2sm-42R vs wt-42G diff			ARF2sm-42R down vs wt-42G		ARF2sm-42R down vs wt-42G	Receptor-like protein kinase (AHRD V1 ***- Q9LYS5_ARATH)%3B contains Interpro domain(s)	at1g56720.3	| symbols: | protein kinase superfamily protein | chr1:21263630-21265559 reverse length	Solyc01g101100.2.1	SL2.40ch01	82707636	82712173	TGS1141	114.304	82756655	TG142	113.35	82703454	protein phosphorylation	GO:0006468	\N	\N	\N	\N	NA	Receptor-like protein kinase	Solyc01g101100.2	0	0	0		0.00115429	0.470728	-2.12437	ARF2sm-42R down vs wt-42G	0	0	0
Solyc01g101240.2		ARF2sm-42R vs wt-42G diff			ARF2sm-42R down vs wt-42G		ARF2sm-42R down vs wt-42G	Aspartic proteinase (AHRD V1 **** ASPRX_ORYSJ)%3B contains Interpro domain(s) IPR00146	at1g11910.1	| symbols: apa1 atapa1 | aspartic proteinase a1 | chr1:4017119-4019874 reverse length=	Solyc01g101240.2.1	SL2.40ch01	82818855	82824013	TES1345	114.521	82833501	TGS1141	114.304	82756655	\N	\N	\N	\N	aspartic-type endopeptidase activity	GO:0004190	#N/A	#N/A	Solyc01g101240.2	0	0	0		0.00173606	0.488175	-2.04844	ARF2sm-42R down vs wt-42G	0	0	0
Solyc01g103530.2		ARF2sm-42R vs wt-42G diff			ARF2sm-42R down vs wt-42G		ARF2sm-42R down vs wt-42G	Receptor like kinase%2C RLK Receptor like kinase%2C RLK	at4g20270.1	| symbols: bam3 | leucine-rich receptor-like protein kinase family protein | chr4:10949	Solyc01g103530.2.1	SL2.40ch01	83882217	83886479	T1669	120.527	83981998	T141	119.285	83839778	\N	\N	\N	\N	transmembrane receptor protein serine/threonine kinase activity	GO:0004675	NA	Receptor protein kinase CLAVATA1 precursor, putative	Solyc01g103530.2	0	0	0		0.00349913	0.293992	-3.40145	ARF2sm-42R down vs wt-42G	0	0	0
Solyc01g104470.2		ARF2sm-42R vs wt-42G diff			ARF2sm-42R down vs wt-42G		ARF2sm-42R down vs wt-42G	mRNA turnover protein 4 homolog (AHRD V1 **-- B5X718_SALSA)	at1g25260.1	| symbols: | ribosomal protein l10 family protein | chr1:8854163-8855766 reverse length	Solyc01g104470.2.1	SL2.40ch01	84693611	84696766	TES0238	121.801	84886889	TG245	122.53	84202389	\N	\N	\N	\N	structural constituent of ribosome	GO:0003735	#N/A	#N/A	Solyc01g104470.2	0	0	0		5.22305e-05	0.463657	-2.15677	ARF2sm-42R down vs wt-42G	0	0	0
Solyc01g105030.2		ARF2sm-42R vs wt-42G diff			ARF2sm-42R down vs wt-42G		ARF2sm-42R down vs wt-42G	Chlorophyll a-b binding protein%2C chloroplastic (AHRD V1 **** CB12_PETHY)%3B contains	at1g15820.1	| symbols: lhcb6 cp24 | light harvesting complex photosystem ii subunit 6 | chr1:54466	Solyc01g105030.2.1	SL2.40ch01	85087662	85089049	TES1231	125.647	85270637	TES1036	124.172	85086537	\N	\N	\N	\N	chlorophyll binding	GO:0016168	#N/A	#N/A	Solyc01g105030.2	0	0	0		0.0013445	0.159445	-6.27175	ARF2sm-42R down vs wt-42G	0	0	0
Solyc01g110380.2		ARF2sm-42R vs wt-42G diff			ARF2sm-42R down vs wt-42G		ARF2sm-42R down vs wt-42G	Kinesin like protein (AHRD V1 *-*- Q0WLK7_ARATH)%3B contains Interpro domain(s) IPR001	at2g21300.2	| symbols: | atp binding microtubule motor family protein | chr2:9114396-9118292 revers	Solyc01g110380.2.1	SL2.40ch01	88860841	88867416	C2_At4g34700	148.951	88870284	TM6	148.543	88844999	microtubule-based movement	GO:0007018	\N	\N	\N	\N	#N/A	#N/A	Solyc01g110380.2	0	0	0		0.0027979	0.446077	-2.24177	ARF2sm-42R down vs wt-42G	0	0	0
Solyc02g020940.2		ARF2sm-42R vs wt-42G diff			ARF2sm-42R down vs wt-42G		ARF2sm-42R down vs wt-42G	Glyceraldehyde-3-phosphate dehydrogenase (AHRD V1 **** D7UNZ5_BRARC)%3B contains Interp	at1g12900.1	| symbols: gapa-2 | glyceraldehyde 3-phosphate dehydrogenase a subunit 2 | chr1:4392634	Solyc02g020940.2.1	SL2.40ch02	11082387	11084169	cLEC-7-P21	2.976	12277544	tma0256	4.375	9586818	\N	\N	\N	\N	glyceraldehyde-3-phosphate dehydrogenase (NAD+) (phosphorylating) activity	GO:0004365	Calvin-Benson-Bassham cycle	Glyceraldehyde-3-phosphate dehydrogenase	Solyc02g020940.2	0	0	0		0.000309453	0.115821	-8.63403	ARF2sm-42R down vs wt-42G	0	0	0
Solyc02g055440.2		ARF2sm-42R vs wt-42G diff			ARF2sm-42R down vs wt-42G		ARF2sm-42R down vs wt-42G	Genomic DNA chromosome 3 P1 clone MPN9 (AHRD V1 ***- Q9LT28_ARATH)	at3g19800.2	| symbols: | protein of unknown function (duf177) | chr3:6876153-6877471 forward length	Solyc02g055440.2.1	SL2.40ch02	26960778	26961988	tma0121	4.723	27429541	TGS2853	3.709	25075729	\N	\N	\N	\N	\N	\N	#N/A	#N/A	Solyc02g055440.2	0	0	0		0.00285101	0.0296201	-33.7609	ARF2sm-42R down vs wt-42G	0	0	0
Solyc02g061990.2		ARF2sm-42R vs wt-42G diff			ARF2sm-42R down vs wt-42G		ARF2sm-42R down vs wt-42G	Basic leucine zipper transcription factor (AHRD V1 **-* Q9FQ01_9ROSI)	at4g35900.1	| symbols: fd fd-1 atbzip14 | basic-leucine zipper (bzip) transcription factor family	Solyc02g061990.2.1	SL2.40ch02	28138445	28139794	TES0332	12.045	28751988	tma0121	4.723	27429541	\N	\N	\N	\N	protein binding	GO:0005515	#N/A	#N/A	Solyc02g061990.2	0	0	0		0.000916876	0.470323	-2.1262	ARF2sm-42R down vs wt-42G	0	0	0
Solyc02g062140.2		ARF2sm-42R vs wt-42G diff			ARF2sm-42R down vs wt-42G		ARF2sm-42R down vs wt-42G	Armadillo/beta-catenin repeat family protein (AHRD V1 ***- D7MDH4_ARALY)%3B contains In	at5g66200.1	| symbols: aro2 | armadillo repeat only 2 | chr5:26453648-26455603 reverse length=651	Solyc02g062140.2.1	SL2.40ch02	28287621	28290137	TES0332	12.045	28751988	tma0121	4.723	27429541	\N	\N	\N	\N	binding	GO:0005488	#N/A	#N/A	Solyc02g062140.2	0	0	0		0.00577122	0.360789	-2.7717	ARF2sm-42R down vs wt-42G	0	0	0
Solyc02g063270.2		ARF2sm-42R vs wt-42G diff			ARF2sm-42R down vs wt-42G		ARF2sm-42R down vs wt-42G	Multidrug and toxin extrusion protein 1 (AHRD V1 **-- S47A1_MOUSE)%3B contains Interpro	at1g66760.2	| symbols: | mate efflux family protein | chr1:24902110-24904213 forward length=482	Solyc02g063270.2.1	SL2.40ch02	29907935	29911147	TEI0565	15.771	30145525	T1117	14.887	29792128	\N	\N	\N	\N	\N	\N	#N/A	#N/A	Solyc02g063270.2	0	0	0		0.00250342	0.464451	-2.15308	ARF2sm-42R down vs wt-42G	0	0	0
Solyc02g068060.2		ARF2sm-42R vs wt-42G diff			ARF2sm-42R down vs wt-42G		ARF2sm-42R down vs wt-42G	Receptor like kinase%2C RLK Receptor like kinase%2C RLK	at5g14210.1	| symbols: | leucine-rich repeat protein kinase family protein | chr5:4578503-4581374 r	Solyc02g068060.2.1	SL2.40ch02	32685906	32690149	TGS0785	34.072	32835780	TES0488	30.621	32593348	\N	\N	\N	\N	transmembrane receptor protein serine/threonine kinase activity	GO:0004675	#N/A	#N/A	Solyc02g068060.2	0	0	0		0.000813257	0.423906	-2.35901	ARF2sm-42R down vs wt-42G	0	0	0
Solyc02g069350.2		ARF2sm-42R vs wt-42G diff			ARF2sm-42R down vs wt-42G		ARF2sm-42R down vs wt-42G	Transmembrane protein 56 (AHRD V1 ***- B6TI82_MAIZE)%3B contains Interpro domain(s) IP	at1g31300.2	| symbols: | tram lag1 and cln8 (tlc) lipid-sensing domain containing protein | chr1:1	Solyc02g069350.2.1	SL2.40ch02	33842725	33851382	T697	42.339	33918688	TGS2094	40.847	33806072	\N	\N	integral to membrane	GO:0016021	\N	\N	#N/A	#N/A	Solyc02g069350.2	0	0	0		0.00366864	0.416463	-2.40117	ARF2sm-42R down vs wt-42G	0	0	0
Solyc02g069620.2		ARF2sm-42R vs wt-42G diff			ARF2sm-42R down vs wt-42G		ARF2sm-42R down vs wt-42G	Ribose 5-phosphate isomerase-like (AHRD V1 ***- Q2LC22_9ASTR)%3B contains Interpro doma	at5g44520.1	| symbols: | nagb/rpia/coa transferase-like superfamily protein | chr5:17934610-1793644	Solyc02g069620.2.1	SL2.40ch02	34035676	34038248	T1668	42.48	34056574	TES0424	42.052	34017903	pentose-phosphate shunt, non-oxidative branch	GO:0009052	\N	\N	\N	\N	#N/A	#N/A	Solyc02g069620.2	0	0	0		0.00189473	0.413828	-2.41646	ARF2sm-42R down vs wt-42G	0	0	0
Solyc02g070310.2		ARF2sm-42R vs wt-42G diff			ARF2sm-42R down vs wt-42G		ARF2sm-42R down vs wt-42G	Ribosomal protein L32 (AHRD V1 ***- Q45NI6_MEDSA)%3B contains Interpro domain(s) IPR01	at4g18100.1	| symbols: | ribosomal protein l32e | chr4:10035715-10036475 reverse length=133 | symbo	Solyc02g070310.2.1	SL2.40ch02	34670896	34672676	T1256	46.272	34754487	TGS2022	43.342	34413459	\N	\N	\N	\N	protein binding structural constituent of ribosome	GO:0005515 GO:0003735	#N/A	#N/A	Solyc02g070310.2	0	0	0		4.62403e-05	0.466282	-2.14463	ARF2sm-42R down vs wt-42G	0	0	0
Solyc02g071610.2		ARF2sm-42R vs wt-42G diff			ARF2sm-42R down vs wt-42G		ARF2sm-42R down vs wt-42G	GDSL esterase/lipase At5g45670 (AHRD V1 ***- GDL82_ARATH)%3B contains Interpro domain(s	at5g45670.1	| symbols: | gdsl-like lipase/acylhydrolase superfamily protein | chr5:18528600-1853016	Solyc02g071610.2.1	SL2.40ch02	35588862	35591358	cLPT1E8	51.822	35661962	T1654	53.36	35369124	\N	\N	\N	\N	carboxylesterase activity	GO:0004091	NA	carboxylesterase	Solyc02g071610.2	0	0	0		0.00401517	0.214501	-4.66199	ARF2sm-42R down vs wt-42G	0	0	0
Solyc02g077630.2		ARF2sm-42R vs wt-42G diff			ARF2sm-42R down vs wt-42G		ARF2sm-42R down vs wt-42G	Receptor like kinase%2C RLK	at1g28440.1	| symbols: hsl1 | haesa-like 1 | chr1:9996914-10000171 forward length=996	Solyc02g077630.2.1	SL2.40ch02	37086211	37090305	TES1976	66.855	37435987	TEI0633	60.534	36819521	\N	\N	\N	\N	transmembrane receptor protein serine/threonine kinase activity	GO:0004675	NA	Receptor-like protein kinase HSL1	Solyc02g077630.2	0	0	0		0.000205155	0.411421	-2.4306	ARF2sm-42R down vs wt-42G	0	0	0
Solyc02g078600.2		ARF2sm-42R vs wt-42G diff			ARF2sm-42R down vs wt-42G		ARF2sm-42R down vs wt-42G	Solute carrier family 2%2C facilitated glucose transporter member 3 (AHRD V1 ***- GTR3_	at2g20780.1	| symbols: | major facilitator superfamily protein | chr2:8947496-8949170 reverse lengt	Solyc02g078600.2.1	SL2.40ch02	37832984	37835542	TES0912	71.792	37905762	TGS2810	76.126	37767435	\N	\N	\N	\N	D-xylose:hydrogen symporter activity	GO:0015519	#N/A	#N/A	Solyc02g078600.2	0	0	0		0.00463338	0.480332	-2.08189	ARF2sm-42R down vs wt-42G	0	0	0
Solyc02g079390.2		ARF2sm-42R vs wt-42G diff			ARF2sm-42R down vs wt-42G		ARF2sm-42R down vs wt-42G	Uncharacterized Cys-rich domain (AHRD V1 **-- Q2HTU7_MEDTR)%3B contains Interpro domain	at1g11380.1	| symbols: | plac8 family protein | chr1:3832695-3833921 forward length=254	Solyc02g079390.2.1	SL2.40ch02	38547493	38550058	TES0992	79.866	38575021	TEI0339	77.931	38133440	\N	\N	\N	\N	\N	\N	#N/A	#N/A	Solyc02g079390.2	0	0	0		0.00622543	0.25196	-3.96888	ARF2sm-42R down vs wt-42G	0	0	0
Solyc02g079510.2		ARF2sm-42R vs wt-42G diff			ARF2sm-42R down vs wt-42G		ARF2sm-42R down vs wt-42G	Peroxidase (AHRD V1 **** Q50LG4_TOBAC)%3B contains Interpro domain(s) IPR019793 Perox	at5g05340.1	| symbols: | peroxidase superfamily protein | chr5:1579142-1580819 reverse length=324 |	Solyc02g079510.2.1	SL2.40ch02	38622413	38624805	TES1042	82.53	38855898	TES0992	79.866	38575021	\N	\N	\N	\N	protein binding peroxidase activity	GO:0005515 GO:0004601	betanidin degradation	Peroxidase	Solyc02g079510.2	0	0	0		0.00116703	0.0456729	-21.8948	ARF2sm-42R down vs wt-42G	0	0	0
Solyc02g079870.2		ARF2sm-42R vs wt-42G diff			ARF2sm-42R down vs wt-42G		ARF2sm-42R down vs wt-42G	Unknown Protein (AHRD V1)	none	none	Solyc02g079870.2.1	SL2.40ch02	38852771	38853598	TES1042	82.53	38855898	TES0992	79.866	38575021	\N	\N	\N	\N	\N	\N	#N/A	#N/A	Solyc02g079870.2	0	0	0		0.00777458	0.308735	-3.23903	ARF2sm-42R down vs wt-42G	0	0	0
Solyc02g079950.2		ARF2sm-42R vs wt-42G diff			ARF2sm-42R down vs wt-42G		ARF2sm-42R down vs wt-42G	Oxygen-evolving enhancer protein 3 (AHRD V1 ***- Q7Y1T5_PEA)%3B contains Interpro domai	at4g05180.1	| symbols: psbq psbq-2 psii-q | photosystem ii subunit q-2 | chr4:2672093-2673170 rev	Solyc02g079950.2.1	SL2.40ch02	38907616	38909519	TGS1462	81.199	39155721	TES1042	82.53	38855898	\N	\N	extrinsic to membrane	GO:0019898	\N	\N	#N/A	#N/A	Solyc02g079950.2	0	0	0		0.00504854	0.203071	-4.9244	ARF2sm-42R down vs wt-42G	0	0	0
Solyc02g080540.1		ARF2sm-42R vs wt-42G diff			ARF2sm-42R down vs wt-42G		ARF2sm-42R down vs wt-42G	ATP synthase gamma chain (AHRD V1 ***- B7FIR4_MEDTR)%3B contains Interpro domain(s) IP	at4g04640.1	| symbols: atpc1 | atpase f1 complex gamma subunit protein | chr4:2350761-2351882 rev	Solyc02g080540.1.1	SL2.40ch02	39325443	39326576	cLEX4I9	81.927	39396273	T1395	81.854	39318672	\N	\N	\N	\N	enzyme regulator activity	GO:0030234	NA	ATP synthase gamma chain	Solyc02g080540.1	0	0	0		0.0023545	0.206626	-4.83966	ARF2sm-42R down vs wt-42G	0	0	0
Solyc02g080550.1		ARF2sm-42R vs wt-42G diff			ARF2sm-42R down vs wt-42G		ARF2sm-42R down vs wt-42G	Unknown Protein (AHRD V1)	at5g54970.1	| symbols: | unknown protein best arabidopsis thaliana protein match is: unknown prote	Solyc02g080550.1.1	SL2.40ch02	39328981	39329289	cLEX4I9	81.927	39396273	T1395	81.854	39318672	\N	\N	\N	\N	\N	\N	#N/A	#N/A	Solyc02g080550.1	0	0	0		0.00569035	0.337815	-2.9602	ARF2sm-42R down vs wt-42G	0	0	0
Solyc02g080620.2		ARF2sm-42R vs wt-42G diff			ARF2sm-42R down vs wt-42G		ARF2sm-42R down vs wt-42G	Prephenate dehydratase family protein (AHRD V1 **** D7KMI7_ARALY)%3B contains Interpro	at1g11790.1	| symbols: adt1 | arogenate dehydratase 1 | chr1:3981476-3984962 forward length=392 | s	Solyc02g080620.2.1	SL2.40ch02	39383955	39391360	cLEX4I9	81.927	39396273	T1395	81.854	39318672	\N	\N	\N	\N	arogenate dehydratase activity	GO:0047769	phenylalanine biosynthesis I	arogenate/prephenate dehydratase	Solyc02g080620.2	0	0	0		0.00540491	0.433718	-2.30564	ARF2sm-42R down vs wt-42G	0	0	0
Solyc02g081070.2		ARF2sm-42R vs wt-42G diff			ARF2sm-42R down vs wt-42G		ARF2sm-42R down vs wt-42G	Receptor like kinase%2C RLK	at4g22130.1	| symbols: srf8 | strubbelig-receptor family 8 | chr4:11723733-11727331 forward length=	Solyc02g081070.2.1	SL2.40ch02	39719636	39726654	T86	85.915	39806061	TEI0071	85.407	39665865	\N	\N	\N	\N	kinase activity	GO:0016301	#N/A	#N/A	Solyc02g081070.2	0	0	0		0.00266835	0.377589	-2.64838	ARF2sm-42R down vs wt-42G	0	0	0
Solyc02g081150.1		ARF2sm-42R vs wt-42G diff			ARF2sm-42R down vs wt-42G		ARF2sm-42R down vs wt-42G	Unknown Protein (AHRD V1)	at4g22190.1	| symbols: | unknown protein has 283 blast hits to 154 proteins in 44 species: archae	Solyc02g081150.1.1	SL2.40ch02	39789696	39790745	T86	85.915	39806061	TEI0071	85.407	39665865	\N	\N	\N	\N	\N	\N	#N/A	#N/A	Solyc02g081150.1	0	0	0		0.00663822	0.245447	-4.07421	ARF2sm-42R down vs wt-42G	0	0	0
Solyc02g081190.2		ARF2sm-42R vs wt-42G diff			ARF2sm-42R down vs wt-42G		ARF2sm-42R down vs wt-42G	1-aminocyclopropane-1-carboxylate oxidase (AHRD V1 ***- Q9ZWP2_SOLLC)%3B contains Inter	at1g05010.1	| symbols: efe aco4 eat1 | ethylene-forming enzyme | chr1:1431419-1432695 reverse len	Solyc02g081190.2.1	SL2.40ch02	39828688	39830393	C2_At5g64670	85.534	39903517	TEI0470	85.677	39811660	\N	\N	\N	\N	flavonol synthase activity	GO:0045431	ethylene biosynthesis from methionine	1-aminocyclopropane-1-carboxylate oxidase	Solyc02g081190.2	0	0	0		0.00997063	0.433	-2.30947	ARF2sm-42R down vs wt-42G	0	0	0
Solyc02g081210.2		ARF2sm-42R vs wt-42G diff			ARF2sm-42R down vs wt-42G		ARF2sm-42R down vs wt-42G	Expansin (AHRD V1 ***- Q9ZP33_SOLLC)%3B contains Interpro domain(s) IPR002963 Expansi	at3g03220.1	| symbols: atexpa13 exp13 atexp13 athexp alpha 1.22 expa13 | expansin a13 | chr3:74	Solyc02g081210.2.1	SL2.40ch02	39837699	39840600	C2_At5g64670	85.534	39903517	TEI0470	85.677	39811660	plant-type cell wall organization	GO:0009664	extracellular region	GO:0005576	\N	\N	#N/A	#N/A	Solyc02g081210.2	0	0	0		0.00669029	0.304736	-3.28153	ARF2sm-42R down vs wt-42G	0	0	0
Solyc02g083700.2		ARF2sm-42R vs wt-42G diff			ARF2sm-42R down vs wt-42G		ARF2sm-42R down vs wt-42G	Alpha-mannosidase (AHRD V1 **** Q9FKW9_ARATH)%3B contains Interpro domain(s) IPR011682	at5g66150.1	| symbols: | glycosyl hydrolase family 38 protein | chr5:26439013-26444434 reverse leng	Solyc02g083700.2.1	SL2.40ch02	41576605	41584963	TES1132	91.336	41617628	TES0602	92.005	41465958	\N	\N	\N	\N	alpha-mannosidase activity	GO:0004559	NA	Glycosyl hydrolase family 38 protein	Solyc02g083700.2	0	0	0		0.00309873	0.189144	-5.28697	ARF2sm-42R down vs wt-42G	0	0	0
Solyc02g084740.2		ARF2sm-42R vs wt-42G diff			ARF2sm-42R down vs wt-42G		ARF2sm-42R down vs wt-42G	Cytochrome P450 Cytochrome P450 Cytochrome P450	at4g36380.1	| symbols: rot3 | cytochrome p450 superfamily protein | chr4:17187973-17192202 reverse	Solyc02g084740.2.1	SL2.40ch02	42420436	42426374	TEI0121	96.493	42498909	cLEC-7-H4	94.482	42294640	\N	\N	\N	\N	oxidoreductase activity, acting on paired donors, with incorporation or reduction of mo	GO:0016709	NA	Cytochrome P450	Solyc02g084740.2	0	0	0		0.0081473	0.314747	-3.17715	ARF2sm-42R down vs wt-42G	0	0	0
Solyc02g085730.2		ARF2sm-42R vs wt-42G diff			ARF2sm-42R down vs wt-42G		ARF2sm-42R down vs wt-42G	Allene oxide cyclase (AHRD V1 **** Q9LEG5_SOLLC)%3B contains Interpro domain(s) IPR009	at3g25780.1	| symbols: aoc3 | allene oxide cyclase 3 | chr3:9409362-9410409 forward length=258	Solyc02g085730.2.1	SL2.40ch02	43109536	43111867	TES1669	97.323	43214388	TES0368	98.503	42996583	\N	\N	\N	\N	allene-oxide cyclase activity	GO:0046423	jasmonic acid biosynthesis	allene-oxide cyclase	Solyc02g085730.2	0	0	0		0.00518917	0.399092	-2.50569	ARF2sm-42R down vs wt-42G	0	0	0
Solyc02g086940.2		ARF2sm-42R vs wt-42G diff			ARF2sm-42R down vs wt-42G		ARF2sm-42R down vs wt-42G	FAM179B protein (Fragment) (AHRD V1 *--- Q6P183_HUMAN)%3B contains Interpro domain(s)	at5g14790.1	| symbols: | arm repeat superfamily protein | chr5:4784058-4785508 forward length=346	Solyc02g086940.2.1	SL2.40ch02	44106511	44108900	TES1261	105.049	44137490	TES1387	102.512	44071725	\N	\N	\N	\N	binding	GO:0005488	#N/A	#N/A	Solyc02g086940.2	0	0	0		0.0019436	0.449154	-2.22641	ARF2sm-42R down vs wt-42G	0	0	0
Solyc02g087400.1		ARF2sm-42R vs wt-42G diff			ARF2sm-42R down vs wt-42G		ARF2sm-42R down vs wt-42G	Ankyrin repeat domain containing protein (AHRD V1 *--- B2WQ30_PYRTR)%3B contains Interp	at2g47450.1	| symbols: cao cpsrp43 | chloroplast signal recognition particle component (cao) | chr	Solyc02g087400.1.1	SL2.40ch02	44430154	44431260	TGS3413	107.565	44464850	TGS1372	105.475	44323367	\N	\N	\N	\N	identical protein binding	GO:0042802	#N/A	#N/A	Solyc02g087400.1	0	0	0		0.00192161	0.369022	-2.70986	ARF2sm-42R down vs wt-42G	0	0	0
Solyc02g088070.2		ARF2sm-42R vs wt-42G diff			ARF2sm-42R down vs wt-42G		ARF2sm-42R down vs wt-42G	Dof zinc finger protein (AHRD V1 ***- C4B6D7_IPOBA)%3B contains Interpro domain(s) IPR	at3g47500.1	| symbols: cdf3 | cycling dof factor 3 | chr3:17504276-17505964 reverse length=448 | sy	Solyc02g088070.2.1	SL2.40ch02	44845106	44848336	TGS3319	116.931	45040289	TES1003	111.776	44676210	\N	\N	\N	\N	sequence-specific DNA binding transcription factor activity protein binding	GO:0003700 GO:0005515	#N/A	#N/A	Solyc02g088070.2	0	0	0		0.00084621	0.303333	-3.2967	ARF2sm-42R down vs wt-42G	0	0	0
Solyc02g089550.2		ARF2sm-42R vs wt-42G diff			ARF2sm-42R down vs wt-42G		ARF2sm-42R down vs wt-42G	Receptor like kinase%2C RLK	at5g16000.1	| symbols: nik1 | nsp-interacting kinase 1 | chr5:5224264-5227003 forward length=638	Solyc02g089550.2.1	SL2.40ch02	45911202	45914547	TGS1770	123.698	46007383	cLES3G11	122.997	45807448	\N	\N	\N	\N	transmembrane receptor protein serine/threonine kinase activity	GO:0004675	NA	Receptor like kinase%2C RLK	Solyc02g089550.2	0	0	0		0.00422721	0.470065	-2.12737	ARF2sm-42R down vs wt-42G	0	0	0
Solyc02g090030.2		ARF2sm-42R vs wt-42G diff			ARF2sm-42R down vs wt-42G		ARF2sm-42R down vs wt-42G	Oxygen-evolving enhancer protein 1 of photosystem II (AHRD V1 ***- A8J0E4_CHLRE)%3B con	at3g50820.1	| symbols: psbo2 psbo-2 oec33 | photosystem ii subunit o-2 | chr3:18891008-18892311 r	Solyc02g090030.2.1	SL2.40ch02	46276521	46278207	C2_At4g37130	129.472	46434700	cLPT-1-A21	125.919	46183668	\N	\N	\N	\N	poly(U) RNA binding	GO:0008266	#N/A	#N/A	Solyc02g090030.2	0	0	0		0.00302543	0.247764	-4.03609	ARF2sm-42R down vs wt-42G	0	0	0
Solyc02g090260.1		ARF2sm-42R vs wt-42G diff			ARF2sm-42R down vs wt-42G		ARF2sm-42R down vs wt-42G	cDNA clone J20 full insert sequence (AHRD V1 ***- B7ESH6_ORYSJ)													\N	\N	\N	\N	\N	\N	#N/A	#N/A	Solyc02g090260.1	0	0	0		0.00465694	0.482553	-2.07231	ARF2sm-42R down vs wt-42G	0	0	0
Solyc02g090580.2		ARF2sm-42R vs wt-42G diff			ARF2sm-42R down vs wt-42G		ARF2sm-42R down vs wt-42G	Os03g0859900 protein (Fragment) (AHRD V1 *-*- Q0DLK3_ORYSJ)%3B contains Interpro domain	at4g37080.3	| symbols: | protein of unknown function duf547 | chr4:17473719-17476716 forward lengt	Solyc02g090580.2.1	SL2.40ch02	46702603	46706286	T1744	130.946	46761274	C2_At4g37130	129.472	46434700	\N	\N	\N	\N	\N	\N	#N/A	#N/A	Solyc02g090580.2	0	0	0		0.00683062	0.388602	-2.57333	ARF2sm-42R down vs wt-42G	0	0	0
Solyc02g091560.2		ARF2sm-42R vs wt-42G diff			ARF2sm-42R down vs wt-42G		ARF2sm-42R down vs wt-42G	Serine hydroxymethyltransferase (AHRD V1 **** C6ZJZ0_SOYBN)%3B contains Interpro domain	at4g37930.1	| symbols: shm1 stm shmt1 | serine transhydroxymethyltransferase 1 | chr4:17831891-17	Solyc02g091560.2.1	SL2.40ch02	47400296	47406791	TES1644	139.344	47968139	T1400	132.163	47153396	\N	\N	\N	\N	glycine hydroxymethyltransferase activity	GO:0004372	glycine biosynthesis I	serine hydroxymethyltransferase	Solyc02g091560.2	0	0	0		0.00144124	0.166526	-6.00507	ARF2sm-42R down vs wt-42G	0	0	0
Solyc02g092940.2		ARF2sm-42R vs wt-42G diff			ARF2sm-42R down vs wt-42G		ARF2sm-42R down vs wt-42G	Receptor like kinase%2C RLK	at2g23300.1	| symbols: | leucine-rich repeat protein kinase family protein | chr2:9914608-9917130 f	Solyc02g092940.2.1	SL2.40ch02	48488587	48492016	TES1301	162.611	48549401	cLEX-2-I9	147.576	48455490	\N	\N	\N	\N	transmembrane receptor protein serine/threonine kinase activity	GO:0004675	NA	Receptor like kinase%2C RLK	Solyc02g092940.2	0	0	0		0.00380103	0.404354	-2.47308	ARF2sm-42R down vs wt-42G	0	0	0
Solyc02g093160.2		ARF2sm-42R vs wt-42G diff			ARF2sm-42R down vs wt-42G		ARF2sm-42R down vs wt-42G	Filament-like plant protein (Fragment) (AHRD V1 *-*- FPP_SOLLC)%3B contains Interpro do	at2g23360.1	| symbols: | plant protein of unknown function (duf869) | chr2:9949420-9952727 forward	Solyc02g093160.2.1	SL2.40ch02	48680222	48685593	C2_At5g40530	154.13	48853092	TES1925	151.9	48631444	\N	\N	\N	\N	\N	\N	#N/A	#N/A	Solyc02g093160.2	0	0	0		0.00314899	0.44626	-2.24085	ARF2sm-42R down vs wt-42G	0	0	0
Solyc02g093170.2		ARF2sm-42R vs wt-42G diff			ARF2sm-42R down vs wt-42G		ARF2sm-42R down vs wt-42G	Cyclin delta-3 (AHRD V1 **-- Q94JY0_ARATH)	at4g34090.1	| symbols: | unknown protein functions in: molecular_function unknown involved in: bi	Solyc02g093170.2.1	SL2.40ch02	48685606	48688686	C2_At5g40530	154.13	48853092	TES1925	151.9	48631444	\N	\N	\N	\N	\N	\N	#N/A	#N/A	Solyc02g093170.2	0	0	0		7.88194e-05	0.383601	-2.60688	ARF2sm-42R down vs wt-42G	0	0	0
Solyc02g093410.2		ARF2sm-42R vs wt-42G diff			ARF2sm-42R down vs wt-42G		ARF2sm-42R down vs wt-42G	Protein kinase (AHRD V1 **** Q7XJ65_CUCSA)%3B contains Interpro domain(s) IPR015784 T	at5g50180.1	| symbols: | protein kinase superfamily protein | chr5:20431116-20432883 forward length	Solyc02g093410.2.1	SL2.40ch02	48864525	48868381	TES0567	155.127	48968771	C2_At5g40530	154.13	48853092	\N	\N	\N	\N	MAP kinase kinase activity	GO:0004708	NA	Protein kinase	Solyc02g093410.2	0	0	0		0.00490058	0.418063	-2.39198	ARF2sm-42R down vs wt-42G	0	0	0
Solyc02g093770.2		ARF2sm-42R vs wt-42G diff			ARF2sm-42R down vs wt-42G		ARF2sm-42R down vs wt-42G	GPI inositol-deacylase (AHRD V1 *-*- C5FP83_NANOT)%3B contains Interpro domain(s) IPR0	at3g27325.2	| symbols: | hydrolases acting on ester bonds | chr3:10095956-10102087 forward length=	Solyc02g093770.2.1	SL2.40ch02	49064946	49077850	T1096	155.555	49181607	TES0490	155.143	49027153	\N	\N	intrinsic to endoplasmic reticulum membrane	GO:0031227	\N	\N	#N/A	#N/A	Solyc02g093770.2	0	0	0		0.000439844	0.497991	-2.00807	ARF2sm-42R down vs wt-42G	0	0	0
Solyc02g093800.2		ARF2sm-42R vs wt-42G diff			ARF2sm-42R down vs wt-42G		ARF2sm-42R down vs wt-42G	Serine/threonine-protein phosphatase 2A regulatory subunit delta 1 isoform (AHRD V1 ***	at3g26020.2	| symbols: | protein phosphatase 2a regulatory b subunit family protein | chr3:9514363-	Solyc02g093800.2.1	SL2.40ch02	49088997	49094293	T1096	155.555	49181607	TES0490	155.143	49027153	\N	\N	\N	\N	protein kinase binding	GO:0019901	#N/A	#N/A	Solyc02g093800.2	0	0	0		0.00146627	0.445471	-2.24481	ARF2sm-42R down vs wt-42G	0	0	0
Solyc02g094160.1		ARF2sm-42R vs wt-42G diff			ARF2sm-42R down vs wt-42G		ARF2sm-42R down vs wt-42G	Ribonucleoside-diphosphate reductase small chain (AHRD V1 **** B6TLH5_MAIZE)%3B contain	at3g27060.1	| symbols: tso2 attso2 | ferritin/ribonucleotide reductase-like family protein | chr3:	Solyc02g094160.1.1	SL2.40ch02	49359009	49359998	TG154	158.361	49463148	TES0088	156.676	49260919	\N	\N	\N	\N	identical protein binding	GO:0042802	NA	ribonucleoside-diphosphate reductase	Solyc02g094160.1	0	0	0		0.00313327	0.257568	-3.88248	ARF2sm-42R down vs wt-42G	0	0	0
Solyc03g006420.2		ARF2sm-42R vs wt-42G diff			ARF2sm-42R down vs wt-42G		ARF2sm-42R down vs wt-42G	Origin recognition complex subunit 1 (AHRD V1 **-- Q945C8_MAIZE)%3B contains Interpro d	at4g12620.1	| symbols: orc1b atorc1b une13 | origin of replication complex 1b | chr4:7459812-7462	Solyc03g006420.2.1	SL2.40ch03	1013878	1021515	TGS1138	27.735	1325104	TES0894	15.745	924708	\N	\N	\N	\N	double-stranded methylated DNA binding	GO:0010385	#N/A	#N/A	Solyc03g006420.2	0	0	0		0.000222595	0.480423	-2.0815	ARF2sm-42R down vs wt-42G	0	0	0
Solyc03g007170.2		ARF2sm-42R vs wt-42G diff			ARF2sm-42R down vs wt-42G		ARF2sm-42R down vs wt-42G	FK506-binding protein 4 (EC 5.2.1.8)(Peptidyl-prolyl cis-trans isomerase)(PPIase)(Rotam	at4g25340.1	| symbols: fkbp53 atfkbp53 | fk506 binding protein 53 | chr4:12959657-12962632 reverse	Solyc03g007170.2.1	SL2.40ch03	1743953	1748364	TES0480	35.64	1783682	TGS0740	33.661	1691185	\N	\N	\N	\N	FK506 binding	GO:0005528	NA	FK506-binding protein, putative	Solyc03g007170.2	0	0	0		0.000829144	0.460257	-2.1727	ARF2sm-42R down vs wt-42G	0	0	0
Solyc03g007220.2		ARF2sm-42R vs wt-42G diff			ARF2sm-42R down vs wt-42G		ARF2sm-42R down vs wt-42G	Membrane receptor-like protein 1 (AHRD V1 *-*- B3TJG2_CAPAN)	none	none	Solyc03g007220.2.1	SL2.40ch03	1783234	1783752	TES2046	32.899	1919954	TGS0740	33.661	1691185	\N	\N	\N	\N	\N	\N	#N/A	#N/A	Solyc03g007220.2	0	0	0		0.00514789	0.351072	-2.84842	ARF2sm-42R down vs wt-42G	0	0	0
Solyc03g007340.2		ARF2sm-42R vs wt-42G diff			ARF2sm-42R down vs wt-42G		ARF2sm-42R down vs wt-42G	Unknown Protein (AHRD V1)	at5g24130.1	| symbols: | unknown protein functions in: molecular_function unknown involved in: bi	Solyc03g007340.2.1	SL2.40ch03	1902871	1905696	TES2046	32.899	1919954	TES0480	35.64	1783682	\N	\N	\N	\N	\N	\N	#N/A	#N/A	Solyc03g007340.2	0	0	0		0.00372136	0.497349	-2.01066	ARF2sm-42R down vs wt-42G	0	0	0
Solyc03g019650.2		ARF2sm-42R vs wt-42G diff			ARF2sm-42R down vs wt-42G		ARF2sm-42R down vs wt-42G	Nodulin-like protein (AHRD V1 *-*- B6U8U8_MAIZE)%3B contains Interpro domain(s) IPR010	at5g14120.1	| symbols: | major facilitator superfamily protein | chr5:4556308-4558447 forward lengt	Solyc03g019650.2.1	SL2.40ch03	6609000	6612842	TES1837	51.257	6841014	TGS0373	50.242	5751985	\N	\N	\N	\N	\N	\N	#N/A	#N/A	Solyc03g019650.2	0	0	0		0.00450901	0.311808	-3.2071	ARF2sm-42R down vs wt-42G	0	0	0
Solyc03g026220.2		ARF2sm-42R vs wt-42G diff			ARF2sm-42R down vs wt-42G		ARF2sm-42R down vs wt-42G	BCL-2 binding anthanogene-1 (AHRD V1 **** B4FV61_MAIZE)%3B contains Interpro domain(s)	at5g52060.1	| symbols: atbag1 bag1 | bcl-2-associated athanogene 1 | chr5:21152449-21153741 revers	Solyc03g026220.2.1	SL2.40ch03	8010313	8012274	TGS2582	54.463	8110314	TES1297	53.088	7960208	\N	\N	\N	\N	protein binding	GO:0005515	#N/A	#N/A	Solyc03g026220.2	0	0	0		0.00433023	0.375749	-2.66135	ARF2sm-42R down vs wt-42G	0	0	0
Solyc03g034220.2		ARF2sm-42R vs wt-42G diff			ARF2sm-42R down vs wt-42G		ARF2sm-42R down vs wt-42G	Ribulose bisphosphate carboxylase small chain (AHRD V1 ***- A9YTZ7_SOLTU)%3B contains I	at5g38410.1	| symbols: | ribulose bisphosphate carboxylase (small chain) family protein | chr5:1537	Solyc03g034220.2.1	SL2.40ch03	10202373	10205106	TGS0064	55.979	10987801	tmb0008	54.858	10153790	\N	\N	\N	\N	protein binding copper ion binding	GO:0005515 GO:0005507	Calvin-Benson-Bassham cycle	Ribulose bisphosphate carboxylase small chain	Solyc03g034220.2	0	0	0		0.000743616	0.111918	-8.93513	ARF2sm-42R down vs wt-42G	0	0	0
Solyc03g043770.2		ARF2sm-42R vs wt-42G diff			ARF2sm-42R down vs wt-42G		ARF2sm-42R down vs wt-42G	Receptor like kinase%2C RLK	at5g65700.2	| symbols: bam1 | leucine-rich receptor-like protein kinase family protein | chr5:26281	Solyc03g043770.2.1	SL2.40ch03	11300679	11304452	TGS2705	47.801	14174762	TGS0064	55.979	10987801	\N	\N	\N	\N	transmembrane receptor protein serine/threonine kinase activity	GO:0004675	NA	leucine rich repeat receptor protein kinase CLAVATA1	Solyc03g043770.2	0	0	0		0.00808342	0.486092	-2.05722	ARF2sm-42R down vs wt-42G	0	0	0
Solyc03g044330.1		ARF2sm-42R vs wt-42G diff			ARF2sm-42R down vs wt-42G		ARF2sm-42R down vs wt-42G	Acetolactate synthase (AHRD V1 **** D7RPJ7_SOLTU)%3B contains Interpro domain(s) IPR01	at3g48560.1	| symbols: csr1 als ahas tzp5 imr1 | chlorsulfuron/imidazolinone resistant 1 | chr3	Solyc03g044330.1.1	SL2.40ch03	12823169	12825148	TGS2705	47.801	14174762	TGS0064	55.979	10987801	\N	\N	\N	\N	acetolactate synthase activity	GO:0003984	isoleucine biosynthesis I (from threonine)	pyruvate decarboxylase	Solyc03g044330.1	0	0	0		0.00811247	0.223965	-4.46498	ARF2sm-42R down vs wt-42G	0	0	0
Solyc03g045070.1		ARF2sm-42R vs wt-42G diff			ARF2sm-42R down vs wt-42G		ARF2sm-42R down vs wt-42G	Ammonium transporter (AHRD V1 **** B9HP47_POPTR)%3B contains Interpro domain(s) IPR018	at4g13510.1	| symbols: amt1 1 atamt1 atamt1 1 | ammonium transporter 1 1 | chr4:7858220-7859725 f	Solyc03g045070.1.1	SL2.40ch03	15459921	15461303	tma0123	58.664	16085379	TGS0054	61.921	15205158	\N	\N	\N	\N	high affinity secondary active ammonium transmembrane transporter activity	GO:0015398	ammonium transport	ammonium transporter	Solyc03g045070.1	0	0	0		0.00731742	0.222581	-4.49274	ARF2sm-42R down vs wt-42G	0	0	0
Solyc03g046470.2		ARF2sm-42R vs wt-42G diff			ARF2sm-42R down vs wt-42G		ARF2sm-42R down vs wt-42G	Auxin-independent growth promoter protein-like (AHRD V1 **-- Q9LI68_ARATH)%3B contains	at3g30300.1	| symbols: | o-fucosyltransferase family protein | chr3:11921390-11924254 reverse lengt	Solyc03g046470.2.1	SL2.40ch03	16871256	16881175	tma0069	57.019	18861939	tma0123	58.664	16085379	\N	\N	\N	\N	\N	\N	#N/A	#N/A	Solyc03g046470.2	0	0	0		0.000679422	0.489098	-2.04458	ARF2sm-42R down vs wt-42G	0	0	0
Solyc03g051710.1		ARF2sm-42R vs wt-42G diff			ARF2sm-42R down vs wt-42G		ARF2sm-42R down vs wt-42G	Sister-chromatide cohesion protein 3 (AHRD V1 ***- D7LHE4_ARALY)													\N	\N	\N	\N	\N	\N	#N/A	#N/A	Solyc03g051710.1	0	0	0		0.00588519	0.443652	-2.25402	ARF2sm-42R down vs wt-42G	0	0	0
Solyc03g059260.2		ARF2sm-42R vs wt-42G diff			ARF2sm-42R down vs wt-42G		ARF2sm-42R down vs wt-42G	Carboxyl-terminal-processing protease (AHRD V1 ***- B6T6L2_MAIZE)%3B contains Interpro	at3g57680.1	| symbols: | peptidase s41 family protein | chr3:21381054-21383629 forward length=519	Solyc03g059260.2.1	SL2.40ch03	25561139	25565934	tma0181	63.348	26195885	tma0186	58.787	25361869	\N	\N	\N	\N	serine-type endopeptidase activity	GO:0004252	NA	Peptidase S41 family protein	Solyc03g059260.2	0	0	0		0.0079553	0.423987	-2.35856	ARF2sm-42R down vs wt-42G	0	0	0
Solyc03g062930.1		ARF2sm-42R vs wt-42G diff			ARF2sm-42R down vs wt-42G		ARF2sm-42R down vs wt-42G	5%26apos-3%26apos exonuclease N-terminal resolvase-like domain containing protein expre													\N	\N	\N	\N	5'-3' exonuclease activity	GO:0008409	#N/A	#N/A	Solyc03g062930.1	0	0	0		0.00319881	0.369381	-2.70723	ARF2sm-42R down vs wt-42G	0	0	0
Solyc03g078100.2		ARF2sm-42R vs wt-42G diff			ARF2sm-42R down vs wt-42G		ARF2sm-42R down vs wt-42G	Pectinesterase family protein (AHRD V1 ***- D7MRW1_ARALY)%3B contains Interpro domain(s	at5g09760.1	| symbols: | plant invertase/pectin methylesterase inhibitor superfamily | chr5:3032446	Solyc03g078100.2.1	SL2.40ch03	43602569	43604712	TGS2375	56.405	44150623	TGS2301	59.249	42779350	\N	\N	cell wall	GO:0005618	pectinesterase activity	GO:0030599	homogalacturonan degradation	pectinesterase	Solyc03g078100.2	0	0	0		0.00364259	0.291446	-3.43117	ARF2sm-42R down vs wt-42G	0	0	0
Solyc03g083210.2		ARF2sm-42R vs wt-42G diff			ARF2sm-42R down vs wt-42G		ARF2sm-42R down vs wt-42G	At5g24280 (Fragment) (AHRD V1 *-*- Q3YIX0_ARATH) At5g24280 (Fragment) (AHRD V1 *-*- Q3Y	at3g49250.1	| symbols: dms3 idn1 | defective in meristem silencing 3 | chr3:18258613-18260803 reve	Solyc03g083210.2.1	SL2.40ch03	46596166	46611121	TES1138	65.247	46837183	TGS0742	56.546	46533921	\N	\N	\N	\N	protein binding	GO:0005515	#N/A	#N/A	Solyc03g083210.2	0	0	0		0.004769	0.492101	-2.0321	ARF2sm-42R down vs wt-42G	0	0	0
Solyc03g083680.1		ARF2sm-42R vs wt-42G diff			ARF2sm-42R down vs wt-42G		ARF2sm-42R down vs wt-42G	Unknown Protein (AHRD V1)	at3g04640.2	| symbols: | glycine-rich protein | chr3:1261062-1261541 reverse length=159	Solyc03g083680.1.1	SL2.40ch03	47190321	47190635	TGS0958	58.853	47250391	TGS3005	57.269	46866030	\N	\N	\N	\N	\N	\N	#N/A	#N/A	Solyc03g083680.1	0	0	0		0.00489196	0.474465	-2.10764	ARF2sm-42R down vs wt-42G	0	0	0
Solyc03g093700.1		ARF2sm-42R vs wt-42G diff			ARF2sm-42R down vs wt-42G		ARF2sm-42R down vs wt-42G	Histone-lysine N-methyltransferase%2C H3 lysine-9 specific 5 (AHRD V1 *-** EHMT1_HUMAN)	at2g22740.1	| symbols: suvh6 sdg23 | su(var)3-9 homolog 6 | chr2:9664256-9666628 reverse length=79	Solyc03g093700.1.1	SL2.40ch03	48774527	48778274	TGS2927	58.33	49283886	TGS2121	59.572	48154048	\N	\N	\N	\N	histone methyltransferase activity (H3-K9 specific)	GO:0046974	NA	SU(VAR)3-9 homolog 6	Solyc03g093700.1	0	0	0		0.00605007	0.451279	-2.21592	ARF2sm-42R down vs wt-42G	0	0	0
Solyc03g095600.1		ARF2sm-42R vs wt-42G diff			ARF2sm-42R down vs wt-42G		ARF2sm-42R down vs wt-42G	CENP-E like kinetochore protein (AHRD V1 *-*- B6SHI8_MAIZE)	at5g05180.2	| symbols: | unknown protein best arabidopsis thaliana protein match is: unknown prote	Solyc03g095600.1.1	SL2.40ch03	50224682	50226334	TES0174	58.728	50421752	TES0323	61.688	50223363	\N	\N	\N	\N	\N	\N	#N/A	#N/A	Solyc03g095600.1	0	0	0		0.000853751	0.476948	-2.09667	ARF2sm-42R down vs wt-42G	0	0	0
Solyc03g098050.2		ARF2sm-42R vs wt-42G diff			ARF2sm-42R down vs wt-42G		ARF2sm-42R down vs wt-42G	Calmodulin 3 protein (AHRD V1 **** Q712P2_CAPAN)%3B contains Interpro domain(s) IPR011	at3g43810.1	| symbols: cam7 | calmodulin 7 | chr3:15664619-15666355 reverse length=149 | symbols: c	Solyc03g098050.2.1	SL2.40ch03	53844509	53847335	tme0012	61.415	53901781	TES1063	63.533	53819178	\N	\N	\N	\N	calmodulin binding calcium ion binding	GO:0005516 GO:0005509	#N/A	#N/A	Solyc03g098050.2	0	0	0		0.00724112	0.472618	-2.11587	ARF2sm-42R down vs wt-42G	0	0	0
Solyc03g098140.2		ARF2sm-42R vs wt-42G diff			ARF2sm-42R down vs wt-42G		ARF2sm-42R down vs wt-42G	Arabinose-5-phosphate isomerase (AHRD V1 ***- B0TYU5_FRAP2)%3B contains Interpro domain	at3g54690.1	| symbols: | sugar isomerase (sis) family protein | chr3:20246586-20247810 forward leng	Solyc03g098140.2.1	SL2.40ch03	53914820	53918720	TEI0637	58.517	54025398	tme0012	61.415	53901781	carbohydrate metabolic process	GO:0005975	\N	\N	\N	\N	CMP-KDO biosynthesis I	Arabinose-5-phosphate isomerase	Solyc03g098140.2	0	0	0		0.00657	0.481712	-2.07593	ARF2sm-42R down vs wt-42G	0	0	0
Solyc03g111110.1		ARF2sm-42R vs wt-42G diff			ARF2sm-42R down vs wt-42G		ARF2sm-42R down vs wt-42G	Unknown Protein (AHRD V1)	none	none	Solyc03g111110.1.1	SL2.40ch03	55841124	55841351	TES1272	70.168	55986096	TEI0030	68.819	55764685	\N	\N	\N	\N	\N	\N	#N/A	#N/A	Solyc03g111110.1	0	0	0		0.00124187	0.293958	-3.40185	ARF2sm-42R down vs wt-42G	0	0	0
Solyc03g111610.2		ARF2sm-42R vs wt-42G diff			ARF2sm-42R down vs wt-42G		ARF2sm-42R down vs wt-42G	HAD-superfamily hydrolase subfamily IA variant 3 containing protein expressed (AHRD V1	at3g48420.1	| symbols: | haloacid dehalogenase-like hydrolase (had) superfamily protein | chr3:1792	Solyc03g111610.2.1	SL2.40ch03	56300382	56304521	TGS0479	70.271	56366450	TGS2732	72.338	56273771	\N	\N	\N	\N	hydrolase activity protein binding	GO:0016787 GO:0005515	NA	2-deoxyglucose-6-phosphate phosphatase, putative	Solyc03g111610.2	0	0	0		0.00529106	0.457912	-2.18382	ARF2sm-42R down vs wt-42G	0	0	0
Solyc03g114860.2		ARF2sm-42R vs wt-42G diff			ARF2sm-42R down vs wt-42G		ARF2sm-42R down vs wt-42G	Alpha-1 4-glucan-protein synthase (AHRD V1 **-* B9RLK7_RICCO)%3B contains Interpro doma	at3g02230.1	| symbols: rgp1 atrgp1 | reversibly glycosylated polypeptide 1 | chr3:415463-417304 fo	Solyc03g114860.2.1	SL2.40ch03	58802749	58804466	TES1255	82.974	58940656	TES0056	85.686	58681547	\N	\N	\N	\N	cellulose synthase (UDP-forming) activity	GO:0016760	cellulose biosynthesis	cellulose synthase (UDP-forming)	Solyc03g114860.2	0	0	0		0.00619265	0.277294	-3.60628	ARF2sm-42R down vs wt-42G	0	0	0
Solyc03g115660.2		ARF2sm-42R vs wt-42G diff			ARF2sm-42R down vs wt-42G		ARF2sm-42R down vs wt-42G	Cell division protein kinase 12 (AHRD V1 *-** CDK12_HUMAN)%3B contains Interpro domain(	at1g18670.1	| symbols: ibs1 | protein kinase superfamily protein | chr1:6427242-6430696 reverse len	Solyc03g115660.2.1	SL2.40ch03	59353774	59359756	T577	87.089	59467468	TES0359	84.022	59218194	\N	\N	\N	\N	kinase activity	GO:0016301	NA	Protein kinase superfamily protein	Solyc03g115660.2	0	0	0		0.00186089	0.291813	-3.42685	ARF2sm-42R down vs wt-42G	0	0	0
Solyc03g115780.1		ARF2sm-42R vs wt-42G diff			ARF2sm-42R down vs wt-42G		ARF2sm-42R down vs wt-42G	Exonuclease DNA polymerase III epsilon subunit family (AHRD V1 *-*- C7NIC3_KYTSD)%3B co													\N	\N	intracellular	GO:0005622	nucleic acid binding	GO:0003676	#N/A	#N/A	Solyc03g115780.1	0	0	0		0.00618042	0.27466	-3.64086	ARF2sm-42R down vs wt-42G	0	0	0
Solyc03g116020.2		ARF2sm-42R vs wt-42G diff			ARF2sm-42R down vs wt-42G		ARF2sm-42R down vs wt-42G	DNA-directed RNA polymerase (AHRD V1 *--- B9RC12_RICCO)	at5g62440.1	| symbols: | protein of unknown function (duf3223) | chr5:25072620-25073917 reverse len	Solyc03g116020.2.1	SL2.40ch03	59602755	59604468	TES0748	88.041	59745026	T577	87.089	59467468	\N	\N	\N	\N	\N	\N	NA	DNA-directed RNA polymerase	Solyc03g116020.2	0	0	0		8.90189e-05	0.399261	-2.50463	ARF2sm-42R down vs wt-42G	0	0	0
Solyc03g117060.2		ARF2sm-42R vs wt-42G diff			ARF2sm-42R down vs wt-42G		ARF2sm-42R down vs wt-42G	60S ribosomal protein L7-like protein (AHRD V1 ***- B3TM16_ELAGV)%3B contains Interpro	at1g80750.1	| symbols: | ribosomal protein l30/l7 family protein | chr1:30349052-30350434 forward l	Solyc03g117060.2.1	SL2.40ch03	60374016	60378796	TGS1323	97.638	60673248	TGS0964	94.9	60355654	\N	\N	\N	\N	protein homodimerization activity	GO:0042803	#N/A	#N/A	Solyc03g117060.2	0	0	0		0.000980338	0.485978	-2.05771	ARF2sm-42R down vs wt-42G	0	0	0
Solyc03g117180.2		ARF2sm-42R vs wt-42G diff			ARF2sm-42R down vs wt-42G		ARF2sm-42R down vs wt-42G	Serine/threonine-protein kinase (AHRD V1 **** C6ZRV0_SOYBN)%3B contains Interpro domain	at2g25220.1	| symbols: | protein kinase superfamily protein | chr2:10742918-10745540 reverse length	Solyc03g117180.2.1	SL2.40ch03	60444590	60448232	TGS1323	97.638	60673248	TGS0964	94.9	60355654	\N	\N	\N	\N	protein serine/threonine kinase activity protein binding	GO:0004674 GO:0005515	NA	Serine/threonine-protein kinase	Solyc03g117180.2	0	0	0		0.00113002	0.439731	-2.27412	ARF2sm-42R down vs wt-42G	0	0	0
Solyc03g117510.2		ARF2sm-42R vs wt-42G diff			ARF2sm-42R down vs wt-42G		ARF2sm-42R down vs wt-42G	Formamidopyrimidine-DNA glycosylase (AHRD V1 **** C5JTH8_AJEDS)%3B contains Interpro do	at1g52500.2	| symbols: fpg-1 atfpg-1 atmmh-1 mmh-1 | mutm homolog-1 | chr1:19560043-19562855 for	Solyc03g117510.2.1	SL2.40ch03	60702450	60707474	TGS0207	96.573	60740537	TGS1323	97.638	60673248	\N	\N	\N	\N	DNA N-glycosylase activity	GO:0019104	NA	MUTM homolog-1	Solyc03g117510.2	0	0	0		0.00524226	0.43086	-2.32094	ARF2sm-42R down vs wt-42G	0	0	0
Solyc03g119320.1		ARF2sm-42R vs wt-42G diff			ARF2sm-42R down vs wt-42G		ARF2sm-42R down vs wt-42G	At1g67050 (Fragment) (AHRD V1 ***- B0FU30_ARATH)	at1g67050.1	| symbols: | unknown protein best arabidopsis thaliana protein match is: unknown prote	Solyc03g119320.1.1	SL2.40ch03	62016429	62017130	TGS2504	113.857	62066647	TES1874	108.37	61945007	\N	\N	\N	\N	\N	\N	#N/A	#N/A	Solyc03g119320.1	0	0	0		0.00086008	0.479459	-2.08569	ARF2sm-42R down vs wt-42G	0	0	0
Solyc03g120290.2		ARF2sm-42R vs wt-42G diff			ARF2sm-42R down vs wt-42G		ARF2sm-42R down vs wt-42G	Unknown Protein (AHRD V1)	at1g12663.1	| symbols: | predicted to encode a pr (pathogenesis-related) protein. belongs to the pl	Solyc03g120290.2.1	SL2.40ch03	62783284	62784312	cLET-5-F17	117.006	62912589	TES1026	112.666	62538280	\N	\N	\N	\N	\N	\N	#N/A	#N/A	Solyc03g120290.2	0	0	0		0.00475131	0.168991	-5.91749	ARF2sm-42R down vs wt-42G	0	0	0
Solyc03g120500.2		ARF2sm-42R vs wt-42G diff			ARF2sm-42R down vs wt-42G		ARF2sm-42R down vs wt-42G	Auxin responsive protein (AHRD V1 ***- D9IQE6_CATRO)%3B contains Interpro domain(s) IP	at4g29080.1	| symbols: pap2 iaa27 | phytochrome-associated protein 2 | chr4:14323665-14325213 reve	Solyc03g120500.2.1	SL2.40ch03	62930712	62932827	TES0023	123.264	63216450	cLET-5-F17	117.006	62912589	\N	\N	\N	\N	sequence-specific DNA binding transcription factor activity protein binding	GO:0003700 GO:0005515	#N/A	#N/A	Solyc03g120500.2	0	0	0		0.00932102	0.229241	-4.36223	ARF2sm-42R down vs wt-42G	0	0	0
Solyc03g120680.2		ARF2sm-42R vs wt-42G diff			ARF2sm-42R down vs wt-42G		ARF2sm-42R down vs wt-42G	Glyoxylate reductase (AHRD V1 **** B6TL24_MAIZE)%3B contains Interpro domain(s) IPR006	at1g79870.1	| symbols: | d-isomer specific 2-hydroxyacid dehydrogenase family protein | chr1:300447	Solyc03g120680.2.1	SL2.40ch03	63041368	63043912	TES0023	123.264	63216450	TES0221	118.802	62931852	\N	\N	\N	\N	glyoxylate reductase activity	GO:0047964	NA	Glyoxylate reductase	Solyc03g120680.2	0	0	0		0.00607057	0.294271	-3.39823	ARF2sm-42R down vs wt-42G	0	0	0
Solyc03g121050.2		ARF2sm-42R vs wt-42G diff			ARF2sm-42R down vs wt-42G		ARF2sm-42R down vs wt-42G	Receptor-like kinase (AHRD V1 *-*- C0SW32_SOYBN)%3B contains Interpro domain(s) IPR002	at1g51940.1	| symbols: | protein kinase family protein / peptidoglycan-binding lysm domain-containi	Solyc03g121050.2.1	SL2.40ch03	63329506	63336332	T1143	124.126	63410085	TES0835	123.545	63293888	protein phosphorylation cell wall macromolecule catabolic process	GO:0006468 GO:0016998	\N	\N	\N	\N	NA	protein kinase family protein / peptidoglycan-binding LysM domain-containing protein	Solyc03g121050.2	0	0	0		0.000897563	0.365012	-2.73964	ARF2sm-42R down vs wt-42G	0	0	0
Solyc03g121070.2		ARF2sm-42R vs wt-42G diff			ARF2sm-42R down vs wt-42G		ARF2sm-42R down vs wt-42G	Hexokinase (AHRD V1 ***- Q8H0Q2_SOLLC)%3B contains Interpro domain(s) IPR019807 Hexok	at4g29130.1	| symbols: athxk1 gin2 hxk1 | hexokinase 1 | chr4:14352338-14354865 reverse length=49	Solyc03g121070.2.1	SL2.40ch03	63353339	63358640	T1143	124.126	63410085	TES0835	123.545	63293888	\N	\N	\N	\N	glucokinase activity	GO:0004340	glycolysis III	Hexokinase	Solyc03g121070.2	0	0	0		0.00939599	0.325082	-3.07615	ARF2sm-42R down vs wt-42G	0	0	0
Solyc03g122190.2		ARF2sm-42R vs wt-42G diff			ARF2sm-42R down vs wt-42G		ARF2sm-42R down vs wt-42G	Jasmonate ZIM domain 2 (AHRD V1 **-- C7SCY2_CATRO)%3B contains Interpro domain(s) IPR0	at1g74950.1	| symbols: jaz2 tify10b | tify domain/divergent cct motif family protein | chr1:281489	Solyc03g122190.2.1	SL2.40ch03	64155650	64158036	tme0062	131.964	64427061	TG549	130.94	64123380	\N	\N	\N	\N	protein binding	GO:0005515	#N/A	#N/A	Solyc03g122190.2	0	0	0		0.00854046	0.223004	-4.48422	ARF2sm-42R down vs wt-42G	0	0	0
Solyc03g123860.2		ARF2sm-42R vs wt-42G diff			ARF2sm-42R down vs wt-42G		ARF2sm-42R down vs wt-42G	Receptor like kinase%2C RLK	at1g73080.1	| symbols: pepr1 atpepr1 | pep1 receptor 1 | chr1:27484513-27488021 forward length=112	Solyc03g123860.2.1	SL2.40ch03	64604414	64608013	C2_At5g49830	133.514	64610911	tme0062	131.964	64427061	\N	\N	\N	\N	peptide receptor activity	GO:0001653	NA	Receptor-like protein kinase	Solyc03g123860.2	0	0	0		0.00274762	0.142945	-6.99568	ARF2sm-42R down vs wt-42G	0	0	0
Solyc03g124040.2		ARF2sm-42R vs wt-42G diff			ARF2sm-42R down vs wt-42G		ARF2sm-42R down vs wt-42G	Mitochondrial transcription termination factor (Fragment) (AHRD V1 *--- C6FB10_PSEMZ)%3	at1g78930.1	| symbols: | mitochondrial transcription termination factor family protein | chr1:29678	Solyc03g124040.2.1	SL2.40ch03	64802905	64811982	\NA	\NA	\NA	TG244	137.457	64733620	\N	\N	\N	\N	\N	\N	#N/A	#N/A	Solyc03g124040.2	0	0	0		6.35202e-06	0.458104	-2.18291	ARF2sm-42R down vs wt-42G	0	0	0
Solyc04g005180.2		ARF2sm-42R vs wt-42G diff			ARF2sm-42R down vs wt-42G		ARF2sm-42R down vs wt-42G	2-oxoglutarate decarboxylase/ hydro-lyase/ magnesium ion binding protein (AHRD V1 **--													\N	\N	\N	\N	\N	\N	1,4-dihydroxy-2-naphthoate biosynthesis I	Protein PHYLLO, chloroplastic	Solyc04g005180.2	0	0	0		0.0016581	0.344982	-2.8987	ARF2sm-42R down vs wt-42G	0	0	0
Solyc04g005190.2		ARF2sm-42R vs wt-42G diff			ARF2sm-42R down vs wt-42G		ARF2sm-42R down vs wt-42G	2-succinyl-5-enolpyruvyl-6-hydroxy-3-cyclohexene-1-carboxylate synthase (AHRD V1 *-*- D	at1g68890.1	| symbols: | magnesium ion binding thiamin pyrophosphate binding hydro-lyases catalytic	Solyc04g005190.2.1	SL2.40ch04	130395	145641	TES0030	2.258	1208973	\NA	\NA	\NA	menaquinone biosynthetic process cellular amino acid catabolic process	GO:0009234 GO:0009063	\N	\N	\N	\N	1,4-dihydroxy-2-naphthoate biosynthesis I	Protein PHYLLO, chloroplastic	Solyc04g005190.2	0	0	0		0.000338669	0.40235	-2.4854	ARF2sm-42R down vs wt-42G	0	0	0
Solyc04g005340.2		ARF2sm-42R vs wt-42G diff			ARF2sm-42R down vs wt-42G		ARF2sm-42R down vs wt-42G	Alpha-1 4-glucan protein synthase (AHRD V1 **-* Q8H8T0_ORYSJ)%3B contains Interpro doma	at3g02230.1	| symbols: rgp1 atrgp1 | reversibly glycosylated polypeptide 1 | chr3:415463-417304 fo	Solyc04g005340.2.1	SL2.40ch04	248903	251735	TES0030	2.258	1208973	\NA	\NA	\NA	\N	\N	\N	\N	cellulose synthase (UDP-forming) activity	GO:0016760	cellulose biosynthesis	cellulose synthase (UDP-forming)	Solyc04g005340.2	0	0	0		3.26835e-05	0.495458	-2.01834	ARF2sm-42R down vs wt-42G	0	0	0
Solyc04g007410.2		ARF2sm-42R vs wt-42G diff			ARF2sm-42R down vs wt-42G		ARF2sm-42R down vs wt-42G	Os06g0731300 protein (Fragment) (AHRD V1 *-*- Q0D996_ORYSJ)	at3g45050.3	| symbols: | unknown protein functions in: molecular_function unknown involved in: bi	Solyc04g007410.2.1	SL2.40ch04	1091223	1093103	TES0030	2.258	1208973	\NA	\NA	\NA	\N	\N	\N	\N	\N	\N	#N/A	#N/A	Solyc04g007410.2	0	0	0		0.000528474	0.410375	-2.4368	ARF2sm-42R down vs wt-42G	0	0	0
Solyc04g007500.1		ARF2sm-42R vs wt-42G diff			ARF2sm-42R down vs wt-42G		ARF2sm-42R down vs wt-42G	RING finger protein (AHRD V1 ***- Q22V07_TETTH)%3B contains Interpro domain(s) IPR0189	at1g15100.1	| symbols: rha2a | ring-h2 finger a2a | chr1:5193703-5194170 reverse length=155 | symbo	Solyc04g007500.1.1	SL2.40ch04	1170448	1170939	TES0030	2.258	1208973	\NA	\NA	\NA	\N	\N	\N	\N	protein binding ubiquitin-protein ligase activity	GO:0005515 GO:0004842	NA	ubiquitin-protein ligase	Solyc04g007500.1	0	0	0		0.00914601	0.293463	-3.40759	ARF2sm-42R down vs wt-42G	0	0	0
Solyc04g009420.2		ARF2sm-42R vs wt-42G diff			ARF2sm-42R down vs wt-42G		ARF2sm-42R down vs wt-42G	Photosystem II oxygen evolving complex protein PsbP (AHRD V1 ***- Q11A16_TRIEI)%3B cont	at2g28605.1	| symbols: | photosystem ii reaction center psbp family protein | chr2:12254911-1225568	Solyc04g009420.2.1	SL2.40ch04	2840496	2842762	TES1023	19.886	2958114	T741	16.474	2803132	\N	\N	extrinsic to membrane	GO:0019898	\N	\N	#N/A	#N/A	Solyc04g009420.2	0	0	0		0.00124665	0.401404	-2.49125	ARF2sm-42R down vs wt-42G	0	0	0
Solyc04g014530.1		ARF2sm-42R vs wt-42G diff			ARF2sm-42R down vs wt-42G		ARF2sm-42R down vs wt-42G	Ethylene responsive transcription factor 1a (AHRD V1 *-*- C0J9I9_9ROSA)%3B contains Int	at3g23240.1	| symbols: erf1 aterf1 | ethylene response factor 1 | chr3:8295705-8296361 forward len	Solyc04g014530.1.1	SL2.40ch04	4802150	4802851	TES1141	29.566	4960482	TES0177	27.946	4561450	regulation of transcription, DNA-dependent	GO:0006355	\N	\N	DNA binding	GO:0003677	#N/A	#N/A	Solyc04g014530.1	0	0	0		0.00645121	0.298795	-3.34678	ARF2sm-42R down vs wt-42G	0	0	0
Solyc04g014740.1		ARF2sm-42R vs wt-42G diff			ARF2sm-42R down vs wt-42G		ARF2sm-42R down vs wt-42G	Bcl-2-associated athanogene-like protein (AHRD V1 *-*- D1MIX4_VITVI)%3B contains Interp	at1g12060.1	| symbols: atbag5 bag5 | bcl-2-associated athanogene 5 | chr1:4076334-4076981 forward	Solyc04g014740.1.1	SL2.40ch04	5000220	5000519	T891	38.81	5477845	TES1141	29.566	4960482	apoptosis	GO:0006915	\N	\N	\N	\N	#N/A	#N/A	Solyc04g014740.1	0	0	0		0.00181806	0.34108	-2.93186	ARF2sm-42R down vs wt-42G	0	0	0
Solyc04g017750.2		ARF2sm-42R vs wt-42G diff			ARF2sm-42R down vs wt-42G		ARF2sm-42R down vs wt-42G	Pathogen-induced calmodulin-binding protein (Fragment) (AHRD V1 *--- Q8H6W8_PHAVU)%3B c	at5g04020.1	| symbols: | calmodulin binding | chr5:1081980-1086546 reverse length=1495 | symbols: |	Solyc04g017750.2.1	SL2.40ch04	7961924	7966482	tma0303	37.614	8336522	TGS2944	37.651	7185572	\N	\N	\N	\N	\N	\N	#N/A	#N/A	Solyc04g017750.2	0	0	0		0.00141899	0.472732	-2.11536	ARF2sm-42R down vs wt-42G	0	0	0
Solyc04g047850.1		ARF2sm-42R vs wt-42G diff			ARF2sm-42R down vs wt-42G		ARF2sm-42R down vs wt-42G	Unknown Protein (AHRD V1)	none	none	Solyc04g047850.1.1	SL2.40ch04	37158733	37159378	TGS2238	35.416	39124075	TGS0442	37.651	34515853	\N	\N	\N	\N	\N	\N	#N/A	#N/A	Solyc04g047850.1	0	0	0		0.00198692	0.280332	-3.56719	ARF2sm-42R down vs wt-42G	0	0	0
Solyc04g053080.2		ARF2sm-42R vs wt-42G diff			ARF2sm-42R down vs wt-42G		ARF2sm-42R down vs wt-42G	OTU domain-containing protein 6B (AHRD V1 ***- B6TYC6_MAIZE)%3B contains Interpro domai	at3g62940.3	| symbols: | cysteine proteinases superfamily protein | chr3:23263106-23264245 reverse	Solyc04g053080.2.1	SL2.40ch04	50582502	50584310	TGS2016	38.509	50726925	TGS2495	37.728	50325296	\N	\N	\N	\N	cysteine-type peptidase activity	GO:0008234	#N/A	#N/A	Solyc04g053080.2	0	0	0		5.66251e-05	0.420767	-2.37661	ARF2sm-42R down vs wt-42G	0	0	0
Solyc04g057940.2		ARF2sm-42R vs wt-42G diff			ARF2sm-42R down vs wt-42G		ARF2sm-42R down vs wt-42G	U-box domain-containing protein (AHRD V1 *-*- B6V8G2_HELAN)%3B contains Interpro domain	at3g06880.2	| symbols: | transducin/wd40 repeat-like superfamily protein | chr3:2170516-2175686 rev	Solyc04g057940.2.1	SL2.40ch04	54202068	54208234	T877	50.486	54502141	TGS3254	43.434	53705574	\N	\N	ubiquitin ligase complex	GO:0000151	binding	GO:0005488	#N/A	#N/A	Solyc04g057940.2	0	0	0		0.0023209	0.379716	-2.63355	ARF2sm-42R down vs wt-42G	0	0	0
Solyc04g064590.1		ARF2sm-42R vs wt-42G diff			ARF2sm-42R down vs wt-42G		ARF2sm-42R down vs wt-42G	Protein kinase (AHRD V1 *-*- Q40541_TOBAC)%3B contains Interpro domain(s) IPR015748 M	at1g53570.4	| symbols: map3ka | mitogen-activated protein kinase kinase kinase 3 | chr1:19987391-19	Solyc04g064590.1.1	SL2.40ch04	54872524	54874175	TGS2760	47.895	54923109	T877	50.486	54502141	protein phosphorylation	GO:0006468	\N	\N	\N	\N	NA	Protein kinase	Solyc04g064590.1	0	0	0		0.00842611	0.292196	-3.42236	ARF2sm-42R down vs wt-42G	0	0	0
Solyc04g064620.2		ARF2sm-42R vs wt-42G diff			ARF2sm-42R down vs wt-42G		ARF2sm-42R down vs wt-42G	RAG1-activating protein 1 homolog (AHRD V1 **-- R1AP1_DROPS)%3B contains Interpro domai	at1g21460.1	| symbols: sweet1 atsweet1 | nodulin mtn3 family protein | chr1:7512030-7513281 revers	Solyc04g064620.2.1	SL2.40ch04	54912258	54914934	TGS2760	47.895	54923109	T877	50.486	54502141	\N	\N	integral to membrane	GO:0016021	\N	\N	#N/A	#N/A	Solyc04g064620.2	0	0	0		0.000607138	0.263222	-3.79907	ARF2sm-42R down vs wt-42G	0	0	0
Solyc04g064670.2		ARF2sm-42R vs wt-42G diff			ARF2sm-42R down vs wt-42G		ARF2sm-42R down vs wt-42G	Thylakoid lumenal 19 kDa protein%2C chloroplastic (AHRD V1 *-*- TL19_ARATH)%3B contains	at1g77090.1	| symbols: | mog1/psbp/duf1795-like photosystem ii reaction center psbp family protein	Solyc04g064670.2.1	SL2.40ch04	54939986	54941975	TGS3058	52.509	55027907	TGS2760	47.895	54923109	\N	\N	extrinsic to membrane	GO:0019898	\N	\N	#N/A	#N/A	Solyc04g064670.2	0	0	0		0.00127902	0.404688	-2.47104	ARF2sm-42R down vs wt-42G	0	0	0
Solyc04g071340.2		ARF2sm-42R vs wt-42G diff			ARF2sm-42R down vs wt-42G		ARF2sm-42R down vs wt-42G	Fructose-1 6-bisphosphatase class 1 (AHRD V1 **** D3PE46_DEFDS)%3B contains Interpro do	at1g43670.1	| symbols: | inositol monophosphatase family protein | chr1:16468184-16470347 forward l	Solyc04g071340.2.1	SL2.40ch04	55860635	55865238	TGS0602	51.903	56098768	T883	54.292	55663946	\N	\N	\N	\N	fructose 1,6-bisphosphate 1-phosphatase activity	GO:0042132	formaldehyde assimilation III (dihydroxyacetone cycle)	fructose-1,6-bisphosphatase	Solyc04g071340.2	0	0	0		0.00964783	0.228935	-4.36806	ARF2sm-42R down vs wt-42G	0	0	0
Solyc04g071860.2		ARF2sm-42R vs wt-42G diff			ARF2sm-42R down vs wt-42G		ARF2sm-42R down vs wt-42G	Palmitoyltransferase AKR1 (AHRD V1 *-*- AKR1_CRYNE)%3B contains Interpro domain(s) IPR	at4g24630.1	| symbols: | dhhc-type zinc finger family protein | chr4:12714919-12717111 forward leng	Solyc04g071860.2.1	SL2.40ch04	56452439	56466548	T1050	58.33	56798702	CT178	58.064	56180202	\N	\N	\N	\N	protein binding protein-cysteine S-palmitoleyltransferase activity	GO:0005515 GO:0019706	#N/A	#N/A	Solyc04g071860.2	0	0	0		0.000119919	0.398512	-2.50934	ARF2sm-42R down vs wt-42G	0	0	0
Solyc04g071900.2		ARF2sm-42R vs wt-42G diff			ARF2sm-42R down vs wt-42G		ARF2sm-42R down vs wt-42G	Peroxidase (AHRD V1 **** Q94IQ1_TOBAC)%3B contains Interpro domain(s) IPR002016 Haem	at1g71695.1	| symbols: | peroxidase superfamily protein | chr1:26964359-26966557 forward length=358	Solyc04g071900.2.1	SL2.40ch04	56513280	56516291	T1050	58.33	56798702	CT178	58.064	56180202	\N	\N	\N	\N	peroxidase activity	GO:0004601	betanidin degradation	Peroxidase	Solyc04g071900.2	0	0	0		0.00291521	0.179959	-5.55682	ARF2sm-42R down vs wt-42G	0	0	0
Solyc04g072460.2		ARF2sm-42R vs wt-42G diff			ARF2sm-42R down vs wt-42G		ARF2sm-42R down vs wt-42G	BZIP transcription factor (AHRD V1 **** A7Y1S1_BRAJU)%3B contains Interpro domain(s) I	at5g65210.5	| symbols: tga1 | bzip transcription factor family protein | chr5:26059031-26060749 for	Solyc04g072460.2.1	SL2.40ch04	57075743	57078562	TES0310	60.761	57176897	TES1709	57.361	56936403	\N	\N	\N	\N	sequence-specific DNA binding transcription factor activity	GO:0003700	#N/A	#N/A	Solyc04g072460.2	0	0	0		0.00181315	0.341275	-2.93019	ARF2sm-42R down vs wt-42G	0	0	0
Solyc04g072630.2		ARF2sm-42R vs wt-42G diff			ARF2sm-42R down vs wt-42G		ARF2sm-42R down vs wt-42G	Os10g0363700 protein (Fragment) (AHRD V1 *-*- Q0IY59_ORYSJ)	at1g22060.1	| symbols: | located in: vacuole expressed in: 23 plant structures expressed during:	Solyc04g072630.2.1	SL2.40ch04	57188492	57198522	TES0287	69.722	57351140	TES1210	61.346	57179430	\N	\N	\N	\N	\N	\N	#N/A	#N/A	Solyc04g072630.2	0	0	0		0.000827575	0.476934	-2.09672	ARF2sm-42R down vs wt-42G	0	0	0
Solyc04g076340.2		ARF2sm-42R vs wt-42G diff			ARF2sm-42R down vs wt-42G		ARF2sm-42R down vs wt-42G	Unknown Protein (AHRD V1)	at4g38060.2	| symbols: | unknown protein best arabidopsis thaliana protein match is: unknown prote	Solyc04g076340.2.1	SL2.40ch04	58850229	58852842	TES0582	74.28	59015158	P56	72.345	58798309	\N	\N	\N	\N	\N	\N	#N/A	#N/A	Solyc04g076340.2	0	0	0		0.00512349	0.369664	-2.70516	ARF2sm-42R down vs wt-42G	0	0	0
Solyc04g077480.2		ARF2sm-42R vs wt-42G diff			ARF2sm-42R down vs wt-42G		ARF2sm-42R down vs wt-42G	Transcription factor (AHRD V1 *-** D6MKM4_9ASPA)%3B contains Interpro domain(s) IPR011	at1g10120.1	| symbols: | basic helix-loop-helix (bhlh) dna-binding superfamily protein | chr1:33042	Solyc04g077480.2.1	SL2.40ch04	59989923	59993699	T769	81.745	60040944	TES1364	81.073	59895880	\N	\N	\N	\N	sequence-specific DNA binding transcription factor activity	GO:0003700	#N/A	#N/A	Solyc04g077480.2	0	0	0		0.00405931	0.464236	-2.15408	ARF2sm-42R down vs wt-42G	0	0	0
Solyc04g078670.2		ARF2sm-42R vs wt-42G diff			ARF2sm-42R down vs wt-42G		ARF2sm-42R down vs wt-42G	NAC domain transcription factor (AHRD V1 **** Q5DM35_WHEAT)%3B contains Interpro domain	at3g44290.1	| symbols: anac060 nac060 | nac domain containing protein 60 | chr3:15972909-15975019	Solyc04g078670.2.1	SL2.40ch04	60958460	60960829	CT50	89.217	61009192	TGS2730	91.917	60927848	\N	\N	\N	\N	sequence-specific DNA binding transcription factor activity	GO:0003700	#N/A	#N/A	Solyc04g078670.2	0	0	0		0.00627561	0.488262	-2.04808	ARF2sm-42R down vs wt-42G	0	0	0
Solyc04g079060.2		ARF2sm-42R vs wt-42G diff			ARF2sm-42R down vs wt-42G		ARF2sm-42R down vs wt-42G	Serine carboxypeptidase 1 (AHRD V1 ***- B6TC80_MAIZE)%3B contains Interpro domain(s) I	at2g22980.1	| symbols: scpl13 | serine carboxypeptidase-like 13 | chr2:9779029-9783078 forward leng	Solyc04g079060.2.1	SL2.40ch04	61237392	61243739	TG443	95.421	61414081	TGS1157	90.883	61030085	\N	\N	\N	\N	sinapoylglucose-malate O-sinapoyltransferase activity	GO:0016754	NA	sinapoylglucose-malate O-sinapoyltransferase	Solyc04g079060.2	0	0	0		0.00289189	0.384426	-2.60128	ARF2sm-42R down vs wt-42G	0	0	0
Solyc04g079900.2		ARF2sm-42R vs wt-42G diff			ARF2sm-42R down vs wt-42G		ARF2sm-42R down vs wt-42G	GP63 leishmanolysin (Metallo-peptidase clan ma(M) family m8) (AHRD V1 *--- A4H637_LEIBR	at5g42620.2	| symbols: | metalloendopeptidases zinc ion binding | chr5:17066630-17071766 forward le	Solyc04g079900.2.1	SL2.40ch04	61800538	61808304	TES1100	101.896	61855425	T974	100.457	61683988	\N	\N	membrane	GO:0016020	\N	\N	#N/A	#N/A	Solyc04g079900.2	0	0	0		0.00357687	0.255594	-3.91246	ARF2sm-42R down vs wt-42G	0	0	0
Solyc04g079980.2		ARF2sm-42R vs wt-42G diff			ARF2sm-42R down vs wt-42G		ARF2sm-42R down vs wt-42G	BES1/BZR1 homolog protein 2 (AHRD V1 **-- BEH2_ARATH)%3B contains Interpro domain(s) I	at1g75080.2	| symbols: bzr1 | brassinosteroid signalling positive regulator (bzr1) family protein |	Solyc04g079980.2.1	SL2.40ch04	61883229	61885254	TM13	102.872	61968226	TEI0491	102.395	61880457	\N	\N	\N	\N	sequence-specific DNA binding transcription factor activity	GO:0003700	#N/A	#N/A	Solyc04g079980.2	0	0	0		0.00430517	0.435799	-2.29463	ARF2sm-42R down vs wt-42G	0	0	0
Solyc04g080030.2		ARF2sm-42R vs wt-42G diff			ARF2sm-42R down vs wt-42G		ARF2sm-42R down vs wt-42G	PPPDE peptidase domain-containing protein 1 (AHRD V1 **-- PPDE1_XENLA)%3B contains Inte	at1g47740.2	| symbols: | pppde putative thiol peptidase family protein | chr1:17567903-17569035 for	Solyc04g080030.2.1	SL2.40ch04	61915022	61918270	TM13	102.872	61968226	TEI0491	102.395	61880457	\N	\N	\N	\N	\N	\N	#N/A	#N/A	Solyc04g080030.2	0	0	0		0.00555733	0.259717	-3.85035	ARF2sm-42R down vs wt-42G	0	0	0
Solyc05g006570.1		ARF2sm-42R vs wt-42G diff			ARF2sm-42R down vs wt-42G		ARF2sm-42R down vs wt-42G	Receptor like kinase%2C RLK Receptor like kinase%2C RLK	at1g27190.1	| symbols: | leucine-rich repeat protein kinase family protein | chr1:9446923-9448728 r	Solyc05g006570.1.1	SL2.40ch05	1207083	1208915	TES0363	15.307	1540417	TEI0177	9.604	1041368	\N	\N	\N	\N	protein binding protein serine/threonine kinase activity	GO:0005515 GO:0004674	#N/A	#N/A	Solyc05g006570.1	0	0	0		0.00951232	0.459961	-2.1741	ARF2sm-42R down vs wt-42G	0	0	0
Solyc05g006740.2		ARF2sm-42R vs wt-42G diff			ARF2sm-42R down vs wt-42G		ARF2sm-42R down vs wt-42G	Glutathione S-transferase (AHRD V1 **** A3FF38_9CARY)%3B contains Interpro domain(s) I	at1g10370.1	| symbols: gst30 atgstu17 gst30b erd9 | glutathione s-transferase family protein | c	Solyc05g006740.2.1	SL2.40ch05	1379095	1381005	TES0363	15.307	1540417	TEI0177	9.604	1041368	\N	\N	\N	\N	glutathione transferase activity	GO:0004364	glutathione-mediated detoxification	Glutathione S-transferase	Solyc05g006740.2	0	0	0		0.00225433	0.111058	-9.00427	ARF2sm-42R down vs wt-42G	0	0	0
Solyc05g006770.2		ARF2sm-42R vs wt-42G diff			ARF2sm-42R down vs wt-42G		ARF2sm-42R down vs wt-42G	Kinase family protein (AHRD V1 *-*- D7MVR5_ARALY)	at1g69910.1	| symbols: | protein kinase superfamily protein | chr1:26330166-26332076 forward length	Solyc05g006770.2.1	SL2.40ch05	1391932	1394125	TES0363	15.307	1540417	TEI0177	9.604	1041368	\N	\N	\N	\N	\N	\N	#N/A	#N/A	Solyc05g006770.2	0	0	0		0.00604144	0.47772	-2.09327	ARF2sm-42R down vs wt-42G	0	0	0
Solyc05g007160.2		ARF2sm-42R vs wt-42G diff			ARF2sm-42R down vs wt-42G		ARF2sm-42R down vs wt-42G	Transcription factor C-MYB (AHRD V1 *-** Q766Z9_ORYLA)%3B contains Interpro domain(s)	at2g02820.2	| symbols: myb88 | myb domain protein 88 | chr2:804716-807139 reverse length=484	Solyc05g007160.2.1	SL2.40ch05	1752928	1757049	TES0261	19.681	1798292	T1592	17.003	1653185	\N	\N	\N	\N	sequence-specific DNA binding transcription factor activity	GO:0003700	#N/A	#N/A	Solyc05g007160.2	0	0	0		0.0018112	0.211325	-4.73205	ARF2sm-42R down vs wt-42G	0	0	0
Solyc05g007430.2		ARF2sm-42R vs wt-42G diff			ARF2sm-42R down vs wt-42G		ARF2sm-42R down vs wt-42G	Os11g0198100 protein (Fragment) (AHRD V1 *-*- Q0IU20_ORYSJ)%3B contains Interpro domain	at2g02910.1	| symbols: | protein of unknown function (duf616) | chr2:847335-849371 reverse length=4	Solyc05g007430.2.1	SL2.40ch05	2009889	2015144	TES0053	25.667	2164093	TGS2385	22.611	2005592	\N	\N	\N	\N	\N	\N	#N/A	#N/A	Solyc05g007430.2	0	0	0		0.00377587	0.465755	-2.14705	ARF2sm-42R down vs wt-42G	0	0	0
Solyc05g007830.2		ARF2sm-42R vs wt-42G diff			ARF2sm-42R down vs wt-42G		ARF2sm-42R down vs wt-42G	Expansin 2 (AHRD V1 ***- Q9FUM2_PRUAV)%3B contains Interpro domain(s) IPR002963 Expan	at1g69530.2	| symbols: atexpa1 exp1 at-exp1 atexp1 athexp alpha 1.2 expa1 | expansin a1 | chr1	Solyc05g007830.2.1	SL2.40ch05	2281207	2283177	TGS1457	31.477	2300661	TES1224	28.653	2247160	\N	\N	\N	\N	structural constituent of cell wall	GO:0005199	#N/A	#N/A	Solyc05g007830.2	0	0	0		0.00447319	0.35996	-2.77809	ARF2sm-42R down vs wt-42G	0	0	0
Solyc05g007880.2		ARF2sm-42R vs wt-42G diff			ARF2sm-42R down vs wt-42G		ARF2sm-42R down vs wt-42G	Dof zinc finger protein (AHRD V1 ***- C4B6D7_IPOBA)%3B contains Interpro domain(s) IPR	at5g39660.2	| symbols: cdf2 | cycling dof factor 2 | chr5:15878920-15880712 forward length=457 | sy	Solyc05g007880.2.1	SL2.40ch05	2319572	2322236	TES0012	32.87	2615675	TGS1457	31.477	2300661	\N	\N	\N	\N	protein binding sequence-specific DNA binding transcription factor activity	GO:0005515 GO:0003700	#N/A	#N/A	Solyc05g007880.2	0	0	0		0.00557366	0.337915	-2.95933	ARF2sm-42R down vs wt-42G	0	0	0
Solyc05g008350.2		ARF2sm-42R vs wt-42G diff			ARF2sm-42R down vs wt-42G		ARF2sm-42R down vs wt-42G	ABC transporter G family member 7 (AHRD V1 **** AB7G_ARATH)%3B contains Interpro domain	at2g01320.1	| symbols: | abc-2 type transporter family protein | chr2:154669-158063 reverse length=	Solyc05g008350.2.1	SL2.40ch05	2707862	2717543	SSR115	36.668	2732513	CT167	34.521	2673700	\N	\N	\N	\N	cholesterol transporter activity	GO:0017127	NA	ABC transporter G family member 7	Solyc05g008350.2	0	0	0		0.000581273	0.396463	-2.5223	ARF2sm-42R down vs wt-42G	0	0	0
Solyc05g009610.1		ARF2sm-42R vs wt-42G diff			ARF2sm-42R down vs wt-42G		ARF2sm-42R down vs wt-42G	Acetyl esterase (AHRD V1 **-- AES_SHIF8)%3B contains Interpro domain(s) IPR013094 Alp	at1g68620.1	| symbols: | alpha/beta-hydrolases superfamily protein | chr1:25766018-25767028 forward	Solyc05g009610.1.1	SL2.40ch05	3812036	3813073	TES0151	47.911	3887966	CD64	48.471	3739422	metabolic process	GO:0008152	\N	\N	\N	\N	NA	Acetyl esterase	Solyc05g009610.1	0	0	0		0.00446496	0.426862	-2.34268	ARF2sm-42R down vs wt-42G	0	0	0
Solyc05g009670.2		ARF2sm-42R vs wt-42G diff			ARF2sm-42R down vs wt-42G		ARF2sm-42R down vs wt-42G	Choline transporter-like protein (AHRD V1 **-- Q6EP45_ORYSJ)%3B contains Interpro domai	at1g25500.2	| symbols: | plasma-membrane choline transporter family protein | chr1:8955437-8957793	Solyc05g009670.2.1	SL2.40ch05	3865942	3872602	TES0151	47.911	3887966	CD64	48.471	3739422	\N	\N	\N	\N	\N	\N	#N/A	#N/A	Solyc05g009670.2	0	0	0		0.00487736	0.406934	-2.4574	ARF2sm-42R down vs wt-42G	0	0	0
Solyc05g013410.2		ARF2sm-42R vs wt-42G diff			ARF2sm-42R down vs wt-42G		ARF2sm-42R down vs wt-42G	Sel1 domain protein repeat-containing protein (AHRD V1 *-*- A0L961_MAGSM)%3B contains I	at1g70590.1	| symbols: | f-box family protein | chr1:26618403-26620159 forward length=351	Solyc05g013410.2.1	SL2.40ch05	6480260	6484488	T40	77.968	7498030	TGS3224	73.38	6306353	\N	\N	\N	\N	binding	GO:0005488	#N/A	#N/A	Solyc05g013410.2	0	0	0		0.00217832	0.266401	-3.75374	ARF2sm-42R down vs wt-42G	0	0	0
Solyc05g015070.2		ARF2sm-42R vs wt-42G diff			ARF2sm-42R down vs wt-42G		ARF2sm-42R down vs wt-42G	U-box domain-containing protein (AHRD V1 ***- D7KBV1_ARALY)%3B contains Interpro domain	at1g27910.1	| symbols: pub45 atpub45 | plant u-box 45 | chr1:9720962-9723975 reverse length=768 |	Solyc05g015070.2.1	SL2.40ch05	9775132	9780790	TG504	80.949	10065276	TGS3302	81.405	9299141	\N	\N	\N	\N	ubiquitin-protein ligase activity protein binding	GO:0004842 GO:0005515	NA	ubiquitin-protein ligase	Solyc05g015070.2	0	0	0		0.00398344	0.411655	-2.42922	ARF2sm-42R down vs wt-42G	0	0	0
Solyc05g015760.1		ARF2sm-42R vs wt-42G diff			ARF2sm-42R down vs wt-42G		ARF2sm-42R down vs wt-42G	Unknown Protein (AHRD V1)													\N	\N	\N	\N	\N	\N	#N/A	#N/A	Solyc05g015760.1	0	0	0		0.00238496	0.185527	-5.39005	ARF2sm-42R down vs wt-42G	0	0	0
Solyc05g016030.2		ARF2sm-42R vs wt-42G diff			ARF2sm-42R down vs wt-42G		ARF2sm-42R down vs wt-42G	Palmitoyltransferase erf2 (AHRD V1 *-*- C1GFP3_PARBD)%3B contains Interpro domain(s) I	at4g15080.1	| symbols: | dhhc-type zinc finger family protein | chr4:8609085-8612229 reverse length	Solyc05g016030.2.1	SL2.40ch05	13610807	13620126	TGS0669	79.888	13748283	TGS1544	80.374	13350396	\N	\N	\N	\N	protein binding	GO:0005515	#N/A	#N/A	Solyc05g016030.2	0	0	0		0.00134799	0.459691	-2.17537	ARF2sm-42R down vs wt-42G	0	0	0
Solyc05g050630.2		ARF2sm-42R vs wt-42G diff			ARF2sm-42R down vs wt-42G		ARF2sm-42R down vs wt-42G	Protein TIF31 homolog (AHRD V1 *--- TIF31_ASPOR)%3B contains Interpro domain(s) IPR011	at1g01320.2	| symbols: | tetratricopeptide repeat (tpr)-like superfamily protein | chr1:121582-1300	Solyc05g050630.2.1	SL2.40ch05	59912099	59932213	TGS0914	78.729	60218721	TES1318	87.396	59827092	\N	\N	\N	\N	binding	GO:0005488	#N/A	#N/A	Solyc05g050630.2	0	0	0		0.00122676	0.46059	-2.17113	ARF2sm-42R down vs wt-42G	0	0	0
Solyc05g052500.2		ARF2sm-42R vs wt-42G diff			ARF2sm-42R down vs wt-42G		ARF2sm-42R down vs wt-42G	Dehydration-responsive family protein (AHRD V1 **-- D7LF23_ARALY)%3B contains Interpro	at2g40280.1	| symbols: | s-adenosyl-l-methionine-dependent methyltransferases superfamily protein |	Solyc05g052500.2.1	SL2.40ch05	61857465	61864807	CT172	107.488	62108681	T1746	97.215	61708360	\N	\N	\N	\N	\N	\N	#N/A	#N/A	Solyc05g052500.2	0	0	0		0.000845988	0.477985	-2.09212	ARF2sm-42R down vs wt-42G	0	0	0
Solyc05g052780.2		ARF2sm-42R vs wt-42G diff			ARF2sm-42R down vs wt-42G		ARF2sm-42R down vs wt-42G	LIM domain protein (AHRD V1 **-- Q8VWW1_GOSHI)%3B contains Interpro domain(s) IPR00178	at3g55770.5	| symbols: | gata type zinc finger transcription factor family protein | chr3:20703799-	Solyc05g052780.2.1	SL2.40ch05	62108501	62112460	TES0674	110.195	62296236	T1746	97.215	61708360	\N	\N	\N	\N	calcium channel regulator activity identical protein binding	GO:0005246 GO:0042802	#N/A	#N/A	Solyc05g052780.2	0	0	0		0.00134541	0.49946	-2.00216	ARF2sm-42R down vs wt-42G	0	0	0
Solyc05g053070.2		ARF2sm-42R vs wt-42G diff			ARF2sm-42R down vs wt-42G		ARF2sm-42R down vs wt-42G	Unknown Protein (AHRD V1)													\N	\N	\N	\N	\N	\N	#N/A	#N/A	Solyc05g053070.2	0	0	0		0.00574811	0.349684	-2.85972	ARF2sm-42R down vs wt-42G	0	0	0
Solyc05g053100.2		ARF2sm-42R vs wt-42G diff			ARF2sm-42R down vs wt-42G		ARF2sm-42R down vs wt-42G	Dihydrolipoyl dehydrogenase (AHRD V1 ***- B9RZN2_RICCO)%3B contains Interpro domain(s)	at3g16950.1	| symbols: lpd1 ptlpd1 | lipoamide dehydrogenase 1 | chr3:5786761-5790383 reverse leng	Solyc05g053100.2.1	SL2.40ch05	62363265	62370881	TEI0061	111.332	62495111	TES1594	112.752	62355100	\N	\N	\N	\N	DNA topoisomerase activity	GO:0003916	2-ketoglutarate dehydrogenase complex	lipoamide dehydrogenase 1	Solyc05g053100.2	0	0	0		0.00814307	0.305231	-3.2762	ARF2sm-42R down vs wt-42G	0	0	0
Solyc05g054760.2		ARF2sm-42R vs wt-42G diff			ARF2sm-42R down vs wt-42G		ARF2sm-42R down vs wt-42G	Dehydroascorbate reductase (Fragment) (AHRD V1 ***- Q1G0W3_SOLLC)%3B contains Interpro	at1g19570.1	| symbols: dhar1 atdhar1 dhar5 | dehydroascorbate reductase | chr1:6773462-6774413 re	Solyc05g054760.2.1	SL2.40ch05	63753656	63758079	TES2039	125.278	63819313	TES0099	125.752	63667711	\N	\N	\N	\N	glutathione dehydrogenase (ascorbate) activity	GO:0045174	ascorbate glutathione cycle	glutathione dehydrogenase (ascorbate)	Solyc05g054760.2	0	0	0		6.75885e-05	0.493161	-2.02774	ARF2sm-42R down vs wt-42G	0	0	0
Solyc05g055480.2		ARF2sm-42R vs wt-42G diff			ARF2sm-42R down vs wt-42G		ARF2sm-42R down vs wt-42G	NAC-domain transcription factor (AHRD V1 *-** D3WFN5_WHEAT)%3B contains Interpro domain	at3g10480.2	| symbols: anac050 nac050 | nac domain containing protein 50 | chr3:3264410-3266781 fo	Solyc05g055480.2.1	SL2.40ch05	64255495	64259429	TES1626	133.608	64426553	TG69	128.452	63918115	\N	\N	\N	\N	sequence-specific DNA binding transcription factor activity	GO:0003700	#N/A	#N/A	Solyc05g055480.2	0	0	0		0.00368309	0.461727	-2.16578	ARF2sm-42R down vs wt-42G	0	0	0
Solyc06g005710.2		ARF2sm-42R vs wt-42G diff			ARF2sm-42R down vs wt-42G		ARF2sm-42R down vs wt-42G	cDNA clone 002-143-C11 full insert sequence (AHRD V1 *--- B7F1B2_ORYSJ)%3B contains Int	at3g46780.1	| symbols: ptac16 | plastid transcriptionally active 16 | chr3:17228766-17231021 forwar	Solyc06g005710.2.1	SL2.40ch06	759915	763838	T1082	1.617	923156	\NA	\NA	\NA	metabolic process	GO:0008152	\N	\N	\N	\N	#N/A	#N/A	Solyc06g005710.2	0	0	0		9.54994e-07	0.417195	-2.39696	ARF2sm-42R down vs wt-42G	0	0	0
Solyc06g010030.2		ARF2sm-42R vs wt-42G diff			ARF2sm-42R down vs wt-42G		ARF2sm-42R down vs wt-42G	MLO-like protein 3 (AHRD V1 ***- C6EWE6_VITVI)%3B contains Interpro domain(s) IPR00432	at1g61560.1	| symbols: mlo6 atmlo6 | seven transmembrane mlo family protein | chr1:22708875-227120	Solyc06g010030.2.1	SL2.40ch06	4786764	4792828	TGS2108	10.797	4828754	TGS3509	10.797	4694332	\N	\N	integral to membrane	GO:0016021	\N	\N	#N/A	#N/A	Solyc06g010030.2	0	0	0		0.00946052	0.306716	-3.26034	ARF2sm-42R down vs wt-42G	0	0	0
Solyc06g033850.2		ARF2sm-42R vs wt-42G diff			ARF2sm-42R down vs wt-42G		ARF2sm-42R down vs wt-42G	Dehydration-responsive element-binding protein 2D (AHRD V1 *-*- DRE2D_ARATH)	at1g75490.1	| symbols: | integrase-type dna-binding superfamily protein | chr1:28336045-28336665 fo	Solyc06g033850.2.1	SL2.40ch06	19973776	19974759	cLET5A4	11.315	20391974	TGS2480	9.387	17371592	\N	\N	\N	\N	\N	\N	#N/A	#N/A	Solyc06g033850.2	0	0	0		0.00719821	0.166106	-6.02026	ARF2sm-42R down vs wt-42G	0	0	0
Solyc06g034370.1		ARF2sm-42R vs wt-42G diff			ARF2sm-42R down vs wt-42G		ARF2sm-42R down vs wt-42G	Pectinesterase (AHRD V1 ***- B9T3X5_RICCO)%3B contains Interpro domain(s) IPR006501 P	at5g62350.1	| symbols: | plant invertase/pectin methylesterase inhibitor superfamily protein | chr5	Solyc06g034370.1.1	SL2.40ch06	20869116	20869694	TG178	11.37	21040733	T244	11.339	20420931	\N	\N	\N	\N	pectinesterase activity	GO:0030599	homogalacturonan degradation	pectinesterase	Solyc06g034370.1	0	0	0		0.00246479	0.291357	-3.43222	ARF2sm-42R down vs wt-42G	0	0	0
Solyc06g050340.2		ARF2sm-42R vs wt-42G diff			ARF2sm-42R down vs wt-42G		ARF2sm-42R down vs wt-42G	Unknown Protein (AHRD V1) Unknown Protein (AHRD V1)	none	none none	Solyc06g050340.2.1	SL2.40ch06	29447412	29450966	tma0261	20.19	29619718	TES0312	17.733	28841883	\N	\N	\N	\N	\N	\N	#N/A	#N/A	Solyc06g050340.2	0	0	0		4.14801e-05	0.487545	-2.05109	ARF2sm-42R down vs wt-42G	0	0	0
Solyc06g051250.1		ARF2sm-42R vs wt-42G diff			ARF2sm-42R down vs wt-42G		ARF2sm-42R down vs wt-42G	RING finger protein (AHRD V1 *-*- C6EUD3_SOYBN)%3B contains Interpro domain(s) IPR0189	at3g11110.1	| symbols: | ring/u-box superfamily protein | chr3:3479979-3480455 forward length=158	Solyc06g051250.1.1	SL2.40ch06	30968530	30969006	TG590	28.001	31166234	TGS3083	29.054	30813568	\N	\N	\N	\N	zinc ion binding	GO:0008270	#N/A	#N/A	Solyc06g051250.1	0	0	0		0.00932544	0.469229	-2.13116	ARF2sm-42R down vs wt-42G	0	0	0
Solyc06g053140.2		ARF2sm-42R vs wt-42G diff			ARF2sm-42R down vs wt-42G		ARF2sm-42R down vs wt-42G	Senescence-associated protein DIN1 (AHRD V1 *--- B6U016_MAIZE)%3B contains Interpro dom	at4g27700.1	| symbols: | rhodanese/cell cycle control phosphatase superfamily protein | chr4:138265	Solyc06g053140.2.1	SL2.40ch06	32363112	32365707	TGS2907	32.871	32405696	TGS0266	22.597	32261601	\N	\N	\N	\N	\N	\N	#N/A	#N/A	Solyc06g053140.2	0	0	0		0.00119487	0.216172	-4.62595	ARF2sm-42R down vs wt-42G	0	0	0
Solyc06g053780.2		ARF2sm-42R vs wt-42G diff			ARF2sm-42R down vs wt-42G		ARF2sm-42R down vs wt-42G	Os02g0200800 protein (Fragment) (AHRD V1 *-*- Q0E303_ORYSJ)%3B contains Interpro domain	at3g23090.1	| symbols: | tpx2 (targeting protein for xklp2) protein family | chr3:8214533-8216983 r	Solyc06g053780.2.1	SL2.40ch06	33126272	33128573	TGS3054	37.474	33326985	TEI0367	37.065	33087457	\N	\N	\N	\N	\N	\N	#N/A	#N/A	Solyc06g053780.2	0	0	0		0.00771589	0.261774	-3.82008	ARF2sm-42R down vs wt-42G	0	0	0
Solyc06g054260.1		ARF2sm-42R vs wt-42G diff			ARF2sm-42R down vs wt-42G		ARF2sm-42R down vs wt-42G	Photosystem I reaction center subunit II (AHRD V1 ***- B4FAW3_MAIZE)%3B contains Interp	at1g03130.1	| symbols: psad-2 | photosystem i subunit d-2 | chr1:753528-754142 reverse length=204	Solyc06g054260.1.1	SL2.40ch06	33565231	33565857	CT83	38.982	33748826	TES0449	37.884	33366687	\N	\N	photosystem I reaction center	GO:0009538	\N	\N	#N/A	#N/A	Solyc06g054260.1	0	0	0		0.00297003	0.289829	-3.45031	ARF2sm-42R down vs wt-42G	0	0	0
Solyc06g060310.2		ARF2sm-42R vs wt-42G diff			ARF2sm-42R down vs wt-42G		ARF2sm-42R down vs wt-42G	Chlorophyllide a oxygenase (AHRD V1 **** B6TZB6_MAIZE)%3B contains Interpro domain(s)	at1g44446.1	| symbols: ch1 atcao cao | pheophorbide a oxygenase family protein with rieske [2fe-2	Solyc06g060310.2.1	SL2.40ch06	34673695	34677472	TES0752	44.452	35052463	TES0550	50.089	34523293	\N	\N	\N	\N	chlorophyllide a oxygenase [overall] activity	GO:0010277	chlorophyll cycle	chlorophyllide a oxygenase	Solyc06g060310.2	0	0	0		0.00569352	0.339167	-2.9484	ARF2sm-42R down vs wt-42G	0	0	0
Solyc06g060880.2		ARF2sm-42R vs wt-42G diff			ARF2sm-42R down vs wt-42G		ARF2sm-42R down vs wt-42G	Monooxygenase FAD-binding protein (AHRD V1 **-- Q1B616_MYCSS)%3B contains Interpro doma	at2g35660.1	| symbols: ctf2a | fad/nad(p)-binding oxidoreductase family protein | chr2:14988499-149	Solyc06g060880.2.1	SL2.40ch06	35282556	35285882	TG177	48.992	35523525	TGS3469	50.554	35229015	metabolic process	GO:0008152	\N	\N	oxidoreductase activity	GO:0016491	xanthophyll cycle	Zeaxanthin epoxidase, chloroplastic	Solyc06g060880.2	0	0	0		0.00401784	0.490137	-2.04025	ARF2sm-42R down vs wt-42G	0	0	0
Solyc06g062500.2		ARF2sm-42R vs wt-42G diff			ARF2sm-42R down vs wt-42G		ARF2sm-42R down vs wt-42G	60S ribosomal protein L28 (AHRD V1 ***- B3TLS3_ELAGV)%3B contains Interpro domain(s) I	at4g29410.2	| symbols: | ribosomal l28e protein family | chr4:14468439-14469964 reverse length=143	Solyc06g062500.2.1	SL2.40ch06	35820379	35822477	TGS1094	48.732	35912306	TES0094	55.155	35576006	\N	\N	ribosome	GO:0005840	\N	\N	#N/A	#N/A	Solyc06g062500.2	0	0	0		0.00355413	0.460547	-2.17133	ARF2sm-42R down vs wt-42G	0	0	0
Solyc06g063370.2		ARF2sm-42R vs wt-42G diff			ARF2sm-42R down vs wt-42G		ARF2sm-42R down vs wt-42G	Chlorophyll a-b binding protein 1A%2C chloroplastic (AHRD V1 ***- CB2A_PYRPY)%3B contai	at4g10340.1	| symbols: lhcb5 | light harvesting complex of photosystem ii 5 | chr4:6408200-6409496	Solyc06g063370.2.1	SL2.40ch06	36437291	36439451	TES0335	47.737	36474733	TES1469	48.286	36427704	\N	\N	membrane	GO:0016020	\N	\N	#N/A	#N/A	Solyc06g063370.2	0	0	0		0.0014151	0.433783	-2.3053	ARF2sm-42R down vs wt-42G	0	0	0
Solyc06g064440.2		ARF2sm-42R vs wt-42G diff			ARF2sm-42R down vs wt-42G		ARF2sm-42R down vs wt-42G	Ring finger protein 12 (AHRD V1 *-*- Q4V889_RAT)%3B contains Interpro domain(s) IPR018	at4g10150.1	| symbols: | ring/u-box superfamily protein | chr4:6328136-6329558 forward length=236	Solyc06g064440.2.1	SL2.40ch06	36514027	36517636	TGS2253	48.053	36637614	TES0335	47.737	36474733	\N	\N	\N	\N	zinc ion binding	GO:0008270	#N/A	#N/A	Solyc06g064440.2	0	0	0		0.00804407	0.38248	-2.61452	ARF2sm-42R down vs wt-42G	0	0	0
Solyc06g065260.2		ARF2sm-42R vs wt-42G diff			ARF2sm-42R down vs wt-42G		ARF2sm-42R down vs wt-42G	Receptor like kinase%2C RLK	at1g72180.1	| symbols: | leucine-rich receptor-like protein kinase family protein | chr1:27164074-2	Solyc06g065260.2.1	SL2.40ch06	37091747	37095119	TES0355	48.258	37267943	cLET5C8	49.196	37068196	\N	\N	\N	\N	transmembrane receptor protein serine/threonine kinase activity	GO:0004675	NA	Receptor-like protein kinase HAIKU2	Solyc06g065260.2	0	0	0		0.00331887	0.341662	-2.92687	ARF2sm-42R down vs wt-42G	0	0	0
Solyc06g065990.1		ARF2sm-42R vs wt-42G diff			ARF2sm-42R down vs wt-42G		ARF2sm-42R down vs wt-42G	ATP synthase subunit b%26apos (AHRD V1 ***- D8G4T7_9CYAN)%3B contains Interpro domain(s	at4g32260.1	| symbols: | atpase f0 complex subunit b/b bacterial/chloroplast | chr4:15573859-15	Solyc06g065990.1.1	SL2.40ch06	37749767	37750438	TES0292	45.716	37756511	TES0355	48.258	37267943	\N	\N	proton-transporting ATP synthase complex, coupling factor F(o)	GO:0045263	\N	\N	NA	ATP synthase subunit b', chloroplastic	Solyc06g065990.1	0	0	0		0.000940041	0.445179	-2.24629	ARF2sm-42R down vs wt-42G	0	0	0
Solyc06g068230.2		ARF2sm-42R vs wt-42G diff			ARF2sm-42R down vs wt-42G		ARF2sm-42R down vs wt-42G	Protein TIF31 homolog (AHRD V1 *--- TIF31_NEUCR)%3B contains Interpro domain(s) IPR011	at1g15290.1	| symbols: | tetratricopeptide repeat (tpr)-like superfamily protein | chr1:5257327-526	Solyc06g068230.2.1	SL2.40ch06	38675059	38684575	TG365	54.026	38968366	TES0606	47.954	38407514	\N	\N	\N	\N	binding	GO:0005488	#N/A	#N/A	Solyc06g068230.2	0	0	0		0.00353517	0.312164	-3.20344	ARF2sm-42R down vs wt-42G	0	0	0
Solyc06g068520.2		ARF2sm-42R vs wt-42G diff			ARF2sm-42R down vs wt-42G		ARF2sm-42R down vs wt-42G	Hydroxyproline-rich systemin (AHRD V1 ***- HSY1_SOLLC)	at5g07740.1	| symbols: | actin binding | chr5:2459076-2466580 reverse length=1649	Solyc06g068520.2.1	SL2.40ch06	38859435	38860682	TG365	54.026	38968366	TES0606	47.954	38407514	\N	\N	\N	\N	\N	\N	#N/A	#N/A	Solyc06g068520.2	0	0	0		0.00412529	0.48292	-2.07074	ARF2sm-42R down vs wt-42G	0	0	0
Solyc06g068590.2		ARF2sm-42R vs wt-42G diff			ARF2sm-42R down vs wt-42G		ARF2sm-42R down vs wt-42G	Serine/threonine protein kinase (AHRD V1 *-*- Q16PN5_AEDAE)%3B contains Interpro domain	at1g79640.2	| symbols: | protein kinase superfamily protein | chr1:29966821-29971090 reverse length	Solyc06g068590.2.1	SL2.40ch06	38903301	38910601	TG365	54.026	38968366	TES0606	47.954	38407514	protein phosphorylation	GO:0006468	\N	\N	\N	\N	NA	Serine/threonine protein kinase	Solyc06g068590.2	0	0	0		0.00021187	0.493838	-2.02495	ARF2sm-42R down vs wt-42G	0	0	0
Solyc06g068630.2		ARF2sm-42R vs wt-42G diff			ARF2sm-42R down vs wt-42G		ARF2sm-42R down vs wt-42G	F-box domain containing protein expressed (AHRD V1 ***- Q2R1T3_ORYSJ)%3B contains Inter	at1g49360.1	| symbols: | f-box family protein | chr1:18267338-18269423 reverse length=481	Solyc06g068630.2.1	SL2.40ch06	38933872	38935635	TG365	54.026	38968366	TES0606	47.954	38407514	\N	\N	\N	\N	\N	\N	#N/A	#N/A	Solyc06g068630.2	0	0	0		0.00184356	0.30688	-3.25861	ARF2sm-42R down vs wt-42G	0	0	0
Solyc06g071230.2		ARF2sm-42R vs wt-42G diff			ARF2sm-42R down vs wt-42G		ARF2sm-42R down vs wt-42G	MYB transcription factor (AHRD V1 **** A1DR86_CATRO)%3B contains Interpro domain(s) IP	at1g19000.2	| symbols: | homeodomain-like superfamily protein | chr1:6561335-6562684 reverse length	Solyc06g071230.2.1	SL2.40ch06	40203584	40206006	TES0494	61.63	40272767	TG253	61.917	40053234	\N	\N	\N	\N	sequence-specific DNA binding transcription factor activity	GO:0003700	#N/A	#N/A	Solyc06g071230.2	0	0	0		0.00218197	0.431279	-2.31869	ARF2sm-42R down vs wt-42G	0	0	0
Solyc06g071820.2		ARF2sm-42R vs wt-42G diff			ARF2sm-42R down vs wt-42G		ARF2sm-42R down vs wt-42G	Speckle-type poz protein (AHRD V1 *--- Q179U2_AEDAE)%3B contains Interpro domain(s) IP	at5g63160.1	| symbols: bt1 | btb and taz domain protein 1 | chr5:25333485-25335399 reverse length=3	Solyc06g071820.2.1	SL2.40ch06	40629302	40632825	TGS0812	63.222	40753604	TGS2940	63.437	40550492	\N	\N	\N	\N	protein binding	GO:0005515	#N/A	#N/A	Solyc06g071820.2	0	0	0		0.00522643	0.348286	-2.87121	ARF2sm-42R down vs wt-42G	0	0	0
Solyc06g073260.2		ARF2sm-42R vs wt-42G diff			ARF2sm-42R down vs wt-42G		ARF2sm-42R down vs wt-42G	NAD-dependent epimerase/dehydratase (AHRD V1 **-- C7QWY4_CYAP0)%3B contains Interpro do	at1g09340.1	| symbols: crb csp41b hip1.3 | chloroplast rna binding | chr1:3015473-3018035 forward	Solyc06g073260.2.1	SL2.40ch06	41530107	41533923	TES0014	73.334	41546629	U144275	77.176	41484577	\N	\N	\N	\N	mRNA binding poly(U) RNA binding	GO:0003729 GO:0008266	#N/A	#N/A	Solyc06g073260.2	0	0	0		0.00237954	0.308439	-3.24213	ARF2sm-42R down vs wt-42G	0	0	0
Solyc06g073680.2		ARF2sm-42R vs wt-42G diff			ARF2sm-42R down vs wt-42G		ARF2sm-42R down vs wt-42G	Notchless protein homolog 1 (AHRD V1 *--- NLE1_PONAB)%3B contains Interpro domain(s) I	at3g49400.1	| symbols: | transducin/wd40 repeat-like superfamily protein | chr3:18319249-18324373 r	Solyc06g073680.2.1	SL2.40ch06	41848227	41854416	T1049	76.092	41869547	TGS1056	75.843	41841958	\N	\N	\N	\N	nucleotide binding	GO:0000166	#N/A	#N/A	Solyc06g073680.2	0	0	0		0.00450709	0.473316	-2.11275	ARF2sm-42R down vs wt-42G	0	0	0
Solyc06g074190.2		ARF2sm-42R vs wt-42G diff			ARF2sm-42R down vs wt-42G		ARF2sm-42R down vs wt-42G	Os04g0625000 protein (Fragment) (AHRD V1 *-*- Q0J9Y7_ORYSJ)	at3g11590.1	| symbols: | unknown protein located in: plasma membrane expressed in: 22 plant struc	Solyc06g074190.2.1	SL2.40ch06	42262927	42265722	cLET-19-J2	75.56	42267306	TES0660	74.867	42232624	\N	\N	\N	\N	\N	\N	#N/A	#N/A	Solyc06g074190.2	0	0	0		7.6336e-05	0.350755	-2.85099	ARF2sm-42R down vs wt-42G	0	0	0
Solyc06g074900.1		ARF2sm-42R vs wt-42G diff			ARF2sm-42R down vs wt-42G		ARF2sm-42R down vs wt-42G	Trigger factor (AHRD V1 *-*- B7KBH9_CYAP7)%3B contains Interpro domain(s) IPR008881 T	at2g30695.2	| symbols: | functions in: molecular_function unknown involved in: protein folding pr	Solyc06g074900.1.1	SL2.40ch06	42790702	42791352	T1399	79.303	42931594	TGS0864	82.62	42638290	protein transport	GO:0015031	\N	\N	\N	\N	#N/A	#N/A	Solyc06g074900.1	0	0	0		0.00976169	0.475897	-2.10129	ARF2sm-42R down vs wt-42G	0	0	0
Solyc06g075980.2		ARF2sm-42R vs wt-42G diff			ARF2sm-42R down vs wt-42G		ARF2sm-42R down vs wt-42G	CRAL/TRIO domain containing protein (AHRD V1 **-- B6U4K1_MAIZE)%3B contains Interpro do	at3g46450.1	| symbols: | sec14 cytosolic factor family protein / phosphoglyceride transfer family p	Solyc06g075980.2.1	SL2.40ch06	43563647	43569037	TES0945	87.822	43590962	TES0495	86.565	43409943	\N	\N	\N	\N	transporter activity	GO:0005215	#N/A	#N/A	Solyc06g075980.2	0	0	0		0.00196941	0.474725	-2.10648	ARF2sm-42R down vs wt-42G	0	0	0
Solyc06g076850.2		ARF2sm-42R vs wt-42G diff			ARF2sm-42R down vs wt-42G		ARF2sm-42R down vs wt-42G	Binding protein (AHRD V1 ***- D7LLC0_ARALY)%3B contains Interpro domain(s) IPR011990	at2g29670.1	| symbols: | tetratricopeptide repeat (tpr)-like superfamily protein | chr2:12682309-12	Solyc06g076850.2.1	SL2.40ch06	44132035	44135117	cLES-1-K3	96.506	44239435	TES1386	94.558	44048801	\N	\N	\N	\N	binding	GO:0005488	#N/A	#N/A	Solyc06g076850.2	0	0	0		0.000710888	0.309166	-3.23451	ARF2sm-42R down vs wt-42G	0	0	0
Solyc06g082970.2		ARF2sm-42R vs wt-42G diff			ARF2sm-42R down vs wt-42G		ARF2sm-42R down vs wt-42G	DnaJ domain family (AHRD V1 ***- Q84VQ4_ARATH)%3B contains Interpro domain(s) IPR00162	at5g21430.1	| symbols: | chaperone dnaj-domain superfamily protein | chr5:7222294-7223400 forward l	Solyc06g082970.2.1	SL2.40ch06	44856886	44858406	TEI0447	104.213	45006870	TGS0588	102.588	44719293	\N	\N	\N	\N	heat shock protein binding	GO:0031072	#N/A	#N/A	Solyc06g082970.2	0	0	0		0.00368215	0.415307	-2.40786	ARF2sm-42R down vs wt-42G	0	0	0
Solyc06g083660.2		ARF2sm-42R vs wt-42G diff			ARF2sm-42R down vs wt-42G		ARF2sm-42R down vs wt-42G	Genomic DNA chromosome 5 BAC clone F6B6 (AHRD V1 ***- Q9LKC1_ARATH)	at4g28760.2	| symbols: | protein of unknown function (duf3741) | chr4:14208640-14211811 forward len	Solyc06g083660.2.1	SL2.40ch06	45288739	45294285	C2_At4g28530	107.871	45439025	TES1563	103.463	45039677	\N	\N	\N	\N	protein binding	GO:0005515	#N/A	#N/A	Solyc06g083660.2	0	0	0		0.000723552	0.159843	-6.25614	ARF2sm-42R down vs wt-42G	0	0	0
Solyc07g005300.1		ARF2sm-42R vs wt-42G diff			ARF2sm-42R down vs wt-42G		ARF2sm-42R down vs wt-42G	Unknown Protein (AHRD V1)	none	none	Solyc07g005300.1.1	SL2.40ch07	235320	235478	TG418	3.718	243742	TES0520	2.711	42003	\N	\N	\N	\N	\N	\N	#N/A	#N/A	Solyc07g005300.1	0	0	0		0.0084887	0.470368	-2.12599	ARF2sm-42R down vs wt-42G	0	0	0
Solyc07g005330.2		ARF2sm-42R vs wt-42G diff			ARF2sm-42R down vs wt-42G		ARF2sm-42R down vs wt-42G	Glucan endo-1 3-beta-glucosidase (AHRD V1 ***- B6U1F1_MAIZE)%3B contains Interpro domai	at3g55430.1	| symbols: | o-glycosyl hydrolases family 17 protein | chr3:20549806-20552004 reverse l	Solyc07g005330.2.1	SL2.40ch07	261349	264657	TES0852	2.401	325541	TG418	3.718	243742	carbohydrate metabolic process	GO:0005975	\N	\N	\N	\N	NA	beta-glucosidase 08	Solyc07g005330.2	0	0	0		0.00827641	0.42989	-2.32618	ARF2sm-42R down vs wt-42G	0	0	0
Solyc07g005440.1		ARF2sm-42R vs wt-42G diff			ARF2sm-42R down vs wt-42G		ARF2sm-42R down vs wt-42G	CBL-interacting protein kinase 9 (AHRD V1 **** A0MNJ6_POPTR)%3B contains Interpro domai	at4g30960.1	| symbols: cipk6 sip3 snrk3.14 atcipk6 | sos3-interacting protein 3 | chr4:15067400-	Solyc07g005440.1.1	SL2.40ch07	339058	340332	TGS0943	3.391	413919	TES0852	2.401	325541	\N	\N	\N	\N	AMP-activated protein kinase activity	GO:0004679	NA	SOS3-interacting protein 3	Solyc07g005440.1	0	0	0		0.00265028	0.337992	-2.95865	ARF2sm-42R down vs wt-42G	0	0	0
Solyc07g006050.1		ARF2sm-42R vs wt-42G diff			ARF2sm-42R down vs wt-42G		ARF2sm-42R down vs wt-42G	Histone-lysine N-methyltransferase ASHR3 (AHRD V1 *-*- ASHR3_ARATH)%3B contains Interpr	at4g30860.1	| symbols: ashr3 sdg4 | set domain group 4 | chr4:15024546-15027427 forward length=497	Solyc07g006050.1.1	SL2.40ch07	895880	900000	TES0683	4.681	997450	TES1008	3.017	586997	\N	\N	\N	\N	zinc ion binding	GO:0008270	NA	SET domain protein	Solyc07g006050.1	0	0	0		0.00156634	0.452571	-2.2096	ARF2sm-42R down vs wt-42G	0	0	0
Solyc07g006810.2		ARF2sm-42R vs wt-42G diff			ARF2sm-42R down vs wt-42G		ARF2sm-42R down vs wt-42G	Adenosylmethionine-8-amino-7-oxononanoate aminotransferase-like protein (AHRD V1 **** Q	at5g57590.1	| symbols: bio1 | adenosylmethionine-8-amino-7-oxononanoate transaminases | chr5:233185	Solyc07g006810.2.1	SL2.40ch07	1648413	1658924	CT52	3.735	1701510	TES0178	1.5	1448622	\N	\N	\N	\N	adenosylmethionine-8-amino-7-oxononanoate transaminase activity	GO:0004015	biotin biosynthesis II	adenosylmethionine-8-amino-7-oxononanoate transaminase	Solyc07g006810.2	0	0	0		0.000816053	0.490418	-2.03908	ARF2sm-42R down vs wt-42G	0	0	0
Solyc07g017220.2		ARF2sm-42R vs wt-42G diff			ARF2sm-42R down vs wt-42G		ARF2sm-42R down vs wt-42G	Os10g0422600 protein (Fragment) (AHRD V1 *-*- Q0IXM0_ORYSJ)%3B contains Interpro domain	at5g20700.1	| symbols: | protein of unknown function (duf581) | chr5:7006178-7007003 reverse length	Solyc07g017220.2.1	SL2.40ch07	6515317	6518394	T1428	24.017	6881535	TGS2163	27.883	5640637	\N	\N	\N	\N	\N	\N	#N/A	#N/A	Solyc07g017220.2	0	0	0		0.00576377	0.486842	-2.05405	ARF2sm-42R down vs wt-42G	0	0	0
Solyc07g018070.2		ARF2sm-42R vs wt-42G diff			ARF2sm-42R down vs wt-42G		ARF2sm-42R down vs wt-42G	Heat shock protein-related (Fragment) (AHRD V1 *--- B7ZEI4_ARATH)%3B contains Interpro	at4g29920.1	| symbols: | double clp-n motif-containing p-loop nucleoside triphosphate hydrolases su	Solyc07g018070.2.1	SL2.40ch07	8990175	8994973	TGS1430	26.107	9294064	TGS2355	25.362	8863515	protein metabolic process	GO:0019538	\N	\N	\N	\N	#N/A	#N/A	Solyc07g018070.2	0	0	0		0.00661532	0.42868	-2.33274	ARF2sm-42R down vs wt-42G	0	0	0
Solyc07g022900.2		ARF2sm-42R vs wt-42G diff			ARF2sm-42R down vs wt-42G		ARF2sm-42R down vs wt-42G	Chlorophyll a-b binding protein 4%2C chloroplastic (AHRD V1 **** CA4_ARATH)%3B contains	at1g45474.2	| symbols: lhca5 | photosystem i light harvesting complex gene 5 | chr1:17179353-171804	Solyc07g022900.2.1	SL2.40ch07	23224809	23226448	TGS2352	22.008	25060780	TGS2307	29.892	23054102	\N	\N	\N	\N	pigment binding	GO:0031409	#N/A	#N/A	Solyc07g022900.2	0	0	0		0.00103174	0.0637013	-15.6983	ARF2sm-42R down vs wt-42G	0	0	0
Solyc07g032620.1		ARF2sm-42R vs wt-42G diff			ARF2sm-42R down vs wt-42G		ARF2sm-42R down vs wt-42G	Oxygen-evolving enhancer protein 1%2C chloroplastic (AHRD V1 ***- PSBO_SOLTU)%3B contai	at3g50820.1	| symbols: psbo2 psbo-2 oec33 | photosystem ii subunit o-2 | chr3:18891008-18892311 r	Solyc07g032620.1.1	SL2.40ch07	40304507	40305986	TGS0844	29.102	42511526	TGS2276	27.061	39980910	\N	\N	extrinsic to membrane	GO:0019898	\N	\N	#N/A	#N/A	Solyc07g032620.1	0	0	0		0.00429582	0.276488	-3.6168	ARF2sm-42R down vs wt-42G	0	0	0
Solyc07g039380.2		ARF2sm-42R vs wt-42G diff			ARF2sm-42R down vs wt-42G		ARF2sm-42R down vs wt-42G	Unknown Protein (AHRD V1)	at2g26110.1	| symbols: | protein of unknown function (duf761) | chr2:11120869-11121798 forward leng	Solyc07g039380.2.1	SL2.40ch07	44659424	44660201	TGS0397	28.458	46461531	tma0203	27.263	43810141	\N	\N	\N	\N	\N	\N	#N/A	#N/A	Solyc07g039380.2	0	0	0		0.00893447	0.293933	-3.40213	ARF2sm-42R down vs wt-42G	0	0	0
Solyc07g041340.1		ARF2sm-42R vs wt-42G diff			ARF2sm-42R down vs wt-42G		ARF2sm-42R down vs wt-42G	ELF4-like protein (AHRD V1 ***- C6ZKI7_SOLTU)%3B contains Interpro domain(s) IPR009741	at2g06255.1	| symbols: elf4-l3 | elf4-like 3 | chr2:2459336-2459665 forward length=109	Solyc07g041340.1.1	SL2.40ch07	49758322	49758651	TGS1396	27.196	50759155	TGS2841	27.061	49295356	\N	\N	\N	\N	\N	\N	#N/A	#N/A	Solyc07g041340.1	0	0	0		0.00974105	0.29486	-3.39144	ARF2sm-42R down vs wt-42G	0	0	0
Solyc07g041400.2		ARF2sm-42R vs wt-42G diff			ARF2sm-42R down vs wt-42G		ARF2sm-42R down vs wt-42G	Unknown Protein (AHRD V1)%3B contains Interpro domain(s) IPR012340 Nucleic acid-bindi	at5g08020.1	| symbols: atrpa70b rpa70b | rpa70-kda subunit b | chr5:2572107-2574879 forward length	Solyc07g041400.2.1	SL2.40ch07	50178367	50179092	TGS1396	27.196	50759155	TGS2841	27.061	49295356	\N	\N	\N	\N	\N	\N	#N/A	#N/A	Solyc07g041400.2	0	0	0		0.00517198	0.468585	-2.13408	ARF2sm-42R down vs wt-42G	0	0	0
Solyc07g042000.2		ARF2sm-42R vs wt-42G diff			ARF2sm-42R down vs wt-42G		ARF2sm-42R down vs wt-42G	Sodium/calcium exchanger protein (AHRD V1 *-** B6K816_SCHJY)%3B contains Interpro domai	at3g14070.1	| symbols: cax9 ccx3 atccx3 | cation exchanger 9 | chr3:4661143-4663074 reverse lengt	Solyc07g042000.2.1	SL2.40ch07	52128503	52130786	TES1075	26.31	52508740	tma0139	26.393	51995506	\N	\N	\N	\N	calcium:sodium antiporter activity	GO:0005432	#N/A	#N/A	Solyc07g042000.2	0	0	0		0.00351204	0.49231	-2.03124	ARF2sm-42R down vs wt-42G	0	0	0
Solyc07g043160.1		ARF2sm-42R vs wt-42G diff			ARF2sm-42R down vs wt-42G		ARF2sm-42R down vs wt-42G	UDP-glucosyltransferase (AHRD V1 **** A7M6U9_IPONI)%3B contains Interpro domain(s) IPR	at3g21790.1	| symbols: | udp-glycosyltransferase superfamily protein | chr3:7676927-7678414 reverse	Solyc07g043160.1.1	SL2.40ch07	54117285	54118607	TES0573	35.275	54207929	TGS1181	34.788	54092759	\N	\N	\N	\N	quercetin 3-O-glucosyltransferase activity	GO:0080043	anthocyanin biosynthesis (delphinidin 3-O-glucoside)	glucosyltransferase	Solyc07g043160.1	0	0	0		0.000451935	0.440862	-2.26828	ARF2sm-42R down vs wt-42G	0	0	0
Solyc07g043230.2		ARF2sm-42R vs wt-42G diff			ARF2sm-42R down vs wt-42G		ARF2sm-42R down vs wt-42G	Low affinity zinc transporter (AHRD V1 **** A3LU47_PICST)%3B contains Interpro domain(s	at1g05300.1	| symbols: zip5 | zinc transporter 5 precursor | chr1:1545258-1547709 reverse length=36	Solyc07g043230.2.1	SL2.40ch07	54150990	54153978	TES0573	35.275	54207929	TGS1181	34.788	54092759	\N	\N	\N	\N	high affinity zinc uptake transmembrane transporter activity low-affinity zinc ion tran	GO:0000006 GO:0000007	#N/A	#N/A	Solyc07g043230.2	0	0	0		0.00591261	0.174264	-5.73843	ARF2sm-42R down vs wt-42G	0	0	0
Solyc07g045540.2		ARF2sm-42R vs wt-42G diff			ARF2sm-42R down vs wt-42G		ARF2sm-42R down vs wt-42G	Glucose-6-phosphate 1-dehydrogenase (AHRD V1 **** O65856_TOBAC)%3B contains Interpro do	at5g35790.1	| symbols: g6pd1 | glucose-6-phosphate dehydrogenase 1 | chr5:13956879-13959686 reverse	Solyc07g045540.2.1	SL2.40ch07	55999419	56004983	TES0903	40.902	56358285	TGS3323	40.335	55952230	\N	\N	\N	\N	glucose-6-phosphate dehydrogenase activity	GO:0004345	pentose phosphate pathway (oxidative branch)	glucose-6-phosphate 1-dehydrogenase	Solyc07g045540.2	0	0	0		0.000812994	0.369034	-2.70978	ARF2sm-42R down vs wt-42G	0	0	0
Solyc07g047850.2		ARF2sm-42R vs wt-42G diff			ARF2sm-42R down vs wt-42G		ARF2sm-42R down vs wt-42G	Chlorophyll a-b binding protein 4%2C chloroplastic (AHRD V1 **** CB24_SOLLC)%3B contain	at2g05100.1	| symbols: lhcb2.1 lhcb2 | photosystem ii light harvesting complex gene 2.1 | chr2:182	Solyc07g047850.2.1	SL2.40ch07	56404445	56405833	tma0137	41.628	56740212	TES1755	42.596	56398634	\N	\N	\N	\N	chlorophyll binding	GO:0016168	#N/A	#N/A	Solyc07g047850.2	0	0	0		0.000877217	0.139743	-7.15599	ARF2sm-42R down vs wt-42G	0	0	0
Solyc07g049180.2		ARF2sm-42R vs wt-42G diff			ARF2sm-42R down vs wt-42G		ARF2sm-42R down vs wt-42G	Receptor-like protein kinase At5g59670 (AHRD V1 *-** RLK7_ARATH)%3B contains Interpro d	at3g21630.1	| symbols: cerk1 lysm rlk1 | chitin elicitor receptor kinase 1 | chr3:7615543-7618530	Solyc07g049180.2.1	SL2.40ch07	56760988	56770880	TES1567	41.297	56819053	tma0137	41.628	56740212	\N	\N	\N	\N	transmembrane receptor protein kinase activity receptor signaling protein activity	GO:0019199 GO:0005057	NA	chitin elicitor receptor kinase 1	Solyc07g049180.2	0	0	0		0.00711787	0.4567	-2.18962	ARF2sm-42R down vs wt-42G	0	0	0
Solyc07g049280.2		ARF2sm-42R vs wt-42G diff			ARF2sm-42R down vs wt-42G		ARF2sm-42R down vs wt-42G	Diphosphate-fructose-6-phosphate 1-phosphotransferase (AHRD V1 ***- D0TAW1_9BACE)%3B co	at1g12000.1	| symbols: | phosphofructokinase family protein | chr1:4050159-4053727 reverse length=5	Solyc07g049280.2.1	SL2.40ch07	56858846	56866428	T1510	41.955	56967470	TES1567	41.297	56819053	\N	\N	6-phosphofructokinase complex	GO:0005945	\N	\N	glycolysis IV (plant cytosol)	pyrophosphate-dependent phosphofructokinase	Solyc07g049280.2	0	0	0		0.00115328	0.468416	-2.13486	ARF2sm-42R down vs wt-42G	0	0	0
Solyc07g052610.2		ARF2sm-42R vs wt-42G diff			ARF2sm-42R down vs wt-42G		ARF2sm-42R down vs wt-42G	Cyclin (AHRD V1 *-*- D8UD80_VOLCA)%3B contains Interpro domain(s) IPR012389 Negative	at3g21870.1	| symbols: cycp2 1 | cyclin p2 1 | chr3:7703927-7704813 reverse length=210	Solyc07g052610.2.1	SL2.40ch07	58400621	58402141	TES0980	45.598	58521618	TEI0085	43.823	58344465	\N	\N	\N	\N	protein binding	GO:0005515	#N/A	#N/A	Solyc07g052610.2	0	0	0		0.00378209	0.258613	-3.86678	ARF2sm-42R down vs wt-42G	0	0	0
Solyc07g052680.1		ARF2sm-42R vs wt-42G diff			ARF2sm-42R down vs wt-42G		ARF2sm-42R down vs wt-42G	Unknown Protein (AHRD V1)	at3g22070.1	| symbols: | proline-rich family protein | chr3:7775530-7776066 reverse length=178	Solyc07g052680.1.1	SL2.40ch07	58459308	58459763	TES0980	45.598	58521618	TEI0085	43.823	58344465	\N	\N	\N	\N	\N	\N	#N/A	#N/A	Solyc07g052680.1	0	0	0		0.00523056	0.301399	-3.31786	ARF2sm-42R down vs wt-42G	0	0	0
Solyc07g053630.2		ARF2sm-42R vs wt-42G diff			ARF2sm-42R down vs wt-42G		ARF2sm-42R down vs wt-42G	Response regulator (AHRD V1 *--- A1A6A6_ORYSJ)%3B contains Interpro domain(s) IPR00644	at2g20570.1	| symbols: gpri1 glk1 atglk1 | gbf s pro-rich region-interacting factor 1 | chr2:8855	Solyc07g053630.2.1	SL2.40ch07	59386217	59390311	TEI0563	43.804	59572474	TES1675	45.318	59220772	\N	\N	\N	\N	sequence-specific DNA binding transcription factor activity	GO:0003700	#N/A	#N/A	Solyc07g053630.2	0	0	0		0.00297379	0.350747	-2.85106	ARF2sm-42R down vs wt-42G	0	0	0
Solyc07g055670.1		ARF2sm-42R vs wt-42G diff			ARF2sm-42R down vs wt-42G		ARF2sm-42R down vs wt-42G	Receptor-like kinase (AHRD V1 **** B6EB06_NICGU)%3B contains Interpro domain(s) IPR002	at4g32300.1	| symbols: sd2-5 | s-domain-2 5 | chr4:15599970-15602435 forward length=821 | symbols:	Solyc07g055670.1.1	SL2.40ch07	60947079	60947792	TGS0412	53.716	61372245	TES1057	47.747	60727202	\N	\N	\N	\N	protein binding kinase activity	GO:0005515 GO:0016301	NA	S-domain-2 5	Solyc07g055670.1	0	0	0		0.00349403	0.300827	-3.32417	ARF2sm-42R down vs wt-42G	0	0	0
Solyc07g056240.2		ARF2sm-42R vs wt-42G diff			ARF2sm-42R down vs wt-42G		ARF2sm-42R down vs wt-42G	Unknown Protein (AHRD V1)	at2g42975.1	| symbols: | unknown protein functions in: molecular_function unknown involved in: bi	Solyc07g056240.2.1	SL2.40ch07	61404309	61406623	TEI0655	55.211	61451735	TG572	49.558	61391977	\N	\N	\N	\N	\N	\N	#N/A	#N/A	Solyc07g056240.2	0	0	0		0.00232046	0.372763	-2.68267	ARF2sm-42R down vs wt-42G	0	0	0
Solyc07g056540.2		ARF2sm-42R vs wt-42G diff			ARF2sm-42R down vs wt-42G		ARF2sm-42R down vs wt-42G	L-lactate dehydrogenase (AHRD V1 ***- C0S8Q7_PARBP)%3B contains Interpro domain(s) IPR	at3g14420.2	| symbols: | aldolase-type tim barrel family protein | chr3:4821804-4823899 forward len	Solyc07g056540.2.1	SL2.40ch07	61655287	61658877	TES0263	57.375	62014746	TEI0655	55.211	61451735	\N	\N	\N	\N	glycolate oxidase activity	GO:0008891	NA	glycolate oxidase	Solyc07g056540.2	0	0	0		0.00460234	0.115789	-8.63641	ARF2sm-42R down vs wt-42G	0	0	0
Solyc07g062470.2		ARF2sm-42R vs wt-42G diff			ARF2sm-42R down vs wt-42G		ARF2sm-42R down vs wt-42G	Light-dependent short hypocotyls 1 (AHRD V1 ***- D7M6V0_ARALY)%3B contains Interpro dom	at2g42610.2	| symbols: lsh10 | protein of unknown function (duf640) | chr2:17748005-17748538 forwar	Solyc07g062470.2.1	SL2.40ch07	62414891	62417919	TES1464	63.718	62483741	TEI0193	56.527	62114599	\N	\N	\N	\N	\N	\N	#N/A	#N/A	Solyc07g062470.2	0	0	0		0.00433304	0.141749	-7.05473	ARF2sm-42R down vs wt-42G	0	0	0
Solyc07g062500.2		ARF2sm-42R vs wt-42G diff			ARF2sm-42R down vs wt-42G		ARF2sm-42R down vs wt-42G	Cytochrome P450	at3g14690.1	| symbols: cyp72a15 | cytochrome p450 family 72 subfamily a polypeptide 15 | chr3:49	Solyc07g062500.2.1	SL2.40ch07	62434832	62439287	TES1464	63.718	62483741	TEI0193	56.527	62114599	\N	\N	\N	\N	oxygen binding	GO:0019825	NA	Cytochrome P450	Solyc07g062500.2	0	0	0		0.00194845	0.347948	-2.874	ARF2sm-42R down vs wt-42G	0	0	0
Solyc07g063600.2		ARF2sm-42R vs wt-42G diff			ARF2sm-42R down vs wt-42G		ARF2sm-42R down vs wt-42G	Chlorophyll a-b binding protein 13%2C chloroplastic (AHRD V1 ***- CB23_SOLLC)%3B contai	at5g54270.1	| symbols: lhcb3 lhcb3*1 | light-harvesting chlorophyll b-binding protein 3 | chr5:220	Solyc07g063600.2.1	SL2.40ch07	63262431	63264147	TGS0821	71.481	63585337	T1366	72.072	63223311	\N	\N	\N	\N	structural molecule activity	GO:0005198	#N/A	#N/A	Solyc07g063600.2	0	0	0		0.00573891	0.314259	-3.18209	ARF2sm-42R down vs wt-42G	0	0	0
Solyc07g064580.2		ARF2sm-42R vs wt-42G diff			ARF2sm-42R down vs wt-42G		ARF2sm-42R down vs wt-42G	Os04g0625000 protein (Fragment) (AHRD V1 *-*- Q0J9Y7_ORYSJ)	at1g50660.1	| symbols: | unknown protein involved in: biological_process unknown located in: chlo	Solyc07g064580.2.1	SL2.40ch07	63884910	63888157	T966	77.479	63896656	TEI0510	73.962	63630209	\N	\N	\N	\N	\N	\N	#N/A	#N/A	Solyc07g064580.2	0	0	0		0.00169771	0.457891	-2.18392	ARF2sm-42R down vs wt-42G	0	0	0
Solyc07g065320.2		ARF2sm-42R vs wt-42G diff			ARF2sm-42R down vs wt-42G		ARF2sm-42R down vs wt-42G	Multidrug resistance protein ABC transporter family (AHRD V1 **-- B9GJX7_POPTR)%3B cont	at3g13080.1	| symbols: atmrp3 mrp3 abcc3 | multidrug resistance-associated protein 3 | chr3:41960	Solyc07g065320.2.1	SL2.40ch07	64353577	64359178	TGS0939	86.346	64406767	TES1865	80.451	64157378	\N	\N	\N	\N	glutathione S-conjugate-exporting ATPase activity	GO:0015431	NA	ABC transporter C family member 3	Solyc07g065320.2	0	0	0		0.00235976	0.425101	-2.35238	ARF2sm-42R down vs wt-42G	0	0	0
Solyc07g065920.2		ARF2sm-42R vs wt-42G diff			ARF2sm-42R down vs wt-42G		ARF2sm-42R down vs wt-42G	Ferredoxin-fold anticodon-binding domain-containing protein 1 (AHRD V1 *--* FDXA1_HUMAN	at1g55790.1	| symbols: | domain of unknown function (duf2431) | chr1:20852685-20856069 reverse leng	Solyc07g065920.2.1	SL2.40ch07	64725051	64727923	TES0549	93.308	64899925	T848	89.654	64567498	\N	\N	\N	\N	nucleic acid binding	GO:0003676	#N/A	#N/A	Solyc07g065920.2	0	0	0		0.00916572	0.267333	-3.74065	ARF2sm-42R down vs wt-42G	0	0	0
Solyc07g066150.1		ARF2sm-42R vs wt-42G diff			ARF2sm-42R down vs wt-42G		ARF2sm-42R down vs wt-42G	Photosystem I reaction center subunit V (AHRD V1 ***- B6U534_MAIZE)%3B contains Interpr	at1g55670.1	| symbols: psag | photosystem i subunit g | chr1:20802874-20803356 reverse length=160	Solyc07g066150.1.1	SL2.40ch07	64869442	64869882	TES0549	93.308	64899925	T848	89.654	64567498	\N	\N	membrane	GO:0016020	\N	\N	#N/A	#N/A	Solyc07g066150.1	0	0	0		0.000660579	0.139524	-7.16723	ARF2sm-42R down vs wt-42G	0	0	0
Solyc07g066230.2		ARF2sm-42R vs wt-42G diff			ARF2sm-42R down vs wt-42G		ARF2sm-42R down vs wt-42G	Receptor like kinase%2C RLK Receptor like kinase%2C RLK	at3g13380.1	| symbols: brl3 | bri1-like 3 | chr3:4347240-4350734 forward length=1164 | symbols: brl	Solyc07g066230.2.1	SL2.40ch07	64932923	64936722	TGS2303	96.124	64950130	TES0549	93.308	64899925	\N	\N	\N	\N	identical protein binding transmembrane receptor protein serine/threonine kinase activi	GO:0042802 GO:0004675	NA	Receptor like kinase%2C RLK	Solyc07g066230.2	0	0	0		0.00733592	0.441507	-2.26497	ARF2sm-42R down vs wt-42G	0	0	0
Solyc07g066350.1		ARF2sm-42R vs wt-42G diff			ARF2sm-42R down vs wt-42G		ARF2sm-42R down vs wt-42G	Unknown Protein (AHRD V1)	at1g79060.1	| symbols: | unknown protein best arabidopsis thaliana protein match is: unknown prote	Solyc07g066350.1.1	SL2.40ch07	65045913	65047115	TGS2259	97.332	65047162	TES1718	93.936	64988006	\N	\N	\N	\N	\N	\N	#N/A	#N/A	Solyc07g066350.1	0	0	0		0.00252815	0.349088	-2.86461	ARF2sm-42R down vs wt-42G	0	0	0
Solyc08g005430.2		ARF2sm-42R vs wt-42G diff			ARF2sm-42R down vs wt-42G		ARF2sm-42R down vs wt-42G	Growth-regulating factor 4 (AHRD V1 **-- Q6ZIK5_ORYSJ)%3B contains Interpro domain(s)	at3g13960.1	| symbols: atgrf5 grf5 | growth-regulating factor 5 | chr3:4608526-4610160 forward len	Solyc08g005430.2.1	SL2.40ch08	317215	320529	TES0948	2.091	409329	cLEF51A13	2.871	95559	\N	\N	nucleus	GO:0005634	\N	\N	#N/A	#N/A	Solyc08g005430.2	0	0	0		0.00423394	0.467326	-2.13983	ARF2sm-42R down vs wt-42G	0	0	0
Solyc08g006930.2		ARF2sm-42R vs wt-42G diff			ARF2sm-42R down vs wt-42G		ARF2sm-42R down vs wt-42G	Photosystem I reaction center subunit X psaK (AHRD V1 ***- Q84QE6_TOBAC)%3B contains In	at1g30380.1	| symbols: psak | photosystem i subunit k | chr1:10722325-10723013 forward length=130	Solyc08g006930.2.1	SL2.40ch08	1496863	1500142	TG176	2.904	1913353	tme0016	2.621	1112253	\N	\N	membrane	GO:0016020	\N	\N	#N/A	#N/A	Solyc08g006930.2	0	0	0		0.00178576	0.156367	-6.3952	ARF2sm-42R down vs wt-42G	0	0	0
Solyc08g007070.2		ARF2sm-42R vs wt-42G diff			ARF2sm-42R down vs wt-42G		ARF2sm-42R down vs wt-42G	Unknown Protein (AHRD V1)													\N	\N	\N	\N	\N	\N	#N/A	#N/A	Solyc08g007070.2	0	0	0		0.005966	0.366327	-2.7298	ARF2sm-42R down vs wt-42G	0	0	0
Solyc08g007640.1		ARF2sm-42R vs wt-42G diff			ARF2sm-42R down vs wt-42G		ARF2sm-42R down vs wt-42G	Lrr%2C resistance protein fragment Lrr%2C resistance protein fragment	at3g14460.1	| symbols: | lrr and nb-arc domains-containing disease resistance protein | chr3:485199	Solyc08g007640.1.1	SL2.40ch08	2164226	2165170	TES0999	1.521	2446687	TG176	2.904	1913353	\N	\N	\N	\N	protein binding	GO:0005515	#N/A	#N/A	Solyc08g007640.1	0	0	0		0.00484142	0.422066	-2.3693	ARF2sm-42R down vs wt-42G	0	0	0
Solyc08g007770.2		ARF2sm-42R vs wt-42G diff			ARF2sm-42R down vs wt-42G		ARF2sm-42R down vs wt-42G	PGR5-like protein 1A%2C chloroplastic (AHRD V1 ***- PGL1A_ARATH)	at4g22890.2	| symbols: pgr5-like a | pgr5-like a | chr4:12007157-12009175 forward length=324	Solyc08g007770.2.1	SL2.40ch08	2287091	2290348	TES0999	1.521	2446687	TG176	2.904	1913353	\N	\N	\N	\N	\N	\N	#N/A	#N/A	Solyc08g007770.2	0	0	0		0.00989314	0.480186	-2.08253	ARF2sm-42R down vs wt-42G	0	0	0
Solyc08g013670.2		ARF2sm-42R vs wt-42G diff			ARF2sm-42R down vs wt-42G		ARF2sm-42R down vs wt-42G	Photosystem I reaction center subunit (AHRD V1 ***- D2K7Z2_TOBAC)%3B contains Interpro	at5g64040.1	| symbols: psan | photosystem i reaction center subunit psi-n chloroplast putative /	Solyc08g013670.2.1	SL2.40ch08	3047003	3048193	TES0113	20.672	3292424	TES1761	9.445	2932506	\N	\N	\N	\N	calmodulin binding	GO:0005516	#N/A	#N/A	Solyc08g013670.2	0	0	0		0.00453951	0.177517	-5.63325	ARF2sm-42R down vs wt-42G	0	0	0
Solyc08g015660.2		ARF2sm-42R vs wt-42G diff			ARF2sm-42R down vs wt-42G		ARF2sm-42R down vs wt-42G	6 7-dimethyl-8-ribityllumazine synthase (AHRD V1 **** Q5ZQU1_TOBAC)%3B contains Interpr													\N	\N	\N	\N	6,7-dimethyl-8-ribityllumazine synthase activity	GO:0000906	flavin biosynthesis	6 7-dimethyl-8-ribityllumazine synthase	Solyc08g015660.2	0	0	0		0.00196036	0.439112	-2.27732	ARF2sm-42R down vs wt-42G	0	0	0
Solyc08g028690.2		ARF2sm-42R vs wt-42G diff			ARF2sm-42R down vs wt-42G		ARF2sm-42R down vs wt-42G	Tasselseed2-like short-chain dehydrogenase/reductase (Fragment) (AHRD V1 ***- Q2EFE2_9P	at3g51680.1	| symbols: | nad(p)-binding rossmann-fold superfamily protein | chr3:19173622-19174667	Solyc08g028690.2.1	SL2.40ch08	18468958	18472092	TGS2132	26.996	19515251	TEI0541	26.928	14109447	oxidation-reduction process metabolic process	GO:0055114 GO:0008152	\N	\N	\N	\N	NA	Tasselseed2-like short-chain dehydrogenase/reductase (Fragment)	Solyc08g028690.2	0	0	0		0.000875257	0.371629	-2.69086	ARF2sm-42R down vs wt-42G	0	0	0
Solyc08g029360.2		ARF2sm-42R vs wt-42G diff			ARF2sm-42R down vs wt-42G		ARF2sm-42R down vs wt-42G	Unknown Protein (AHRD V1)	none	none	Solyc08g029360.2.1	SL2.40ch08	24337403	24338749	TES0515	26.033	25432514	TGS0224	26.996	23563212	\N	\N	\N	\N	\N	\N	#N/A	#N/A	Solyc08g029360.2	0	0	0		0.000273658	0.465659	-2.14749	ARF2sm-42R down vs wt-42G	0	0	0
Solyc08g048370.2		ARF2sm-42R vs wt-42G diff			ARF2sm-42R down vs wt-42G		ARF2sm-42R down vs wt-42G	Transcription factor CYCLOIDEA (Fragment) (AHRD V1 *-*- CYCLD_ANTML)%3B contains Interp	at4g18390.2	| symbols: tcp2 | teosinte branched 1 cycloidea and pcf transcription factor 2 | chr4:	Solyc08g048370.2.1	SL2.40ch08	39566685	39571703	TGS0689	28.918	40380558	TGS2256	28.918	38261137	\N	\N	\N	\N	\N	\N	#N/A	#N/A	Solyc08g048370.2	0	0	0		0.00260677	0.454105	-2.20213	ARF2sm-42R down vs wt-42G	0	0	0
Solyc08g060970.2		ARF2sm-42R vs wt-42G diff			ARF2sm-42R down vs wt-42G		ARF2sm-42R down vs wt-42G	Polygalacturonase (AHRD V1 **-* Q9ZPI8_SOLLC)%3B contains Interpro domain(s) IPR012334	at5g27530.1	| symbols: | pectin lyase-like superfamily protein | chr5:9717503-9721097 forward lengt	Solyc08g060970.2.1	SL2.40ch08	43354428	43359171	T1358	26.413	43869067	tma0304	25.824	41699186	\N	\N	\N	\N	polygalacturonase activity	GO:0004650	homogalacturonan degradation	polygalacturonase	Solyc08g060970.2	0	0	0		0.00261331	0.308193	-3.24472	ARF2sm-42R down vs wt-42G	0	0	0
Solyc08g061930.2		ARF2sm-42R vs wt-42G diff			ARF2sm-42R down vs wt-42G		ARF2sm-42R down vs wt-42G	Cytokinin oxidase/dehydrogenase (AHRD V1 **** C3VPM8_SOLTU)%3B contains Interpro domain	at5g21482.1	| symbols: ckx7 atckx5 | cytokinin oxidase 7 | chr5:7226842-7230052 forward length=524	Solyc08g061930.2.1	SL2.40ch08	47205921	47209565	TES0990	25.382	47402342	TG45	26.234	46484719	\N	\N	\N	\N	cytokinin dehydrogenase activity	GO:0019139	cytokinins degradation	oxidoreductase//cytokinin dehydrogenase	Solyc08g061930.2	0	0	0		0.00804173	0.457194	-2.18726	ARF2sm-42R down vs wt-42G	0	0	0
Solyc08g062970.1		ARF2sm-42R vs wt-42G diff			ARF2sm-42R down vs wt-42G		ARF2sm-42R down vs wt-42G	Glutaredoxin (AHRD V1 ***- B9H2P7_POPTR)%3B contains Interpro domain(s) IPR011905 Glu	at4g33040.1	| symbols: | thioredoxin superfamily protein | chr4:15940779-15941213 reverse length=14	Solyc08g062970.1.1	SL2.40ch08	49664250	49664669	TGS0398	20.712	50255299	TEI0115	26.655	49548164	cell redox homeostasis	GO:0045454	\N	\N	\N	\N	#N/A	#N/A	Solyc08g062970.1	0	0	0		0.00463525	0.453767	-2.20377	ARF2sm-42R down vs wt-42G	0	0	0
Solyc08g066070.1		ARF2sm-42R vs wt-42G diff			ARF2sm-42R down vs wt-42G		ARF2sm-42R down vs wt-42G	Exocyst complex protein EXO70 (AHRD V1 *--- EXO70_KLULA)%3B contains Interpro domain(s)	at5g58430.1	| symbols: atexo70b1 exo70b1 | exocyst subunit exo70 family protein b1 | chr5:23621460	Solyc08g066070.1.1	SL2.40ch08	51728386	51730281	TGS3508	33.349	51773960	TGS2706	34.828	51711839	\N	\N	\N	\N	protein binding	GO:0005515	#N/A	#N/A	Solyc08g066070.1	0	0	0		0.000650436	0.460498	-2.17156	ARF2sm-42R down vs wt-42G	0	0	0
Solyc08g069010.2		ARF2sm-42R vs wt-42G diff			ARF2sm-42R down vs wt-42G		ARF2sm-42R down vs wt-42G	Pentatricopeptide repeat-containing protein (AHRD V1 ***- D7M2Z4_ARALY)%3B contains Int	at5g10690.1	| symbols: | pentatricopeptide (ppr) repeat-containing protein / cbs domain-containing	Solyc08g069010.2.1	SL2.40ch08	55300249	55313870	TES0611	50.852	56008027	C2_At4g32770	44.599	54922694	\N	\N	\N	\N	\N	\N	#N/A	#N/A	Solyc08g069010.2	0	0	0		0.000983601	0.433804	-2.30519	ARF2sm-42R down vs wt-42G	0	0	0
Solyc08g074450.2		ARF2sm-42R vs wt-42G diff			ARF2sm-42R down vs wt-42G		ARF2sm-42R down vs wt-42G	(RAP Annotation release2) Galactose-binding like domain containing protein (AHRD V1 **-	at4g31115.2	| symbols: | protein of unknown function (duf1997) | chr4:15130243-15131847 forward len	Solyc08g074450.2.1	SL2.40ch08	55725052	55731088	TES0611	50.852	56008027	C2_At4g32770	44.599	54922694	\N	\N	\N	\N	\N	\N	#N/A	#N/A	Solyc08g074450.2	0	0	0		0.00102353	0.441554	-2.26473	ARF2sm-42R down vs wt-42G	0	0	0
Solyc08g075910.1		ARF2sm-42R vs wt-42G diff			ARF2sm-42R down vs wt-42G		ARF2sm-42R down vs wt-42G	RING finger protein 13 (AHRD V1 *--- RNF13_CHICK)%3B contains Interpro domain(s) IPR01	at2g40830.3	| symbols: rhc1a | ring-h2 finger c1a | chr2:17043642-17044628 forward length=328	Solyc08g075910.1.1	SL2.40ch08	57154299	57155204	TES1088	57.756	57499383	TES0349	58.407	57093061	\N	\N	\N	\N	zinc ion binding	GO:0008270	#N/A	#N/A	Solyc08g075910.1	0	0	0		0.00015728	0.329256	-3.03715	ARF2sm-42R down vs wt-42G	0	0	0
Solyc08g076060.2		ARF2sm-42R vs wt-42G diff			ARF2sm-42R down vs wt-42G		ARF2sm-42R down vs wt-42G	Serine/threonine kinase receptor (AHRD V1 **** Q7DMS5_BRANA)%3B contains Interpro domai	at3g16030.1	| symbols: ces101 | lectin protein kinase family protein | chr3:5439609-5442802 forward	Solyc08g076060.2.1	SL2.40ch08	57278492	57281762	TES1088	57.756	57499383	TES0349	58.407	57093061	\N	\N	\N	\N	protein serine/threonine kinase activity transmembrane receptor protein kinase activity	GO:0004674 GO:0019199	NA	lectin protein kinase family protein	Solyc08g076060.2	0	0	0		0.00139639	0.360849	-2.77124	ARF2sm-42R down vs wt-42G	0	0	0
Solyc08g076220.2		ARF2sm-42R vs wt-42G diff			ARF2sm-42R down vs wt-42G		ARF2sm-42R down vs wt-42G	Phosphoribulokinase/uridine kinase (AHRD V1 ***- B7KI62_CYAP7)%3B contains Interpro dom	at1g32060.1	| symbols: prk | phosphoribulokinase | chr1:11532668-11534406 forward length=395	Solyc08g076220.2.1	SL2.40ch08	57405726	57410850	TES1088	57.756	57499383	TES0349	58.407	57093061	\N	\N	\N	\N	protein binding	GO:0005515	Calvin-Benson-Bassham cycle	phosphoribulose kinase, putative	Solyc08g076220.2	0	0	0		0.000584215	0.160955	-6.21293	ARF2sm-42R down vs wt-42G	0	0	0
Solyc08g078340.2		ARF2sm-42R vs wt-42G diff			ARF2sm-42R down vs wt-42G		ARF2sm-42R down vs wt-42G	Myb family transcription factor (AHRD V1 **** Q2A9C4_BRAOL)%3B contains Interpro domain	at5g47390.1	| symbols: | myb-like transcription factor family protein | chr5:19227001-19228546 forw	Solyc08g078340.2.1	SL2.40ch08	59322077	59325106	TGS2194	71.848	59439814	TGS0947	72.564	59096909	\N	\N	\N	\N	sequence-specific DNA binding transcription factor activity	GO:0003700	#N/A	#N/A	Solyc08g078340.2	0	0	0		0.00362686	0.374742	-2.6685	ARF2sm-42R down vs wt-42G	0	0	0
Solyc08g078760.1		ARF2sm-42R vs wt-42G diff			ARF2sm-42R down vs wt-42G		ARF2sm-42R down vs wt-42G	AT5g47580/MNJ7_17 (AHRD V1 ***- Q9FGJ9_ARATH)	at5g47580.1	| symbols: | unknown protein best arabidopsis thaliana protein match is: unknown prote	Solyc08g078760.1.1	SL2.40ch08	59659056	59661266	TES1833	74.379	59674755	TGS2819	75.365	59605564	\N	\N	\N	\N	\N	\N	#N/A	#N/A	Solyc08g078760.1	0	0	0		0.00736214	0.359274	-2.78339	ARF2sm-42R down vs wt-42G	0	0	0
Solyc08g079240.2		ARF2sm-42R vs wt-42G diff			ARF2sm-42R down vs wt-42G		ARF2sm-42R down vs wt-42G	Homology to unknown gene (AHRD V1 *-*- Q01GV2_OSTTA) Homology to unknown gene (AHRD V1	at1g62780.1	| symbols: | unknown protein functions in: molecular_function unknown involved in: bi	Solyc08g079240.2.1	SL2.40ch08	60020025	60025240	T1581	80.139	60035233	tme0030	80.702	59881936	\N	\N	\N	\N	\N	\N	#N/A	#N/A	Solyc08g079240.2	0	0	0		0.00712216	0.413888	-2.41611	ARF2sm-42R down vs wt-42G	0	0	0
Solyc08g079790.1		ARF2sm-42R vs wt-42G diff			ARF2sm-42R down vs wt-42G		ARF2sm-42R down vs wt-42G	Organic anion transporter (AHRD V1 **-* B6TX95_MAIZE)%3B contains Interpro domain(s) I	at1g12500.1	| symbols: | nucleotide-sugar transporter family protein | chr1:4263542-4264957 reverse	Solyc08g079790.1.1	SL2.40ch08	60425501	60426571	CT148	85.264	60443420	TES1883	83	60412760	\N	\N	\N	\N	organic anion transmembrane transporter activity	GO:0008514	#N/A	#N/A	Solyc08g079790.1	0	0	0		0.00196513	0.387828	-2.57846	ARF2sm-42R down vs wt-42G	0	0	0
Solyc08g079870.1		ARF2sm-42R vs wt-42G diff			ARF2sm-42R down vs wt-42G		ARF2sm-42R down vs wt-42G	Subtilisin-like protease (AHRD V1 **-- Q9LWA3_SOLLC)%3B contains Interpro domain(s) IP	at5g67360.1	| symbols: ara12 | subtilase family protein | chr5:26872192-26874465 reverse length=757	Solyc08g079870.1.1	SL2.40ch08	60466441	60468678	tme0100	84.782	60616460	CT148	85.264	60443420	\N	\N	\N	\N	serine-type endopeptidase activity	GO:0004252	#N/A	#N/A	Solyc08g079870.1	0	0	0		0.00581928	0.0746983	-13.3872	ARF2sm-42R down vs wt-42G	0	0	0
Solyc08g080050.2		ARF2sm-42R vs wt-42G diff			ARF2sm-42R down vs wt-42G		ARF2sm-42R down vs wt-42G	PGR5-like protein 1A%2C chloroplastic (AHRD V1 ***- PGL1A_ARATH)	at4g22890.2	| symbols: pgr5-like a | pgr5-like a | chr4:12007157-12009175 forward length=324	Solyc08g080050.2.1	SL2.40ch08	60555455	60559957	tme0100	84.782	60616460	CT148	85.264	60443420	\N	\N	\N	\N	\N	\N	#N/A	#N/A	Solyc08g080050.2	0	0	0		0.000530511	0.342236	-2.92196	ARF2sm-42R down vs wt-42G	0	0	0
Solyc08g080380.2		ARF2sm-42R vs wt-42G diff			ARF2sm-42R down vs wt-42G		ARF2sm-42R down vs wt-42G	Cytochrome P450	at2g45570.1	| symbols: cyp76c2 | cytochrome p450 family 76 subfamily c polypeptide 2 | chr2:1877	Solyc08g080380.2.1	SL2.40ch08	60845204	60847167	TES1535	85.724	60930879	TES0248	86.162	60842498	\N	\N	\N	\N	oxygen binding	GO:0019825	NA	Cytochrome P450	Solyc08g080380.2	0	0	0		0.00407878	0.371472	-2.692	ARF2sm-42R down vs wt-42G	0	0	0
Solyc08g083110.2		ARF2sm-42R vs wt-42G diff			ARF2sm-42R down vs wt-42G		ARF2sm-42R down vs wt-42G	Cystathionine gamma-lyase (AHRD V1 ***- D2LF58_RHOVA)%3B contains Interpro domain(s) I	at1g64660.1	| symbols: atmgl mgl | methionine gamma-lyase | chr1:24028977-24030537 forward length=	Solyc08g083110.2.1	SL2.40ch08	62836223	62839810	CT68	109.243	62924142	TES0481	106.778	62702057	cellular amino acid metabolic process	GO:0006520	\N	\N	pyridoxal phosphate binding	GO:0030170	homocysteine and cysteine interconversion	Cystathionine gamma-lyase	Solyc08g083110.2	0	0	0		0.00293365	0.221458	-4.51552	ARF2sm-42R down vs wt-42G	0	0	0
Solyc08g083320.2		ARF2sm-42R vs wt-42G diff			ARF2sm-42R down vs wt-42G		ARF2sm-42R down vs wt-42G	Granule-bound starch synthase (AHRD V1 **** B0ZTE3_SOLTU)%3B contains Interpro domain(s	at1g32900.1	| symbols: | udp-glycosyltransferase superfamily protein | chr1:11920582-11923506 rever	Solyc08g083320.2.1	SL2.40ch08	62981703	62985075	\NA	\NA	\NA	CT68	109.243	62924142	\N	\N	\N	\N	protein binding glycogen (starch) synthase activity	GO:0005515 GO:0004373	glycogen biosynthesis II (from UDP-D-Glucose)	glycogen (starch) synthase	Solyc08g083320.2	0	0	0		0.000215396	0.205085	-4.87604	ARF2sm-42R down vs wt-42G	0	0	0
Solyc09g005090.1		ARF2sm-42R vs wt-42G diff			ARF2sm-42R down vs wt-42G		ARF2sm-42R down vs wt-42G	LRR receptor-like serine/threonine-protein kinase%2C RLP	at1g47890.1	| symbols: atrlp7 rlp7 | receptor like protein 7 | chr1:17643976-17647035 forward leng	Solyc09g005090.1.1	SL2.40ch09	55478	58639	cLPT-4-C24	0	239795	\NA	\NA	\NA	\N	\N	\N	\N	kinase activity	GO:0016301	#N/A	#N/A	Solyc09g005090.1	0	0	0		0.00976359	0.222798	-4.48837	ARF2sm-42R down vs wt-42G	0	0	0
Solyc09g005320.2		ARF2sm-42R vs wt-42G diff			ARF2sm-42R down vs wt-42G		ARF2sm-42R down vs wt-42G	E3 ubiquitin-protein ligase RNF34 (AHRD V1 *--- C0H8Z5_SALSA)%3B contains Interpro doma	at5g01450.1	| symbols: | ring/u-box superfamily protein | chr5:183693-186244 reverse length=444	Solyc09g005320.2.1	SL2.40ch09	245604	252638	TES0036	4.224	733429	cLPT-4-C24	0	239795	\N	\N	\N	\N	zinc ion binding	GO:0008270	#N/A	#N/A	Solyc09g005320.2	0	0	0		0.00445189	0.4447	-2.24871	ARF2sm-42R down vs wt-42G	0	0	0
Solyc09g005750.2		ARF2sm-42R vs wt-42G diff			ARF2sm-42R down vs wt-42G		ARF2sm-42R down vs wt-42G	Os03g0819700 protein (Fragment) (AHRD V1 *-*- Q0DMA9_ORYSJ)	at3g53540.1	| symbols: | unknown protein located in: plasma membrane expressed in: 24 plant struc	Solyc09g005750.2.1	SL2.40ch09	521012	526426	TES0036	4.224	733429	cLPT-4-C24	0	239795	\N	\N	\N	\N	\N	\N	#N/A	#N/A	Solyc09g005750.2	0	0	0		0.00172685	0.404772	-2.47052	ARF2sm-42R down vs wt-42G	0	0	0
Solyc09g005850.2		ARF2sm-42R vs wt-42G diff			ARF2sm-42R down vs wt-42G		ARF2sm-42R down vs wt-42G	Pectate lyase 1 (AHRD V1 **** B3SXR0_HEVBR)%3B contains Interpro domain(s) IPR002022	at3g55140.1	| symbols: | pectin lyase-like superfamily protein | chr3:20438819-20440225 forward len	Solyc09g005850.2.1	SL2.40ch09	591874	597023	TES0036	4.224	733429	cLPT-4-C24	0	239795	\N	\N	\N	\N	pectate lyase activity	GO:0030570	NA	Probable pectate lyase 4	Solyc09g005850.2	0	0	0		6.84758e-05	0.482232	-2.07369	ARF2sm-42R down vs wt-42G	0	0	0
Solyc09g007510.1		ARF2sm-42R vs wt-42G diff			ARF2sm-42R down vs wt-42G		ARF2sm-42R down vs wt-42G	Receptor-like kinase (AHRD V1 *-*- A7VM32_MARPO)%3B contains Interpro domain(s) IPR002	at3g53380.1	| symbols: | concanavalin a-like lectin protein kinase family protein | chr3:19789204-1	Solyc09g007510.1.1	SL2.40ch09	1087365	1089107	T1641	9.185	1097342	TGS2555	10.354	1075246	protein phosphorylation	GO:0006468	\N	\N	binding	GO:0005488	NA	lectin receptor kinase-like protein	Solyc09g007510.1	0	0	0		0.0023622	0.448933	-2.2275	ARF2sm-42R down vs wt-42G	0	0	0
Solyc09g008350.2		ARF2sm-42R vs wt-42G diff			ARF2sm-42R down vs wt-42G		ARF2sm-42R down vs wt-42G	Amino acid binding protein (AHRD V1 **-- B6TMA2_MAIZE)%3B contains Interpro domain(s)	at2g36840.1	| symbols: | act-like superfamily protein | chr2:15451834-15453550 reverse length=410	Solyc09g008350.2.1	SL2.40ch09	1817453	1822095	TG9	24.348	1908973	TEI0336	15.569	1437074	metabolic process	GO:0008152	\N	\N	\N	\N	#N/A	#N/A	Solyc09g008350.2	0	0	0		0.0020709	0.265376	-3.76823	ARF2sm-42R down vs wt-42G	0	0	0
Solyc09g008650.2		ARF2sm-42R vs wt-42G diff			ARF2sm-42R down vs wt-42G		ARF2sm-42R down vs wt-42G	Peptidyl-prolyl cis-trans isomerase (AHRD V1 ***- B8HUH5_CYAP4)%3B contains Interpro do	at3g10060.1	| symbols: | fkbp-like peptidyl-prolyl cis-trans isomerase family protein | chr3:310229	Solyc09g008650.2.1	SL2.40ch09	2103668	2112469	TGS2174	26.375	2223358	T1673	26.778	2056889	\N	\N	\N	\N	FK506 binding	GO:0005528	NA	Peptidyl-prolyl cis-trans isomerase	Solyc09g008650.2	0	0	0		0.000134512	0.428972	-2.33115	ARF2sm-42R down vs wt-42G	0	0	0
Solyc09g011080.2		ARF2sm-42R vs wt-42G diff			ARF2sm-42R down vs wt-42G		ARF2sm-42R down vs wt-42G	Ribulose-1 5-bisphosphate carboxylase/oxygenase activase 1 (AHRD V1 **** Q9AXG1_GOSHI)%	at2g39730.3	| symbols: rca | rubisco activase | chr2:16571174-16573345 reverse length=441	Solyc09g011080.2.1	SL2.40ch09	4413327	4416467	TES1143	45.457	4642979	TGS0170	41.971	4412857	\N	\N	\N	\N	ribulose-1,5-bisphosphate carboxylase/oxygenase activator activity	GO:0046863	#N/A	#N/A	Solyc09g011080.2	0	0	0		0.00142686	0.258527	-3.86807	ARF2sm-42R down vs wt-42G	0	0	0
Solyc09g011720.2		ARF2sm-42R vs wt-42G diff			ARF2sm-42R down vs wt-42G		ARF2sm-42R down vs wt-42G	Unknown Protein (AHRD V1)	at5g01030.2	| symbols: | protein of unknown function (duf3527) | chr5:10638-13003 forward length=74	Solyc09g011720.2.1	SL2.40ch09	5009237	5012128	T1212	49.146	5090709	TES1143	45.457	4642979	\N	\N	\N	\N	\N	\N	#N/A	#N/A	Solyc09g011720.2	0	0	0		0.00524655	0.296802	-3.36925	ARF2sm-42R down vs wt-42G	0	0	0
Solyc09g011770.2		ARF2sm-42R vs wt-42G diff			ARF2sm-42R down vs wt-42G		ARF2sm-42R down vs wt-42G	Zinc finger family protein (Fragment) (AHRD V1 *-*- D7M766_ARALY)%3B contains Interpro	at5g05830.1	| symbols: | ring/fyve/phd zinc finger superfamily protein | chr5:1755910-1756825 forwa	Solyc09g011770.2.1	SL2.40ch09	5061936	5065593	T1212	49.146	5090709	TES1143	45.457	4642979	\N	\N	\N	\N	protein binding	GO:0005515	#N/A	#N/A	Solyc09g011770.2	0	0	0		0.00647922	0.407452	-2.45428	ARF2sm-42R down vs wt-42G	0	0	0
Solyc09g014480.1		ARF2sm-42R vs wt-42G diff			ARF2sm-42R down vs wt-42G		ARF2sm-42R down vs wt-42G	Polygalacturonase inhibitor protein (AHRD V1 ***- Q40160_SOLLC)%3B contains Interpro do	at5g06870.1	| symbols: pgip2 atpgip2 | polygalacturonase inhibiting protein 2 | chr5:2133941-21350	Solyc09g014480.1.1	SL2.40ch09	6096749	6097756	TGS1629	50.609	6408618	TGS1315	37.381	5341515	\N	\N	\N	\N	transmembrane receptor protein serine/threonine kinase activity	GO:0004675	#N/A	#N/A	Solyc09g014480.1	0	0	0		0.00329631	0.375324	-2.66436	ARF2sm-42R down vs wt-42G	0	0	0
Solyc09g056030.1		ARF2sm-42R vs wt-42G diff			ARF2sm-42R down vs wt-42G		ARF2sm-42R down vs wt-42G	Unknown Protein (AHRD V1)													\N	\N	\N	\N	\N	\N	#N/A	#N/A	Solyc09g056030.1	0	0	0		0.00985301	0.495343	-2.0188	ARF2sm-42R down vs wt-42G	0	0	0
Solyc09g060100.2		ARF2sm-42R vs wt-42G diff			ARF2sm-42R down vs wt-42G		ARF2sm-42R down vs wt-42G	Unknown Protein (AHRD V1)	at4g13150.1	| symbols: | unknown protein has 83 blast hits to 82 proteins in 37 species: archae -	Solyc09g060100.2.1	SL2.40ch09	53199293	53204655	TGS0213	54.178	54045333	TES1378	51.254	52621709	\N	\N	\N	\N	\N	\N	#N/A	#N/A	Solyc09g060100.2	0	0	0		0.00258011	0.426222	-2.34619	ARF2sm-42R down vs wt-42G	0	0	0
Solyc09g065200.2		ARF2sm-42R vs wt-42G diff			ARF2sm-42R down vs wt-42G		ARF2sm-42R down vs wt-42G	Cyclin-dependent kinase (AHRD V1 **** A6YTD1_CUCME)%3B contains Interpro domain(s) IPR	at3g63120.1	| symbols: cycp1 1 | cyclin p1 1 | chr3:23323143-23323893 reverse length=221	Solyc09g065200.2.1	SL2.40ch09	58774954	58777893	TES0184	46.632	58817278	CD3	53.61	58707699	\N	\N	\N	\N	cyclin-dependent protein kinase activity	GO:0004693	NA	cyclin-dependent protein kinase	Solyc09g065200.2	0	0	0		0.00208472	0.414593	-2.41201	ARF2sm-42R down vs wt-42G	0	0	0
Solyc09g065840.2		ARF2sm-42R vs wt-42G diff			ARF2sm-42R down vs wt-42G		ARF2sm-42R down vs wt-42G	Single-stranded DNA binding protein (AHRD V1 **** D7KGI0_ARALY)%3B contains Interpro do	at1g47720.1	| symbols: osb1 | primosome prib/single-strand dna-binding | chr1:17561514-17562859 rev	Solyc09g065840.2.1	SL2.40ch09	59709509	59713431	T556	54.456	59801003	T565	53.646	59705601	\N	\N	\N	\N	single-stranded DNA binding	GO:0003697	#N/A	#N/A	Solyc09g065840.2	0	0	0		0.000365656	0.414637	-2.41175	ARF2sm-42R down vs wt-42G	0	0	0
Solyc09g074050.2		ARF2sm-42R vs wt-42G diff			ARF2sm-42R down vs wt-42G		ARF2sm-42R down vs wt-42G	Oxidoreductase (AHRD V1 ***- D7M3B5_ARALY)	at4g02940.1	| symbols: | oxidoreductase 2og-fe(ii) oxygenase family protein | chr4:1306658-1310699	Solyc09g074050.2.1	SL2.40ch09	61246545	61253456	TEI0742	57.971	61556437	T182	55.517	61158035	\N	\N	\N	\N	\N	\N	#N/A	#N/A	Solyc09g074050.2	0	0	0		0.00268785	0.485969	-2.05774	ARF2sm-42R down vs wt-42G	0	0	0
Solyc09g074610.2		ARF2sm-42R vs wt-42G diff			ARF2sm-42R down vs wt-42G		ARF2sm-42R down vs wt-42G	Chaperone protein dnaJ (AHRD V1 *-*- B7GKC9_ANOFW)%3B contains Interpro domain(s) IPR0													\N	\N	\N	\N	heat shock protein binding	GO:0031072	#N/A	#N/A	Solyc09g074610.2	0	0	0		0.000367939	0.447539	-2.23444	ARF2sm-42R down vs wt-42G	0	0	0
Solyc09g083190.2		ARF2sm-42R vs wt-42G diff			ARF2sm-42R down vs wt-42G		ARF2sm-42R down vs wt-42G	Genomic DNA chromosome 5 P1 clone MQD19 (AHRD V1 ***- Q9FG89_ARATH)	at5g43750.1	| symbols: ndh18 | nad(p)h dehydrogenase 18 | chr5:17580100-17581145 reverse length=212	Solyc09g083190.2.1	SL2.40ch09	64266291	64268554	TES0252	72.459	64365863	TES1674	71.523	64207085	\N	\N	\N	\N	\N	\N	#N/A	#N/A	Solyc09g083190.2	0	0	0		0.00118904	0.105087	-9.51593	ARF2sm-42R down vs wt-42G	0	0	0
Solyc09g090190.2		ARF2sm-42R vs wt-42G diff			ARF2sm-42R down vs wt-42G		ARF2sm-42R down vs wt-42G	Dehydration-responsive protein-like (AHRD V1 **-- Q653G1_ORYSJ)%3B contains Interpro do	at4g14360.2	| symbols: | s-adenosyl-l-methionine-dependent methyltransferases superfamily protein |	Solyc09g090190.2.1	SL2.40ch09	65089763	65093797	tme0004	82.945	65211593	TES0871	82.237	65053209	\N	\N	\N	\N	\N	\N	#N/A	#N/A	Solyc09g090190.2	0	0	0		0.000667812	0.246035	-4.06447	ARF2sm-42R down vs wt-42G	0	0	0
Solyc09g090730.1		ARF2sm-42R vs wt-42G diff			ARF2sm-42R down vs wt-42G		ARF2sm-42R down vs wt-42G	Ammonium transporter (AHRD V1 **** Q09J80_9ROSI)%3B contains Interpro domain(s) IPR001	at4g13510.1	| symbols: amt1 1 atamt1 atamt1 1 | ammonium transporter 1 1 | chr4:7858220-7859725 f	Solyc09g090730.1.1	SL2.40ch09	65513401	65514873	TES0562	92.726	65871729	TG424	83.701	65429631	\N	\N	\N	\N	high affinity secondary active ammonium transmembrane transporter activity	GO:0015398	ammonium transport	ammonium transporter	Solyc09g090730.1	0	0	0		0.00506954	0.318557	-3.13916	ARF2sm-42R down vs wt-42G	0	0	0
Solyc09g091980.2		ARF2sm-42R vs wt-42G diff			ARF2sm-42R down vs wt-42G		ARF2sm-42R down vs wt-42G	N-alpha-acetyltransferase 30%2C NatC catalytic subunit (AHRD V1 **** NAA30_DROME)%3B co	at2g38130.2	| symbols: atmak3 | acyl-coa n-acyltransferases (nat) superfamily protein | chr2:159786	Solyc09g091980.2.1	SL2.40ch09	66517949	66522458	TES0544	99.088	66560400	TES0889	99.088	66513258	\N	\N	\N	\N	identical protein binding peptide alpha-N-acetyltransferase activity	GO:0042802 GO:0004596	NA	peptide alpha-N-acetyltransferase	Solyc09g091980.2	0	0	0		0.00073264	0.452488	-2.21	ARF2sm-42R down vs wt-42G	0	0	0
Solyc09g097840.1		ARF2sm-42R vs wt-42G diff			ARF2sm-42R down vs wt-42G		ARF2sm-42R down vs wt-42G	Pentatricopeptide repeat-containing protein (AHRD V1 ***- D7LXU6_ARALY)%3B contains Int	at5g18390.1	| symbols: | pentatricopeptide repeat (ppr) superfamily protein | chr5:6090954-6092333	Solyc09g097840.1.1	SL2.40ch09	67113261	67114673	TES1576	96.082	67115580	TES1037	95.979	67077096	\N	\N	\N	\N	\N	\N	#N/A	#N/A	Solyc09g097840.1	0	0	0		0.00399629	0.399423	-2.50361	ARF2sm-42R down vs wt-42G	0	0	0
Solyc09g098360.2		ARF2sm-42R vs wt-42G diff			ARF2sm-42R down vs wt-42G		ARF2sm-42R down vs wt-42G	Ribosome biogenesis protein NSA2 (AHRD V1 **** D0MUX0_PHYIN)%3B contains Interpro domai	at5g06360.1	| symbols: | ribosomal protein s8e family protein | chr5:1944835-1946512 forward length	Solyc09g098360.2.1	SL2.40ch09	67468841	67472791	tma0229	109.033	67585378	TES0842	94.525	67136703	\N	\N	\N	\N	structural constituent of ribosome protein binding	GO:0003735 GO:0005515	#N/A	#N/A	Solyc09g098360.2	0	0	0		5.61436e-05	0.48337	-2.06881	ARF2sm-42R down vs wt-42G	0	0	0
Solyc10g005810.2		ARF2sm-42R vs wt-42G diff			ARF2sm-42R down vs wt-42G		ARF2sm-42R down vs wt-42G	Farnesyl pyrophosphate synthase (AHRD V1 ***- Q4TTY7_9APIA)%3B contains Interpro domain	at4g17190.1	| symbols: fps2 | farnesyl diphosphate synthase 2 | chr4:9648743-9650865 reverse length	Solyc10g005810.2.1	SL2.40ch10	639074	642231	TG230	0	1022915	\NA	\NA	\NA	\N	\N	\N	\N	geranyltranstransferase activity	GO:0004337	<i>trans,trans</i>-farnesyl diphosphate biosynthesis	farnesyl diphosphate synthase	Solyc10g005810.2	0	0	0		0.00184537	0.462596	-2.16171	ARF2sm-42R down vs wt-42G	0	0	0
Solyc10g006230.2		ARF2sm-42R vs wt-42G diff			ARF2sm-42R down vs wt-42G		ARF2sm-42R down vs wt-42G	Chlorophyll a-b binding protein 7%2C chloroplastic (AHRD V1 ***- CB12_SOLLC)%3B contain	at3g61470.1	| symbols: lhca2 | photosystem i light harvesting complex gene 2 | chr3:22745736-227470	Solyc10g006230.2.1	SL2.40ch10	920027	923670	TG230	0	1022915	\NA	\NA	\NA	\N	\N	membrane	GO:0016020	\N	\N	#N/A	#N/A	Solyc10g006230.2	0	0	0		0.00233447	0.200143	-4.99642	ARF2sm-42R down vs wt-42G	0	0	0
Solyc10g006910.1		ARF2sm-42R vs wt-42G diff			ARF2sm-42R down vs wt-42G		ARF2sm-42R down vs wt-42G	50S ribosomal protein L16 chloroplastic (AHRD V1 ***- D3WCG3_NEROL)%3B contains Interpr													translation	GO:0006412	ribosome	GO:0005840	\N	\N	#N/A	#N/A	Solyc10g006910.1	0	0	0		0.00732783	0.469234	-2.13113	ARF2sm-42R down vs wt-42G	0	0	0
Solyc10g007030.1		ARF2sm-42R vs wt-42G diff			ARF2sm-42R down vs wt-42G		ARF2sm-42R down vs wt-42G	Genomic DNA chromosome 3 TAC clone K7L4 (AHRD V1 ***- Q9LJR0_ARATH)	at1g53035.1	| symbols: | unknown protein functions in: molecular_function unknown involved in: bi	Solyc10g007030.1.1	SL2.40ch10	1427543	1427980	TES1154	8.266	1428710	TES1454	5.702	1225374	\N	\N	\N	\N	\N	\N	#N/A	#N/A	Solyc10g007030.1	0	0	0		0.00603424	0.389639	-2.56648	ARF2sm-42R down vs wt-42G	0	0	0
Solyc10g007720.2		ARF2sm-42R vs wt-42G diff			ARF2sm-42R down vs wt-42G		ARF2sm-42R down vs wt-42G	Conserved oligomeric Golgi complex subunit 5 (AHRD V1 ***- COG5_HUMAN)%3B contains Inte	at1g67930.1	| symbols: | golgi transport complex protein-related | chr1:25474218-25477332 reverse l	Solyc10g007720.2.1	SL2.40ch10	1967084	1974413	TG395	6.083	2313209	T1391	19.366	1947905	\N	\N	\N	\N	protein binding	GO:0005515	#N/A	#N/A	Solyc10g007720.2	0	0	0		0.0019414	0.468231	-2.1357	ARF2sm-42R down vs wt-42G	0	0	0
Solyc10g009030.2		ARF2sm-42R vs wt-42G diff			ARF2sm-42R down vs wt-42G		ARF2sm-42R down vs wt-42G	Sphingolipid delta 4 desaturase (AHRD V1 **** Q5AJX2_CANAL)%3B contains Interpro domain	at4g04930.1	| symbols: des-1-like | fatty acid desaturase family protein | chr4:2509236-2510918 for	Solyc10g009030.2.1	SL2.40ch10	3056358	3059101	TGS1921	27.281	3285779	TES0440	22.625	3005580	\N	\N	\N	\N	sphingolipid delta-4 desaturase activity	GO:0042284	#N/A	#N/A	Solyc10g009030.2	0	0	0		0.00466922	0.288468	-3.46659	ARF2sm-42R down vs wt-42G	0	0	0
Solyc10g017850.2		ARF2sm-42R vs wt-42G diff			ARF2sm-42R down vs wt-42G		ARF2sm-42R down vs wt-42G	Peroxisomal membrane protein 11-1 (AHRD V1 ***- PX111_ORYSJ)%3B contains Interpro domai	at1g01820.1	| symbols: pex11c | peroxin 11c | chr1:296213-297723 reverse length=235	Solyc10g017850.2.1	SL2.40ch10	6046481	6049651	TGS0725	34.255	6383493	TGS1539	32.057	5715948	\N	\N	peroxisomal membrane	GO:0005778	\N	\N	#N/A	#N/A	Solyc10g017850.2	0	0	0		0.00589163	0.404147	-2.47435	ARF2sm-42R down vs wt-42G	0	0	0
Solyc10g049640.1		ARF2sm-42R vs wt-42G diff			ARF2sm-42R down vs wt-42G		ARF2sm-42R down vs wt-42G	Amino acid permease (Fragment) (AHRD V1 ***- B8C3S3_THAPS)%3B contains Interpro domain(	at3g19553.1	| symbols: | amino acid permease family protein | chr3:6790988-6792507 reverse length=4	Solyc10g049640.1.1	SL2.40ch10	41787315	41789243	TEI0123	31.667	41902938	TES1169	31.762	41777248	\N	\N	membrane	GO:0016020	\N	\N	#N/A	#N/A	Solyc10g049640.1	0	0	0		0.000367044	0.425466	-2.35036	ARF2sm-42R down vs wt-42G	0	0	0
Solyc10g050160.1		ARF2sm-42R vs wt-42G diff			ARF2sm-42R down vs wt-42G		ARF2sm-42R down vs wt-42G	Caffeoyl-CoA 3-O-methyltransferase (AHRD V1 **** A6XBP7_BRARP)%3B contains Interpro dom	at4g34050.1	| symbols: ccoaomt1 | s-adenosyl-l-methionine-dependent methyltransferases superfamily	Solyc10g050160.1.1	SL2.40ch10	43521248	43524420	TGS1263	31.765	43629673	TGS0551	32.33	43344012	\N	\N	\N	\N	catechol O-methyltransferase activity caffeoyl-CoA O-methyltransferase activity	GO:0016206 GO:0042409	suberin biosynthesis	caffeoyl-CoA O-methyltransferase	Solyc10g050160.1	0	0	0		0.00754753	0.357279	-2.79894	ARF2sm-42R down vs wt-42G	0	0	0
Solyc10g051110.1		ARF2sm-42R vs wt-42G diff			ARF2sm-42R down vs wt-42G		ARF2sm-42R down vs wt-42G	NAD dependent epimerase/dehydratase family protein (AHRD V1 *--- B0CAN3_ACAM1)%3B conta	at3g18890.1	| symbols: | nad(p)-binding rossmann-fold superfamily protein | chr3:6511169-6514729 fo	Solyc10g051110.1.1	SL2.40ch10	46996626	47003804	TES0950	31.762	47515555	TEI0220	20.414	46854324	metabolic process	GO:0008152	\N	\N	\N	\N	#N/A	#N/A	Solyc10g051110.1	0	0	0		2.85625e-05	0.382037	-2.61754	ARF2sm-42R down vs wt-42G	0	0	0
Solyc10g051240.1		ARF2sm-42R vs wt-42G diff			ARF2sm-42R down vs wt-42G		ARF2sm-42R down vs wt-42G	LRR receptor-like serine/threonine-protein kinase%2C RLP													\N	\N	\N	\N	protein binding	GO:0005515	#N/A	#N/A	Solyc10g051240.1	0	0	0		0.00696225	0.423592	-2.36076	ARF2sm-42R down vs wt-42G	0	0	0
Solyc10g054280.1		ARF2sm-42R vs wt-42G diff			ARF2sm-42R down vs wt-42G		ARF2sm-42R down vs wt-42G	Haloacid dehalogenase-like hydrolase family protein (AHRD V1 ***- A8PMG5_BRUMA)%3B cont	at4g25840.1	| symbols: gpp1 | glycerol-3-phosphatase 1 | chr4:13139026-13140719 forward length=298	Solyc10g054280.1.1	SL2.40ch10	50660995	50672538	TGS0938	32.709	51259732	TES0393	31.632	49924064	metabolic process	GO:0008152	\N	\N	hydrolase activity	GO:0016787	flavin biosynthesis	hydrolase	Solyc10g054280.1	0	0	0		0.00655629	0.433696	-2.30576	ARF2sm-42R down vs wt-42G	0	0	0
Solyc10g054420.1		ARF2sm-42R vs wt-42G diff			ARF2sm-42R down vs wt-42G		ARF2sm-42R down vs wt-42G	Photosystem II oxygen evolving complex protein PsbP (AHRD V1 ***- A0YXJ6_LYNSP)%3B cont	at2g39470.2	| symbols: ppl2 | psbp-like protein 2 | chr2:16476335-16477653 forward length=230	Solyc10g054420.1.1	SL2.40ch10	50836162	50837363	TGS0938	32.709	51259732	TES0393	31.632	49924064	\N	\N	extrinsic to membrane	GO:0019898	\N	\N	#N/A	#N/A	Solyc10g054420.1	0	0	0		0.00278677	0.452209	-2.21137	ARF2sm-42R down vs wt-42G	0	0	0
Solyc10g074790.1		ARF2sm-42R vs wt-42G diff			ARF2sm-42R down vs wt-42G		ARF2sm-42R down vs wt-42G	Auxin efflux carrier family protein (AHRD V1 ***- D7M6D2_ARALY)%3B contains Interpro do	at5g01990.1	| symbols: | auxin efflux carrier family protein | chr5:377373-379600 reverse length=43	Solyc10g074790.1.1	SL2.40ch10	57831763	57835787	TEI0683	29.111	58015976	TES0487	28.816	57652057	\N	\N	integral to membrane	GO:0016021	\N	\N	#N/A	#N/A	Solyc10g074790.1	0	0	0		0.000710171	0.437622	-2.28508	ARF2sm-42R down vs wt-42G	0	0	0
Solyc10g075070.1		ARF2sm-42R vs wt-42G diff			ARF2sm-42R down vs wt-42G		ARF2sm-42R down vs wt-42G	Non-specific lipid-transfer protein (AHRD V1 ***- A7UGG9_SOLTU)%3B contains Interpro do	at2g38540.1	| symbols: lp1 ltp1 atltp1 | lipid transfer protein 1 | chr2:16130418-16130893 forwar	Solyc10g075070.1.1	SL2.40ch10	58109657	58110129	tma0147	31.801	58658365	TEI0683	29.111	58015976	lipid transport	GO:0006869	\N	\N	\N	\N	#N/A	#N/A	Solyc10g075070.1	0	0	0		0.00218488	0.0474087	-21.0932	ARF2sm-42R down vs wt-42G	0	0	0
Solyc10g076250.1		ARF2sm-42R vs wt-42G diff			ARF2sm-42R down vs wt-42G		ARF2sm-42R down vs wt-42G	Aminotransferase like protein (AHRD V1 ***- Q0WWF1_ARATH)%3B contains Interpro domain(s	at3g08860.1	| symbols: pyd4 | pyrimidine 4 | chr3:2696754-2699087 reverse length=481	Solyc10g076250.1.1	SL2.40ch10	58474750	58478564	tma0147	31.801	58658365	TEI0683	29.111	58015976	\N	\N	\N	\N	pyridoxal phosphate binding	GO:0030170	&beta;-alanine biosynthesis II	Aminotransferase like protein	Solyc10g076250.1	0	0	0		0.00039695	0.485804	-2.05844	ARF2sm-42R down vs wt-42G	0	0	0
Solyc10g077130.1		ARF2sm-42R vs wt-42G diff			ARF2sm-42R down vs wt-42G		ARF2sm-42R down vs wt-42G	Atcambp25-binding protein OF (AHRD V1 ***- D7LGI4_ARALY)%3B contains Interpro domain(s)	at3g56880.1	| symbols: | vq motif-containing protein | chr3:21060044-21060781 forward length=245	Solyc10g077130.1.1	SL2.40ch10	59327643	59328260	TES1407	42.911	59458437	T571	42.587	59320723	\N	\N	\N	\N	\N	\N	#N/A	#N/A	Solyc10g077130.1	0	0	0		0.00557979	0.431148	-2.31939	ARF2sm-42R down vs wt-42G	0	0	0
Solyc10g078590.1		ARF2sm-42R vs wt-42G diff			ARF2sm-42R down vs wt-42G		ARF2sm-42R down vs wt-42G	Unknown Protein (AHRD V1)	at5g18130.1	| symbols: | unknown protein best arabidopsis thaliana protein match is: unknown prote	Solyc10g078590.1.1	SL2.40ch10	59689717	59691185	T246	44.525	59723570	TGS2241	43.774	59493877	\N	\N	\N	\N	\N	\N	#N/A	#N/A	Solyc10g078590.1	0	0	0		0.00717146	0.491138	-2.03609	ARF2sm-42R down vs wt-42G	0	0	0
Solyc10g080500.1		ARF2sm-42R vs wt-42G diff			ARF2sm-42R down vs wt-42G		ARF2sm-42R down vs wt-42G	Actin (AHRD V1 ***- B5M4V6_TOBAC)%3B contains Interpro domain(s) IPR004000 Actin/acti	at3g12110.1	| symbols: act11 | actin-11 | chr3:3858116-3859609 forward length=377 | symbols: act11	Solyc10g080500.1.1	SL2.40ch10	61081201	61082937	cTOB-8-M7	53.089	61137658	TES0140	50.359	60468724	\N	\N	\N	\N	ATP binding protein binding	GO:0005524 GO:0005515	#N/A	#N/A	Solyc10g080500.1	0	0	0		0.000578996	0.472071	-2.11833	ARF2sm-42R down vs wt-42G	0	0	0
Solyc10g080680.1		ARF2sm-42R vs wt-42G diff			ARF2sm-42R down vs wt-42G		ARF2sm-42R down vs wt-42G	Adenylyl-sulfate kinase (AHRD V1 ***- B9SHF5_RICCO)%3B contains Interpro domain(s) IPR	at3g03900.1	| symbols: apk3 | adenosine-5 -phosphosulfate (aps) kinase 3 | chr3:1002975-1004271 rev	Solyc10g080680.1.1	SL2.40ch10	61217572	61219659	TGS0841	50.67	61278742	TGS1217	50.971	61140091	sulfate assimilation	GO:0000103	\N	\N	\N	\N	sulfate activation for sulfonation	transferase, transferring phosphorus-containing groups//kinase	Solyc10g080680.1	0	0	0		0.00920299	0.41682	-2.39912	ARF2sm-42R down vs wt-42G	0	0	0
Solyc10g084280.1		ARF2sm-42R vs wt-42G diff			ARF2sm-42R down vs wt-42G		ARF2sm-42R down vs wt-42G	Calmodulin-binding protein (AHRD V1 *--* C5HYF8_BRARP)%3B contains Interpro domain(s)	at5g03040.3	| symbols: iqd2 | iq-domain 2 | chr5:710380-712406 reverse length=461 | symbols: iqd2 |	Solyc10g084280.1.1	SL2.40ch10	63223672	63226246	TGS1282	74.736	63645040	TES0250	70.835	63174077	\N	\N	\N	\N	calmodulin binding	GO:0005516	#N/A	#N/A	Solyc10g084280.1	0	0	0		0.00398601	0.186965	-5.34861	ARF2sm-42R down vs wt-42G	0	0	0
Solyc10g084660.1		ARF2sm-42R vs wt-42G diff			ARF2sm-42R down vs wt-42G		ARF2sm-42R down vs wt-42G	Actin-depolymerizing factor (AHRD V1 ***- D9I9X9_HEVBR)%3B contains Interpro domain(s)	at5g59890.1	| symbols: adf4 atadf4 | actin depolymerizing factor 4 | chr5:24122545-24123596 forwar	Solyc10g084660.1.1	SL2.40ch10	63427715	63429897	TGS1282	74.736	63645040	TES0250	70.835	63174077	\N	\N	intracellular	GO:0005622	\N	\N	#N/A	#N/A	Solyc10g084660.1	0	0	0		0.00596211	0.476585	-2.09826	ARF2sm-42R down vs wt-42G	0	0	0
Solyc10g085000.1		ARF2sm-42R vs wt-42G diff			ARF2sm-42R down vs wt-42G		ARF2sm-42R down vs wt-42G	Receptor-like kinase (AHRD V1 ***- C0SW32_SOYBN)%3B contains Interpro domain(s) IPR002	at5g59010.1	| symbols: | protein kinase protein with tetratricopeptide repeat domain | chr5:2382057	Solyc10g085000.1.1	SL2.40ch10	63669940	63674284	T1521	77.922	63937147	TGS1282	74.736	63645040	protein phosphorylation	GO:0006468	\N	\N	binding	GO:0005488	NA	Receptor-like kinase	Solyc10g085000.1	0	0	0		0.00108509	0.187271	-5.33984	ARF2sm-42R down vs wt-42G	0	0	0
Solyc10g085460.1		ARF2sm-42R vs wt-42G diff			ARF2sm-42R down vs wt-42G		ARF2sm-42R down vs wt-42G	Cc-nbs-lrr%2C resistance protein	at3g14470.1	| symbols: | nb-arc domain-containing disease resistance protein | chr3:4857940-4861104	Solyc10g085460.1.1	SL2.40ch10	63950789	63954634	TEI0282	78.489	63964652	T1521	77.922	63937147	\N	\N	\N	\N	protein binding	GO:0005515	#N/A	#N/A	Solyc10g085460.1	0	0	0		0.000830805	0.38877	-2.57222	ARF2sm-42R down vs wt-42G	0	0	0
Solyc10g086150.1		ARF2sm-42R vs wt-42G diff			ARF2sm-42R down vs wt-42G		ARF2sm-42R down vs wt-42G	Single-stranded DNA binding protein (AHRD V1 **-* Q8W214_SOLTU)%3B contains Interpro do	at2g37220.1	| symbols: | rna-binding (rrm/rbd/rnp motifs) family protein | chr2:15634980-15636331 r	Solyc10g086150.1.1	SL2.40ch10	64403180	64404803	T724	86.071	64600506	TES0718	83.603	64374328	\N	\N	\N	\N	single-stranded telomeric DNA binding	GO:0043047	#N/A	#N/A	Solyc10g086150.1	0	0	0		0.0006933	0.270988	-3.6902	ARF2sm-42R down vs wt-42G	0	0	0
Solyc10g086520.1		ARF2sm-42R vs wt-42G diff			ARF2sm-42R down vs wt-42G		ARF2sm-42R down vs wt-42G	Expansin-1 (AHRD V1 ***- Q6RX69_PETHY)%3B contains Interpro domain(s) IPR002963 Expan	at2g37640.1	| symbols: atexpa3 atexp3 athexp alpha 1.9 exp3 | barwin-like endoglucanases superfa	Solyc10g086520.1.1	SL2.40ch10	64635036	64636416	TG233	86.071	64682393	T724	86.071	64600506	plant-type cell wall organization	GO:0009664	extracellular region	GO:0005576	\N	\N	#N/A	#N/A	Solyc10g086520.1	0	0	0		0.000578973	0.124247	-8.04849	ARF2sm-42R down vs wt-42G	0	0	0
Solyc10g086580.1		ARF2sm-42R vs wt-42G diff			ARF2sm-42R down vs wt-42G		ARF2sm-42R down vs wt-42G	Ribulose-1 5-bisphosphate carboxylase/oxygenase activase 1 (AHRD V1 ***- Q9AXG1_GOSHI)%	at2g39730.3	| symbols: rca | rubisco activase | chr2:16571174-16573345 reverse length=441	Solyc10g086580.1.1	SL2.40ch10	64688483	64690961	\NA	\NA	\NA	TES1966	88.916	64684524	\N	\N	\N	\N	ATP binding	GO:0005524	#N/A	#N/A	Solyc10g086580.1	0	0	0		0.00102029	0.424429	-2.3561	ARF2sm-42R down vs wt-42G	0	0	0
Solyc11g005080.1		ARF2sm-42R vs wt-42G diff			ARF2sm-42R down vs wt-42G		ARF2sm-42R down vs wt-42G	Protein tolB (AHRD V1 *-*- D5MJZ0_9BACT)%3B contains Interpro domain(s) IPR011042 Six	at1g21680.1	| symbols: | dpp6 n-terminal domain-like protein | chr1:7613028-7615148 forward length=	Solyc11g005080.1.1	SL2.40ch11	67045	69072	P47	0	107967	\NA	\NA	\NA	\N	\N	\N	\N	\N	\N	#N/A	#N/A	Solyc11g005080.1	0	0	0		0.00711109	0.45777	-2.1845	ARF2sm-42R down vs wt-42G	0	0	0
Solyc11g007430.1		ARF2sm-42R vs wt-42G diff			ARF2sm-42R down vs wt-42G		ARF2sm-42R down vs wt-42G	Stress-induced receptor-like kinase (AHRD V1 *-*- C6FF75_SOYBN)	none	none	Solyc11g007430.1.1	SL2.40ch11	1747760	1748176	TGS0794	26.772	1851157	TGS2073	24.297	1739367	\N	\N	\N	\N	\N	\N	#N/A	#N/A	Solyc11g007430.1	0	0	0		0.00659037	0.214322	-4.66588	ARF2sm-42R down vs wt-42G	0	0	0
Solyc11g007610.1		ARF2sm-42R vs wt-42G diff			ARF2sm-42R down vs wt-42G		ARF2sm-42R down vs wt-42G	DEAD-box ATP-dependent RNA helicase 5 (AHRD V1 *-*- RH5_ORYSJ)%3B contains Interpro dom	at2g28600.1	| symbols: | p-loop containing nucleoside triphosphate hydrolases superfamily protein |	Solyc11g007610.1.1	SL2.40ch11	1862726	1866719	TES1229	22.173	1980770	TGS0794	26.772	1851157	\N	\N	\N	\N	ATP-dependent helicase activity	GO:0008026	#N/A	#N/A	Solyc11g007610.1	0	0	0		0.00417934	0.455425	-2.19575	ARF2sm-42R down vs wt-42G	0	0	0
Solyc11g010390.1		ARF2sm-42R vs wt-42G diff			ARF2sm-42R down vs wt-42G		ARF2sm-42R down vs wt-42G	Unknown Protein (AHRD V1)	at4g09030.1	| symbols: agp10 atagp10 | arabinogalactan protein 10 | chr4:5792249-5792632 forward l	Solyc11g010390.1.1	SL2.40ch11	3466235	3466654	TGS1281	46.142	3586347	TES1001	32.18	3406749	\N	\N	\N	\N	\N	\N	#N/A	#N/A	Solyc11g010390.1	0	0	0		0.00390431	0.446007	-2.24212	ARF2sm-42R down vs wt-42G	0	0	0
Solyc11g012790.1		ARF2sm-42R vs wt-42G diff			ARF2sm-42R down vs wt-42G		ARF2sm-42R down vs wt-42G	SEC14-like protein 1 (AHRD V1 **-- B6TAH4_MAIZE)%3B contains Interpro domain(s) IPR001	at1g55840.1	| symbols: | sec14p-like phosphatidylinositol transfer family protein | chr1:20873891-2	Solyc11g012790.1.1	SL2.40ch11	5558186	5562111	TGS0606	68.959	5563820	TGS2218	56.852	5518683	\N	\N	\N	\N	\N	\N	#N/A	#N/A	Solyc11g012790.1	0	0	0		0.000270519	0.411145	-2.43223	ARF2sm-42R down vs wt-42G	0	0	0
Solyc11g013150.1		ARF2sm-42R vs wt-42G diff			ARF2sm-42R down vs wt-42G		ARF2sm-42R down vs wt-42G	GRAS family transcription factor (AHRD V1 **-- B9H7C5_POPTR)%3B contains Interpro domai	at4g08250.1	| symbols: | gras family transcription factor | chr4:5196787-5198238 forward length=483	Solyc11g013150.1.1	SL2.40ch11	6017978	6019441	T675	62.081	6038878	C2_At4g08230	61.859	5953344	\N	\N	\N	\N	\N	\N	#N/A	#N/A	Solyc11g013150.1	0	0	0		5.70066e-05	0.497102	-2.01166	ARF2sm-42R down vs wt-42G	0	0	0
Solyc11g013270.1		ARF2sm-42R vs wt-42G diff			ARF2sm-42R down vs wt-42G		ARF2sm-42R down vs wt-42G	Os01g0841200 protein (Fragment) (AHRD V1 **-- Q0JHU9_ORYSJ)%3B contains Interpro domain	at1g38131.1	| symbols: | o-fucosyltransferase family protein | chr1:14293392-14296020 reverse lengt	Solyc11g013270.1.1	SL2.40ch11	6174328	6179893	TES1060	68.719	6321147	TGS2103	62.004	6172765	\N	\N	\N	\N	\N	\N	#N/A	#N/A	Solyc11g013270.1	0	0	0		0.00996913	0.299109	-3.34327	ARF2sm-42R down vs wt-42G	0	0	0
Solyc11g018550.2		ARF2sm-42R vs wt-42G diff			ARF2sm-42R down vs wt-42G		ARF2sm-42R down vs wt-42G	Thylakoid-bound ascorbate peroxidase 6 Thylakoid-bound ascorbate peroxidase 6 Thylakoid	at1g77490.1	| symbols: tapx | thylakoidal ascorbate peroxidase | chr1:29117688-29120046 forward len	Solyc11g018550.2.1	SL2.40ch11	8668547	8674999	TES0246	63.672	8740250	TES0281	65.894	8347900	\N	\N	\N	\N	voltage-gated chloride channel activity cytochrome-c peroxidase activity L-ascorbate pe	GO:0005247 GO:0004130 GO:0016688	NA	cytochrome-c peroxidase	Solyc11g018550.2	0	0	0		0.00538911	0.390666	-2.55973	ARF2sm-42R down vs wt-42G	0	0	0
Solyc11g018690.1		ARF2sm-42R vs wt-42G diff			ARF2sm-42R down vs wt-42G		ARF2sm-42R down vs wt-42G	ABC transporter G family member 25 (AHRD V1 ***- AB25G_ARATH)%3B contains Interpro doma	at1g71960.1	| symbols: abcg25 atabcg25 | atp-binding casette family g25 | chr1:27082587-27088163 r	Solyc11g018690.1.1	SL2.40ch11	8960496	8964403	TEI0690	67.585	10015705	TES0246	63.672	8740250	\N	\N	\N	\N	iron-chelate-transporting ATPase activity	GO:0015623	NA	iron-chelate-transporting ATPase	Solyc11g018690.1	0	0	0		0.00254631	0.435096	-2.29835	ARF2sm-42R down vs wt-42G	0	0	0
Solyc11g020230.1		ARF2sm-42R vs wt-42G diff			ARF2sm-42R down vs wt-42G		ARF2sm-42R down vs wt-42G	Pto-like%2C Serine/threonine kinase protein%2C resistance protein Pto-like%2C Serine/th	at5g47850.1	| symbols: ccr4 | crinkly4 related 4 | chr5:19378803-19381058 reverse length=751 | symb	Solyc11g020230.1.1	SL2.40ch11	10541737	10544073	TES1722	67.274	10856481	TEI0690	67.585	10015705	\N	\N	\N	\N	protein homodimerization activity protein kinase activity	GO:0042803 GO:0004672	NA	cytokinin-regulated kinase 1	Solyc11g020230.1	0	0	0		0.00828403	0.175776	-5.68905	ARF2sm-42R down vs wt-42G	0	0	0
Solyc11g020960.1		ARF2sm-42R vs wt-42G diff			ARF2sm-42R down vs wt-42G		ARF2sm-42R down vs wt-42G	Proteinase inhibitor II (AHRD V1 ***- B3F0C1_TOBAC)%3B contains Interpro domain(s) IPR	at1g72060.1	| symbols: | serine-type endopeptidase inhibitors | chr1:27118494-27118843 forward leng	Solyc11g020960.1.1	SL2.40ch11	12996643	12997161	TGS0285	69.37	13429001	TGS2393	55.542	12309661	\N	\N	\N	\N	serine-type endopeptidase inhibitor activity	GO:0004867	#N/A	#N/A	Solyc11g020960.1	0	0	0		0.00343012	0.43701	-2.28827	ARF2sm-42R down vs wt-42G	0	0	0
Solyc11g044260.1		ARF2sm-42R vs wt-42G diff			ARF2sm-42R down vs wt-42G		ARF2sm-42R down vs wt-42G	Glutathione-regulated potassium-efflux system protein (AHRD V1 *-*- Q73FS4_WOLPM)%3B co	at4g04850.2	| symbols: kea3 | k+ efflux antiporter 3 | chr4:2453174-2457490 forward length=776	Solyc11g044260.1.1	SL2.40ch11	35201175	35222560	TG47	70.203	35800859	TES1850	57.291	35149257	\N	\N	integral to membrane	GO:0016021	serine-type endopeptidase inhibitor activity	GO:0004867	#N/A	#N/A	Solyc11g044260.1	0	0	0		0.000496639	0.466609	-2.14312	ARF2sm-42R down vs wt-42G	0	0	0
Solyc11g045000.1		ARF2sm-42R vs wt-42G diff			ARF2sm-42R down vs wt-42G		ARF2sm-42R down vs wt-42G	Kinase family protein (AHRD V1 ***- D7LWD0_ARALY)%3B contains Interpro domain(s) IPR00	at3g59410.2	| symbols: gcn2 | protein kinase family protein | chr3:21950575-21959151 forward length	Solyc11g045000.1.1	SL2.40ch11	36512440	36515151	TGS0414	66.748	36731879	tma0035	66.972	36172541	\N	\N	\N	\N	\N	\N	NA	Probable serine/threonine-protein kinase GCN2	Solyc11g045000.1	0	0	0		0.000226791	0.481207	-2.07811	ARF2sm-42R down vs wt-42G	0	0	0
Solyc11g045030.1		ARF2sm-42R vs wt-42G diff			ARF2sm-42R down vs wt-42G		ARF2sm-42R down vs wt-42G	Cytoplasmic membrane protein (AHRD V1 *-*- B6TYL5_MAIZE)	at1g33490.1	| symbols: | unknown protein contains interpro domain/s: protein of unknown function d	Solyc11g045030.1.1	SL2.40ch11	36544957	36552164	TGS0414	66.748	36731879	tma0035	66.972	36172541	\N	\N	\N	\N	\N	\N	#N/A	#N/A	Solyc11g045030.1	0	0	0		0.00657583	0.468087	-2.13635	ARF2sm-42R down vs wt-42G	0	0	0
Solyc11g062260.1		ARF2sm-42R vs wt-42G diff			ARF2sm-42R down vs wt-42G		ARF2sm-42R down vs wt-42G	Ring-h2 finger protein (AHRD V1 *-*- C1ECT6_9CHLO)%3B contains Interpro domain(s) IPR0	at3g63530.2	| symbols: bb bb2 | ring/u-box superfamily protein | chr3:23456407-23457787 reverse le	Solyc11g062260.1.1	SL2.40ch11	46239133	46244631	TGS2425	66.657	46515526	TGS0104	66.773	44777260	\N	\N	\N	\N	ubiquitin-protein ligase activity	GO:0004842	NA	ubiquitin-protein ligase	Solyc11g062260.1	0	0	0		0.00352681	0.444773	-2.24834	ARF2sm-42R down vs wt-42G	0	0	0
Solyc11g065610.1		ARF2sm-42R vs wt-42G diff			ARF2sm-42R down vs wt-42G		ARF2sm-42R down vs wt-42G	Unknown Protein (AHRD V1)	at1g05780.1	| symbols: | vacuolar atpase assembly integral membrane protein vma21-like domain | chr	Solyc11g065610.1.1	SL2.40ch11	48212781	48215844	TES0095	74.032	48236380	TES1449	73.379	47898425	\N	\N	\N	\N	\N	\N	#N/A	#N/A	Solyc11g065610.1	0	0	0		5.65568e-05	0.493839	-2.02495	ARF2sm-42R down vs wt-42G	0	0	0
Solyc11g066470.1		ARF2sm-42R vs wt-42G diff			ARF2sm-42R down vs wt-42G		ARF2sm-42R down vs wt-42G	Unknown Protein (AHRD V1)													\N	\N	\N	\N	\N	\N	#N/A	#N/A	Solyc11g066470.1	0	0	0		0.002052	0.451416	-2.21525	ARF2sm-42R down vs wt-42G	0	0	0
Solyc11g069640.1		ARF2sm-42R vs wt-42G diff			ARF2sm-42R down vs wt-42G		ARF2sm-42R down vs wt-42G	Carbonic anhydrase family protein (AHRD V1 ***- D7KHY6_ARALY)%3B contains Interpro doma	at1g08080.1	| symbols: ataca7 aca7 | alpha carbonic anhydrase 7 | chr1:2517022-2518546 reverse len	Solyc11g069640.1.1	SL2.40ch11	51355366	51357989	TEI0795	100.869	51392453	TEI0069	94.553	50836209	one-carbon metabolic process	GO:0006730	\N	\N	\N	\N	ascorbate glutathione cycle	carbonic anhydrase, putative	Solyc11g069640.1	0	0	0		0.00794305	0.474069	-2.1094	ARF2sm-42R down vs wt-42G	0	0	0
Solyc11g072690.1		ARF2sm-42R vs wt-42G diff			ARF2sm-42R down vs wt-42G		ARF2sm-42R down vs wt-42G	2-dehydro-3-deoxyphosphooctonate aldolase (AHRD V1 ***- B4F7V1_MAIZE)%3B contains Inter	at1g79500.4	| symbols: atkdsa1 | aldolase-type tim barrel family protein | chr1:29903604-29905989 f	Solyc11g072690.1.1	SL2.40ch11	52977765	52982804	TGS0346	119.986	53085991	TES1695	117.017	52452954	metabolic process biosynthetic process	GO:0008152 GO:0009058	cytoplasm	GO:0005737	\N	\N	CMP-KDO biosynthesis II (from D-arabinose 5-phosphate)	3-desoxy-D-manno octulosonic acid-8-phosphate synthase	Solyc11g072690.1	0	0	0		0.00303138	0.495442	-2.0184	ARF2sm-42R down vs wt-42G	0	0	0
Solyc11g073050.1		ARF2sm-42R vs wt-42G diff			ARF2sm-42R down vs wt-42G		ARF2sm-42R down vs wt-42G	Ras-related protein Rab-8A (AHRD V1 ***- C1C362_9MAXI)%3B contains Interpro domain(s)	at3g46060.3	| symbols: ara3 | rab gtpase homolog 8a | chr3:16917908-16919740 forward length=216 | s	Solyc11g073050.1.1	SL2.40ch11	53248484	53252238	\NA	\NA	\NA	TGS0346	119.986	53085991	small GTPase mediated signal transduction protein transport signal transduction	GO:0007264 GO:0015031 GO:0007165	intracellular	GO:0005622	GTP binding	GO:0005525	#N/A	#N/A	Solyc11g073050.1	0	0	0		0.00300029	0.493864	-2.02485	ARF2sm-42R down vs wt-42G	0	0	0
Solyc12g005240.1		ARF2sm-42R vs wt-42G diff			ARF2sm-42R down vs wt-42G		ARF2sm-42R down vs wt-42G	Unknown Protein (AHRD V1)%3B contains Interpro domain(s) IPR018962 Domain of unknown	at3g20680.1	| symbols: | domain of unknown function (duf1995) | chr3:7230147-7231163 reverse length	Solyc12g005240.1.1	SL2.40ch12	155128	156093	TES1635	7.679	209686	\NA	\NA	\NA	\N	\N	\N	\N	\N	\N	#N/A	#N/A	Solyc12g005240.1	0	0	0		0.00319337	0.289622	-3.45277	ARF2sm-42R down vs wt-42G	0	0	0
Solyc12g005350.1		ARF2sm-42R vs wt-42G diff			ARF2sm-42R down vs wt-42G		ARF2sm-42R down vs wt-42G	Dihydroflavonol-4-reductase (AHRD V1 ***- B6TUD3_MAIZE)%3B contains Interpro domain(s)	at4g27250.1	| symbols: | nad(p)-binding rossmann-fold superfamily protein | chr4:13642803-13644425	Solyc12g005350.1.1	SL2.40ch12	216225	218423	TEI0315	12.387	492117	TES1635	7.679	209686	cellular metabolic process metabolic process	GO:0044237 GO:0008152	\N	\N	\N	\N	leucodelphinidin biosynthesis	cinnamyl-alcohol dehydrogenase	Solyc12g005350.1	0	0	0		0.0040223	0.483162	-2.0697	ARF2sm-42R down vs wt-42G	0	0	0
Solyc12g005930.1		ARF2sm-42R vs wt-42G diff			ARF2sm-42R down vs wt-42G		ARF2sm-42R down vs wt-42G	TBC1 domain family member 2 (AHRD V1 ***- Q5TBQ7_HUMAN)%3B contains Interpro domain(s)	at3g07890.2	| symbols: | ypt/rab-gap domain of gyp1p superfamily protein | chr3:2516639-2518784 rev	Solyc12g005930.1.1	SL2.40ch12	554207	559357	TES0618	15.067	786456	TEI0315	12.387	492117	\N	\N	intracellular	GO:0005622	\N	\N	#N/A	#N/A	Solyc12g005930.1	0	0	0		0.000298781	0.329725	-3.03283	ARF2sm-42R down vs wt-42G	0	0	0
Solyc12g006140.1		ARF2sm-42R vs wt-42G diff			ARF2sm-42R down vs wt-42G		ARF2sm-42R down vs wt-42G	Chlorophyll a-b binding protein 37%2C chloroplastic (AHRD V1 ***- CB26_PETSP)%3B contai	at2g05100.1	| symbols: lhcb2.1 lhcb2 | photosystem ii light harvesting complex gene 2.1 | chr2:182	Solyc12g006140.1.1	SL2.40ch12	693217	694582	TES0618	15.067	786456	cLPT-6-E9	12.168	559305	\N	\N	membrane	GO:0016020	\N	\N	#N/A	#N/A	Solyc12g006140.1	0	0	0		0.00675554	0.490974	-2.03677	ARF2sm-42R down vs wt-42G	0	0	0
Solyc12g007010.1		ARF2sm-42R vs wt-42G diff			ARF2sm-42R down vs wt-42G		ARF2sm-42R down vs wt-42G	Cytosolic Fe-S cluster assembly factor NUBP2 homolog (AHRD V1 *--- NUBP2_NEMVE)%3B cont	at3g24430.1	| symbols: hcf101 | atp binding | chr3:8868731-8872154 reverse length=532	Solyc12g007010.1.1	SL2.40ch12	1447019	1453220	TES0027	21.438	1499087	TES1919	18.245	1413715	\N	\N	\N	\N	ATP binding	GO:0005524	#N/A	#N/A	Solyc12g007010.1	0	0	0		0.0022176	0.401451	-2.49097	ARF2sm-42R down vs wt-42G	0	0	0
Solyc12g008410.1		ARF2sm-42R vs wt-42G diff			ARF2sm-42R down vs wt-42G		ARF2sm-42R down vs wt-42G	RNA-dependent RNA polymerase family protein (AHRD V1 ***- D7L6F2_ARALY)%3B contains Int	at2g19910.1	| symbols: | rna-dependent rna polymerase family protein | chr2:8595820-8600757 reverse	Solyc12g008410.1.1	SL2.40ch12	1846727	1856324	TEI0474	33.909	2185634	TES1889	30.509	1810950	\N	\N	\N	\N	\N	\N	NA	RNA-dependent RNA polymerase family protein	Solyc12g008410.1	0	0	0		0.00224918	0.474258	-2.10856	ARF2sm-42R down vs wt-42G	0	0	0
Solyc12g009920.1		ARF2sm-42R vs wt-42G diff			ARF2sm-42R down vs wt-42G		ARF2sm-42R down vs wt-42G	Glucosyltransferase (AHRD V1 ***- A7M6I0_DIACA)%3B contains Interpro domain(s) IPR0022	at2g29730.1	| symbols: ugt71d1 | udp-glucosyl transferase 71d1 | chr2:12703652-12705055 forward len	Solyc12g009920.1.1	SL2.40ch12	3091797	3092423	TEI0111	41.225	3147453	CT211	39.512	2922428	metabolic process	GO:0008152	\N	\N	\N	\N	cytokinins-<i>O</i>-glucoside biosynthesis	UDP-glycosyltransferase	Solyc12g009920.1	0	0	0		0.00888138	0.314467	-3.17999	ARF2sm-42R down vs wt-42G	0	0	0
Solyc12g010230.1		ARF2sm-42R vs wt-42G diff			ARF2sm-42R down vs wt-42G		ARF2sm-42R down vs wt-42G	Os06g0183700 protein (Fragment) (AHRD V1 *-*- Q0DE22_ORYSJ) Os06g0183700 protein (Fragm	at4g30993.2	| symbols: | calcineurin-like metallo-phosphoesterase superfamily protein | chr4:150982	Solyc12g010230.1.1	SL2.40ch12	3342181	3346441	T1263	44.573	3440355	TES0538	42.386	3153921	\N	\N	\N	\N	\N	\N	#N/A	#N/A	Solyc12g010230.1	0	0	0		0.00242202	0.49899	-2.00405	ARF2sm-42R down vs wt-42G	0	0	0
Solyc12g010730.1		ARF2sm-42R vs wt-42G diff			ARF2sm-42R down vs wt-42G		ARF2sm-42R down vs wt-42G	Os08g0100600 protein (Fragment) (AHRD V1 *-*- Q0J8P7_ORYSJ)%3B contains Interpro domain	at4g03420.1	| symbols: | protein of unknown function (duf789) | chr4:1512226-1513594 forward length	Solyc12g010730.1.1	SL2.40ch12	3645491	3647850	TES0316	46.034	3712340	TES0716	43.553	3563875	\N	\N	\N	\N	\N	\N	#N/A	#N/A	Solyc12g010730.1	0	0	0		0.000179322	0.351959	-2.84124	ARF2sm-42R down vs wt-42G	0	0	0
Solyc12g013890.1		ARF2sm-42R vs wt-42G diff			ARF2sm-42R down vs wt-42G		ARF2sm-42R down vs wt-42G	Genomic DNA chromosome 5 TAC clone K19P17 (AHRD V1 ***- Q9FN40_ARATH)	at5g53860.2	| symbols: emb2737 | embryo defective 2737 | chr5:21865353-21868576 forward length=422	Solyc12g013890.1.1	SL2.40ch12	4682111	4693552	TGS0456	48.57	4766542	TG360	50.67	4678264	\N	\N	\N	\N	\N	\N	#N/A	#N/A	Solyc12g013890.1	0	0	0		0.000348429	0.468375	-2.13504	ARF2sm-42R down vs wt-42G	0	0	0
Solyc12g014570.1		ARF2sm-42R vs wt-42G diff			ARF2sm-42R down vs wt-42G		ARF2sm-42R down vs wt-42G	Glycerophosphoryl diester phosphodiesterase family protein (AHRD V1 ***- D7MKI0_ARALY)%	at5g55480.1	| symbols: svl1 | shv3-like 1 | chr5:22474277-22477819 forward length=766 | symbols: sv	Solyc12g014570.1.1	SL2.40ch12	5569788	5576277	TES0500	55.649	5655246	TGS1162	56.672	5524093	glycerol metabolic process lipid metabolic process	GO:0006071 GO:0006629	\N	\N	\N	\N	glycerol degradation I	SHV3-like 1	Solyc12g014570.1	0	0	0		0.00687077	0.479425	-2.08583	ARF2sm-42R down vs wt-42G	0	0	0
Solyc12g015630.1		ARF2sm-42R vs wt-42G diff			ARF2sm-42R down vs wt-42G		ARF2sm-42R down vs wt-42G	Genomic DNA chromosome 5 P1 clone MDF20 (AHRD V1 ***- Q9FM81_ARATH)	at5g55570.1	| symbols: | unknown protein located in: chloroplast has 35333 blast hits to 34131 pr	Solyc12g015630.1.1	SL2.40ch12	5639981	5641409	TES0500	55.649	5655246	TGS1162	56.672	5524093	\N	\N	\N	\N	\N	\N	#N/A	#N/A	Solyc12g015630.1	0	0	0		0.00192692	0.366369	-2.72949	ARF2sm-42R down vs wt-42G	0	0	0
Solyc12g016220.1		ARF2sm-42R vs wt-42G diff			ARF2sm-42R down vs wt-42G		ARF2sm-42R down vs wt-42G	Cc-nbs-lrr%2C resistance protein Cc-nbs-lrr%2C resistance protein Cc-nbs-lrr%2C resista	at4g27190.1	| symbols: | nb-arc domain-containing disease resistance protein | chr4:13620977-136239	Solyc12g016220.1.1	SL2.40ch12	6401184	6406098	TEI0815	58.407	6426508	TES0471	55.7	6355172	\N	\N	\N	\N	protein binding nucleotide binding	GO:0005515 GO:0000166	#N/A	#N/A	Solyc12g016220.1	0	0	0		0.00337078	0.408898	-2.4456	ARF2sm-42R down vs wt-42G	0	0	0
Solyc12g027590.1		ARF2sm-42R vs wt-42G diff			ARF2sm-42R down vs wt-42G		ARF2sm-42R down vs wt-42G	Exportin 4 (AHRD V1 ***- B0S8I3_DANRE) Exportin 4 (AHRD V1 ***- B0S8I3_DANRE)	at3g04490.1	| symbols: | unknown protein best arabidopsis thaliana protein match is: unknown prote	Solyc12g027590.1.1	SL2.40ch12	18031699	18043710	TGS1966	60.487	19429836	tmb0050	60.452	16714898	\N	\N	\N	\N	\N	\N	#N/A	#N/A	Solyc12g027590.1	0	0	0		0.00494087	0.345843	-2.89148	ARF2sm-42R down vs wt-42G	0	0	0
Solyc12g027600.1		ARF2sm-42R vs wt-42G diff			ARF2sm-42R down vs wt-42G		ARF2sm-42R down vs wt-42G	Nuclear transport receptor exportin 4 (Importin beta superfamily) (ISS) (Fragment) (AHR	at3g04490.1	| symbols: | unknown protein best arabidopsis thaliana protein match is: unknown prote	Solyc12g027600.1.1	SL2.40ch12	18056736	18058431	TGS1966	60.487	19429836	tmb0050	60.452	16714898	\N	\N	\N	\N	\N	\N	#N/A	#N/A	Solyc12g027600.1	0	0	0		0.00412784	0.316524	-3.15932	ARF2sm-42R down vs wt-42G	0	0	0
Solyc12g039120.1		ARF2sm-42R vs wt-42G diff			ARF2sm-42R down vs wt-42G		ARF2sm-42R down vs wt-42G	40S ribosomal protein S19-like (AHRD V1 ***- Q2VCJ6_SOLTU)%3B contains Interpro domain(	at5g61170.1	| symbols: | ribosomal protein s19e family protein | chr5:24611158-24612202 forward len	Solyc12g039120.1.1	SL2.40ch12	37883272	37884761	tmb0012	60.027	39550843	TGS2058	61.27	37725342	\N	\N	ribosome	GO:0005840	\N	\N	#N/A	#N/A	Solyc12g039120.1	0	0	0		0.000647933	0.435375	-2.29687	ARF2sm-42R down vs wt-42G	0	0	0
Solyc12g041880.1		ARF2sm-42R vs wt-42G diff			ARF2sm-42R down vs wt-42G		ARF2sm-42R down vs wt-42G	Homology to unknown gene (AHRD V1 **-- Q00SZ3_OSTTA)	at1g28100.2	| symbols: | unknown protein has 64 blast hits to 64 proteins in 27 species: archae -	Solyc12g041880.1.1	SL2.40ch12	40939472	40942882	TGS3362	62.048	41425024	tmb0076	61.473	40329004	\N	\N	\N	\N	\N	\N	#N/A	#N/A	Solyc12g041880.1	0	0	0		0.000128382	0.389195	-2.5694	ARF2sm-42R down vs wt-42G	0	0	0
Solyc12g055720.1		ARF2sm-42R vs wt-42G diff			ARF2sm-42R down vs wt-42G		ARF2sm-42R down vs wt-42G	Receptor like kinase%2C RLK Receptor like kinase%2C RLK	at1g53730.1	| symbols: srf6 | strubbelig-receptor family 6 | chr1:20061771-20065475 forward length=	Solyc12g055720.1.1	SL2.40ch12	47042875	47052360	TG111	58.579	47133524	TGS3485	58.793	46975359	protein phosphorylation	GO:0006468	\N	\N	protein binding	GO:0005515	#N/A	#N/A	Solyc12g055720.1	0	0	0		0.0016045	0.487529	-2.05116	ARF2sm-42R down vs wt-42G	0	0	0
Solyc12g055810.1		ARF2sm-42R vs wt-42G diff			ARF2sm-42R down vs wt-42G		ARF2sm-42R down vs wt-42G	AAA-ATPase (AHRD V1 **-- C3TX92_BRASY)%3B contains Interpro domain(s) IPR003959 ATPas	at5g57480.1	| symbols: | p-loop containing nucleoside triphosphate hydrolases superfamily protein |	Solyc12g055810.1.1	SL2.40ch12	47162272	47164724	TES1980	65.367	47200002	T1499	63.753	47136871	\N	\N	\N	\N	nucleoside-triphosphatase activity ATP binding	GO:0017111 GO:0005524	NA	nucleoside-triphosphatase	Solyc12g055810.1	0	0	0		0.00910534	0.421094	-2.37477	ARF2sm-42R down vs wt-42G	0	0	0
Solyc12g056250.1		ARF2sm-42R vs wt-42G diff			ARF2sm-42R down vs wt-42G		ARF2sm-42R down vs wt-42G	Glutathione S-transferase (AHRD V1 ***- Q9M558_EUPES)%3B contains Interpro domain(s) I	at5g41210.1	| symbols: atgstt1 gst10 gstt1 | glutathione s-transferase theta 1 | chr5:16492550-16	Solyc12g056250.1.1	SL2.40ch12	47565850	47567987	P68	68.062	47765315	TG367	66.188	47451778	\N	\N	\N	\N	\N	\N	glutathione-mediated detoxification	Glutathione S-transferase	Solyc12g056250.1	0	0	0		0.00492775	0.395431	-2.52889	ARF2sm-42R down vs wt-42G	0	0	0
Solyc12g056300.1		ARF2sm-42R vs wt-42G diff			ARF2sm-42R down vs wt-42G		ARF2sm-42R down vs wt-42G	Receptor like kinase%2C RLK	at1g63430.1	| symbols: | leucine-rich repeat protein kinase family protein | chr1:23522896-23526451	Solyc12g056300.1.1	SL2.40ch12	47599490	47604967	P68	68.062	47765315	TG367	66.188	47451778	\N	\N	\N	\N	transmembrane receptor protein serine/threonine kinase activity	GO:0004675	NA	Receptor like kinase%2C RLK	Solyc12g056300.1	0	0	0		0.0035399	0.489567	-2.04262	ARF2sm-42R down vs wt-42G	0	0	0
Solyc12g056830.1		ARF2sm-42R vs wt-42G diff			ARF2sm-42R down vs wt-42G		ARF2sm-42R down vs wt-42G	ATP synthase delta subunit (AHRD V1 ***- Q7XYM8_BIGNA)%3B contains Interpro domain(s)	at4g09650.1	| symbols: atpd | atp synthase delta-subunit gene | chr4:6100799-6101503 forward length	Solyc12g056830.1.1	SL2.40ch12	48264644	48265396	TES0743	73.03	48397335	T1266	57.237	47991076	\N	\N	proton-transporting ATP synthase complex, catalytic core F(1)	GO:0045261	\N	\N	NA	ATP synthase delta subunit	Solyc12g056830.1	0	0	0		0.00588275	0.430406	-2.32339	ARF2sm-42R down vs wt-42G	0	0	0
Solyc12g062620.1		ARF2sm-42R vs wt-42G diff			ARF2sm-42R down vs wt-42G		ARF2sm-42R down vs wt-42G	ATP synthase subunit c chloroplastic (AHRD V1 ***- D3J8G8_9FABA)%3B contains Interpro d													\N	\N	proton-transporting two-sector ATPase complex, proton-transporting domain proton-transp	GO:0033177 GO:0045263	\N	\N	NA	ATP synthase subunit c chloroplastic	Solyc12g062620.1	0	0	0		0.000466646	0.485806	-2.05844	ARF2sm-42R down vs wt-42G	0	0	0
Solyc12g076340.1		ARF2sm-42R vs wt-42G diff			ARF2sm-42R down vs wt-42G		ARF2sm-42R down vs wt-42G	Thyroid receptor-interacting protein 13 (AHRD V1 **-- B6U6B8_MAIZE)%3B contains Interpr	at4g24710.1	| symbols: | p-loop containing nucleoside triphosphate hydrolases superfamily protein |	Solyc12g076340.1.1	SL2.40ch12	55898926	55900805	tma0270	61.132	56896942	TGS0362	64.052	55012893	\N	\N	\N	\N	ATP binding	GO:0005524	#N/A	#N/A	Solyc12g076340.1	0	0	0		0.00818108	0.494528	-2.02213	ARF2sm-42R down vs wt-42G	0	0	0
Solyc12g087890.1		ARF2sm-42R vs wt-42G diff			ARF2sm-42R down vs wt-42G		ARF2sm-42R down vs wt-42G	Transcription factor/ transcription regulator (AHRD V1 **** D7M240_ARALY)	at5g09460.1	| symbols: | sequence-specific dna binding transcription factors transcription regulato	Solyc12g087890.1.1	SL2.40ch12	61833684	61834752	tme0089	80.508	62021177	P64	74.464	61776743	\N	\N	\N	\N	sequence-specific DNA binding transcription factor activity	GO:0003700	#N/A	#N/A	Solyc12g087890.1	0	0	0		0.00798541	0.459544	-2.17607	ARF2sm-42R down vs wt-42G	0	0	0
Solyc12g089290.1		ARF2sm-42R vs wt-42G diff			ARF2sm-42R down vs wt-42G		ARF2sm-42R down vs wt-42G	Receptor expression-enhancing protein 3 (AHRD V1 *--- B6TB01_MAIZE)%3B contains Interpr	at5g42560.1	| symbols: | abscisic acid-responsive (tb2/dp1 hva22) family protein | chr5:17015573-1	Solyc12g089290.1.1	SL2.40ch12	62852577	62854975	TES0717	88.604	62957876	C2_At4g16580	81.122	62657471	\N	\N	\N	\N	\N	\N	#N/A	#N/A	Solyc12g089290.1	0	0	0		0.00643029	0.424247	-2.35712	ARF2sm-42R down vs wt-42G	0	0	0
Solyc12g096030.1		ARF2sm-42R vs wt-42G diff			ARF2sm-42R down vs wt-42G		ARF2sm-42R down vs wt-42G	Mitochondrial carrier-like protein (AHRD V1 ***- Q8L9F8_ARATH)%3B contains Interpro dom	at1g72820.1	| symbols: | mitochondrial substrate carrier family protein | chr1:27403457-27404506 fo	Solyc12g096030.1.1	SL2.40ch12	63449427	63450461	TES0839	90.48	63499434	TEI0119	94.231	63420344	\N	\N	membrane mitochondrial inner membrane	GO:0016020 GO:0005743	\N	\N	#N/A	#N/A	Solyc12g096030.1	0	0	0		0.00563956	0.382912	-2.61157	ARF2sm-42R down vs wt-42G	0	0	0
Solyc12g099200.1		ARF2sm-42R vs wt-42G diff			ARF2sm-42R down vs wt-42G		ARF2sm-42R down vs wt-42G	Invertase inhibitor (AHRD V1 **** O49908_TOBAC)%3B contains Interpro domain(s) IPR0065	at1g47960.1	| symbols: c/vif1 atc/vif1 | cell wall / vacuolar inhibitor of fructosidase 1 | chr1:1	Solyc12g099200.1.1	SL2.40ch12	64775547	64776957	cTOA-22-C23	114.281	64802182	TES0620	108.966	64648530	\N	\N	\N	\N	pectinesterase inhibitor activity	GO:0046910	#N/A	#N/A	Solyc12g099200.1	0	0	0		0.00679448	0.47573	-2.10203	ARF2sm-42R down vs wt-42G	0	0	0
Solyc12g099650.1		ARF2sm-42R vs wt-42G diff			ARF2sm-42R down vs wt-42G		ARF2sm-42R down vs wt-42G	Photosystem II 5 kDa protein%2C chloroplastic (AHRD V1 ***- PST2_GOSHI)	at3g21055.1	| symbols: psbtn | photosystem ii subunit t | chr3:7376761-7377072 reverse length=103	Solyc12g099650.1.1	SL2.40ch12	65050922	65051263	TGS0591	118.396	65390334	TES1724	116.7	64942078	\N	\N	\N	\N	\N	\N	photosynthesis light reactions	Photosystem II 5 kDa protein%2C chloroplastic	Solyc12g099650.1	0	0	0		0.00452923	0.13292	-7.52331	ARF2sm-42R down vs wt-42G	0	0	0
Solyc12g099930.1		ARF2sm-42R vs wt-42G diff			ARF2sm-42R down vs wt-42G		ARF2sm-42R down vs wt-42G	Serine-glyoxylate aminotransferase (AHRD V1 ***- Q3S2I1_SPIPO)%3B contains Interpro dom	at2g13360.2	| symbols: agt agt1 sgat | alanine:glyoxylate aminotransferase | chr2:5539417-5540902	Solyc12g099930.1.1	SL2.40ch12	65224451	65227305	TGS0591	118.396	65390334	TES1724	116.7	64942078	metabolic process	GO:0008152	\N	\N	pyridoxal phosphate binding	GO:0030170	glycine biosynthesis III	glyoxylate aminotransferase	Solyc12g099930.1	0	0	0		0.00681232	0.121122	-8.25613	ARF2sm-42R down vs wt-42G	0	0	0
Solyc00g020030.1		ARF2sm-42R vs wt-42G diff			ARF2sm-42R up vs wt-42G		ARF2sm-42R up vs wt-42G	Unknown Protein (AHRD V1)													\N	\N	\N	\N	\N	\N	#N/A	#N/A	Solyc00g020030.1	0	0	0		0.00353095	2.4059	2.4059	ARF2sm-42R up vs wt-42G	0	0	0
Solyc01g005370.2		ARF2sm-42R vs wt-42G diff			ARF2sm-42R up vs wt-42G		ARF2sm-42R up vs wt-42G	Calmodulin-2 (AHRD V1 ***- D7LFI7_ARALY)%3B contains Interpro domain(s) IPR011992 EF-	at1g24620.1	| symbols: | ef hand calcium-binding protein family | chr1:8723893-8724453 reverse leng	Solyc01g005370.2.1	SL2.40ch01	259638	260564	CT233	1.705	303123	tma0313	2.934	257609	\N	\N	\N	\N	calcium ion binding	GO:0005509	#N/A	#N/A	Solyc01g005370.2	0	0	0		0.000548312	2.68284	2.68284	ARF2sm-42R up vs wt-42G	0	0	0
Solyc01g006340.2		ARF2sm-42R vs wt-42G diff			ARF2sm-42R up vs wt-42G		ARF2sm-42R up vs wt-42G	ATP dependent RNA helicase (AHRD V1 ***- B3LKV6_YEAS1)%3B contains Interpro domain(s)													\N	\N	\N	\N	ATP-dependent helicase activity ATP binding	GO:0008026 GO:0005524	#N/A	#N/A	Solyc01g006340.2	0	0	0		0.000495556	2.20131	2.20131	ARF2sm-42R up vs wt-42G	0	0	0
Solyc01g007190.2		ARF2sm-42R vs wt-42G diff			ARF2sm-42R up vs wt-42G		ARF2sm-42R up vs wt-42G	Unknown Protein (AHRD V1)	none	none	Solyc01g007190.2.1	SL2.40ch01	1770445	1771528	TES0915	23.389	1779810	TES1738	22.973	1606106	\N	\N	\N	\N	\N	\N	#N/A	#N/A	Solyc01g007190.2	0	0	0		0.00136729	2.7826	2.7826	ARF2sm-42R up vs wt-42G	0	0	0
Solyc01g008730.2		ARF2sm-42R vs wt-42G diff			ARF2sm-42R up vs wt-42G		ARF2sm-42R up vs wt-42G	BZIP transcription factor (AHRD V1 **** Q9SQK1_TOBAC)%3B contains Interpro domain(s) I	at5g06950.4	| symbols: ahbp-1b tga2 | bzip transcription factor family protein | chr5:2152323-2154	Solyc01g008730.2.1	SL2.40ch01	2765227	2774729	cLEC-4-E12	23.592	3174417	T1650	23.612	2657288	\N	\N	\N	\N	sequence-specific DNA binding transcription factor activity	GO:0003700	#N/A	#N/A	Solyc01g008730.2	0	0	0		0.00357602	2.05164	2.05164	ARF2sm-42R up vs wt-42G	0	0	0
Solyc01g010490.2		ARF2sm-42R vs wt-42G diff			ARF2sm-42R up vs wt-42G		ARF2sm-42R up vs wt-42G	Cytochrome P450	at4g31500.1	| symbols: cyp83b1 sur2 rnt1 red1 atr4 | cytochrome p450 family 83 subfamily b p	Solyc01g010490.2.1	SL2.40ch01	5373579	5375529	TES0020	29.966	5646654	TES0976	26.876	4984270	\N	\N	\N	\N	oxygen binding	GO:0019825	NA	CYP83B1 monooxygenase	Solyc01g010490.2	0	0	0		0.00569394	3.64287	3.64287	ARF2sm-42R up vs wt-42G	0	0	0
Solyc01g010830.2		ARF2sm-42R vs wt-42G diff			ARF2sm-42R up vs wt-42G		ARF2sm-42R up vs wt-42G	HAD-superfamily hydrolase (AHRD V1 ***- D5A3P4_SPIPL)%3B contains Interpro domain(s) I	at1g14310.1	| symbols: | haloacid dehalogenase-like hydrolase (had) superfamily protein | chr1:4885	Solyc01g010830.2.1	SL2.40ch01	6230907	6239250	TGS0972	34.801	9008291	TGS3437	35.84	5898268	\N	\N	\N	\N	protein binding	GO:0005515	#N/A	#N/A	Solyc01g010830.2	0	0	0		0.000268719	2.19982	2.19982	ARF2sm-42R up vs wt-42G	0	0	0
Solyc01g010950.2		ARF2sm-42R vs wt-42G diff			ARF2sm-42R up vs wt-42G		ARF2sm-42R up vs wt-42G	Kinase family protein (AHRD V1 **** D7KBF8_ARALY)%3B contains Interpro domain(s) IPR01	at1g14000.1	| symbols: vik | vh1-interacting kinase | chr1:4797606-4800043 forward length=438	Solyc01g010950.2.1	SL2.40ch01	6505612	6517771	TGS0972	34.801	9008291	TGS3437	35.84	5898268	\N	\N	\N	\N	MAP kinase kinase activity	GO:0004708	NA	VH1-interacting kinase	Solyc01g010950.2	0	0	0		0.00259483	2.01539	2.01539	ARF2sm-42R up vs wt-42G	0	0	0
Solyc01g016410.2		ARF2sm-42R vs wt-42G diff			ARF2sm-42R up vs wt-42G		ARF2sm-42R up vs wt-42G	RING finger protein 43 (AHRD V1 *-*- RNF43_HUMAN)%3B contains Interpro domain(s) IPR01	at5g59550.1	| symbols: | zinc finger (c3hc4-type ring finger) family protein | chr5:23998422-239996	Solyc01g016410.2.1	SL2.40ch01	19490537	19491509	TGS1686	35.144	21329779	TGS0349	32.35	17696773	\N	\N	\N	\N	zinc ion binding	GO:0008270	#N/A	#N/A	Solyc01g016410.2	0	0	0		0.00832843	2.08103	2.08103	ARF2sm-42R up vs wt-42G	0	0	0
Solyc01g021730.2		ARF2sm-42R vs wt-42G diff			ARF2sm-42R up vs wt-42G		ARF2sm-42R up vs wt-42G	NAC domain protein IPR003441 (AHRD V1 *-*- B9IHI9_POPTR)%3B contains Interpro domain(s)	at5g04410.1	| symbols: nac2 anac078 | nac domain containing protein 2 | chr5:1243980-1246416 forwa	Solyc01g021730.2.1	SL2.40ch01	32776998	32778063	TES0932	33.978	33509108	TGS2839	34.822	32387518	\N	\N	\N	\N	\N	\N	#N/A	#N/A	Solyc01g021730.2	0	0	0		0.00308247	2.77658	2.77658	ARF2sm-42R up vs wt-42G	0	0	0
Solyc01g057040.2		ARF2sm-42R vs wt-42G diff			ARF2sm-42R up vs wt-42G		ARF2sm-42R up vs wt-42G	PDE320 (AHRD V1 ***- D7L613_ARALY)													\N	\N	\N	\N	\N	\N	#N/A	#N/A	Solyc01g057040.2	0	0	0		0.000315764	2.08006	2.08006	ARF2sm-42R up vs wt-42G	0	0	0
Solyc01g060080.2		ARF2sm-42R vs wt-42G diff			ARF2sm-42R up vs wt-42G		ARF2sm-42R up vs wt-42G	Serine/threonine-protein phosphatase 4 regulatory subunit 3 (AHRD V1 **-- PP4R3_DANRE)%	at3g06670.1	| symbols: | binding | chr3:2105908-2113136 reverse length=865 | symbols: | binding | c	Solyc01g060080.2.1	SL2.40ch01	62357529	62376770	TEI0461	34.831	63870286	TGS0454	35.061	60475068	\N	\N	\N	\N	protein binding	GO:0005515	#N/A	#N/A	Solyc01g060080.2	0	0	0		5.14316e-06	2.11185	2.11185	ARF2sm-42R up vs wt-42G	0	0	0
Solyc01g068080.2		ARF2sm-42R vs wt-42G diff			ARF2sm-42R up vs wt-42G		ARF2sm-42R up vs wt-42G	Dihydroflavonol 4-reductase family (AHRD V1 ***- D7MD06_ARALY)%3B contains Interpro dom	at1g68540.1	| symbols: | nad(p)-binding rossmann-fold superfamily protein | chr1:25720066-25721282	Solyc01g068080.2.1	SL2.40ch01	69511671	69514962	TES0085	44.104	69624839	TGS0981	42.909	69497129	metabolic process cellular metabolic process	GO:0008152 GO:0044237	\N	\N	\N	\N	capsiconiate biosynthesis	cinnamoyl-CoA reductase, putative	Solyc01g068080.2	0	0	0		0.00259983	2.7924	2.7924	ARF2sm-42R up vs wt-42G	0	0	0
Solyc01g073660.2		ARF2sm-42R vs wt-42G diff			ARF2sm-42R up vs wt-42G		ARF2sm-42R up vs wt-42G	Uncharacterized MFS-type transporter C19orf28 (AHRD V1 **-- CS028_HUMAN)%3B contains In	at2g44280.2	| symbols: | major facilitator superfamily protein | chr2:18301563-18303927 reverse len	Solyc01g073660.2.1	SL2.40ch01	70277708	70286071	T1627	49.176	70295805	TGS1999	50.691	70237796	\N	\N	\N	\N	\N	\N	#N/A	#N/A	Solyc01g073660.2	0	0	0		0.00498707	5.66005	5.66005	ARF2sm-42R up vs wt-42G	0	0	0
Solyc01g074020.2		ARF2sm-42R vs wt-42G diff			ARF2sm-42R up vs wt-42G		ARF2sm-42R up vs wt-42G	Box C/D snoRNA (AHRD V1 *--- A6ZSU7_YEAS7)%3B contains Interpro domain(s) IPR007529 Z	at1g04945.1	| symbols: | hit-type zinc finger family protein | chr1:1400969-1402651 forward length=	Solyc01g074020.2.1	SL2.40ch01	70586854	70593110	TES0039	50.519	70961518	T1627	49.176	70295805	\N	\N	\N	\N	\N	\N	#N/A	#N/A	Solyc01g074020.2	0	0	0		0.000112877	2.05436	2.05436	ARF2sm-42R up vs wt-42G	0	0	0
Solyc01g079260.2		ARF2sm-42R vs wt-42G diff			ARF2sm-42R up vs wt-42G		ARF2sm-42R up vs wt-42G	WRKY transcription factor 4 (AHRD V1 ***- A7UGD1_SOLTU)%3B contains Interpro domain(s)	at2g47260.1	| symbols: wrky23 atwrky23 | wrky dna-binding protein 23 | chr2:19405045-19406446 reve	Solyc01g079260.2.1	SL2.40ch01	70866242	70868698	TES0039	50.519	70961518	T1627	49.176	70295805	\N	\N	\N	\N	\N	\N	#N/A	#N/A	Solyc01g079260.2	0	0	0		0.00965359	2.99107	2.99107	ARF2sm-42R up vs wt-42G	0	0	0
Solyc01g079720.2		ARF2sm-42R vs wt-42G diff			ARF2sm-42R up vs wt-42G		ARF2sm-42R up vs wt-42G	Kinase-associated protein phosphatase 1 (AHRD V1 **** A6N8J3_SOLPE)%3B contains Interpr	at5g19280.1	| symbols: kapp rag1 | kinase associated protein phosphatase | chr5:6488450-6493182 fo	Solyc01g079720.2.1	SL2.40ch01	71336146	71351250	TGS1329	50.909	71391093	TES0139	48.238	71295578	\N	\N	\N	\N	phosphoprotein phosphatase activity protein kinase binding	GO:0004721 GO:0019901	NA	kinase associated protein phosphatase	Solyc01g079720.2	0	0	0		6.18029e-05	2.12035	2.12035	ARF2sm-42R up vs wt-42G	0	0	0
Solyc01g079760.2		ARF2sm-42R vs wt-42G diff			ARF2sm-42R up vs wt-42G		ARF2sm-42R up vs wt-42G	Mitochondrial carrier protein (AHRD V1 ***- C5P0Z3_COCP7)%3B contains Interpro domain(s	at5g27520.1	| symbols: pnc2 | peroxisomal adenine nucleotide carrier 2 | chr5:9714664-9716244 rever	Solyc01g079760.2.1	SL2.40ch01	71416626	71424710	T1208	49.085	71658754	TGS1329	50.909	71391093	\N	\N	\N	\N	ADP transmembrane transporter activity ATP transmembrane transporter activity	GO:0015217 GO:0005347	#N/A	#N/A	Solyc01g079760.2	0	0	0		0.000176876	2.02784	2.02784	ARF2sm-42R up vs wt-42G	0	0	0
Solyc01g079770.2		ARF2sm-42R vs wt-42G diff			ARF2sm-42R up vs wt-42G		ARF2sm-42R up vs wt-42G	TLC domain-containing protein 2 (AHRD V1 *-*- TLCD2_DANRE)%3B contains Interpro domain(	at1g21790.1	| symbols: | tram lag1 and cln8 (tlc) lipid-sensing domain containing protein | chr1:7	Solyc01g079770.2.1	SL2.40ch01	71425485	71426806	T1208	49.085	71658754	TGS1329	50.909	71391093	proteolysis	GO:0006508	integral to membrane	GO:0016021	\N	\N	#N/A	#N/A	Solyc01g079770.2	0	0	0		0.000564615	2.54995	2.54995	ARF2sm-42R up vs wt-42G	0	0	0
Solyc01g080890.2		ARF2sm-42R vs wt-42G diff			ARF2sm-42R up vs wt-42G		ARF2sm-42R up vs wt-42G	Unknown Protein (AHRD V1)	at1g32460.1	| symbols: | unknown protein has 19 blast hits to 19 proteins in 8 species: archae - 0	Solyc01g080890.2.1	SL2.40ch01	72726646	72727265	TGS0635	50.176	72895110	CT231	49.176	72705216	\N	\N	\N	\N	\N	\N	#N/A	#N/A	Solyc01g080890.2	0	0	0		0.0053837	2.54706	2.54706	ARF2sm-42R up vs wt-42G	0	0	0
Solyc01g081270.2		ARF2sm-42R vs wt-42G diff			ARF2sm-42R up vs wt-42G		ARF2sm-42R up vs wt-42G	Glutathione S-transferase (AHRD V1 ***- Q8H9E5_CUCMA)%3B contains Interpro domain(s) I	at3g09270.1	| symbols: atgstu8 gstu8 | glutathione s-transferase tau 8 | chr3:2848407-2849226 reve	Solyc01g081270.2.1	SL2.40ch01	73027037	73028378	TES1849	47.788	73559725	TEI0133	50.177	72900264	\N	\N	\N	\N	\N	\N	glutathione-mediated detoxification	Glutathione S-transferase	Solyc01g081270.2	0	0	0		0.000727002	2.17623	2.17623	ARF2sm-42R up vs wt-42G	0	0	0
Solyc01g087720.2		ARF2sm-42R vs wt-42G diff			ARF2sm-42R up vs wt-42G		ARF2sm-42R up vs wt-42G	Structural maintenance of chromosomes family protein (AHRD V1 ***- D7M7H7_ARALY)%3B con	at5g15920.1	| symbols: smc5 | structural maintenance of chromosomes 5 | chr5:5196210-5199559 forwar	Solyc01g087720.2.1	SL2.40ch01	74386246	74416833	TES0175	51.294	74589830	cLET3E17	49.172	74270225	\N	\N	\N	\N	protein heterodimerization activity	GO:0046982	#N/A	#N/A	Solyc01g087720.2	0	0	0		4.55218e-05	2.0564	2.0564	ARF2sm-42R up vs wt-42G	0	0	0
Solyc01g088030.2		ARF2sm-42R vs wt-42G diff			ARF2sm-42R up vs wt-42G		ARF2sm-42R up vs wt-42G	Structure-specific endonuclease subunit slx1 (AHRD V1 *-*- D3PJZ8_9MAXI)%3B contains In	at5g43210.1	| symbols: | excinuclease abc c subunit n-terminal | chr5:17347567-17348379 forward l	Solyc01g088030.2.1	SL2.40ch01	74645626	74648995	TGS1273	50.09	74773151	TES0175	51.294	74589830	\N	\N	intracellular	GO:0005622	\N	\N	#N/A	#N/A	Solyc01g088030.2	0	0	0		0.00121811	3.40206	3.40206	ARF2sm-42R up vs wt-42G	0	0	0
Solyc01g091350.2		ARF2sm-42R vs wt-42G diff			ARF2sm-42R up vs wt-42G		ARF2sm-42R up vs wt-42G	ATP-dependent DNA helicase 2 subunit KU80 (AHRD V1 **-* KU80_ARATH)%3B contains Interpr	at1g48050.1	| symbols: ku80 atku80 | ku80 family protein | chr1:17723498-17726859 forward length=6	Solyc01g091350.2.1	SL2.40ch01	76753032	76759212	TES1192	63.575	76794569	T1162	62.745	76724098	\N	\N	\N	\N	double-stranded telomeric DNA binding	GO:0003691	#N/A	#N/A	Solyc01g091350.2	0	0	0		0.00180604	2.08986	2.08986	ARF2sm-42R up vs wt-42G	0	0	0
Solyc01g094490.2		ARF2sm-42R vs wt-42G diff			ARF2sm-42R up vs wt-42G		ARF2sm-42R up vs wt-42G	NAC transcription factor (AHRD V1 *-*- B3VK71_TOBAC)%3B contains Interpro domain(s) IP	at3g15500.1	| symbols: atnac3 anac055 nac055 nac3 | nac domain containing protein 3 | chr3:52347	Solyc01g094490.2.1	SL2.40ch01	77709645	77710398	TGS0486	71.81	77847218	TGS2362	69.065	77377734	\N	\N	\N	\N	\N	\N	#N/A	#N/A	Solyc01g094490.2	0	0	0		0.000857915	2.21679	2.21679	ARF2sm-42R up vs wt-42G	0	0	0
Solyc01g095920.2		ARF2sm-42R vs wt-42G diff			ARF2sm-42R up vs wt-42G		ARF2sm-42R up vs wt-42G	O-methyltransferase family 3 (AHRD V1 ***- B5ZT51_RHILW)%3B contains Interpro domain(s)	at2g45360.1	| symbols: | protein of unknown function (duf1442) | chr2:18698619-18699360 forward len	Solyc01g095920.2.1	SL2.40ch01	78825307	78827149	TES1414	90.247	79320515	TGS2162	83.85	78788109	\N	\N	\N	\N	O-methyltransferase activity	GO:0008171	#N/A	#N/A	Solyc01g095920.2	0	0	0		0.00191384	4.72773	4.72773	ARF2sm-42R up vs wt-42G	0	0	0
Solyc01g096070.2		ARF2sm-42R vs wt-42G diff			ARF2sm-42R up vs wt-42G		ARF2sm-42R up vs wt-42G	Auxin response factor 9 (AHRD V1 **** D7R605_SOLLC)%3B contains Interpro domain(s) IPR	at4g23980.1	| symbols: arf9 | auxin response factor 9 | chr4:12451592-12454737 forward length=638 |	Solyc01g096070.2.1	SL2.40ch01	78941748	78946012	TES1414	90.247	79320515	TGS2162	83.85	78788109	\N	\N	\N	\N	sequence-specific DNA binding transcription factor activity protein C-terminus binding	GO:0003700 GO:0008022	#N/A	#N/A	Solyc01g096070.2	0	0	0		0.000178442	2.2226	2.2226	ARF2sm-42R up vs wt-42G	0	0	0
Solyc01g096340.2		ARF2sm-42R vs wt-42G diff			ARF2sm-42R up vs wt-42G		ARF2sm-42R up vs wt-42G	Auxin-induced SAUR-like protein (AHRD V1 ***- Q8S351_CAPAN)%3B contains Interpro domain	at2g46690.1	| symbols: | saur-like auxin-responsive protein family | chr2:19180904-19181269 forward	Solyc01g096340.2.1	SL2.40ch01	79175401	79176134	TES1414	90.247	79320515	TGS2162	83.85	78788109	\N	\N	\N	\N	calmodulin binding	GO:0005516	#N/A	#N/A	Solyc01g096340.2	0	0	0		0.00288023	2.65245	2.65245	ARF2sm-42R up vs wt-42G	0	0	0
Solyc01g096740.2		ARF2sm-42R vs wt-42G diff			ARF2sm-42R up vs wt-42G		ARF2sm-42R up vs wt-42G	Transporter major facilitator family (AHRD V1 **-- C4M254_ENTHI)%3B contains Interpro d	at5g13750.1	| symbols: zifl1 | zinc induced facilitator-like 1 | chr5:4438318-4441289 forward lengt	Solyc01g096740.2.1	SL2.40ch01	79513037	79519402	TES0687	90.794	79618494	T852	88.832	79459758	\N	\N	\N	\N	sugar:hydrogen symporter activity	GO:0005351	#N/A	#N/A	Solyc01g096740.2	0	0	0		0.00110703	2.73979	2.73979	ARF2sm-42R up vs wt-42G	0	0	0
Solyc01g097430.2		ARF2sm-42R vs wt-42G diff			ARF2sm-42R up vs wt-42G		ARF2sm-42R up vs wt-42G	ABC transporter G family member 2 (AHRD V1 *-*- AB2G_ARATH)%3B contains Interpro domain	at2g39350.1	| symbols: | abc-2 type transporter family protein | chr2:16430174-16432396 reverse len	Solyc01g097430.2.1	SL2.40ch01	80046125	80049268	TM40	95.3	80067688	TES1752	93.754	79958166	\N	\N	\N	\N	protein homodimerization activity	GO:0042803	NA	ABC transporter G family member 2	Solyc01g097430.2	0	0	0		0.000309119	14.6061	14.6061	ARF2sm-42R up vs wt-42G	0	0	0
Solyc01g098320.2		ARF2sm-42R vs wt-42G diff			ARF2sm-42R up vs wt-42G		ARF2sm-42R up vs wt-42G	DNA-directed RNA polymerase subunit H (AHRD V1 *-*- RPOH_METJA)%3B contains Interpro do	at3g57080.1	| symbols: rpb5b nrpe5 | eukaryotic rpb5 rna polymerase subunit family protein | chr3:	Solyc01g098320.2.1	SL2.40ch01	80640995	80644917	cLPT-5-M7	100.214	80797612	T664	96.916	80278335	\N	\N	\N	\N	protein binding	GO:0005515	NA	DNA-directed RNA polymerase subunit H	Solyc01g098320.2	0	0	0		0.000492622	2.05715	2.05715	ARF2sm-42R up vs wt-42G	0	0	0
Solyc01g099220.2		ARF2sm-42R vs wt-42G diff			ARF2sm-42R up vs wt-42G		ARF2sm-42R up vs wt-42G	DNA polymerase (AHRD V1 *-*- B9RF68_RICCO)%3B contains Interpro domain(s) IPR006172 D	at1g67500.2	| symbols: rev3 | recovery protein 3 | chr1:25287707-25296714 reverse length=1916 | sym	Solyc01g099220.2.1	SL2.40ch01	81275113	81289446	T1488	103.766	81429728	cLPT-5-M7	100.214	80797612	DNA replication nucleobase-containing compound metabolic process	GO:0006260 GO:0006139	\N	\N	nucleic acid binding	GO:0003676	NA	recovery protein 3	Solyc01g099220.2	0	0	0		5.87998e-06	2.18253	2.18253	ARF2sm-42R up vs wt-42G	0	0	0
Solyc01g100130.2		ARF2sm-42R vs wt-42G diff			ARF2sm-42R up vs wt-42G		ARF2sm-42R up vs wt-42G	PHD-finger family protein (AHRD V1 *-*- B6U0S2_MAIZE)%3B contains Interpro domain(s) I	at3g05670.1	| symbols: | ring/u-box protein | chr3:1653888-1657022 forward length=883	Solyc01g100130.2.1	SL2.40ch01	81986149	81990012	TES1886	110.542	82279335	TEI0125	107.717	81714716	\N	\N	\N	\N	zinc ion binding	GO:0008270	#N/A	#N/A	Solyc01g100130.2	0	0	0		0.00633591	2.10074	2.10074	ARF2sm-42R up vs wt-42G	0	0	0
Solyc01g100640.2		ARF2sm-42R vs wt-42G diff			ARF2sm-42R up vs wt-42G		ARF2sm-42R up vs wt-42G	Catalase (AHRD V1 ***- O24511_TOBAC)%3B contains Interpro domain(s) IPR002226 Catalas	at4g35090.2	| symbols: cat2 | catalase 2 | chr4:16701105-16703215 reverse length=474	Solyc01g100640.2.1	SL2.40ch01	82373864	82375340	TES0083	108.945	82476772	TEI0053	110.384	82290077	oxidation-reduction process	GO:0055114	\N	\N	\N	\N	oxidative ethanol degradation III	catalase	Solyc01g100640.2	0	0	0		0.00725768	2.40856	2.40856	ARF2sm-42R up vs wt-42G	0	0	0
Solyc01g102410.2		ARF2sm-42R vs wt-42G diff			ARF2sm-42R up vs wt-42G		ARF2sm-42R up vs wt-42G	Glutaminyl-tRNA synthetase (AHRD V1 ***- A8BEZ0_GIALA)%3B contains Interpro domain(s)	at5g26710.1	| symbols: | glutamyl/glutaminyl-trna synthetase class ic | chr5:9305673-9308247 forwa	Solyc01g102410.2.1	SL2.40ch01	82987257	82996076	TGS1593	115.344	83013364	TGS1156	114.633	82911382	translation	GO:0006412	cytoplasm	GO:0005737	serine-type endopeptidase inhibitor activity	GO:0004867	tRNA charging pathway	glutamate-tRNA ligase	Solyc01g102410.2	0	0	0		0.000885148	2.07338	2.07338	ARF2sm-42R up vs wt-42G	0	0	0
Solyc01g103170.2		ARF2sm-42R vs wt-42G diff			ARF2sm-42R up vs wt-42G		ARF2sm-42R up vs wt-42G	Lysine ketoglutarate reductase trans-splicing related 1-like (AHRD V1 ***- Q5JLN0_ORYSJ	at4g18530.1	| symbols: | protein of unknown function (duf707) | chr4:10217749-10220285 forward leng	Solyc01g103170.2.1	SL2.40ch01	83589714	83597304	TES0859	117.439	83766747	TGS3281	117.593	83456646	proteolysis	GO:0006508	\N	\N	\N	\N	#N/A	#N/A	Solyc01g103170.2	0	0	0		0.00285191	2.3533	2.3533	ARF2sm-42R up vs wt-42G	0	0	0
Solyc01g105240.2		ARF2sm-42R vs wt-42G diff			ARF2sm-42R up vs wt-42G		ARF2sm-42R up vs wt-42G	Ubiquitin carboxyl-terminal hydrolase (AHRD V1 **** B9SZ50_RICCO)%3B contains Interpro	at4g39910.1	| symbols: atubp3 ubp3 | ubiquitin-specific protease 3 | chr4:18511858-18514139 revers	Solyc01g105240.2.1	SL2.40ch01	85237018	85241688	TES1231	125.647	85270637	TES1036	124.172	85086537	\N	\N	\N	\N	ubiquitin-specific protease activity	GO:0004843	NA	ubiquitin-specific protease 3	Solyc01g105240.2	0	0	0		0.000213167	2.07755	2.07755	ARF2sm-42R up vs wt-42G	0	0	0
Solyc01g107170.2		ARF2sm-42R vs wt-42G diff			ARF2sm-42R up vs wt-42G		ARF2sm-42R up vs wt-42G	Zinc finger protein (AHRD V1 ***- A0T3Q5_SOLTU)%3B contains Interpro domain(s) IPR0070	at1g27730.1	| symbols: stz zat10 | salt tolerance zinc finger | chr1:9648302-9648985 reverse lengt	Solyc01g107170.2.1	SL2.40ch01	86548794	86550092	TGS2980	138.235	86588532	TG474	136.941	86403785	\N	\N	\N	\N	sequence-specific DNA binding transcription factor activity	GO:0003700	#N/A	#N/A	Solyc01g107170.2	0	0	0		0.0041308	4.32459	4.32459	ARF2sm-42R up vs wt-42G	0	0	0
Solyc01g107740.2		ARF2sm-42R vs wt-42G diff			ARF2sm-42R up vs wt-42G		ARF2sm-42R up vs wt-42G	Protein unc-13 homolog C (AHRD V1 *--- UN13C_MOUSE)%3B contains Interpro domain(s) IPR	at4g34150.1	| symbols: | calcium-dependent lipid-binding (calb domain) family protein | chr4:163550	Solyc01g107740.2.1	SL2.40ch01	86945729	86948859	TGS3285	138.597	87346925	TES0985	136.43	86940830	\N	\N	\N	\N	\N	\N	#N/A	#N/A	Solyc01g107740.2	0	0	0		0.00388393	2.71862	2.71862	ARF2sm-42R up vs wt-42G	0	0	0
Solyc01g109160.2		ARF2sm-42R vs wt-42G diff			ARF2sm-42R up vs wt-42G		ARF2sm-42R up vs wt-42G	cytochrome P450	at5g42650.1	| symbols: aos cyp74a dde2 | allene oxide synthase | chr5:17097803-17099359 reverse l	Solyc01g109160.2.1	SL2.40ch01	87972865	87975159	C2_At4g34350	143.667	88051532	tma0143	142.318	87956011	\N	\N	\N	\N	allene oxide synthase activity	GO:0009978	NA	cytochrome P450	Solyc01g109160.2	0	0	0		5.14529e-05	4.23478	4.23478	ARF2sm-42R up vs wt-42G	0	0	0
Solyc01g109680.2		ARF2sm-42R vs wt-42G diff			ARF2sm-42R up vs wt-42G		ARF2sm-42R up vs wt-42G	Unknown Protein (AHRD V1)	at4g39235.1	| symbols: | unknown protein best arabidopsis thaliana protein match is: unknown prote	Solyc01g109680.2.1	SL2.40ch01	88334992	88335716	TEI0866	149.457	88530109	T1782	145.117	88188046	\N	\N	\N	\N	\N	\N	#N/A	#N/A	Solyc01g109680.2	0	0	0		0.000326768	4.01066	4.01066	ARF2sm-42R up vs wt-42G	0	0	0
Solyc01g112110.2		ARF2sm-42R vs wt-42G diff			ARF2sm-42R up vs wt-42G		ARF2sm-42R up vs wt-42G	Unknown Protein (AHRD V1)													\N	\N	\N	\N	\N	\N	#N/A	#N/A	Solyc01g112110.2	0	0	0		0.00436388	2.16364	2.16364	ARF2sm-42R up vs wt-42G	0	0	0
Solyc01g112320.2		ARF2sm-42R vs wt-42G diff			ARF2sm-42R up vs wt-42G		ARF2sm-42R up vs wt-42G	Protein FAR1-RELATED SEQUENCE 5 (AHRD V1 ***- FRS5_ARATH)%3B contains Interpro domain(s	at4g38180.1	| symbols: frs5 | far1-related sequence 5 | chr4:17906702-17909404 reverse length=788	Solyc01g112320.2.1	SL2.40ch01	90169312	90174218	\NA	\NA	\NA	T1306	153.657	90108665	\N	\N	\N	\N	zinc ion binding	GO:0008270	#N/A	#N/A	Solyc01g112320.2	0	0	0		7.22434e-05	2.0217	2.0217	ARF2sm-42R up vs wt-42G	0	0	0
Solyc02g031980.2		ARF2sm-42R vs wt-42G diff			ARF2sm-42R up vs wt-42G		ARF2sm-42R up vs wt-42G	Urease accessory protein ureD (AHRD V1 ***- B9A9D1_MORAL)%3B contains Interpro domain(s	at2g35035.1	| symbols: ured | urease accessory protein d | chr2:14763387-14765045 reverse length=29	Solyc02g031980.2.1	SL2.40ch02	17941729	17949640	TGS2414	3.239	18518898	TGS2279	2.426	15993856	nitrogen compound metabolic process	GO:0006807	\N	\N	\N	\N	#N/A	#N/A	Solyc02g031980.2	0	0	0		0.00315189	2.34313	2.34313	ARF2sm-42R up vs wt-42G	0	0	0
Solyc02g032930.2		ARF2sm-42R vs wt-42G diff			ARF2sm-42R up vs wt-42G		ARF2sm-42R up vs wt-42G	B-cell receptor-associated protein 31-like containing protein (AHRD V1 ***- B6TG43_MAIZ	at5g42570.1	| symbols: | b-cell receptor-associated 31-like | chr5:17021459-17022497 reverse length	Solyc02g032930.2.1	SL2.40ch02	20179350	20185331	TEI0920	1.118	21280857	TGS3056	1.948	19637200	\N	\N	integral to membrane	GO:0016021	\N	\N	#N/A	#N/A	Solyc02g032930.2	0	0	0		7.02747e-05	2.01872	2.01872	ARF2sm-42R up vs wt-42G	0	0	0
Solyc02g062420.2		ARF2sm-42R vs wt-42G diff			ARF2sm-42R up vs wt-42G		ARF2sm-42R up vs wt-42G	Transmembrane protein 222 (Fragment) (AHRD V1 **-- Q5SSC2_HUMAN)%3B contains Interpro d	at3g51040.3	| symbols: rth | rte1-homolog | chr3:18952281-18953060 reverse length=231	Solyc02g062420.2.1	SL2.40ch02	28605681	28607166	TES0332	12.045	28751988	tma0121	4.723	27429541	\N	\N	\N	\N	protein binding	GO:0005515	#N/A	#N/A	Solyc02g062420.2	0	0	0		0.000132294	2.06709	2.06709	ARF2sm-42R up vs wt-42G	0	0	0
Solyc02g063160.2		ARF2sm-42R vs wt-42G diff			ARF2sm-42R up vs wt-42G		ARF2sm-42R up vs wt-42G	Lipase-like protein (AHRD V1 **-- Q9LF16_ARATH)%3B contains Interpro domain(s) IPR0000	at5g16120.2	| symbols: | alpha/beta-hydrolases superfamily protein | chr5:5265820-5267775 forward l	Solyc02g063160.2.1	SL2.40ch02	29811816	29817553	TEI0565	15.771	30145525	T1117	14.887	29792128	\N	\N	\N	\N	lipid binding lysophospholipase activity	GO:0008289 GO:0004622	NA	hydrolase	Solyc02g063160.2	0	0	0		0.00216747	2.64282	2.64282	ARF2sm-42R up vs wt-42G	0	0	0
Solyc02g067070.2		ARF2sm-42R vs wt-42G diff			ARF2sm-42R up vs wt-42G		ARF2sm-42R up vs wt-42G	Unknown Protein (AHRD V1)%3B contains Interpro domain(s) IPR003604 Zinc finger%2C U1-	at5g61190.1	| symbols: | putative endonuclease or glycosyl hydrolase with c2h2-type zinc finger dom	Solyc02g067070.2.1	SL2.40ch02	31881479	31885739	T869	24.052	31942052	T1706	22.189	31792652	\N	\N	intracellular	GO:0005622	zinc ion binding	GO:0008270	#N/A	#N/A	Solyc02g067070.2	0	0	0		0.00157301	2.26954	2.26954	ARF2sm-42R up vs wt-42G	0	0	0
Solyc02g067440.2		ARF2sm-42R vs wt-42G diff			ARF2sm-42R up vs wt-42G		ARF2sm-42R up vs wt-42G	Cupin RmlC-type (AHRD V1 **-- B4F886_MAIZE)%3B contains Interpro domain(s) IPR012864	at5g39890.1	| symbols: | protein of unknown function (duf1637) | chr5:15974543-15976013 forward len	Solyc02g067440.2.1	SL2.40ch02	32204041	32207715	SSR40	26.45	32277637	TEI0387	26.019	32184924	oxidation-reduction process	GO:0055114	\N	\N	\N	\N	#N/A	#N/A	Solyc02g067440.2	0	0	0		0.0022435	2.52336	2.52336	ARF2sm-42R up vs wt-42G	0	0	0
Solyc02g069470.2		ARF2sm-42R vs wt-42G diff			ARF2sm-42R up vs wt-42G		ARF2sm-42R up vs wt-42G	Inter-alpha-trypsin inhibitor heavy chain H3 (AHRD V1 *--- ITIH3_MESAU)%3B contains Int	at5g60710.1	| symbols: | zinc finger (c3hc4-type ring finger) family protein | chr5:24410953-244148	Solyc02g069470.2.1	SL2.40ch02	33920445	33924829	TES0074	43.093	33968997	T697	42.339	33918688	\N	\N	\N	\N	ubiquitin-protein ligase activity	GO:0004842	NA	ubiquitin-protein ligase	Solyc02g069470.2	0	0	0		0.00386735	3.53648	3.53648	ARF2sm-42R up vs wt-42G	0	0	0
Solyc02g070580.1		ARF2sm-42R vs wt-42G diff			ARF2sm-42R up vs wt-42G		ARF2sm-42R up vs wt-42G	Cytochrome p450 Cytochrome p450	at2g34500.1	| symbols: cyp710a1 | cytochrome p450 family 710 subfamily a polypeptide 1 | chr2:14	Solyc02g070580.1.1	SL2.40ch02	34885987	34887492	T1516	48.446	34958914	TES0037	45.592	34800197	\N	\N	\N	\N	oxygen binding C-22 sterol desaturase activity	GO:0019825 GO:0000249	NA	Cytochrome p450	Solyc02g070580.1	0	0	0		0.000616525	2.44829	2.44829	ARF2sm-42R up vs wt-42G	0	0	0
Solyc02g070690.1		ARF2sm-42R vs wt-42G diff			ARF2sm-42R up vs wt-42G		ARF2sm-42R up vs wt-42G	C2 domain-containing protein (AHRD V1 ***- D7LFS6_ARALY)%3B contains Interpro domain(s)	at2g33320.1	| symbols: | calcium-dependent lipid-binding (calb domain) family protein | chr2:141195	Solyc02g070690.1.1	SL2.40ch02	34932679	34933278	T1516	48.446	34958914	TES0037	45.592	34800197	\N	\N	\N	\N	\N	\N	#N/A	#N/A	Solyc02g070690.1	0	0	0		0.00447329	3.48316	3.48316	ARF2sm-42R up vs wt-42G	0	0	0
Solyc02g072190.2		ARF2sm-42R vs wt-42G diff			ARF2sm-42R up vs wt-42G		ARF2sm-42R up vs wt-42G	WRKY transcription factor 5 (AHRD V1 ***- A7UGD2_SOLTU)%3B contains Interpro domain(s)	at1g29280.1	| symbols: wrky65 atwrky65 | wrky dna-binding protein 65 | chr1:10236589-10237467 forw	Solyc02g072190.2.1	SL2.40ch02	36084177	36085943	U242666	56.515	36108184	T1665	56.982	36077664	\N	\N	\N	\N	\N	\N	#N/A	#N/A	Solyc02g072190.2	0	0	0		0.00978304	5.02698	5.02698	ARF2sm-42R up vs wt-42G	0	0	0
Solyc02g076660.2		ARF2sm-42R vs wt-42G diff			ARF2sm-42R up vs wt-42G		ARF2sm-42R up vs wt-42G	Receptor like kinase%2C RLK	at4g18640.1	| symbols: mrh1 | leucine-rich repeat protein kinase family protein | chr4:10260481-102	Solyc02g076660.2.1	SL2.40ch02	36378345	36383412	cLEW-17-M24	59.745	36443787	TGS0541	58.071	36234723	protein phosphorylation	GO:0006468	\N	\N	protein binding	GO:0005515	NA	Receptor like kinase%2C RLK	Solyc02g076660.2	0	0	0		0.0019272	2.34302	2.34302	ARF2sm-42R up vs wt-42G	0	0	0
Solyc02g076760.2		ARF2sm-42R vs wt-42G diff			ARF2sm-42R up vs wt-42G		ARF2sm-42R up vs wt-42G	N-(5%26apos-phosphoribosyl)anthranilate isomerase (AHRD V1 **** B9SQM9_RICCO)%3B contai	at1g07780.5	| symbols: pai1 | phosphoribosylanthranilate isomerase 1 | chr1:2410352-2411833 reverse	Solyc02g076760.2.1	SL2.40ch02	36441000	36442296	cLEW-17-M24	59.745	36443787	TGS0541	58.071	36234723	\N	\N	\N	\N	phosphoribosylanthranilate isomerase activity glutamate racemase activity	GO:0004640 GO:0008881	peptidoglycan biosynthesis I	glutamate racemase	Solyc02g076760.2	0	0	0		0.00964922	2.17885	2.17885	ARF2sm-42R up vs wt-42G	0	0	0
Solyc02g077610.2		ARF2sm-42R vs wt-42G diff			ARF2sm-42R up vs wt-42G		ARF2sm-42R up vs wt-42G	NAC domain protein IPR003441 (AHRD V1 ***- B9H2Q1_POPTR)%3B contains Interpro domain(s)	at4g28500.1	| symbols: anac073 snd2 nac073 | nac domain containing protein 73 | chr4:14083014-140	Solyc02g077610.2.1	SL2.40ch02	37073622	37077632	TES0458	64.793	37090017	TEI0633	60.534	36819521	\N	\N	\N	\N	sequence-specific DNA binding transcription factor activity	GO:0003700	#N/A	#N/A	Solyc02g077610.2	0	0	0		0.00509324	3.67178	3.67178	ARF2sm-42R up vs wt-42G	0	0	0
Solyc02g077780.2		ARF2sm-42R vs wt-42G diff			ARF2sm-42R up vs wt-42G		ARF2sm-42R up vs wt-42G	Necrotic spotted lesions 1 (Fragment) (AHRD V1 *-*- B6ZA38_HELPE)%3B contains Interpro	at1g28380.1	| symbols: nsl1 | mac/perforin domain-containing protein | chr1:9963696-9966060 forward	Solyc02g077780.2.1	SL2.40ch02	37203757	37212202	TES1976	66.855	37435987	TES0458	64.793	37090017	\N	\N	\N	\N	\N	\N	#N/A	#N/A	Solyc02g077780.2	0	0	0		0.0079812	2.03837	2.03837	ARF2sm-42R up vs wt-42G	0	0	0
Solyc02g078820.2		ARF2sm-42R vs wt-42G diff			ARF2sm-42R up vs wt-42G		ARF2sm-42R up vs wt-42G	Lysine ketoglutarate reductase trans-splicing related 1 (AHRD V1 ***- Q8H767_ARATH)%3B	at1g61240.4	| symbols: | protein of unknown function (duf707) | chr1:22582537-22585050 forward leng	Solyc02g078820.2.1	SL2.40ch02	38056053	38061203	TGS1548	77.521	38125282	TES0912	71.792	37905762	\N	\N	\N	\N	\N	\N	#N/A	#N/A	Solyc02g078820.2	0	0	0		0.00220706	2.77405	2.77405	ARF2sm-42R up vs wt-42G	0	0	0
Solyc02g078980.2		ARF2sm-42R vs wt-42G diff			ARF2sm-42R up vs wt-42G		ARF2sm-42R up vs wt-42G	Deoxyribonuclease TatD family (AHRD V1 ***- Q3DD21_STRAG)%3B contains Interpro domain(s	at5g17570.1	| symbols: | tatd related dnase | chr5:5792948-5794580 forward length=325 | symbols: |	Solyc02g078980.2.1	SL2.40ch02	38167769	38169000	TES0992	79.866	38575021	TEI0339	77.931	38133440	\N	\N	\N	\N	3'-5'-exodeoxyribonuclease activity protein binding	GO:0008296 GO:0005515	#N/A	#N/A	Solyc02g078980.2	0	0	0		0.00160476	2.00999	2.00999	ARF2sm-42R up vs wt-42G	0	0	0
Solyc02g079230.2		ARF2sm-42R vs wt-42G diff			ARF2sm-42R up vs wt-42G		ARF2sm-42R up vs wt-42G	Vesicle-associated membrane family protein (AHRD V1 ***- D7MET3_ARALY)%3B contains Inte	at4g21450.1	| symbols: | papd-like superfamily protein | chr4:11426136-11428125 forward length=295	Solyc02g079230.2.1	SL2.40ch02	38419981	38424111	TES0992	79.866	38575021	TEI0339	77.931	38133440	\N	\N	\N	\N	structural molecule activity	GO:0005198	#N/A	#N/A	Solyc02g079230.2	0	0	0		0.000525255	2.59471	2.59471	ARF2sm-42R up vs wt-42G	0	0	0
Solyc02g079750.2		ARF2sm-42R vs wt-42G diff			ARF2sm-42R up vs wt-42G		ARF2sm-42R up vs wt-42G	Flavoprotein wrbA (AHRD V1 ***- B6U724_MAIZE)%3B contains Interpro domain(s) IPR010089	at5g54500.1	| symbols: fqr1 | flavodoxin-like quinone reductase 1 | chr5:22124674-22126256 forward	Solyc02g079750.2.1	SL2.40ch02	38774685	38777292	TES1042	82.53	38855898	TES0992	79.866	38575021	\N	\N	\N	\N	identical protein binding	GO:0042802	NA	quinone reductase family protein	Solyc02g079750.2	0	0	0		0.00290179	3.37368	3.37368	ARF2sm-42R up vs wt-42G	0	0	0
Solyc02g079770.2		ARF2sm-42R vs wt-42G diff			ARF2sm-42R up vs wt-42G		ARF2sm-42R up vs wt-42G	DAG protein (AHRD V1 ***- B6TYI4_MAIZE)	at1g11430.1	| symbols: | plastid developmental protein dag putative | chr1:3847273-3848938 forward	Solyc02g079770.2.1	SL2.40ch02	38805497	38807567	TES1042	82.53	38855898	TES0992	79.866	38575021	\N	\N	\N	\N	\N	\N	#N/A	#N/A	Solyc02g079770.2	0	0	0		0.00145599	2.15888	2.15888	ARF2sm-42R up vs wt-42G	0	0	0
Solyc02g080070.2		ARF2sm-42R vs wt-42G diff			ARF2sm-42R up vs wt-42G		ARF2sm-42R up vs wt-42G	RLK%2C Receptor like protein%2C putative resistance protein with an antifungal domain R	at4g23180.1	| symbols: crk10 rlk4 | cysteine-rich rlk (receptor-like protein kinase) 10 | chr4:121	Solyc02g080070.2.1	SL2.40ch02	38960023	38964200	TGS1462	81.199	39155721	cLET3K13	81.847	38908752	\N	\N	\N	\N	protein kinase activity protein binding	GO:0004672 GO:0005515	NA	protein kinase	Solyc02g080070.2	0	0	0		0.0041518	2.79742	2.79742	ARF2sm-42R up vs wt-42G	0	0	0
Solyc02g080110.2		ARF2sm-42R vs wt-42G diff			ARF2sm-42R up vs wt-42G		ARF2sm-42R up vs wt-42G	Unknown Protein (AHRD V1)	at4g21215.2	| symbols: | unknown protein has 35333 blast hits to 34131 proteins in 2444 species: a	Solyc02g080110.2.1	SL2.40ch02	38992536	38995729	TGS1462	81.199	39155721	cLET3K13	81.847	38908752	\N	\N	\N	\N	\N	\N	#N/A	#N/A	Solyc02g080110.2	0	0	0		0.00263743	2.55779	2.55779	ARF2sm-42R up vs wt-42G	0	0	0
Solyc02g080180.1		ARF2sm-42R vs wt-42G diff			ARF2sm-42R up vs wt-42G		ARF2sm-42R up vs wt-42G	Oligosaccharide transporter (AHRD V1 **-* B4FSV8_MAIZE)%3B contains Interpro domain(s)	at1g61790.1	| symbols: | oligosaccharyltransferase complex/magnesium transporter family protein | c	Solyc02g080180.1.1	SL2.40ch02	39052203	39053231	TGS1462	81.199	39155721	cLET3K13	81.847	38908752	\N	\N	\N	\N	oligosaccharide transmembrane transporter activity	GO:0015157	#N/A	#N/A	Solyc02g080180.1	0	0	0		0.00048823	2.34781	2.34781	ARF2sm-42R up vs wt-42G	0	0	0
Solyc02g080430.2		ARF2sm-42R vs wt-42G diff			ARF2sm-42R up vs wt-42G		ARF2sm-42R up vs wt-42G	Mediator of RNA polymerase II transcription subunit 21 (AHRD V1 ***- MED21_CAEEL)	at4g04780.1	| symbols: med21 | mediator 21 | chr4:2432665-2433397 forward length=139	Solyc02g080430.2.1	SL2.40ch02	39228823	39231117	cLEF50C16	81.92	39294725	TGS1462	81.199	39155721	\N	\N	\N	\N	\N	\N	#N/A	#N/A	Solyc02g080430.2	0	0	0		0.00338975	2.0334	2.0334	ARF2sm-42R up vs wt-42G	0	0	0
Solyc02g081480.2		ARF2sm-42R vs wt-42G diff			ARF2sm-42R up vs wt-42G		ARF2sm-42R up vs wt-42G	Receptor kinase (AHRD V1 ***- Q9SWF1_ORYSA)%3B contains Interpro domain(s) IPR002290	at1g66920.1	| symbols: | protein kinase superfamily protein | chr1:24965410-24967432 reverse length	Solyc02g081480.2.1	SL2.40ch02	40008799	40010960	TES0614	87.281	40196888	T702	85.903	39983752	protein phosphorylation	GO:0006468	\N	\N	\N	\N	NA	Receptor kinase	Solyc02g081480.2	0	0	0		0.00210443	2.59828	2.59828	ARF2sm-42R up vs wt-42G	0	0	0
Solyc02g083170.2		ARF2sm-42R vs wt-42G diff			ARF2sm-42R up vs wt-42G		ARF2sm-42R up vs wt-42G	F-box family protein (AHRD V1 ***- B9MX86_POPTR)%3B contains Interpro domain(s) IPR001	at2g17030.1	| symbols: | f-box family protein with a domain of unknown function (duf295) | chr2:739	Solyc02g083170.2.1	SL2.40ch02	41252010	41253969	T759	90.377	41285289	TES0378	89.66	41208626	\N	\N	\N	\N	\N	\N	#N/A	#N/A	Solyc02g083170.2	0	0	0		0.00630117	2.57079	2.57079	ARF2sm-42R up vs wt-42G	0	0	0
Solyc02g084570.2		ARF2sm-42R vs wt-42G diff			ARF2sm-42R up vs wt-42G		ARF2sm-42R up vs wt-42G	Cytochrome P450	at4g36220.1	| symbols: fah1 cyp84a1 | ferulic acid 5-hydroxylase 1 | chr4:17137584-17139619 revers	Solyc02g084570.2.1	SL2.40ch02	42225222	42229073	TES0373	96.873	42257111	TES1149	92.679	42082881	\N	\N	\N	\N	oxygen binding	GO:0019825	NA	Cytochrome P450	Solyc02g084570.2	0	0	0		0.0013509	2.7724	2.7724	ARF2sm-42R up vs wt-42G	0	0	0
Solyc02g085640.2		ARF2sm-42R vs wt-42G diff			ARF2sm-42R up vs wt-42G		ARF2sm-42R up vs wt-42G	Xaa-Pro aminopeptidase 1 (AHRD V1 ***- Q93X46_SOLLC)%3B contains Interpro domain(s) IP	at4g36760.1	| symbols: atapp1 app1 | aminopeptidase p1 | chr4:17326688-17329979 forward length=645	Solyc02g085640.2.1	SL2.40ch02	43050620	43059519	TES1669	97.323	43214388	TES0368	98.503	42996583	\N	\N	\N	\N	metalloaminopeptidase activity	GO:0070006	NA	aminopeptidase P1	Solyc02g085640.2	0	0	0		0.000107964	2.09025	2.09025	ARF2sm-42R up vs wt-42G	0	0	0
Solyc02g087340.2		ARF2sm-42R vs wt-42G diff			ARF2sm-42R up vs wt-42G		ARF2sm-42R up vs wt-42G	Seed maturation protein PM23 (Fragment) (AHRD V1 ***- Q9SEL1_SOYBN)	at5g14970.1	| symbols: | unknown protein best arabidopsis thaliana protein match is: unknown prote	Solyc02g087340.2.1	SL2.40ch02	44349601	44352908	TGS3413	107.565	44464850	TGS1372	105.475	44323367	\N	\N	\N	\N	\N	\N	#N/A	#N/A	Solyc02g087340.2	0	0	0		0.00174634	2.1629	2.1629	ARF2sm-42R up vs wt-42G	0	0	0
Solyc02g087500.1		ARF2sm-42R vs wt-42G diff			ARF2sm-42R up vs wt-42G		ARF2sm-42R up vs wt-42G	ER glycerol-phosphate acyltransferase (AHRD V1 **** B9S2F2_RICCO)%3B contains Interpro	at2g38110.1	| symbols: atgpat6 gpat6 | glycerol-3-phosphate acyltransferase 6 | chr2:15952816-1595	Solyc02g087500.1.1	SL2.40ch02	44500692	44502990	TEI0392	108.402	44637486	TGS3413	107.565	44464850	\N	\N	\N	\N	1-acylglycerol-3-phosphate O-acyltransferase activity glycerol-3-phosphate O-acyltransf	GO:0003841 GO:0004366	CDP-diacylglycerol biosynthesis II	Glycerol-3-phosphate acyltransferase 6	Solyc02g087500.1	0	0	0		0.000545564	4.90273	4.90273	ARF2sm-42R up vs wt-42G	0	0	0
Solyc02g087740.2		ARF2sm-42R vs wt-42G diff			ARF2sm-42R up vs wt-42G		ARF2sm-42R up vs wt-42G	Cupin RmlC-type (AHRD V1 **-- B4F886_MAIZE)%3B contains Interpro domain(s) IPR012864	at5g39890.1	| symbols: | protein of unknown function (duf1637) | chr5:15974543-15976013 forward len	Solyc02g087740.2.1	SL2.40ch02	44629695	44632575	TEI0392	108.402	44637486	TGS3413	107.565	44464850	oxidation-reduction process	GO:0055114	\N	\N	\N	\N	#N/A	#N/A	Solyc02g087740.2	0	0	0		0.00601055	2.96243	2.96243	ARF2sm-42R up vs wt-42G	0	0	0
Solyc02g088200.2		ARF2sm-42R vs wt-42G diff			ARF2sm-42R up vs wt-42G		ARF2sm-42R up vs wt-42G	Activating signal cointegrator 1 complex subunit 1 (AHRD V1 **-- C3KHG7_ANOFI)	at3g16230.3	| symbols: | predicted eukaryotic ligt | chr3:5500991-5503303 forward length=409	Solyc02g088200.2.1	SL2.40ch02	44944625	44947657	TGS3319	116.931	45040289	TES1003	111.776	44676210	\N	\N	\N	\N	\N	\N	#N/A	#N/A	Solyc02g088200.2	0	0	0		0.00049803	2.94111	2.94111	ARF2sm-42R up vs wt-42G	0	0	0
Solyc02g088460.2		ARF2sm-42R vs wt-42G diff			ARF2sm-42R up vs wt-42G		ARF2sm-42R up vs wt-42G	Chorismate mutase 1 (AHRD V1 **** D2CSU4_PETHY)%3B contains Interpro domain(s) IPR0082	at3g29200.1	| symbols: cm1 atcm1 | chorismate mutase 1 | chr3:11164582-11166258 reverse length=340	Solyc02g088460.2.1	SL2.40ch02	45123129	45127345	TGS2811	116.129	45134548	TGS3319	116.931	45040289	\N	\N	\N	\N	chorismate mutase activity protein homodimerization activity	GO:0004106 GO:0042803	phenylalanine biosynthesis I	chorismate mutase	Solyc02g088460.2	0	0	0		0.0009551	2.19308	2.19308	ARF2sm-42R up vs wt-42G	0	0	0
Solyc02g088560.2		ARF2sm-42R vs wt-42G diff			ARF2sm-42R up vs wt-42G		ARF2sm-42R up vs wt-42G	Cyclic nucleotide gated channel (AHRD V1 **** A9CRE4_MALDO)%3B contains Interpro domain	at5g15410.1	| symbols: dnd1 atcngc2 cngc2 | cyclic nucleotide-regulated ion channel family protei	Solyc02g088560.2.1	SL2.40ch02	45186246	45190069	TEI0412	120.672	45223322	TGS2811	116.129	45134548	\N	\N	\N	\N	intracellular cAMP activated cation channel activity	GO:0005222	#N/A	#N/A	Solyc02g088560.2	0	0	0		0.00753114	2.12854	2.12854	ARF2sm-42R up vs wt-42G	0	0	0
Solyc02g088790.2		ARF2sm-42R vs wt-42G diff			ARF2sm-42R up vs wt-42G		ARF2sm-42R up vs wt-42G	RNA-binding protein (AHRD V1 *-** Q941H8_SOLTU)%3B contains Interpro domain(s) IPR0154	at5g61030.1	| symbols: gr-rbp3 | glycine-rich rna-binding protein 3 | chr5:24560870-24562152 forwar	Solyc02g088790.2.1	SL2.40ch02	45342858	45345771	TES1711	119.609	45348299	TEI0412	120.672	45223322	\N	\N	\N	\N	mRNA 3'-UTR binding	GO:0003730	#N/A	#N/A	Solyc02g088790.2	0	0	0		0.00084886	2.40303	2.40303	ARF2sm-42R up vs wt-42G	0	0	0
Solyc02g089400.2		ARF2sm-42R vs wt-42G diff			ARF2sm-42R up vs wt-42G		ARF2sm-42R up vs wt-42G	Amino acid transporter (AHRD V1 ***- B9N1V7_POPTR)%3B contains Interpro domain(s) IPR0	at3g30390.2	| symbols: | transmembrane amino acid transporter family protein | chr3:11977112-119788	Solyc02g089400.2.1	SL2.40ch02	45808288	45812363	TGS1770	123.698	46007383	cLES3G11	122.997	45807448	\N	\N	\N	\N	\N	\N	#N/A	#N/A	Solyc02g089400.2	0	0	0		0.00939345	2.01941	2.01941	ARF2sm-42R up vs wt-42G	0	0	0
Solyc02g089490.2		ARF2sm-42R vs wt-42G diff			ARF2sm-42R up vs wt-42G		ARF2sm-42R up vs wt-42G	Unknown Protein (AHRD V1)	none	none	Solyc02g089490.2.1	SL2.40ch02	45882394	45884406	TGS1770	123.698	46007383	cLES3G11	122.997	45807448	\N	\N	\N	\N	\N	\N	#N/A	#N/A	Solyc02g089490.2	0	0	0		0.00939564	4.03365	4.03365	ARF2sm-42R up vs wt-42G	0	0	0
Solyc02g089530.2		ARF2sm-42R vs wt-42G diff			ARF2sm-42R up vs wt-42G		ARF2sm-42R up vs wt-42G	Unknown Protein (AHRD V1)	none	none	Solyc02g089530.2.1	SL2.40ch02	45896347	45900402	TGS1770	123.698	46007383	cLES3G11	122.997	45807448	\N	\N	\N	\N	\N	\N	#N/A	#N/A	Solyc02g089530.2	0	0	0		0.00516563	4.99672	4.99672	ARF2sm-42R up vs wt-42G	0	0	0
Solyc02g090820.2		ARF2sm-42R vs wt-42G diff			ARF2sm-42R up vs wt-42G		ARF2sm-42R up vs wt-42G	Heat stress transcription factor (AHRD V1 **** D4QAU8_CARPA)%3B contains Interpro domai	at4g36990.1	| symbols: hsf4 hsfb1 at-hsfb1 athsf4 | heat shock factor 4 | chr4:17440660-17441706	Solyc02g090820.2.1	SL2.40ch02	46880125	46883382	TGS3418	132.801	47037420	T1744	130.946	46761274	\N	\N	\N	\N	DNA binding	GO:0003677	#N/A	#N/A	Solyc02g090820.2	0	0	0		0.00759333	2.54748	2.54748	ARF2sm-42R up vs wt-42G	0	0	0
Solyc02g091650.2		ARF2sm-42R vs wt-42G diff			ARF2sm-42R up vs wt-42G		ARF2sm-42R up vs wt-42G	Glycine-rich protein (Fragment) (AHRD V1 *--- Q677B7_HYAOR)%3B contains Interpro domain	at2g22660.2	| symbols: | protein of unknown function (duplicated duf1399) | chr2:9627737-9630840 fo	Solyc02g091650.2.1	SL2.40ch02	47471715	47476114	TES1644	139.344	47968139	T1400	132.163	47153396	\N	\N	\N	\N	\N	\N	#N/A	#N/A	Solyc02g091650.2	0	0	0		0.000315055	3.37206	3.37206	ARF2sm-42R up vs wt-42G	0	0	0
Solyc02g091700.2		ARF2sm-42R vs wt-42G diff			ARF2sm-42R up vs wt-42G		ARF2sm-42R up vs wt-42G	Hydroxyproline-rich glycoprotein (AHRD V1 ***- A9YWR1_MEDTR)	at5g65660.1	| symbols: | hydroxyproline-rich glycoprotein family protein | chr5:26245444-26246245 r	Solyc02g091700.2.1	SL2.40ch02	47514511	47515716	TES1644	139.344	47968139	T1400	132.163	47153396	\N	\N	\N	\N	\N	\N	#N/A	#N/A	Solyc02g091700.2	0	0	0		0.000697611	4.39582	4.39582	ARF2sm-42R up vs wt-42G	0	0	0
Solyc00g050430.2	ARF2sm-42Gvswt-42G diff			ARF2sm-42G up vs wt-42G			ARF2sm-42G up vs wt-42G	BHLH transcription factor (AHRD V1 *-*- A9YWR2_MEDTR)%3B contains Interpro domain(s) I	at5g65640.1	| symbols: bhlh093 | beta hlh protein 93 | chr5:26237137-26238904 forward length=351	Solyc00g050430.2.1	SL2.40ch00	13663836	13666165	CD40	11.41	15060146	TGS2081	64.89	13137846	\N	\N	nucleus	GO:0005634	\N	\N	#N/A	#N/A	Solyc00g050430.2	0.000226168	2.62665	2.62665	ARF2sm-42G up vs wt-42G	0	0	0		0	0	0
Solyc01g007870.2	ARF2sm-42Gvswt-42G diff			ARF2sm-42G up vs wt-42G			ARF2sm-42G up vs wt-42G	Cyclin B-like protein (AHRD V1 *-*- Q5U8T5_9SOLA)	at3g11600.1	| symbols: | unknown protein functions in: molecular_function unknown involved in: re	Solyc01g007870.2.1	SL2.40ch01	2032117	2032858	TES0233	24.101	2119835	TES0943	24.131	1801278	\N	\N	\N	\N	\N	\N	#N/A	#N/A	Solyc01g007870.2	0.00239841	5.02109	5.02109	ARF2sm-42G up vs wt-42G	0	0	0		0	0	0
Solyc01g009860.2	ARF2sm-42Gvswt-42G diff			ARF2sm-42G up vs wt-42G			ARF2sm-42G up vs wt-42G	NAC domain transcription factor (AHRD V1 **** Q5DM36_WHEAT)%3B contains Interpro domain	at5g13180.1	| symbols: anac083 vni2 nac083 | nac domain containing protein 83 | chr5:4196643-4197	Solyc01g009860.2.1	SL2.40ch01	4382336	4384348	TGS1270	26.167	4614137	TES0277	27.365	4157034	\N	\N	\N	\N	sequence-specific DNA binding transcription factor activity	GO:0003700	#N/A	#N/A	Solyc01g009860.2	0.000237237	5.69778	5.69778	ARF2sm-42G up vs wt-42G	0	0	0		0	0	0
Solyc01g086680.2	ARF2sm-42Gvswt-42G diff			ARF2sm-42G up vs wt-42G			ARF2sm-42G up vs wt-42G	Glutathione S-transferase (AHRD V1 ***- D8UY87_GLYSO)%3B contains Interpro domain(s) I	at3g09270.1	| symbols: atgstu8 gstu8 | glutathione s-transferase tau 8 | chr3:2848407-2849226 reve	Solyc01g086680.2.1	SL2.40ch01	73403385	73405242	TES1849	47.788	73559725	TEI0133	50.177	72900264	\N	\N	\N	\N	\N	\N	glutathione-mediated detoxification	Glutathione S-transferase	Solyc01g086680.2	0.000125382	6.90306	6.90306	ARF2sm-42G up vs wt-42G	0	0	0		0	0	0
Solyc01g090410.2	ARF2sm-42Gvswt-42G diff			ARF2sm-42G up vs wt-42G			ARF2sm-42G up vs wt-42G	Palmitoyl protein thioesterase family protein (AHRD V1 **** D7LRP2_ARALY)%3B contains I	at3g60340.2	| symbols: | alpha/beta-hydrolases superfamily protein | chr3:22304395-22306389 forward	Solyc01g090410.2.1	SL2.40ch01	75848647	75851160	cLET-5-J13	55.777	75894059	TGS3262	58.833	75715793	\N	\N	\N	\N	palmitoyl-(protein) hydrolase activity	GO:0008474	NA	alpha/beta-Hydrolases superfamily protein	Solyc01g090410.2	0.000861045	2.62506	2.62506	ARF2sm-42G up vs wt-42G	0	0	0		0	0	0
Solyc01g090680.2	ARF2sm-42Gvswt-42G diff			ARF2sm-42G up vs wt-42G			ARF2sm-42G up vs wt-42G	Genomic DNA chromosome 5 TAC clone K11J9 (AHRD V1 *-*- Q9FKH0_ARATH)	at4g25170.1	| symbols: | uncharacterised conserved protein (ucp012943) | chr4:12909740-12911389 for	Solyc01g090680.2.1	SL2.40ch01	76086753	76088289	TES0785	58.439	76477216	cLET-5-J13	55.777	75894059	\N	\N	\N	\N	\N	\N	#N/A	#N/A	Solyc01g090680.2	0.00259144	2.32058	2.32058	ARF2sm-42G up vs wt-42G	0	0	0		0	0	0
Solyc01g096050.2	ARF2sm-42Gvswt-42G diff			ARF2sm-42G up vs wt-42G			ARF2sm-42G up vs wt-42G	Transcription factor (AHRD V1 *--* Q9M4A8_MAIZE)%3B contains Interpro domain(s) IPR011	at1g01260.3	| symbols: | basic helix-loop-helix (bhlh) dna-binding superfamily protein | chr1:10959	Solyc01g096050.2.1	SL2.40ch01	78903296	78905572	TES1414	90.247	79320515	TGS2162	83.85	78788109	\N	\N	\N	\N	sequence-specific DNA binding transcription factor activity	GO:0003700	#N/A	#N/A	Solyc01g096050.2	0.00092147	2.2274	2.2274	ARF2sm-42G up vs wt-42G	0	0	0		0	0	0
Solyc01g097270.2	ARF2sm-42Gvswt-42G diff			ARF2sm-42G up vs wt-42G			ARF2sm-42G up vs wt-42G	Chitinase (Fragment) (AHRD V1 *--- Q38777_ALLSA)%3B contains Interpro domain(s) IPR000	at3g04720.1	| symbols: pr4 hel pr-4 | pathogenesis-related 4 | chr3:1285691-1286531 reverse lengt	Solyc01g097270.2.1	SL2.40ch01	79940651	79942014	TES1752	93.754	79958166	TES0687	90.794	79618494	\N	\N	\N	\N	protein binding	GO:0005515	#N/A	#N/A	Solyc01g097270.2	0.00245396	8.52948	8.52948	ARF2sm-42G up vs wt-42G	0	0	0		0	0	0
Solyc01g099620.2	ARF2sm-42Gvswt-42G diff			ARF2sm-42G up vs wt-42G			ARF2sm-42G up vs wt-42G	Respiratory burst oxidase-like protein (AHRD V1 **** C1IHQ9_9ROSI)%3B contains Interpro	at1g09090.2	| symbols: atrbohb rbohb | respiratory burst oxidase homolog b | chr1:2932743-2936495	Solyc01g099620.2.1	SL2.40ch01	81563045	81567144	TEI0088	106.546	81670760	T1488	103.766	81429728	\N	\N	\N	\N	NAD(P)H oxidase activity	GO:0016174	#N/A	#N/A	Solyc01g099620.2	0.00113963	3.52199	3.52199	ARF2sm-42G up vs wt-42G	0	0	0		0	0	0
Solyc01g108530.2	ARF2sm-42Gvswt-42G diff			ARF2sm-42G up vs wt-42G			ARF2sm-42G up vs wt-42G	Acetyl esterase (AHRD V1 *--- AES_SALPB)%3B contains Interpro domain(s) IPR013094 Alp	at3g48690.1	| symbols: atcxe12 cxe12 | alpha/beta-hydrolases superfamily protein | chr3:18037186-1	Solyc01g108530.2.1	SL2.40ch01	87589549	87591336	T620	139.569	87789581	TGS2899	137.881	87547806	\N	\N	\N	\N	carboxylesterase activity	GO:0004091	NA	alpha/beta-Hydrolases superfamily protein	Solyc01g108530.2	0.00158352	2.70041	2.70041	ARF2sm-42G up vs wt-42G	0	0	0		0	0	0
Solyc02g036350.2	ARF2sm-42Gvswt-42G diff			ARF2sm-42G up vs wt-42G			ARF2sm-42G up vs wt-42G	1-aminocyclopropane-1-carboxylate oxidase (AHRD V1 ***- A4ZYQ6_SOLLC)%3B contains Inter	at1g05010.1	| symbols: efe aco4 eat1 | ethylene-forming enzyme | chr1:1431419-1432695 reverse len	Solyc02g036350.2.1	SL2.40ch02	21279767	21281954	C2_At5g37260	0	21310936	TGS3056	1.948	19637200	\N	\N	\N	\N	flavonol synthase activity	GO:0045431	ethylene biosynthesis from methionine	1-aminocyclopropane-1-carboxylate oxidase	Solyc02g036350.2	0.00240866	11.5881	11.5881	ARF2sm-42G up vs wt-42G	0	0	0		0	0	0
Solyc02g068280.2	ARF2sm-42Gvswt-42G diff			ARF2sm-42G up vs wt-42G			ARF2sm-42G up vs wt-42G	Subtilisin-like serine protease (AHRD V1 **-* C3VDI0_CARPA)%3B contains Interpro domain	at4g10520.1	| symbols: | subtilase family protein | chr4:6499794-6502866 forward length=756 | symbo	Solyc02g068280.2.1	SL2.40ch02	32840326	32844503	T1768	35.54	32900078	TGS0634	35.109	32837805	\N	\N	\N	\N	serine-type endopeptidase activity	GO:0004252	NA	Cucumisin precursor, putative	Solyc02g068280.2	4.93121e-06	3.98167	3.98167	ARF2sm-42G up vs wt-42G	0	0	0		0	0	0
Solyc02g068900.2	ARF2sm-42Gvswt-42G diff			ARF2sm-42G up vs wt-42G			ARF2sm-42G up vs wt-42G	Glutathione transferase (AHRD V1 **** Q2KKB6_THLCA)%3B contains Interpro domain(s) IPR	at4g19880.1	| symbols: | glutathione s-transferase family protein | chr4:10784691-10786376 reverse	Solyc02g068900.2.1	SL2.40ch02	33357285	33361559	TES0531	39.747	33538343	TGS2649	38.813	33338587	\N	\N	\N	\N	glutathione transferase activity	GO:0004364	glutathione-mediated detoxification	glutathione transferase	Solyc02g068900.2	0.000403239	2.35307	2.35307	ARF2sm-42G up vs wt-42G	0	0	0		0	0	0
Solyc02g071470.2	ARF2sm-42Gvswt-42G diff			ARF2sm-42G up vs wt-42G			ARF2sm-42G up vs wt-42G	1-aminocyclopropane-1-carboxylate oxidase 1 (AHRD V1 **-* ACCO1_MALDO)%3B contains Inte													\N	\N	\N	\N	gibberellin 20-oxidase activity	GO:0045544	leucopelargonidin and leucocyanidin biosynthesis	oxidoreductase, acting on diphenols and related substances as donors, oxygen as accepto	Solyc02g071470.2	0.000809973	3.67154	3.67154	ARF2sm-42G up vs wt-42G	0	0	0		0	0	0
Solyc02g080780.2	ARF2sm-42Gvswt-42G diff			ARF2sm-42G up vs wt-42G			ARF2sm-42G up vs wt-42G	Unknown Protein (AHRD V1)	at1g62250.1	| symbols: | unknown protein located in: chloroplast expressed in: 23 plant structure	Solyc02g080780.2.1	SL2.40ch02	39487698	39491256	TEI0071	85.407	39665865	TES1276	82.993	39415367	\N	\N	\N	\N	\N	\N	#N/A	#N/A	Solyc02g080780.2	0.000609755	2.23487	2.23487	ARF2sm-42G up vs wt-42G	0	0	0		0	0	0
Solyc02g081850.2	ARF2sm-42Gvswt-42G diff			ARF2sm-42G up vs wt-42G			ARF2sm-42G up vs wt-42G	Amino acid transporter (AHRD V1 **** C2SWS0_BACCE)%3B contains Interpro domain(s) IPR0	at2g34960.1	| symbols: cat5 | cationic amino acid transporter 5 | chr2:14744175-14745884 reverse le	Solyc02g081850.2.1	SL2.40ch02	40216887	40218847	TM20	86.341	40437671	TES0614	87.281	40196888	\N	\N	\N	\N	cationic amino acid transmembrane transporter activity high affinity arginine transmemb	GO:0015326 GO:0005289	#N/A	#N/A	Solyc02g081850.2	0.00152133	2.33154	2.33154	ARF2sm-42G up vs wt-42G	0	0	0		0	0	0
Solyc02g082900.2	ARF2sm-42Gvswt-42G diff			ARF2sm-42G up vs wt-42G			ARF2sm-42G up vs wt-42G	Strictosidine synthase family protein (AHRD V1 **-- D7LTU8_ARALY)%3B contains Interpro	at3g51440.1	| symbols: | calcium-dependent phosphotriesterase superfamily protein | chr3:19089114-1	Solyc02g082900.2.1	SL2.40ch02	41109528	41112540	cLET-1-A5	88.296	41129157	TGS2417	86.541	40861416	\N	\N	\N	\N	protein binding arylesterase activity	GO:0005515 GO:0004064	NA	arylesterase	Solyc02g082900.2	0.000973353	3.07204	3.07204	ARF2sm-42G up vs wt-42G	0	0	0		0	0	0
Solyc02g089650.2	ARF2sm-42Gvswt-42G diff			ARF2sm-42G up vs wt-42G			ARF2sm-42G up vs wt-42G	Unknown Protein (AHRD V1)%3B contains Interpro domain(s) IPR010683 Protein of unknown	at1g61600.1	| symbols: | protein of unknown function (duf1262) | chr1:22729816-22731182 forward len	Solyc02g089650.2.1	SL2.40ch02	45984452	45986300	TGS1770	123.698	46007383	cLES3G11	122.997	45807448	\N	\N	\N	\N	\N	\N	#N/A	#N/A	Solyc02g089650.2	0.000499873	3.13957	3.13957	ARF2sm-42G up vs wt-42G	0	0	0		0	0	0
Solyc03g032020.2	ARF2sm-42Gvswt-42G diff			ARF2sm-42G up vs wt-42G			ARF2sm-42G up vs wt-42G	Hydroxy-methylglutaryl-coenzyme A reductase (AHRD V1 **** O48624_TOBAC)%3B contains Int	at1g76490.1	| symbols: hmg1 hmgr1 athmgr1 | hydroxy methylglutaryl coa reductase 1 | chr1:2869580	Solyc03g032020.2.1	SL2.40ch03	8796854	8799556	TES1712	49.845	9198684	TES1317	53.41	8795719	\N	\N	\N	\N	hydroxymethylglutaryl-CoA reductase activity	GO:0042282	mevalonate degradation	hydroxymethylglutaryl-CoA reductase	Solyc03g032020.2	0.00308989	4.32501	4.32501	ARF2sm-42G up vs wt-42G	0	0	0		0	0	0
Solyc03g044790.2	ARF2sm-42Gvswt-42G diff			ARF2sm-42G up vs wt-42G			ARF2sm-42G up vs wt-42G	Alpha-hydroxynitrile lyase (AHRD V1 **-- O49897_MANES)%3B contains Interpro domain(s)	at2g23610.1	| symbols: atmes3 mes3 | methyl esterase 3 | chr2:10044410-10046403 reverse length=263	Solyc03g044790.2.1	SL2.40ch03	14505298	14507543	TGS2557	49.337	15046188	TGS2705	47.801	14174762	\N	\N	\N	\N	methyl indole-3-acetate esterase activity methyl salicylate esterase activity	GO:0080030 GO:0080031	NA	methylesterase	Solyc03g044790.2	0.000273508	7.03623	7.03623	ARF2sm-42G up vs wt-42G	0	0	0		0	0	0
Solyc03g096380.2	ARF2sm-42Gvswt-42G diff			ARF2sm-42G up vs wt-42G			ARF2sm-42G up vs wt-42G	Amino acid permease-like protein proline transporter-like protein (AHRD V1 **** Q9FJ34_	at3g55740.1	| symbols: prot2 atprot2 | proline transporter 2 | chr3:20695786-20698157 forward leng	Solyc03g096380.2.1	SL2.40ch03	51873782	51882778	TES0321	59.871	52527998	TES0174	58.728	50421752	\N	\N	\N	\N	L-proline transmembrane transporter activity	GO:0015193	#N/A	#N/A	Solyc03g096380.2	0.000592295	2.69575	2.69575	ARF2sm-42G up vs wt-42G	0	0	0		0	0	0
Solyc03g113130.2	ARF2sm-42Gvswt-42G diff			ARF2sm-42G up vs wt-42G			ARF2sm-42G up vs wt-42G	Cupin RmlC-type (AHRD V1 **-- Q2HVC5_MEDTR)%3B contains Interpro domain(s) IPR012864	at5g15120.1	| symbols: | protein of unknown function (duf1637) | chr5:4898814-4900351 forward lengt	Solyc03g113130.2.1	SL2.40ch03	57451754	57455129	TES1685	79.236	58022788	T196	76.851	57250525	oxidation-reduction process	GO:0055114	\N	\N	\N	\N	#N/A	#N/A	Solyc03g113130.2	0.000835662	3.25272	3.25272	ARF2sm-42G up vs wt-42G	0	0	0		0	0	0
Solyc04g005610.2	ARF2sm-42Gvswt-42G diff			ARF2sm-42G up vs wt-42G			ARF2sm-42G up vs wt-42G	NAC domain transcription factor (AHRD V1 **** Q5DM36_WHEAT)%3B contains Interpro domain	at1g69490.1	| symbols: nap anac029 atnap | nac-like activated by ap3/pi | chr1:26122233-26123222	Solyc04g005610.2.1	SL2.40ch04	405228	406898	TES0030	2.258	1208973	\NA	\NA	\NA	\N	\N	\N	\N	sequence-specific DNA binding transcription factor activity	GO:0003700	#N/A	#N/A	Solyc04g005610.2	0.0006451	4.29291	4.29291	ARF2sm-42G up vs wt-42G	0	0	0		0	0	0
Solyc04g007600.2	ARF2sm-42Gvswt-42G diff			ARF2sm-42G up vs wt-42G			ARF2sm-42G up vs wt-42G	E3 ubiquitin-protein ligase MARCH3 (AHRD V1 *--- B5X3M1_SALSA)%3B contains Interpro dom	at2g01275.2	| symbols: | ring/fyve/phd zinc finger superfamily protein | chr2:142610-143809 reverse	Solyc04g007600.2.1	SL2.40ch04	1283981	1287563	CD59	0	1354939	TEI0494	3.071	1237811	\N	\N	\N	\N	protein binding	GO:0005515	#N/A	#N/A	Solyc04g007600.2	0.00211178	2.07148	2.07148	ARF2sm-42G up vs wt-42G	0	0	0		0	0	0
Solyc04g012150.2	ARF2sm-42Gvswt-42G diff			ARF2sm-42G up vs wt-42G			ARF2sm-42G up vs wt-42G	Unknown Protein (AHRD V1)													\N	\N	\N	\N	\N	\N	#N/A	#N/A	Solyc04g012150.2	0.00249888	2.22495	2.22495	ARF2sm-42G up vs wt-42G	0	0	0		0	0	0
Solyc04g040120.1	ARF2sm-42Gvswt-42G diff			ARF2sm-42G up vs wt-42G			ARF2sm-42G up vs wt-42G	Omega-6 fatty acid desaturase (AHRD V1 **** Q461Q1_HEVBR)%3B contains Interpro domain(s	at3g12120.2	| symbols: fad2 | fatty acid desaturase 2 | chr3:3860592-3861743 reverse length=383	Solyc04g040120.1.1	SL2.40ch04	31009542	31010669	tma0228	36.494	31657515	TGS2243	37.632	23699696	\N	\N	\N	\N	omega-3 fatty acid desaturase activity	GO:0042389	glycolipid desaturation	Omega-6 fatty acid desaturase	Solyc04g040120.1	0.000323545	2.85676	2.85676	ARF2sm-42G up vs wt-42G	0	0	0		0	0	0
Solyc04g054260.2	ARF2sm-42Gvswt-42G diff			ARF2sm-42G up vs wt-42G			ARF2sm-42G up vs wt-42G	Cytochrome P450 Cytochrome P450 Cytochrome P450 Cytochrome P450	at4g36220.1	| symbols: fah1 cyp84a1 | ferulic acid 5-hydroxylase 1 | chr4:17137584-17139619 revers	Solyc04g054260.2.1	SL2.40ch04	51369319	51371436	T725	40.054	51743622	TGS2803	41.812	51014124	\N	\N	\N	\N	ferulate 5-hydroxylase activity oxygen binding oxygen	GO:0046424 GO:0019825	NA	Cytochrome P450	Solyc04g054260.2	0.00218169	3.61721	3.61721	ARF2sm-42G up vs wt-42G	0	0	0		0	0	0
Solyc04g071070.2	ARF2sm-42Gvswt-42G diff			ARF2sm-42G up vs wt-42G			ARF2sm-42G up vs wt-42G	Unknown Protein (AHRD V1)%3B contains Interpro domain(s) IPR006706 Extensin-like regi	at1g21310.1	| symbols: atext3 rsh ext3 | extensin 3 | chr1:7453693-7454988 reverse length=431	Solyc04g071070.2.1	SL2.40ch04	55575932	55577439	T883	54.292	55663946	T819	54.524	55159363	plant-type cell wall organization	GO:0009664	\N	\N	\N	\N	#N/A	#N/A	Solyc04g071070.2	0.00297641	52.4052	52.4052	ARF2sm-42G up vs wt-42G	0	0	0		0	0	0
Solyc04g071090.2	ARF2sm-42Gvswt-42G diff			ARF2sm-42G up vs wt-42G			ARF2sm-42G up vs wt-42G	Unknown Protein (AHRD V1)	at1g21310.1	| symbols: atext3 rsh ext3 | extensin 3 | chr1:7453693-7454988 reverse length=431	Solyc04g071090.2.1	SL2.40ch04	55597501	55598202	T883	54.292	55663946	T819	54.524	55159363	\N	\N	\N	\N	\N	\N	#N/A	#N/A	Solyc04g071090.2	0.00127677	131.707	131.707	ARF2sm-42G up vs wt-42G	0	0	0		0	0	0
Solyc04g071780.2	ARF2sm-42Gvswt-42G diff			ARF2sm-42G up vs wt-42G			ARF2sm-42G up vs wt-42G	Cytochrome P450	at5g07990.1	| symbols: tt7 cyp75b1 d501 | cytochrome p450 superfamily protein | chr5:2560437-2562	Solyc04g071780.2.1	SL2.40ch04	56369822	56371569	T1050	58.33	56798702	CT178	58.064	56180202	\N	\N	\N	\N	oxygen binding	GO:0019825	NA	Cytochrome P450	Solyc04g071780.2	3.7562e-05	2.79802	2.79802	ARF2sm-42G up vs wt-42G	0	0	0		0	0	0
Solyc04g074700.2	ARF2sm-42Gvswt-42G diff			ARF2sm-42G up vs wt-42G			ARF2sm-42G up vs wt-42G	Homeobox-leucine zipper protein (AHRD V1 *-*- Q9FXN8_ZINEL)%3B contains Interpro domain	at2g22430.1	| symbols: athb6 hb6 | homeobox protein 6 | chr2:9526470-9527612 reverse length=311	Solyc04g074700.2.1	SL2.40ch04	58209625	58212759	TES0180	68.724	58432194	TES1180	65.089	58194050	regulation of transcription, DNA-dependent	GO:0006355	nucleus	GO:0005634	\N	\N	#N/A	#N/A	Solyc04g074700.2	0.000126875	4.10507	4.10507	ARF2sm-42G up vs wt-42G	0	0	0		0	0	0
Solyc04g076860.2	ARF2sm-42Gvswt-42G diff			ARF2sm-42G up vs wt-42G			ARF2sm-42G up vs wt-42G	Inter-alpha-trypsin inhibitor heavy chain H2 (AHRD V1 *--- ITIH2_HUMAN)%3B contains Int	at5g49665.1	| symbols: | zinc finger (c3hc4-type ring finger) family protein | chr5:20167119-201694	Solyc04g076860.2.1	SL2.40ch04	59382113	59384933	tma0100	77.583	59386713	TES1927	76.265	59278364	\N	\N	\N	\N	ubiquitin-protein ligase activity	GO:0004842	NA	ubiquitin-protein ligase	Solyc04g076860.2	0.00247343	2.7612	2.7612	ARF2sm-42G up vs wt-42G	0	0	0		0	0	0
Solyc04g077510.2	ARF2sm-42Gvswt-42G diff			ARF2sm-42G up vs wt-42G			ARF2sm-42G up vs wt-42G	Growth regulating factor 1 (Fragment) (AHRD V1 *--- A6MZS4_ORYSI)%3B contains Interpro	at2g22840.1	| symbols: atgrf1 grf1 | growth-regulating factor 1 | chr2:9728841-9731141 forward len	Solyc04g077510.2.1	SL2.40ch04	60063410	60066582	TES0098	84.183	60219232	T769	81.745	60040944	\N	\N	\N	\N	protein binding	GO:0005515	#N/A	#N/A	Solyc04g077510.2	0.00306014	6.92634	6.92634	ARF2sm-42G up vs wt-42G	0	0	0		0	0	0
Solyc04g077620.1	ARF2sm-42Gvswt-42G diff			ARF2sm-42G up vs wt-42G			ARF2sm-42G up vs wt-42G	Unknown Protein (AHRD V1)	at1g10140.1	| symbols: | uncharacterised conserved protein ucp031279 | chr1:3322970-3323473 reverse	Solyc04g077620.1.1	SL2.40ch04	60169868	60170242	TES0098	84.183	60219232	T769	81.745	60040944	\N	\N	\N	\N	\N	\N	#N/A	#N/A	Solyc04g077620.1	0.000837165	3.73982	3.73982	ARF2sm-42G up vs wt-42G	0	0	0		0	0	0
Solyc04g078900.2	ARF2sm-42Gvswt-42G diff			ARF2sm-42G up vs wt-42G			ARF2sm-42G up vs wt-42G	Cytochrome P450 Cytochrome P450	at3g19270.1	| symbols: cyp707a4 | cytochrome p450 family 707 subfamily a polypeptide 4 | chr3:66	Solyc04g078900.2.1	SL2.40ch04	61167800	61171187	TG443	95.421	61414081	TGS1157	90.883	61030085	\N	\N	\N	\N	(+)-abscisic acid 8'-hydroxylase activity oxygen binding	GO:0010295 GO:0019825	phaseic acid biosynthesis	abscisic acid 8'-hydroxylase	Solyc04g078900.2	0.00159059	3.20898	3.20898	ARF2sm-42G up vs wt-42G	0	0	0		0	0	0
Solyc04g079420.2	ARF2sm-42Gvswt-42G diff			ARF2sm-42G up vs wt-42G			ARF2sm-42G up vs wt-42G	Nbs-lrr%2C resistance protein	at4g33300.2	| symbols: adr1-l1 | adr1-like 1 | chr4:16051162-16054005 reverse length=816	Solyc04g079420.2.1	SL2.40ch04	61521424	61524959	T974	100.457	61683988	TG443	95.421	61414081	\N	\N	\N	\N	kinase activity	GO:0016301	#N/A	#N/A	Solyc04g079420.2	6.16934e-05	2.47352	2.47352	ARF2sm-42G up vs wt-42G	0	0	0		0	0	0
Solyc05g006860.2	ARF2sm-42Gvswt-42G diff			ARF2sm-42G up vs wt-42G			ARF2sm-42G up vs wt-42G	Thioredoxin H (AHRD V1 ***- Q4U0W0_NICAL)%3B contains Interpro domain(s) IPR015467 Th													cell redox homeostasis	GO:0045454	\N	\N	\N	\N	#N/A	#N/A	Solyc05g006860.2	0.00320788	2.02157	2.02157	ARF2sm-42G up vs wt-42G	0	0	0		0	0	0
Solyc05g012140.2	ARF2sm-42Gvswt-42G diff			ARF2sm-42G up vs wt-42G			ARF2sm-42G up vs wt-42G	Pentatricopeptide repeat-containing protein At2g30100%2C chloroplastic (AHRD V1 ***- PP	at2g30100.1	| symbols: | pentatricopeptide (ppr) repeat-containing protein | chr2:12847828-12849520	Solyc05g012140.2.1	SL2.40ch05	5349344	5352471	TG96	86.744	6016484	cLET-7-N9	69	5318482	\N	\N	\N	\N	\N	\N	#N/A	#N/A	Solyc05g012140.2	0.000303599	2.13661	2.13661	ARF2sm-42G up vs wt-42G	0	0	0		0	0	0
Solyc05g012210.2	ARF2sm-42Gvswt-42G diff			ARF2sm-42G up vs wt-42G			ARF2sm-42G up vs wt-42G	Ninja-family protein 1 (AHRD V1 *-*- NNJA1_WHEAT)%3B contains Interpro domain(s) IPR01	at3g29575.4	| symbols: afp3 | abi five binding protein 3 | chr3:11382416-11383657 reverse length=23	Solyc05g012210.2.1	SL2.40ch05	5491138	5495631	TG96	86.744	6016484	cLET-7-N9	69	5318482	\N	\N	\N	\N	\N	\N	#N/A	#N/A	Solyc05g012210.2	0.00158953	4.5834	4.5834	ARF2sm-42G up vs wt-42G	0	0	0		0	0	0
Solyc05g012890.1	ARF2sm-42Gvswt-42G diff			ARF2sm-42G up vs wt-42G			ARF2sm-42G up vs wt-42G	Cc-nbs-lrr%2C resistance protein with an R1 specific domain Cc-nbs-lrr%2C resistance pr	at1g50180.1	| symbols: | nb-arc domain-containing disease resistance protein | chr1:18584235-185871	Solyc05g012890.1.1	SL2.40ch05	6033094	6036868	TES0062	73.73	6225365	TG96	86.744	6016484	defense response apoptosis	GO:0006952 GO:0006915	\N	\N	\N	\N	#N/A	#N/A	Solyc05g012890.1	0.00105107	3.53977	3.53977	ARF2sm-42G up vs wt-42G	0	0	0		0	0	0
Solyc05g015480.2	ARF2sm-42Gvswt-42G diff			ARF2sm-42G up vs wt-42G			ARF2sm-42G up vs wt-42G	Cysteine desulfurase (AHRD V1 *-*- C1GS28_PARBA)	at5g51920.1	| symbols: | pyridoxal phosphate (plp)-dependent transferases superfamily protein | chr	Solyc05g015480.2.1	SL2.40ch05	10696907	10698635	T181	80.97	10763547	tma0107	81.32	10079264	\N	\N	\N	\N	\N	\N	alanine biosynthesis III	Cysteine desulfurase	Solyc05g015480.2	0.00071112	2.0566	2.0566	ARF2sm-42G up vs wt-42G	0	0	0		0	0	0
Solyc05g015850.2	ARF2sm-42Gvswt-42G diff			ARF2sm-42G up vs wt-42G			ARF2sm-42G up vs wt-42G	WRKY transcription factor-b (AHRD V1 **** Q5DJU0_CAPAN)%3B contains Interpro domain(s)	at5g13080.1	| symbols: wrky75 atwrky75 | wrky dna-binding protein 75 | chr5:4149928-4151019 revers	Solyc05g015850.2.1	SL2.40ch05	12420457	12423158	C2_At1g27980	80.949	12529181	TGS3190	81.405	11497816	\N	\N	\N	\N	protein binding sequence-specific DNA binding transcription factor activity	GO:0005515 GO:0003700	#N/A	#N/A	Solyc05g015850.2	0.00144671	4.95794	4.95794	ARF2sm-42G up vs wt-42G	0	0	0		0	0	0
Solyc05g041540.2	ARF2sm-42Gvswt-42G diff			ARF2sm-42G up vs wt-42G			ARF2sm-42G up vs wt-42G	Serine carboxypeptidase (AHRD V1 ***- Q9XH61_9ASTR)%3B contains Interpro domain(s) IPR	at3g45010.1	| symbols: scpl48 | serine carboxypeptidase-like 48 | chr3:16466328-16468845 forward le	Solyc05g041540.2.1	SL2.40ch05	51253195	51263703	TGS3107	82.355	51482192	TGS0504	81.405	51037179	\N	\N	\N	\N	identical protein binding	GO:0042802	#N/A	#N/A	Solyc05g041540.2	0.000137718	4.27624	4.27624	ARF2sm-42G up vs wt-42G	0	0	0		0	0	0
Solyc05g052280.2	ARF2sm-42Gvswt-42G diff			ARF2sm-42G up vs wt-42G			ARF2sm-42G up vs wt-42G	Peroxidase (AHRD V1 ***- B9VRK9_CAPAN)%3B contains Interpro domain(s) IPR002016 Haem	at5g05340.1	| symbols: | peroxidase superfamily protein | chr5:1579142-1580819 reverse length=324	Solyc05g052280.2.1	SL2.40ch05	61706113	61709182	CT172	107.488	62108681	U221402	94.17	61671367	\N	\N	\N	\N	protein binding	GO:0005515	betanidin degradation	Peroxidase	Solyc05g052280.2	0.00126837	7.1296	7.1296	ARF2sm-42G up vs wt-42G	0	0	0		0	0	0
Solyc05g052680.1	ARF2sm-42Gvswt-42G diff			ARF2sm-42G up vs wt-42G			ARF2sm-42G up vs wt-42G	Hydroxycinnamoyl transferase (AHRD V1 **-* D2XJ64_9MAGN)%3B contains Interpro domain(s)	at2g39980.1	| symbols: | hxxxd-type acyl-transferase family protein | chr2:16688437-16689885 revers	Solyc05g052680.1.1	SL2.40ch05	62040079	62041452	CT172	107.488	62108681	T1746	97.215	61708360	\N	\N	\N	\N	transferase activity	GO:0016740	#N/A	#N/A	Solyc05g052680.1	0.00117002	19.2489	19.2489	ARF2sm-42G up vs wt-42G	0	0	0		0	0	0
Solyc05g053610.2	ARF2sm-42Gvswt-42G diff			ARF2sm-42G up vs wt-42G			ARF2sm-42G up vs wt-42G	ATP-binding cassette transporter (AHRD V1 ***- D8RL93_SELML)%3B contains Interpro domai	at1g15520.1	| symbols: pdr12 atpdr12 abcg40 atabcg40 | pleiotropic drug resistance 12 | chr1:533	Solyc05g053610.2.1	SL2.40ch05	62822197	62829504	TES1838	119.266	62867839	C2_At5g49510	114.67	62638676	\N	\N	\N	\N	ATPase activity, coupled to transmembrane movement of substances	GO:0042626	#N/A	#N/A	Solyc05g053610.2	0.000822001	2.68571	2.68571	ARF2sm-42G up vs wt-42G	0	0	0		0	0	0
Solyc05g053620.2	ARF2sm-42Gvswt-42G diff			ARF2sm-42G up vs wt-42G			ARF2sm-42G up vs wt-42G	F-box protein PP2-B1 (AHRD V1 **-- PP2B1_ARATH)	at5g24560.1	| symbols: atpp2-b12 pp2-b12 | phloem protein 2-b12 | chr5:8402205-8403266 forward len	Solyc05g053620.2.1	SL2.40ch05	62839788	62841148	TES1838	119.266	62867839	C2_At5g49510	114.67	62638676	\N	\N	\N	\N	carbohydrate binding	GO:0030246	#N/A	#N/A	Solyc05g053620.2	0.000255771	3.31169	3.31169	ARF2sm-42G up vs wt-42G	0	0	0		0	0	0
Solyc05g054560.2	ARF2sm-42Gvswt-42G diff			ARF2sm-42G up vs wt-42G			ARF2sm-42G up vs wt-42G	UPF0497 membrane protein 2 (AHRD V1 ***- U4972_POPTR)%3B contains Interpro domain(s) I	at3g55390.1	| symbols: | uncharacterised protein family (upf0497) | chr3:20534785-20535620 forward	Solyc05g054560.2.1	SL2.40ch05	63599769	63601868	TES0099	125.752	63667711	T1584	124.259	63554332	\N	\N	\N	\N	\N	\N	#N/A	#N/A	Solyc05g054560.2	8.76374e-05	2.09092	2.09092	ARF2sm-42G up vs wt-42G	0	0	0		0	0	0
Solyc05g056500.1	ARF2sm-42Gvswt-42G diff			ARF2sm-42G up vs wt-42G			ARF2sm-42G up vs wt-42G	U-box domain-containing protein (AHRD V1 ***- D7KF20_ARALY)%3B contains Interpro domain	at1g49780.1	| symbols: pub26 | plant u-box 26 | chr1:18429024-18430289 reverse length=421	Solyc05g056500.1.1	SL2.40ch05	64916177	64917382	\NA	\NA	\NA	T633	137.915	64597812	\N	\N	\N	\N	ubiquitin-protein ligase activity	GO:0004842	NA	ubiquitin-protein ligase	Solyc05g056500.1	0.00143473	2.90406	2.90406	ARF2sm-42G up vs wt-42G	0	0	0		0	0	0
Solyc06g009290.2	ARF2sm-42Gvswt-42G diff			ARF2sm-42G up vs wt-42G			ARF2sm-42G up vs wt-42G	Lipid A export ATP-binding/permease protein msbA (AHRD V1 *--- MSBA_SYNAS)%3B contains	at3g62150.1	| symbols: pgp21 | p-glycoprotein 21 | chr3:23008755-23013579 reverse length=1296 | sym	Solyc06g009290.2.1	SL2.40ch06	3249411	3257702	TGS0230	12.76	3804331	TES1873	9.989	3222328	\N	\N	\N	\N	xenobiotic-transporting ATPase activity auxin efflux transmembrane transporter activity	GO:0008559 GO:0010329	NA	xenobiotic-transporting ATPase	Solyc06g009290.2	0.00026289	2.48957	2.48957	ARF2sm-42G up vs wt-42G	0	0	0		0	0	0
Solyc06g018090.1	ARF2sm-42Gvswt-42G diff			ARF2sm-42G up vs wt-42G			ARF2sm-42G up vs wt-42G	FMRFamide-related peptides type HF-4 (AHRD V1 ***- FAR1_HELAS)	none	none	Solyc06g018090.1.1	SL2.40ch06	13247162	13247536	tmc0068	6.355	14314223	TGS2102	10.35	11104964	\N	\N	\N	\N	\N	\N	#N/A	#N/A	Solyc06g018090.1	0.00253189	3.64908	3.64908	ARF2sm-42G up vs wt-42G	0	0	0		0	0	0
Solyc06g050440.2	ARF2sm-42Gvswt-42G diff			ARF2sm-42G up vs wt-42G			ARF2sm-42G up vs wt-42G	Peroxidase (AHRD V1 ***- Q9XIV9_TOBAC)%3B contains Interpro domain(s) IPR002016 Haem	at5g05340.1	| symbols: | peroxidase superfamily protein | chr5:1579142-1580819 reverse length=324	Solyc06g050440.2.1	SL2.40ch06	29541578	29543891	tma0261	20.19	29619718	TES0312	17.733	28841883	\N	\N	\N	\N	protein binding	GO:0005515	betanidin degradation	Peroxidase	Solyc06g050440.2	0.00113688	8.34754	8.34754	ARF2sm-42G up vs wt-42G	0	0	0		0	0	0
Solyc06g051520.2	ARF2sm-42Gvswt-42G diff			ARF2sm-42G up vs wt-42G			ARF2sm-42G up vs wt-42G	Mitochondrial import inner membrane translocase subunit TIM50 (AHRD V1 *--- TIM50_YEAST	at3g55960.1	| symbols: | haloacid dehalogenase-like hydrolase (had) superfamily protein | chr3:2076	Solyc06g051520.2.1	SL2.40ch06	31482740	31498569	T693	31.776	32073375	TG590	28.001	31166234	\N	\N	\N	\N	phosphatase activity	GO:0016791	#N/A	#N/A	Solyc06g051520.2	0.000204417	2.02293	2.02293	ARF2sm-42G up vs wt-42G	0	0	0		0	0	0
Solyc06g059860.2	ARF2sm-42Gvswt-42G diff			ARF2sm-42G up vs wt-42G			ARF2sm-42G up vs wt-42G	Unknown Protein (AHRD V1)	at1g76980.2	| symbols: | functions in: molecular_function unknown involved in: biological_process	Solyc06g059860.2.1	SL2.40ch06	34148058	34150076	TES1190	41.524	34254316	TEI0147	41.16	33997588	\N	\N	\N	\N	\N	\N	#N/A	#N/A	Solyc06g059860.2	0.000249077	3.17848	3.17848	ARF2sm-42G up vs wt-42G	0	0	0		0	0	0
Solyc06g065570.2	ARF2sm-42Gvswt-42G diff			ARF2sm-42G up vs wt-42G			ARF2sm-42G up vs wt-42G	N-acetyltransferase (AHRD V1 ***- Q1HQ22_BOMMO)%3B contains Interpro domain(s) IPR0001	at5g11340.1	| symbols: | acyl-coa n-acyltransferases (nat) superfamily protein | chr5:3619226-36210	Solyc06g065570.2.1	SL2.40ch06	37352391	37356280	TES0292	45.716	37756511	TES0355	48.258	37267943	\N	\N	\N	\N	protein binding	GO:0005515	#N/A	#N/A	Solyc06g065570.2	0.000401154	2.01519	2.01519	ARF2sm-42G up vs wt-42G	0	0	0		0	0	0
Solyc06g066010.2	ARF2sm-42Gvswt-42G diff			ARF2sm-42G up vs wt-42G			ARF2sm-42G up vs wt-42G	U11/U12 small nuclear ribonucleoprotein protein (AHRD V1 *-*- C1C3V0_RANCA)%3B contains	at4g32270.1	| symbols: | ubiquitin-like superfamily protein | chr4:15575015-15576360 reverse length	Solyc06g066010.2.1	SL2.40ch06	37754411	37757648	TGS0892	51.259	37789229	TES0355	48.258	37267943	\N	\N	\N	\N	\N	\N	#N/A	#N/A	Solyc06g066010.2	0.00271871	2.99111	2.99111	ARF2sm-42G up vs wt-42G	0	0	0		0	0	0
Solyc07g007400.2	ARF2sm-42Gvswt-42G diff			ARF2sm-42G up vs wt-42G			ARF2sm-42G up vs wt-42G	Leucine-rich repeat-like protein (AHRD V1 **-- Q6K620_ORYSJ)	at1g15740.1	| symbols: | leucine-rich repeat family protein | chr1:5411509-5414544 forward length=5	Solyc07g007400.2.1	SL2.40ch07	2130546	2133345	TES1816	1.925	2234820	TGS2602	2.081	2129576	\N	\N	\N	\N	\N	\N	#N/A	#N/A	Solyc07g007400.2	0.00195652	3.12601	3.12601	ARF2sm-42G up vs wt-42G	0	0	0		0	0	0
Solyc07g009530.1	ARF2sm-42Gvswt-42G diff			ARF2sm-42G up vs wt-42G			ARF2sm-42G up vs wt-42G	Chitinase (AHRD V1 ***- Q8MD06_LEUGL)%3B contains Interpro domain(s) IPR001002 Chitin	at3g12500.1	| symbols: athchib pr3 pr-3 chi-b b-chi hchib | basic chitinase | chr3:3962501-396	Solyc07g009530.1.1	SL2.40ch07	4681799	4681990	tma0054	28.939	5621490	T1328	17.336	4159281	cell wall macromolecule catabolic process	GO:0016998	\N	\N	chitin binding	GO:0008061	NA	Chitinase	Solyc07g009530.1	0.000264031	20.7449	20.7449	ARF2sm-42G up vs wt-42G	0	0	0		0	0	0
Solyc07g032740.2	ARF2sm-42Gvswt-42G diff			ARF2sm-42G up vs wt-42G			ARF2sm-42G up vs wt-42G	Aspartate aminotransferase (AHRD V1 **** A9PHH1_POPTR)%3B contains Interpro domain(s)	at5g19550.1	| symbols: asp2 aat2 | aspartate aminotransferase 2 | chr5:6598201-6601597 forward len	Solyc07g032740.2.1	SL2.40ch07	40596737	40601885	TGS0844	29.102	42511526	TGS2276	27.061	39980910	\N	\N	\N	\N	L-aspartate:2-oxoglutarate aminotransferase activity L-aspartate:2-oxoglutarate aminotr	GO:0004069 GO:0004069	aspartate degradation II	aspartate transaminase	Solyc07g032740.2	9.12637e-05	2.07487	2.07487	ARF2sm-42G up vs wt-42G	0	0	0		0	0	0
Solyc07g041660.2	ARF2sm-42Gvswt-42G diff			ARF2sm-42G up vs wt-42G			ARF2sm-42G up vs wt-42G	DENN domain containing protein expressed (AHRD V1 *-*- Q10RU8_ORYSJ)%3B contains Interp	at5g35560.1	| symbols: | denn (aex-3) domain-containing protein | chr5:13742458-13747464 reverse le	Solyc07g041660.2.1	SL2.40ch07	51165537	51176923	tma0139	26.393	51995506	TGS1411	27.336	51145172	\N	\N	\N	\N	\N	\N	#N/A	#N/A	Solyc07g041660.2	8.0651e-05	2.20608	2.20608	ARF2sm-42G up vs wt-42G	0	0	0		0	0	0
Solyc07g041940.2	ARF2sm-42Gvswt-42G diff			ARF2sm-42G up vs wt-42G			ARF2sm-42G up vs wt-42G	ATP binding / serine-threonine kinase (AHRD V1 **** C5DB71_VITVI)%3B contains Interpro	at2g05940.1	| symbols: | protein kinase superfamily protein | chr2:2287514-2289270 reverse length=4	Solyc07g041940.2.1	SL2.40ch07	51996488	51998745	TES1075	26.31	52508740	tma0139	26.393	51995506	\N	\N	\N	\N	protein serine/threonine kinase activity protein binding	GO:0004674 GO:0005515	NA	Serine/threonine-protein kinase At5g01020	Solyc07g041940.2	0.00313912	2.17109	2.17109	ARF2sm-42G up vs wt-42G	0	0	0		0	0	0
Solyc07g043310.2	ARF2sm-42Gvswt-42G diff			ARF2sm-42G up vs wt-42G			ARF2sm-42G up vs wt-42G	Aminotransferase (AHRD V1 ***- D2KZ08_WHEAT)%3B contains Interpro domain(s) IPR005814	at3g22200.1	| symbols: pop2 gaba-t her1 | pyridoxal phosphate (plp)-dependent transferases superf	Solyc07g043310.2.1	SL2.40ch07	54313638	54320300	TG329	34.59	54337695	TGS1487	35.005	54208242	\N	\N	\N	\N	pyridoxal phosphate binding	GO:0030170	4-aminobutyrate degradation I	gamma-aminobutyrate transaminase subunit precursor isozyme 1	Solyc07g043310.2	5.86568e-05	2.26009	2.26009	ARF2sm-42G up vs wt-42G	0	0	0		0	0	0
Solyc07g048040.1	ARF2sm-42Gvswt-42G diff			ARF2sm-42G up vs wt-42G			ARF2sm-42G up vs wt-42G	C2 domain-containing protein (AHRD V1 ***- D7MKI6_ARALY)%3B contains Interpro domain(s)	at5g55530.2	| symbols: | calcium-dependent lipid-binding (calb domain) family protein | chr5:224944	Solyc07g048040.1.1	SL2.40ch07	56554258	56555475	tma0137	41.628	56740212	TES1755	42.596	56398634	\N	\N	\N	\N	\N	\N	#N/A	#N/A	Solyc07g048040.1	0.000176003	2.09122	2.09122	ARF2sm-42G up vs wt-42G	0	0	0		0	0	0
Solyc07g055490.2	ARF2sm-42Gvswt-42G diff			ARF2sm-42G up vs wt-42G			ARF2sm-42G up vs wt-42G	Cytochrome P450	at3g14690.1	| symbols: cyp72a15 | cytochrome p450 family 72 subfamily a polypeptide 15 | chr3:49	Solyc07g055490.2.1	SL2.40ch07	60827819	60830145	TGS0412	53.716	61372245	TES1057	47.747	60727202	\N	\N	\N	\N	oxygen binding	GO:0019825	NA	Cytochrome P450	Solyc07g055490.2	2.16447e-05	2.49668	2.49668	ARF2sm-42G up vs wt-42G	0	0	0		0	0	0
Solyc07g056500.2	ARF2sm-42Gvswt-42G diff			ARF2sm-42G up vs wt-42G			ARF2sm-42G up vs wt-42G	Glutathione transferase (AHRD V1 **** O49821_CARPA)%3B contains Interpro domain(s) IPR	at1g78380.1	| symbols: atgstu19 gst8 gstu19 | glutathione s-transferase tau 19 | chr1:29486659-29	Solyc07g056500.2.1	SL2.40ch07	61628566	61630043	TES0263	57.375	62014746	TEI0655	55.211	61451735	\N	\N	\N	\N	glutathione transferase activity	GO:0004364	glutathione-mediated detoxification	putative glutathione S-transferase T5	Solyc07g056500.2	0.000893283	2.15343	2.15343	ARF2sm-42G up vs wt-42G	0	0	0		0	0	0
Solyc07g066020.2	ARF2sm-42Gvswt-42G diff			ARF2sm-42G up vs wt-42G			ARF2sm-42G up vs wt-42G	Amino acid permease (AHRD V1 **** B9N5L8_POPTR)%3B contains Interpro domain(s) IPR0130	at5g23810.1	| symbols: aap7 | amino acid permease 7 | chr5:8028461-8030730 forward length=467	Solyc07g066020.2.1	SL2.40ch07	64780649	64784955	TES0549	93.308	64899925	T848	89.654	64567498	\N	\N	\N	\N	amino acid transmembrane transporter activity	GO:0015171	#N/A	#N/A	Solyc07g066020.2	0.000556996	2.9535	2.9535	ARF2sm-42G up vs wt-42G	0	0	0		0	0	0
Solyc07g066180.2	ARF2sm-42Gvswt-42G diff			ARF2sm-42G up vs wt-42G			ARF2sm-42G up vs wt-42G	ATP/GTP-binding protein (AHRD V1 *--- A8L7D9_FRASN)%3B contains Interpro domain(s) IPR	at5g56220.1	| symbols: | p-loop containing nucleoside triphosphate hydrolases superfamily protein |	Solyc07g066180.2.1	SL2.40ch07	64884958	64887425	TES0549	93.308	64899925	T848	89.654	64567498	\N	\N	\N	\N	nucleoside-triphosphatase activity	GO:0017111	NA	nucleoside-triphosphatase	Solyc07g066180.2	0.000790499	8.88958	8.88958	ARF2sm-42G up vs wt-42G	0	0	0		0	0	0
Solyc07g066330.2	ARF2sm-42Gvswt-42G diff			ARF2sm-42G up vs wt-42G			ARF2sm-42G up vs wt-42G	NAC domain protein IPR003441 (AHRD V1 ***- B9HH13_POPTR)%3B contains Interpro domain(s)	at1g56010.2	| symbols: nac1 anac022 | nac domain containing protein 1 | chr1:20946852-20949144 rev	Solyc07g066330.2.1	SL2.40ch07	65019493	65024400	TGS2259	97.332	65047162	TES1718	93.936	64988006	\N	\N	\N	\N	sequence-specific DNA binding transcription factor activity	GO:0003700	#N/A	#N/A	Solyc07g066330.2	0.000115462	24.1546	24.1546	ARF2sm-42G up vs wt-42G	0	0	0		0	0	0
Solyc08g006460.2	ARF2sm-42Gvswt-42G diff			ARF2sm-42G up vs wt-42G			ARF2sm-42G up vs wt-42G	RING-finger protein like (AHRD V1 *-*- B6SVN2_MAIZE)%3B contains Interpro domain(s) IP	at5g10650.2	| symbols: | ring/u-box superfamily protein | chr5:3365237-3367263 reverse length=525	Solyc08g006460.2.1	SL2.40ch08	1062022	1065021	tme0016	2.621	1112253	T1123	2.777	1037631	\N	\N	\N	\N	zinc ion binding	GO:0008270	#N/A	#N/A	Solyc08g006460.2	0.0017532	2.25116	2.25116	ARF2sm-42G up vs wt-42G	0	0	0		0	0	0
Solyc08g006470.2	ARF2sm-42Gvswt-42G diff			ARF2sm-42G up vs wt-42G			ARF2sm-42G up vs wt-42G	Zinc finger family protein (AHRD V1 ***- D7MB67_ARALY)%3B contains Interpro domain(s)													\N	\N	\N	\N	protein binding sequence-specific DNA binding transcription factor activity	GO:0005515 GO:0003700	#N/A	#N/A	Solyc08g006470.2	0.00109927	4.02298	4.02298	ARF2sm-42G up vs wt-42G	0	0	0		0	0	0
Solyc08g061880.1	ARF2sm-42Gvswt-42G diff			ARF2sm-42G up vs wt-42G			ARF2sm-42G up vs wt-42G	Peroxisome biogenesis factor 10 (AHRD V1 ***- B9U2H6_TOBAC)	at2g26350.1	| symbols: pex10 atpex10 | peroxin 10 | chr2:11217767-11220415 reverse length=381	Solyc08g061880.1.1	SL2.40ch08	46852224	46853324	TES0990	25.382	47402342	TG45	26.234	46484719	\N	\N	\N	\N	\N	\N	#N/A	#N/A	Solyc08g061880.1	2.3789e-05	2.23387	2.23387	ARF2sm-42G up vs wt-42G	0	0	0		0	0	0
Solyc08g061890.2	ARF2sm-42Gvswt-42G diff			ARF2sm-42G up vs wt-42G			ARF2sm-42G up vs wt-42G	Retinoblastoma binding protein 6 (AHRD V1 *--- Q866R2_HORSE)%3B contains Interpro domai	at5g47430.3	| symbols: | dwnn domain a cchc-type zinc finger | chr5:19235819-19240596 reverse leng	Solyc08g061890.2.1	SL2.40ch08	46859866	46866346	TES0990	25.382	47402342	TG45	26.234	46484719	\N	\N	ubiquitin ligase complex nucleus	GO:0000151 GO:0005634	zinc ion binding	GO:0008270	#N/A	#N/A	Solyc08g061890.2	0.00282788	2.02107	2.02107	ARF2sm-42G up vs wt-42G	0	0	0		0	0	0
Solyc08g067610.2	ARF2sm-42Gvswt-42G diff			ARF2sm-42G up vs wt-42G			ARF2sm-42G up vs wt-42G	ATP-binding cassette transporter (AHRD V1 ***- D8RL77_SELML)%3B contains Interpro domai	at1g15520.1	| symbols: pdr12 atpdr12 abcg40 atabcg40 | pleiotropic drug resistance 12 | chr1:533	Solyc08g067610.2.1	SL2.40ch08	53826067	53832536	TG349	39.985	54002455	TES0923	39.116	53632277	\N	\N	\N	\N	xenobiotic-transporting ATPase activity	GO:0008559	NA	xenobiotic-transporting ATPase	Solyc08g067610.2	0.00259741	2.96408	2.96408	ARF2sm-42G up vs wt-42G	0	0	0		0	0	0
Solyc08g076880.2	ARF2sm-42Gvswt-42G diff			ARF2sm-42G up vs wt-42G			ARF2sm-42G up vs wt-42G	Unknown Protein (AHRD V1)	none	none	Solyc08g076880.2.1	SL2.40ch08	57977177	57978199	TES1884	63.863	58178316	TES0232	63.616	57897345	\N	\N	\N	\N	\N	\N	#N/A	#N/A	Solyc08g076880.2	0.000632952	2.35749	2.35749	ARF2sm-42G up vs wt-42G	0	0	0		0	0	0
Solyc08g076970.2	ARF2sm-42Gvswt-42G diff			ARF2sm-42G up vs wt-42G			ARF2sm-42G up vs wt-42G	Acetylornithine deacetylase or succinyl-diaminopimelate desuccinylase (AHRD V1 **-- D4M	at4g17830.1	| symbols: | peptidase m20/m25/m40 family protein | chr4:9915916-9918049 forward length	Solyc08g076970.2.1	SL2.40ch08	58078222	58080829	TES1884	63.863	58178316	TES0232	63.616	57897345	metabolic process	GO:0008152	\N	\N	hydrolase activity	GO:0016787	arginine biosynthesis III	Peptidase M20/M25/M40 family protein	Solyc08g076970.2	0.00259549	5.69662	5.69662	ARF2sm-42G up vs wt-42G	0	0	0		0	0	0
Solyc08g077780.2	ARF2sm-42Gvswt-42G diff			ARF2sm-42G up vs wt-42G			ARF2sm-42G up vs wt-42G	Serine/threonine protein kinase (AHRD V1 **** Q0PL87_CAMSI)%3B contains Interpro domain	at4g33950.1	| symbols: ost1 snrk2-6 srk2e snrk2.6 p44 atost1 | protein kinase superfamily prot	Solyc08g077780.2.1	SL2.40ch08	58856672	58862420	TES0741	71.514	58870247	TES0747	62.245	58711111	\N	\N	\N	\N	AMP-activated protein kinase activity	GO:0004679	NA	serine/threonine protein kinase	Solyc08g077780.2	0.00121897	2.50049	2.50049	ARF2sm-42G up vs wt-42G	0	0	0		0	0	0
Solyc08g079420.2	ARF2sm-42Gvswt-42G diff			ARF2sm-42G up vs wt-42G			ARF2sm-42G up vs wt-42G	Cytochrome P450 Cytochrome P450	at4g12320.1	| symbols: cyp706a6 | cytochrome p450 family 706 subfamily a polypeptide 6 | chr4:73	Solyc08g079420.2.1	SL2.40ch08	60118494	60120898	TES1903	82.267	60403996	TGS2002	81.496	60047197	\N	\N	\N	\N	oxygen binding	GO:0019825	NA	Cytochrome P450	Solyc08g079420.2	0.0032397	8.00858	8.00858	ARF2sm-42G up vs wt-42G	0	0	0		0	0	0
Solyc08g079900.1	ARF2sm-42Gvswt-42G diff			ARF2sm-42G up vs wt-42G			ARF2sm-42G up vs wt-42G	Subtilisin-like protease (AHRD V1 **-- Q9LWA4_SOLLC)%3B contains Interpro domain(s) IP	at5g67360.1	| symbols: ara12 | subtilase family protein | chr5:26872192-26874465 reverse length=757	Solyc08g079900.1.1	SL2.40ch08	60493717	60495963	tme0100	84.782	60616460	CT148	85.264	60443420	\N	\N	\N	\N	serine-type endopeptidase activity	GO:0004252	#N/A	#N/A	Solyc08g079900.1	0.00047349	13.0026	13.0026	ARF2sm-42G up vs wt-42G	0	0	0		0	0	0
Solyc08g081400.2	ARF2sm-42Gvswt-42G diff			ARF2sm-42G up vs wt-42G			ARF2sm-42G up vs wt-42G	BEL1-like homeodomain protein 2 (AHRD V1 *--- BLH2_ARATH)%3B contains Interpro domain(s	at5g41410.1	| symbols: bel1 | pox (plant homeobox) family protein | chr5:16580424-16583770 forward	Solyc08g081400.2.1	SL2.40ch08	61634552	61638185	TGS3110	98.477	61773781	TES0297	96.632	61586877	\N	\N	\N	\N	DNA binding protein binding	GO:0003677 GO:0005515	#N/A	#N/A	Solyc08g081400.2	0.0018773	2.07438	2.07438	ARF2sm-42G up vs wt-42G	0	0	0		0	0	0
Solyc08g083130.2	ARF2sm-42Gvswt-42G diff			ARF2sm-42G up vs wt-42G			ARF2sm-42G up vs wt-42G	Homeobox leucine zipper protein (AHRD V1 *-*- B8YIB0_MIRJA)%3B contains Interpro domain	at2g46680.1	| symbols: athb-7 athb7 hb-7 | homeobox 7 | chr2:19165777-19166773 reverse length=258	Solyc08g083130.2.1	SL2.40ch08	62843229	62844188	CT68	109.243	62924142	TES0481	106.778	62702057	\N	\N	\N	\N	sequence-specific DNA binding	GO:0043565	#N/A	#N/A	Solyc08g083130.2	0.0022618	4.57805	4.57805	ARF2sm-42G up vs wt-42G	0	0	0		0	0	0
Solyc09g009520.2	ARF2sm-42Gvswt-42G diff			ARF2sm-42G up vs wt-42G			ARF2sm-42G up vs wt-42G	Hydrolase alpha/beta fold family protein (AHRD V1 **** D7LIQ3_ARALY)%3B contains Interp	at2g36290.1	| symbols: | alpha/beta-hydrolases superfamily protein | chr2:15208867-15210768 reverse	Solyc09g009520.2.1	SL2.40ch09	2929991	2932883	TES1059	31.723	3092277	cLET-7-O3	29.925	2644130	\N	\N	\N	\N	hydrolase activity	GO:0016787	#N/A	#N/A	Solyc09g009520.2	0.00237969	2.43871	2.43871	ARF2sm-42G up vs wt-42G	0	0	0		0	0	0
Solyc09g011520.2	ARF2sm-42Gvswt-42G diff			ARF2sm-42G up vs wt-42G			ARF2sm-42G up vs wt-42G	Glutathione S-transferase-like protein (AHRD V1 **** A8DUB0_SOLLC)%3B contains Interpro	at3g09270.1	| symbols: atgstu8 gstu8 | glutathione s-transferase tau 8 | chr3:2848407-2849226 reve	Solyc09g011520.2.1	SL2.40ch09	4826832	4827949	T1212	49.146	5090709	TES1143	45.457	4642979	\N	\N	\N	\N	glutathione transferase activity	GO:0004364	glutathione-mediated detoxification	glutathione S-transferase TAU 8	Solyc09g011520.2	0.00250468	4.66409	4.66409	ARF2sm-42G up vs wt-42G	0	0	0		0	0	0
Solyc09g011550.2	ARF2sm-42Gvswt-42G diff			ARF2sm-42G up vs wt-42G			ARF2sm-42G up vs wt-42G	Glutathione S-transferase-like protein (AHRD V1 **** A8DUB0_SOLLC)%3B contains Interpro	at3g09270.1	| symbols: atgstu8 gstu8 | glutathione s-transferase tau 8 | chr3:2848407-2849226 reve	Solyc09g011550.2.1	SL2.40ch09	4837594	4838668	T1212	49.146	5090709	TES1143	45.457	4642979	\N	\N	\N	\N	glutathione transferase activity	GO:0004364	glutathione-mediated detoxification	glutathione S-transferase TAU 8	Solyc09g011550.2	0.000553882	2.55973	2.55973	ARF2sm-42G up vs wt-42G	0	0	0		0	0	0
Solyc09g011590.2	ARF2sm-42Gvswt-42G diff			ARF2sm-42G up vs wt-42G			ARF2sm-42G up vs wt-42G	Glutathione S-transferase-like protein (AHRD V1 **** A8DUB0_SOLLC)%3B contains Interpro	at3g09270.1	| symbols: atgstu8 gstu8 | glutathione s-transferase tau 8 | chr3:2848407-2849226 reve	Solyc09g011590.2.1	SL2.40ch09	4866182	4867736	T1212	49.146	5090709	TES1143	45.457	4642979	\N	\N	\N	\N	glutathione transferase activity	GO:0004364	glutathione-mediated detoxification	glutathione S-transferase TAU 8	Solyc09g011590.2	0.00246379	2.09109	2.09109	ARF2sm-42G up vs wt-42G	0	0	0		0	0	0
Solyc09g014430.1	ARF2sm-42Gvswt-42G diff			ARF2sm-42G up vs wt-42G			ARF2sm-42G up vs wt-42G	Unknown Protein (AHRD V1)	none	none	Solyc09g014430.1.1	SL2.40ch09	6049356	6049562	cLET-2-D4	53.831	6097566	TGS1315	37.381	5341515	\N	\N	\N	\N	\N	\N	#N/A	#N/A	Solyc09g014430.1	0.00277875	2.12219	2.12219	ARF2sm-42G up vs wt-42G	0	0	0		0	0	0
Solyc09g074210.2	ARF2sm-42Gvswt-42G diff			ARF2sm-42G up vs wt-42G			ARF2sm-42G up vs wt-42G	Endonuclease/exonuclease/phosphatase family protein (AHRD V1 ***- D7LHF0_ARALY)%3B cont	at2g48030.1	| symbols: | dnase i-like superfamily protein | chr2:19647834-19649988 reverse length=4	Solyc09g074210.2.1	SL2.40ch09	61493939	61496946	TEI0742	57.971	61556437	T182	55.517	61158035	\N	\N	\N	\N	\N	\N	#N/A	#N/A	Solyc09g074210.2	0.000251959	3.07094	3.07094	ARF2sm-42G up vs wt-42G	0	0	0		0	0	0
Solyc09g090430.2	ARF2sm-42Gvswt-42G diff			ARF2sm-42G up vs wt-42G			ARF2sm-42G up vs wt-42G	Cyanate hydratase (AHRD V1 ***- B6TTW1_MAIZE)%3B contains Interpro domain(s) IPR008076	at3g23490.1	| symbols: cyn | cyanase | chr3:8423238-8424415 reverse length=168 | symbols: cyn | cya	Solyc09g090430.2.1	SL2.40ch09	65298327	65302769	TES1028	83.733	65382563	tme0004	82.945	65211593	cyanate metabolic process metabolic process	GO:0009439 GO:0008152	\N	\N	DNA binding	GO:0003677	cyanate degradation	cyanase	Solyc09g090430.2	0.000587917	2.06774	2.06774	ARF2sm-42G up vs wt-42G	0	0	0		0	0	0
Solyc09g091000.2	ARF2sm-42Gvswt-42G diff			ARF2sm-42G up vs wt-42G			ARF2sm-42G up vs wt-42G	Major allergen Mal d 1 (AHRD V1 ***- Q84LA7_MALDO)%3B contains Interpro domain(s) IPR0	at1g24020.2	| symbols: mlp423 | mlp-like protein 423 | chr1:8500653-8501458 reverse length=155 | sy	Solyc09g091000.2.1	SL2.40ch09	65708207	65709306	TES0562	92.726	65871729	TG424	83.701	65429631	response to biotic stimulus	GO:0009607	\N	\N	\N	\N	#N/A	#N/A	Solyc09g091000.2	0.00140329	48.7164	48.7164	ARF2sm-42G up vs wt-42G	0	0	0		0	0	0
Solyc09g091670.2	ARF2sm-42Gvswt-42G diff			ARF2sm-42G up vs wt-42G			ARF2sm-42G up vs wt-42G	ATP-binding cassette transporter (AHRD V1 ***- D8RL77_SELML)%3B contains Interpro domai	at1g15520.1	| symbols: pdr12 atpdr12 abcg40 atabcg40 | pleiotropic drug resistance 12 | chr1:533	Solyc09g091670.2.1	SL2.40ch09	66270226	66277538	tme0072	97.572	66371766	TEI0161	95.488	66093093	\N	\N	\N	\N	ATPase activity, coupled to transmembrane movement of substances	GO:0042626	#N/A	#N/A	Solyc09g091670.2	0.00187475	11.5374	11.5374	ARF2sm-42G up vs wt-42G	0	0	0		0	0	0
Solyc09g091990.2	ARF2sm-42Gvswt-42G diff			ARF2sm-42G up vs wt-42G			ARF2sm-42G up vs wt-42G	Receptor-like kinase (AHRD V1 *-*- A7VM32_MARPO)%3B contains Interpro domain(s) IPR002	at2g32800.1	| symbols: ap4.3a | protein kinase family protein | chr2:13916478-13919033 forward leng	Solyc09g091990.2.1	SL2.40ch09	66532632	66534277	TES0544	99.088	66560400	TES0889	99.088	66513258	protein phosphorylation	GO:0006468	\N	\N	\N	\N	NA	protein kinase family protein	Solyc09g091990.2	0.00124892	2.97125	2.97125	ARF2sm-42G up vs wt-42G	0	0	0		0	0	0
Solyc09g092420.1	ARF2sm-42Gvswt-42G diff			ARF2sm-42G up vs wt-42G			ARF2sm-42G up vs wt-42G	Amino acid permease-like protein (Fragment) (AHRD V1 *-*- B2ZME9_9ASTR)%3B contains Int	at1g31830.2	| symbols: | amino acid permease family protein | chr1:11418875-11420314 reverse length	Solyc09g092420.1.1	SL2.40ch09	66868801	66870586	TES0503	96.858	67022547	TEI0466	101.198	66845744	\N	\N	membrane	GO:0016020	\N	\N	#N/A	#N/A	Solyc09g092420.1	1.46423e-05	3.29516	3.29516	ARF2sm-42G up vs wt-42G	0	0	0		0	0	0
Solyc09g097960.2	ARF2sm-42Gvswt-42G diff			ARF2sm-42G up vs wt-42G			ARF2sm-42G up vs wt-42G	Aldo/keto reductase family protein (AHRD V1 **-- D7KWQ9_ARALY)%3B contains Interpro dom	at1g60710.1	| symbols: atb2 | nad(p)-linked oxidoreductase superfamily protein | chr1:22355073-2235	Solyc09g097960.2.1	SL2.40ch09	67190684	67192297	tma0229	109.033	67585378	TES0842	94.525	67136703	oxidation-reduction process	GO:0055114	\N	\N	\N	\N	#N/A	#N/A	Solyc09g097960.2	0.00262483	12.8017	12.8017	ARF2sm-42G up vs wt-42G	0	0	0		0	0	0
Solyc10g006720.2	ARF2sm-42Gvswt-42G diff			ARF2sm-42G up vs wt-42G			ARF2sm-42G up vs wt-42G	Serine/threonine-protein kinase receptor (AHRD V1 **** B6U2B7_MAIZE)%3B contains Interp	at4g27290.1	| symbols: | s-locus lectin protein kinase family protein | chr4:13666281-13669202 forw	Solyc10g006720.2.1	SL2.40ch10	1184213	1188819	TES1454	5.702	1225374	cLEC-5-E20	3.666	1177650	\N	\N	\N	\N	protein serine/threonine kinase activity transmembrane receptor protein kinase activity	GO:0004674 GO:0019199	NA	Serine/threonine-protein kinase receptor	Solyc10g006720.2	3.55101e-06	7.19595	7.19595	ARF2sm-42G up vs wt-42G	0	0	0		0	0	0
Solyc10g007360.2	ARF2sm-42Gvswt-42G diff			ARF2sm-42G up vs wt-42G			ARF2sm-42G up vs wt-42G	Multidrug resistance protein mdtK (AHRD V1 ***- MDTK_YERE8)%3B contains Interpro domain	at3g23550.1	| symbols: | mate efflux family protein | chr3:8448435-8450649 reverse length=469	Solyc10g007360.2.1	SL2.40ch10	1745159	1749319	TEI0190	14.461	1825477	T1551	11.376	1625754	\N	\N	\N	\N	solute:hydrogen antiporter activity	GO:0015299	NA	Multidrug resistance protein mdtK	Solyc10g007360.2	0.00315591	2.23805	2.23805	ARF2sm-42G up vs wt-42G	0	0	0		0	0	0
Solyc10g009290.1	ARF2sm-42Gvswt-42G diff			ARF2sm-42G up vs wt-42G			ARF2sm-42G up vs wt-42G	BHLH transcription factor (AHRD V1 *-** Q401N4_9LILI)%3B contains Interpro domain(s) I	at4g00870.1	| symbols: | basic helix-loop-helix (bhlh) dna-binding superfamily protein | chr4:36223	Solyc10g009290.1.1	SL2.40ch10	3284486	3285841	TGS1326	25.035	3409062	TES0440	22.625	3005580	\N	\N	\N	\N	sequence-specific DNA binding transcription factor activity	GO:0003700	#N/A	#N/A	Solyc10g009290.1	0.000418745	2.27329	2.27329	ARF2sm-42G up vs wt-42G	0	0	0		0	0	0
Solyc10g055810.1	ARF2sm-42Gvswt-42G diff			ARF2sm-42G up vs wt-42G			ARF2sm-42G up vs wt-42G	Endochitinase (Chitinase) (AHRD V1 **** Q43184_SOLTU)%3B contains Interpro domain(s) I													\N	\N	\N	\N	endochitinase activity	GO:0008843	NA	basic chitinase	Solyc10g055810.1	0.00235912	22.8016	22.8016	ARF2sm-42G up vs wt-42G	0	0	0		0	0	0
Solyc10g079860.1	ARF2sm-42Gvswt-42G diff			ARF2sm-42G up vs wt-42G			ARF2sm-42G up vs wt-42G	Beta-1 3-glucanase (AHRD V1 ***- Q68V46_OLEEU)%3B contains Interpro domain(s) IPR00049	at3g57270.1	| symbols: bg1 | beta-1 3-glucanase 1 | chr3:21191336-21193118 reverse length=340 | sym	Solyc10g079860.1.1	SL2.40ch10	60654548	60655705	cTOB-8-M7	53.089	61137658	TES0140	50.359	60468724	\N	\N	\N	\N	cellulase activity protein binding	GO:0008810 GO:0005515	cellulose biosynthesis	cellulase	Solyc10g079860.1	0.00129734	17.9141	17.9141	ARF2sm-42G up vs wt-42G	0	0	0		0	0	0
Solyc10g083730.1	ARF2sm-42Gvswt-42G diff			ARF2sm-42G up vs wt-42G			ARF2sm-42G up vs wt-42G	F-box protein PP2-B1 (AHRD V1 *-*- PP2B1_ARATH)%3B contains Interpro domain(s) IPR0018	at3g53000.1	| symbols: atpp2-a15 pp2-a15 | phloem protein 2-a15 | chr3:19654278-19655801 forward l	Solyc10g083730.1.1	SL2.40ch10	62824693	62827560	TEI0396	67.599	62828769	TGS1951	66.102	62774734	\N	\N	\N	\N	\N	\N	#N/A	#N/A	Solyc10g083730.1	0.000910971	2.83492	2.83492	ARF2sm-42G up vs wt-42G	0	0	0		0	0	0
Solyc11g005860.1	ARF2sm-42Gvswt-42G diff			ARF2sm-42G up vs wt-42G			ARF2sm-42G up vs wt-42G	Cysteine desulfurase (AHRD V1 **-- A4A4I5_9GAMM)%3B contains Interpro domain(s) IPR000	none	none none	Solyc11g005860.1.1	SL2.40ch11	687944	690811	TES0402	5.525	707103	cTOA-5-G7	6.529	651658	metabolic process	GO:0008152	\N	\N	pyridoxal phosphate binding	GO:0030170	alanine biosynthesis III	Cysteine desulfurase	Solyc11g005860.1	0.00162509	2.26388	2.26388	ARF2sm-42G up vs wt-42G	0	0	0		0	0	0
Solyc11g007760.1	ARF2sm-42Gvswt-42G diff			ARF2sm-42G up vs wt-42G			ARF2sm-42G up vs wt-42G	Protein kinase 3 (AHRD V1 ***- D3BKW3_POLPA)%3B contains Interpro domain(s) IPR015746	at3g10540.1	| symbols: | 3-phosphoinositide-dependent protein kinase | chr3:3289916-3292429 forward	Solyc11g007760.1.1	SL2.40ch11	1978088	1983128	TG651	30.728	2267199	SSR136	25.599	1866103	protein phosphorylation	GO:0006468	\N	\N	\N	\N	NA	Protein kinase 3	Solyc11g007760.1	0.00185524	2.9861	2.9861	ARF2sm-42G up vs wt-42G	0	0	0		0	0	0
Solyc11g010380.1	ARF2sm-42Gvswt-42G diff			ARF2sm-42G up vs wt-42G			ARF2sm-42G up vs wt-42G	Mate efflux family protein (AHRD V1 **-- D7MN36_ARALY)%3B contains Interpro domain(s)	at5g65380.1	| symbols: | mate efflux family protein | chr5:26123241-26126352 reverse length=486	Solyc11g010380.1.1	SL2.40ch11	3451737	3457412	TGS1281	46.142	3586347	TES1001	32.18	3406749	\N	\N	membrane	GO:0016020	\N	\N	#N/A	#N/A	Solyc11g010380.1	0.000957196	2.15561	2.15561	ARF2sm-42G up vs wt-42G	0	0	0		0	0	0
Solyc11g062400.1	ARF2sm-42Gvswt-42G diff			ARF2sm-42G up vs wt-42G			ARF2sm-42G up vs wt-42G	ATP binding / serine-threonine kinase (AHRD V1 **** C5DB71_VITVI)%3B contains Interpro	at2g02800.2	| symbols: apk2b | protein kinase 2b | chr2:796889-799250 reverse length=426 | symbols:	Solyc11g062400.1.1	SL2.40ch11	46486889	46489897	TGS2425	66.657	46515526	TGS0104	66.773	44777260	\N	\N	\N	\N	protein serine/threonine kinase activity protein binding	GO:0004674 GO:0005515	NA	protein kinase 2B	Solyc11g062400.1	0.000920379	3.86787	3.86787	ARF2sm-42G up vs wt-42G	0	0	0		0	0	0
Solyc12g005200.1	ARF2sm-42Gvswt-42G diff			ARF2sm-42G up vs wt-42G			ARF2sm-42G up vs wt-42G	Electron transfer flavoprotein alpha subunit (AHRD V1 **** B2ICV7_BEII9)%3B contains In	at1g50940.1	| symbols: etfalpha | electron transfer flavoprotein alpha | chr1:18878038-18879939 rev	Solyc12g005200.1.1	SL2.40ch12	131226	135857	TES1635	7.679	209686	\NA	\NA	\NA	\N	\N	\N	\N	electron carrier activity Rab GTPase binding	GO:0009055 GO:0017137	#N/A	#N/A	Solyc12g005200.1	0.000411011	2.01203	2.01203	ARF2sm-42G up vs wt-42G	0	0	0		0	0	0
Solyc12g006020.1	ARF2sm-42Gvswt-42G diff			ARF2sm-42G up vs wt-42G			ARF2sm-42G up vs wt-42G	LRR receptor-like serine/threonine-protein kinase%2C RLP	at5g25910.1	| symbols: atrlp52 rlp52 | receptor like protein 52 | chr5:9038860-9041377 forward len	Solyc12g006020.1.1	SL2.40ch12	622382	625015	TES0618	15.067	786456	cLPT-6-E9	12.168	559305	\N	\N	\N	\N	transmembrane receptor protein serine/threonine kinase activity	GO:0004675	#N/A	#N/A	Solyc12g006020.1	0.00221962	6.13229	6.13229	ARF2sm-42G up vs wt-42G	0	0	0		0	0	0
Solyc12g006850.1	ARF2sm-42Gvswt-42G diff			ARF2sm-42G up vs wt-42G			ARF2sm-42G up vs wt-42G	Potassium channel (AHRD V1 ***- Q9LEG6_SOLLC)%3B contains Interpro domain(s) IPR002110	at2g26650.1	| symbols: akt1 atakt1 kt1 | k+ transporter 1 | chr2:11331965-11336444 reverse length	Solyc12g006850.1.1	SL2.40ch12	1258370	1264932	tme0054	26.442	1351097	TES0618	15.067	786456	\N	\N	membrane	GO:0016020	\N	\N	#N/A	#N/A	Solyc12g006850.1	1.32714e-05	2.9454	2.9454	ARF2sm-42G up vs wt-42G	0	0	0		0	0	0
Solyc12g010670.1	ARF2sm-42Gvswt-42G diff			ARF2sm-42G up vs wt-42G			ARF2sm-42G up vs wt-42G	RING finger protein 5 (AHRD V1 *--- B6UBI0_MAIZE)%3B contains Interpro domain(s) IPR01	at4g27470.1	| symbols: atrma3 rma3 | ring membrane-anchor 3 | chr4:13735576-13736307 forward lengt	Solyc12g010670.1.1	SL2.40ch12	3614742	3615416	TES0316	46.034	3712340	TES0716	43.553	3563875	\N	\N	\N	\N	ubiquitin-protein ligase activity	GO:0004842	NA	ubiquitin-protein ligase	Solyc12g010670.1	0.000844428	4.17892	4.17892	ARF2sm-42G up vs wt-42G	0	0	0		0	0	0
Solyc12g014010.1	ARF2sm-42Gvswt-42G diff			ARF2sm-42G up vs wt-42G			ARF2sm-42G up vs wt-42G	Glucosyltransferase (AHRD V1 ***- Q8RU72_TOBAC)%3B contains Interpro domain(s) IPR0022	at3g21750.1	| symbols: ugt71b1 | udp-glucosyl transferase 71b1 | chr3:7664565-7665986 forward lengt	Solyc12g014010.1.1	SL2.40ch12	4844617	4847217	TES2042	48.922	4913463	TGS0456	48.57	4766542	metabolic process	GO:0008152	\N	\N	\N	\N	NA	UDP-glycosyltransferase	Solyc12g014010.1	0.000166242	12.062	12.062	ARF2sm-42G up vs wt-42G	0	0	0		0	0	0
Solyc12g017530.1	ARF2sm-42Gvswt-42G diff			ARF2sm-42G up vs wt-42G			ARF2sm-42G up vs wt-42G	Unknown Protein (AHRD V1)	at2g44080.1	| symbols: arl | argos-like | chr2:18237726-18238133 forward length=135	Solyc12g017530.1.1	SL2.40ch12	6800110	6800403	TGS1082	61.814	7273186	TES1779	56.872	6458436	\N	\N	\N	\N	\N	\N	#N/A	#N/A	Solyc12g017530.1	0.00323297	6.89723	6.89723	ARF2sm-42G up vs wt-42G	0	0	0		0	0	0
Solyc12g042480.1	ARF2sm-42Gvswt-42G diff			ARF2sm-42G up vs wt-42G			ARF2sm-42G up vs wt-42G	Cytochrome P450 Cytochrome P450	at5g57260.1	| symbols: cyp71b10 | cytochrome p450 family 71 subfamily b polypeptide 10 | chr5:23	Solyc12g042480.1.1	SL2.40ch12	43228603	43230210	TGS2938	60.487	43380463	TGS2342	61.564	41975119	\N	\N	\N	\N	oxygen binding	GO:0019825	NA	Cytochrome P450	Solyc12g042480.1	0.001592	5.27555	5.27555	ARF2sm-42G up vs wt-42G	0	0	0		0	0	0
Solyc12g049030.1	ARF2sm-42Gvswt-42G diff			ARF2sm-42G up vs wt-42G			ARF2sm-42G up vs wt-42G	Fatty acid desaturase (AHRD V1 ***- B3SP99_CAPAN)%3B contains Interpro domain(s) IPR00	at3g12120.2	| symbols: fad2 | fatty acid desaturase 2 | chr3:3860592-3861743 reverse length=383	Solyc12g049030.1.1	SL2.40ch12	45906133	45907287	tma0076	59.189	46020356	TGS1093	52.744	45790768	oxidation-reduction process	GO:0055114	\N	\N	\N	\N	oleate biosynthesis II (animals)	Fatty acid desaturase	Solyc12g049030.1	0.0011763	58.1953	58.1953	ARF2sm-42G up vs wt-42G	0	0	0		0	0	0
Solyc12g049530.1	ARF2sm-42Gvswt-42G diff			ARF2sm-42G up vs wt-42G			ARF2sm-42G up vs wt-42G	Unknown Protein (AHRD V1)													\N	\N	\N	\N	\N	\N	#N/A	#N/A	Solyc12g049530.1	0.00271575	2.65649	2.65649	ARF2sm-42G up vs wt-42G	0	0	0		0	0	0
Solyc12g088870.1	ARF2sm-42Gvswt-42G diff			ARF2sm-42G up vs wt-42G			ARF2sm-42G up vs wt-42G	Unknown Protein (AHRD V1)	at5g42750.1	| symbols: bki1 | bri1 kinase inhibitor 1 | chr5:17143028-17144041 reverse length=337	Solyc12g088870.1.1	SL2.40ch12	62516189	62516341	TES0338	82.601	62516395	T1483	79.673	62393053	\N	\N	\N	\N	\N	\N	#N/A	#N/A	Solyc12g088870.1	0.00216596	2.42034	2.42034	ARF2sm-42G up vs wt-42G	0	0	0		0	0	0
Solyc12g089180.1	ARF2sm-42Gvswt-42G diff			ARF2sm-42G up vs wt-42G			ARF2sm-42G up vs wt-42G	Glucose transporter 8 (AHRD V1 ***- Q2KKJ3_SOLIN)%3B contains Interpro domain(s) IPR00	at1g19450.1	| symbols: | major facilitator superfamily protein | chr1:6731671-6734633 reverse lengt	Solyc12g089180.1.1	SL2.40ch12	62736297	62742836	TES0717	88.604	62957876	C2_At4g16580	81.122	62657471	\N	\N	membrane integral to membrane	GO:0016020 GO:0016021	phosphopantetheine binding	GO:0031177	#N/A	#N/A	Solyc12g089180.1	0.000286464	2.68096	2.68096	ARF2sm-42G up vs wt-42G	0	0	0		0	0	0
Solyc12g100250.1	ARF2sm-42Gvswt-42G diff			ARF2sm-42G up vs wt-42G			ARF2sm-42G up vs wt-42G	Fatty acid desaturase (AHRD V1 ***- B3SP99_CAPAN)%3B contains Interpro domain(s) IPR00	at3g12120.2	| symbols: fad2 | fatty acid desaturase 2 | chr3:3860592-3861743 reverse length=383	Solyc12g100250.1.1	SL2.40ch12	65373851	65374990	TGS0591	118.396	65390334	TES1724	116.7	64942078	oxidation-reduction process	GO:0055114	\N	\N	\N	\N	oleate biosynthesis II (animals)	Fatty acid desaturase	Solyc12g100250.1	0.00111741	24.6984	24.6984	ARF2sm-42G up vs wt-42G	0	0	0		0	0	0
Solyc12g100270.1	ARF2sm-42Gvswt-42G diff			ARF2sm-42G up vs wt-42G			ARF2sm-42G up vs wt-42G	CER1 (AHRD V1 **-- B6TFH3_MAIZE)%3B contains Interpro domain(s) IPR006694 Fatty acid	at1g02205.2	| symbols: cer1 | fatty acid hydroxylase superfamily | chr1:418818-422154 forward lengt	Solyc12g100270.1.1	SL2.40ch12	65384049	65386792	TGS0591	118.396	65390334	TES1724	116.7	64942078	proteolysis	GO:0006508	endoplasmic reticulum	GO:0005783	\N	\N	cuticular wax biosynthesis	fatty aldehyde decarbonylase	Solyc12g100270.1	0.00122513	12.7272	12.7272	ARF2sm-42G up vs wt-42G	0	0	0		0	0	0
Solyc02g092640.2		ARF2sm-42R vs wt-42G diff			ARF2sm-42R up vs wt-42G		ARF2sm-42R up vs wt-42G	Casein kinase (AHRD V1 ***- C5JNY0_AJEDS)%3B contains Interpro domain(s) IPR002290 Se	at5g67380.1	| symbols: cka1 atcka1 | casein kinase alpha 1 | chr5:26881156-26883383 reverse length	Solyc02g092640.2.1	SL2.40ch02	48238108	48244942	TES1753	144.096	48266264	TES1644	139.344	47968139	protein phosphorylation	GO:0006468	\N	\N	\N	\N	NA	protein kinase CK2 alpha subunit	Solyc02g092640.2	0	0	0		5.31776e-07	2.22588	2.22588	ARF2sm-42R up vs wt-42G	0	0	0
Solyc02g092820.2		ARF2sm-42R vs wt-42G diff			ARF2sm-42R up vs wt-42G		ARF2sm-42R up vs wt-42G	Indole-3-acetic acid-amido synthetase GH3.8 (AHRD V1 **** B6U4E2_MAIZE)%3B contains Int	at2g14960.1	| symbols: gh3.1 | auxin-responsive gh3 family protein | chr2:6451659-6453670 reverse l	Solyc02g092820.2.1	SL2.40ch02	48369709	48372206	C2_At4g37300	146.225	48412941	TES1753	144.096	48266264	\N	\N	\N	\N	indole-3-acetic acid amido synthetase activity	GO:0010279	#N/A	#N/A	Solyc02g092820.2	0	0	0		0.000368668	7.35805	7.35805	ARF2sm-42R up vs wt-42G	0	0	0
Solyc02g093390.2		ARF2sm-42R vs wt-42G diff			ARF2sm-42R up vs wt-42G		ARF2sm-42R up vs wt-42G	Ribosomal RNA-processing protein (AHRD V1 ***- B6K4Z8_SCHJY)%3B contains Interpro domai	at5g40530.1	| symbols: | s-adenosyl-l-methionine-dependent methyltransferases superfamily protein |	Solyc02g093390.2.1	SL2.40ch02	48850317	48853426	TES0567	155.127	48968771	TES1925	151.9	48631444	\N	\N	\N	\N	methylated histone residue binding S-adenosylmethionine-dependent methyltransferase act	GO:0035064 GO:0008757	#N/A	#N/A	Solyc02g093390.2	0	0	0		8.07313e-05	2.03364	2.03364	ARF2sm-42R up vs wt-42G	0	0	0
Solyc02g093520.2		ARF2sm-42R vs wt-42G diff			ARF2sm-42R up vs wt-42G		ARF2sm-42R up vs wt-42G	Copine-like protein (AHRD V1 ***- Q153E2_ORYSJ)%3B contains Interpro domain(s) IPR0107	at5g14420.2	| symbols: rglg2 | ring domain ligase2 | chr5:4648355-4650563 reverse length=468	Solyc02g093520.2.1	SL2.40ch02	48940256	48944306	TES0567	155.127	48968771	C2_At5g40530	154.13	48853092	\N	\N	\N	\N	ubiquitin-protein ligase activity	GO:0004842	NA	ubiquitin-protein ligase	Solyc02g093520.2	0	0	0		0.000666575	2.02995	2.02995	ARF2sm-42R up vs wt-42G	0	0	0
Solyc02g093680.2		ARF2sm-42R vs wt-42G diff			ARF2sm-42R up vs wt-42G		ARF2sm-42R up vs wt-42G	Succinate dehydrogenase iron-sulfur protein (AHRD V1 **** C0NQC7_AJECG)%3B contains Int	at5g40650.1	| symbols: sdh2-2 | succinate dehydrogenase 2-2 | chr5:16281462-16283296 forward length	Solyc02g093680.2.1	SL2.40ch02	49014535	49017784	TES0490	155.143	49027153	TES0567	155.127	48968771	\N	\N	\N	\N	zinc ion binding succinate dehydrogenase activity	GO:0008270 GO:0000104	aerobic respiration -- electron donor II	mitochondrial succinate dehydrogenase iron sulfur subunit	Solyc02g093680.2	0	0	0		4.34223e-05	2.17036	2.17036	ARF2sm-42R up vs wt-42G	0	0	0
Solyc02g093880.2		ARF2sm-42R vs wt-42G diff			ARF2sm-42R up vs wt-42G		ARF2sm-42R up vs wt-42G	DNA-binding bromodomain-containing protein (AHRD V1 **-* D7MP02_ARALY)%3B contains Inte	at3g27260.1	| symbols: gte8 | global transcription factor group e8 | chr3:10068411-10072403 forward	Solyc02g093880.2.1	SL2.40ch02	49151330	49155789	T1096	155.555	49181607	TES0490	155.143	49027153	\N	\N	\N	\N	protein binding DNA binding	GO:0005515 GO:0003677	#N/A	#N/A	Solyc02g093880.2	0	0	0		9.82286e-06	2.20631	2.20631	ARF2sm-42R up vs wt-42G	0	0	0
Solyc02g093910.2		ARF2sm-42R vs wt-42G diff			ARF2sm-42R up vs wt-42G		ARF2sm-42R up vs wt-42G	Kelch repeat-containing protein-like (AHRD V1 ***- Q6ZK44_ORYSJ)%3B contains Interpro d	at1g51540.1	| symbols: | galactose oxidase/kelch repeat superfamily protein | chr1:19115702-1911738	Solyc02g093910.2.1	SL2.40ch02	49183590	49186451	TES0088	156.676	49260919	T1096	155.555	49181607	\N	\N	\N	\N	protein binding	GO:0005515	#N/A	#N/A	Solyc02g093910.2	0	0	0		0.00573011	2.4109	2.4109	ARF2sm-42R up vs wt-42G	0	0	0
Solyc03g005090.2		ARF2sm-42R vs wt-42G diff			ARF2sm-42R up vs wt-42G		ARF2sm-42R up vs wt-42G	4-coumarate-coa ligase (AHRD V1 *-*- B9MY03_POPTR)%3B contains Interpro domain(s) IPR0	at3g01750.1	| symbols: | ankyrin repeat family protein | chr3:270615-272691 forward length=664 | sy	Solyc03g005090.2.1	SL2.40ch03	60385	67905	TEI0528	5.15	224947	TG479	0	44712	metabolic process	GO:0008152	\N	\N	\N	\N	simple coumarins biosynthesis	4-coumarate-coa ligase	Solyc03g005090.2	0	0	0		0.00188461	2.29445	2.29445	ARF2sm-42R up vs wt-42G	0	0	0
Solyc03g005270.2		ARF2sm-42R vs wt-42G diff			ARF2sm-42R up vs wt-42G		ARF2sm-42R up vs wt-42G	Transmembrane emp24 domain-containing protein 3 (AHRD V1 ***- B6TE63_MAIZE)%3B contains	at3g22845.1	| symbols: | emp24/gp25l/p24 family/gold family protein | chr3:8087373-8088550 forward	Solyc03g005270.2.1	SL2.40ch03	155120	160534	TEI0528	5.15	224947	TG479	0	44712	\N	\N	\N	\N	receptor binding protein complex binding	GO:0005102 GO:0032403	#N/A	#N/A	Solyc03g005270.2	0	0	0		2.94775e-05	2.12487	2.12487	ARF2sm-42R up vs wt-42G	0	0	0
Solyc03g006010.2		ARF2sm-42R vs wt-42G diff			ARF2sm-42R up vs wt-42G		ARF2sm-42R up vs wt-42G	Os05g0272200 protein (Fragment) (AHRD V1 *-*- Q0DJJ5_ORYSJ)	at1g17030.1	| symbols: | unknown protein functions in: molecular_function unknown involved in: bi	Solyc03g006010.2.1	SL2.40ch03	683851	686834	TES0894	15.745	924708	TES1207	7.149	493439	\N	\N	\N	\N	\N	\N	#N/A	#N/A	Solyc03g006010.2	0	0	0		0.00075888	3.17663	3.17663	ARF2sm-42R up vs wt-42G	0	0	0
Solyc03g006020.2		ARF2sm-42R vs wt-42G diff			ARF2sm-42R up vs wt-42G		ARF2sm-42R up vs wt-42G	Ubiquitin domain containing 1 (AHRD V1 ***- B6T693_MAIZE)	at1g53400.1	| symbols: | ubiquitin domain-containing protein | chr1:19925009-19926400 forward lengt	Solyc03g006020.2.1	SL2.40ch03	687640	692338	TES0894	15.745	924708	TES1207	7.149	493439	\N	\N	\N	\N	protein binding	GO:0005515	#N/A	#N/A	Solyc03g006020.2	0	0	0		0.00331445	2.07518	2.07518	ARF2sm-42R up vs wt-42G	0	0	0
Solyc03g006400.2		ARF2sm-42R vs wt-42G diff			ARF2sm-42R up vs wt-42G		ARF2sm-42R up vs wt-42G	Protein kinase (AHRD V1 ***- Q39886_SOYBN)%3B contains Interpro domain(s) IPR001245 T	at5g58950.1	| symbols: | protein kinase superfamily protein | chr5:23801136-23803025 reverse length	Solyc03g006400.2.1	SL2.40ch03	996867	999265	TGS1138	27.735	1325104	TES0894	15.745	924708	protein phosphorylation	GO:0006468	\N	\N	\N	\N	NA	Protein kinase	Solyc03g006400.2	0	0	0		0.00134803	5.31714	5.31714	ARF2sm-42R up vs wt-42G	0	0	0
Solyc03g006820.2		ARF2sm-42R vs wt-42G diff			ARF2sm-42R up vs wt-42G		ARF2sm-42R up vs wt-42G	Oxidoreductase 2OG-Fe(II) oxygenase family family (Fragment) (AHRD V1 **-- Q08MC8_STIAU	at5g51880.1	| symbols: | 2-oxoglutarate (2og) and fe(ii)-dependent oxygenase superfamily protein |	Solyc03g006820.2.1	SL2.40ch03	1322822	1326576	T1286	24.428	1384079	TES0894	15.745	924708	oxidation-reduction process	GO:0055114	\N	\N	\N	\N	#N/A	#N/A	Solyc03g006820.2	0	0	0		0.00121825	2.03453	2.03453	ARF2sm-42R up vs wt-42G	0	0	0
Solyc03g007190.2		ARF2sm-42R vs wt-42G diff			ARF2sm-42R up vs wt-42G		ARF2sm-42R up vs wt-42G	SPFH domain / Band 7 family protein (AHRD V1 *--- Q6L4B0_SOLDE)%3B contains Interpro do	at5g51570.1	| symbols: | spfh/band 7/phb domain-containing membrane-associated protein family | chr	Solyc03g007190.2.1	SL2.40ch03	1764428	1769612	TES0480	35.64	1783682	TGS0740	33.661	1691185	\N	\N	\N	\N	protein binding	GO:0005515	#N/A	#N/A	Solyc03g007190.2	0	0	0		7.42636e-05	2.19536	2.19536	ARF2sm-42R up vs wt-42G	0	0	0
Solyc03g031670.2		ARF2sm-42R vs wt-42G diff			ARF2sm-42R up vs wt-42G		ARF2sm-42R up vs wt-42G	Calcium-dependent protein kinase (AHRD V1 **** Q8RW36_SOLLC)%3B contains Interpro domai	at4g04720.1	| symbols: cpk21 | calcium-dependent protein kinase 21 | chr4:2394817-2397631 reverse l	Solyc03g031670.2.1	SL2.40ch03	8397378	8406044	TES1084	53.443	8592459	TES1049	53.632	8258871	\N	\N	\N	\N	calmodulin-dependent protein kinase activity	GO:0004683	NA	Calcium-dependent protein kinase	Solyc03g031670.2	0	0	0		0.000412582	2.02247	2.02247	ARF2sm-42R up vs wt-42G	0	0	0
Solyc03g032090.1		ARF2sm-42R vs wt-42G diff			ARF2sm-42R up vs wt-42G		ARF2sm-42R up vs wt-42G	Amino acid transporter family protein (AHRD V1 **** D7LI10_ARALY)%3B contains Interpro	at4g38250.1	| symbols: | transmembrane amino acid transporter family protein | chr4:17935533-179368	Solyc03g032090.1.1	SL2.40ch03	8889972	8891255	TES1712	49.845	9198684	TES1317	53.41	8795719	\N	\N	\N	\N	glycine transmembrane transporter activity	GO:0015187	#N/A	#N/A	Solyc03g032090.1	0	0	0		0.00135747	2.31486	2.31486	ARF2sm-42R up vs wt-42G	0	0	0
Solyc03g033340.2		ARF2sm-42R vs wt-42G diff			ARF2sm-42R up vs wt-42G		ARF2sm-42R up vs wt-42G	Protein phosphatase 2C (AHRD V1 ***- B6SYG9_MAIZE)%3B contains Interpro domain(s) IPR0	at4g38520.2	| symbols: | protein phosphatase 2c family protein | chr4:18015999-18017514 reverse len	Solyc03g033340.2.1	SL2.40ch03	9193147	9197708	TES1712	49.845	9198684	TES1317	53.41	8795719	\N	\N	protein serine/threonine phosphatase complex	GO:0008287	catalytic activity	GO:0003824	NA	Protein phosphatase 2C	Solyc03g033340.2	0	0	0		0.00058951	2.10911	2.10911	ARF2sm-42R up vs wt-42G	0	0	0
Solyc03g034320.2		ARF2sm-42R vs wt-42G diff			ARF2sm-42R up vs wt-42G		ARF2sm-42R up vs wt-42G	Class I glutamine amidotransferase (AHRD V1 *-*- D4V3L4_BACVU)%3B contains Interpro dom	at5g38200.1	| symbols: | class i glutamine amidotransferase-like superfamily protein | chr5:1525638	Solyc03g034320.2.1	SL2.40ch03	10344778	10348543	TGS0064	55.979	10987801	tmb0008	54.858	10153790	glutamine metabolic process	GO:0006541	\N	\N	\N	\N	NA	Gamma-glutamyl-gamma-aminobutyrate hydrolase, putative	Solyc03g034320.2	0	0	0		0.00865195	2.3077	2.3077	ARF2sm-42R up vs wt-42G	0	0	0
Solyc03g043880.2		ARF2sm-42R vs wt-42G diff			ARF2sm-42R up vs wt-42G		ARF2sm-42R up vs wt-42G	Branched-chain amino acid aminotransferase (AHRD V1 **** Q9SNY9_SOLTU)%3B contains Inte	at5g65780.1	| symbols: atbcat-5 | branched-chain amino acid aminotransferase 5 / branched-chain ami	Solyc03g043880.2.1	SL2.40ch03	11506663	11513215	TGS2705	47.801	14174762	TGS0064	55.979	10987801	\N	\N	\N	\N	branched-chain-amino-acid transaminase activity	GO:0004084	isoleucine degradation II	branched-chain-amino-acid transaminase	Solyc03g043880.2	0	0	0		0.000816932	2.558	2.558	ARF2sm-42R up vs wt-42G	0	0	0
Solyc03g046310.1		ARF2sm-42R vs wt-42G diff			ARF2sm-42R up vs wt-42G		ARF2sm-42R up vs wt-42G	Unknown Protein (AHRD V1)	at5g15900.1	| symbols: tbl19 | trichome birefringence-like 19 | chr5:5189524-5192070 reverse length	Solyc03g046310.1.1	SL2.40ch03	16200022	16200213	tma0069	57.019	18861939	tma0123	58.664	16085379	\N	\N	\N	\N	\N	\N	#N/A	#N/A	Solyc03g046310.1	0	0	0		0.00318286	2.04407	2.04407	ARF2sm-42R up vs wt-42G	0	0	0
Solyc03g062650.2		ARF2sm-42R vs wt-42G diff			ARF2sm-42R up vs wt-42G		ARF2sm-42R up vs wt-42G	Thyroid adenoma-associated protein homolog (AHRD V1 *--- THADA_CANFA)%3B contains Inter	at3g55160.1	| symbols: | unknown protein expressed in: 11 plant structures expressed during: 4 an	Solyc03g062650.2.1	SL2.40ch03	29016655	29027067	TES1504	60.174	29845443	TGS3492	63.902	28110633	oxidation-reduction process	GO:0055114	\N	\N	\N	\N	#N/A	#N/A	Solyc03g062650.2	0	0	0		0.00177025	2.01347	2.01347	ARF2sm-42R up vs wt-42G	0	0	0
Solyc03g095960.1		ARF2sm-42R vs wt-42G diff			ARF2sm-42R up vs wt-42G		ARF2sm-42R up vs wt-42G	Pentatricopeptide repeat-containing protein (AHRD V1 ***- D7LEH5_ARALY)%3B contains Int	at2g40240.1	| symbols: | tetratricopeptide repeat (tpr)-like superfamily protein | chr2:16811051-16	Solyc03g095960.1.1	SL2.40ch03	51114552	51115541	TES1222	59.997	51882257	TES0174	58.728	50421752	\N	\N	\N	\N	\N	\N	#N/A	#N/A	Solyc03g095960.1	0	0	0		0.00673817	2.39747	2.39747	ARF2sm-42R up vs wt-42G	0	0	0
Solyc03g096050.2		ARF2sm-42R vs wt-42G diff			ARF2sm-42R up vs wt-42G		ARF2sm-42R up vs wt-42G	1-aminocyclopropane-1-carboxylate oxidase 1 (AHRD V1 **-* ACCO1_SOLLC)%3B contains Inte	at5g05600.1	| symbols: | 2-oxoglutarate (2og) and fe(ii)-dependent oxygenase superfamily protein |	Solyc03g096050.2.1	SL2.40ch03	51317291	51320454	TES1222	59.997	51882257	TES0174	58.728	50421752	\N	\N	\N	\N	oxidoreductase activity, acting on paired donors, with incorporation or reduction of mo	GO:0016706 GO:0009815	ethylene biosynthesis from methionine	1-aminocyclopropane-1-carboxylate oxidase	Solyc03g096050.2	0	0	0		0.00458094	7.27249	7.27249	ARF2sm-42R up vs wt-42G	0	0	0
Solyc01g099750.2	ARF2sm-42Gvswt-42G diff		wt-53R vs wt-42G diff	ARF2sm-42G up vs wt-42G		wt-53R up vs wt-42G	ARF2sm-42G&wt-53R up vs wt-42G	Heparan-alpha-glucosaminide N-acetyltransferase (AHRD V1 **-- D2QUR2_SPILD)%3B contains	at5g27730.1	| symbols: | protein of unknown function (duf1624) | chr5:9820311-9822868 forward lengt	Solyc01g099750.2.1	SL2.40ch01	81661020	81665918	TEI0088	106.546	81670760	T1488	103.766	81429728	\N	\N	\N	\N	\N	\N	NA	Heparan-alpha-glucosaminide N-acetyltransferase	Solyc01g099750.2	0.00186354	2.6412	2.6412	ARF2sm-42G up vs wt-42G	0	0	0		0.008752	2.18317	2.18317	wt-53R up vs wt-42G
Solyc01g107400.2	ARF2sm-42Gvswt-42G diff		wt-53R vs wt-42G diff	ARF2sm-42G up vs wt-42G		wt-53R up vs wt-42G	ARF2sm-42G&wt-53R up vs wt-42G	Indole-3-acetic acid-amido synthetase GH3.8 (AHRD V1 ***- B6U4E2_MAIZE)	at2g14960.1	| symbols: gh3.1 | auxin-responsive gh3 family protein | chr2:6451659-6453670 reverse l	Solyc01g107400.2.1	SL2.40ch01	86730679	86731267	TES0985	136.43	86940830	TGS2980	138.235	86588532	\N	\N	\N	\N	\N	\N	#N/A	#N/A	Solyc01g107400.2	0.00253403	6.97284	6.97284	ARF2sm-42G up vs wt-42G	0	0	0		0.00749368	5.68742	5.68742	wt-53R up vs wt-42G
Solyc02g030210.2	ARF2sm-42Gvswt-42G diff		wt-53R vs wt-42G diff	ARF2sm-42G up vs wt-42G		wt-53R up vs wt-42G	ARF2sm-42G&wt-53R up vs wt-42G	AP2-like ethylene-responsive transcription factor At2g41710 (AHRD V1 ***- AP2L4_ARATH)%	at2g41710.3	| symbols: | integrase-type dna-binding superfamily protein | chr2:17400274-17402903 re	Solyc02g030210.2.1	SL2.40ch02	16023195	16026741	TGS2414	3.239	18518898	TGS2279	2.426	15993856	\N	\N	\N	\N	DNA binding	GO:0003677	#N/A	#N/A	Solyc02g030210.2	0.001331	2.03673	2.03673	ARF2sm-42G up vs wt-42G	0	0	0		0.00201411	2.11517	2.11517	wt-53R up vs wt-42G
Solyc02g070670.2	ARF2sm-42Gvswt-42G diff		wt-53R vs wt-42G diff	ARF2sm-42G up vs wt-42G		wt-53R up vs wt-42G	ARF2sm-42G&wt-53R up vs wt-42G	Urease accessory protein UREG (AHRD V1 ***- Q9SYT8_ARATH)%3B contains Interpro domain(s	at2g34470.1	| symbols: ureg pskf109 | urease accessory protein g | chr2:14530900-14532411 reverse	Solyc02g070670.2.1	SL2.40ch02	34922481	34926257	T1516	48.446	34958914	TES0037	45.592	34800197	\N	\N	\N	\N	nucleotide binding metal ion binding	GO:0000166 GO:0046872	#N/A	#N/A	Solyc02g070670.2	0.000125343	3.0168	3.0168	ARF2sm-42G up vs wt-42G	0	0	0		0.00183153	2.05129	2.05129	wt-53R up vs wt-42G
Solyc02g093600.2	ARF2sm-42Gvswt-42G diff		wt-53R vs wt-42G diff	ARF2sm-42G up vs wt-42G		wt-53R up vs wt-42G	ARF2sm-42G&wt-53R up vs wt-42G	class I heat shock protein (AHRD V1 ***- Q69BI7_CARPA)%3B contains Interpro domain(s)	at1g59860.1	| symbols: | hsp20-like chaperones superfamily protein | chr1:22031474-22031941 forward	Solyc02g093600.2.1	SL2.40ch02	48980255	48981199	TES0490	155.143	49027153	TES0567	155.127	48968771	\N	\N	\N	\N	unfolded protein binding	GO:0051082	#N/A	#N/A	Solyc02g093600.2	0.00137713	8.5604	8.5604	ARF2sm-42G up vs wt-42G	0	0	0		0.00605185	5.84699	5.84699	wt-53R up vs wt-42G
Solyc03g119740.2	ARF2sm-42Gvswt-42G diff		wt-53R vs wt-42G diff	ARF2sm-42G up vs wt-42G		wt-53R up vs wt-42G	ARF2sm-42G&wt-53R up vs wt-42G	MYB transcription factor (AHRD V1 **** Q9FNN6_ARATH)%3B contains Interpro domain(s) IP	at1g49010.1	| symbols: | duplicated homeodomain-like superfamily protein | chr1:18132714-18133778 f	Solyc03g119740.2.1	SL2.40ch03	62346231	62347604	TES1026	112.666	62538280	TES0077	111.05	62313686	\N	\N	\N	\N	sequence-specific DNA binding transcription factor activity	GO:0003700	#N/A	#N/A	Solyc03g119740.2	0.00208549	2.2525	2.2525	ARF2sm-42G up vs wt-42G	0	0	0		0.00676364	2.04034	2.04034	wt-53R up vs wt-42G
Solyc03g120420.2	ARF2sm-42Gvswt-42G diff		wt-53R vs wt-42G diff	ARF2sm-42G up vs wt-42G		wt-53R up vs wt-42G	ARF2sm-42G&wt-53R up vs wt-42G	Unknown Protein (AHRD V1)	at1g52827.1	| symbols: cdt1 atcdt1 | cadmium tolerance 1 | chr1:19671598-19671894 reverse length=4	Solyc03g120420.2.1	SL2.40ch03	62873956	62875151	cLET-5-F17	117.006	62912589	TES1026	112.666	62538280	\N	\N	\N	\N	\N	\N	#N/A	#N/A	Solyc03g120420.2	0.000760152	2.24255	2.24255	ARF2sm-42G up vs wt-42G	0	0	0		0.000597781	2.6699	2.6699	wt-53R up vs wt-42G
Solyc03g121880.2	ARF2sm-42Gvswt-42G diff		wt-53R vs wt-42G diff	ARF2sm-42G up vs wt-42G		wt-53R up vs wt-42G	ARF2sm-42G&wt-53R up vs wt-42G	Protein phosphatase 2C (AHRD V1 ***- A5A6P8_WHEAT)%3B contains Interpro domain(s) IPR0	at1g72770.3	| symbols: hab1 | homology to abi1 | chr1:27390998-27392851 forward length=511	Solyc03g121880.2.1	SL2.40ch03	63965205	63970550	tme0045	130.459	63986079	SSR31	126.897	63815539	\N	\N	\N	\N	protein binding	GO:0005515	NA	homology to ABI1	Solyc03g121880.2	0.00244973	2.36522	2.36522	ARF2sm-42G up vs wt-42G	0	0	0		0.00464262	2.35768	2.35768	wt-53R up vs wt-42G
Solyc04g082200.2	ARF2sm-42Gvswt-42G diff		wt-53R vs wt-42G diff	ARF2sm-42G up vs wt-42G		wt-53R up vs wt-42G	ARF2sm-42G&wt-53R up vs wt-42G	Dehydrin (AHRD V1 *-*- Q1A4H3_COFCA)%3B contains Interpro domain(s) IPR000167 Dehydri	at1g20440.1	| symbols: cor47 rd17 atcor47 | cold-regulated 47 | chr1:7084722-7085664 reverse leng	Solyc04g082200.2.1	SL2.40ch04	63550865	63552237	TG163	126.417	63608949	TM31	132.328	63419051	response to water	GO:0009415	\N	\N	\N	\N	#N/A	#N/A	Solyc04g082200.2	0.00170138	2.3264	2.3264	ARF2sm-42G up vs wt-42G	0	0	0		0.00225809	2.49681	2.49681	wt-53R up vs wt-42G
Solyc06g082470.2	ARF2sm-42Gvswt-42G diff		wt-53R vs wt-42G diff	ARF2sm-42G up vs wt-42G		wt-53R up vs wt-42G	ARF2sm-42G&wt-53R up vs wt-42G	Serine/threonine protein kinase (AHRD V1 *-** D0NNA3_PHYIN)%3B contains Interpro domain	at5g58350.1	| symbols: wnk4 zik2 | with no lysine (k) kinase 4 | chr5:23585505-23587681 forward le	Solyc06g082470.2.1	SL2.40ch06	44554015	44559461	TEI0304	100.814	44643537	cLES-1-K3	96.506	44239435	\N	\N	\N	\N	protein kinase activity	GO:0004672	NA	with no lysine (K) kinase 4	Solyc06g082470.2	0.000453694	2.23938	2.23938	ARF2sm-42G up vs wt-42G	0	0	0		0.00138307	2.07797	2.07797	wt-53R up vs wt-42G
Solyc07g042550.2	ARF2sm-42Gvswt-42G diff		wt-53R vs wt-42G diff	ARF2sm-42G up vs wt-42G		wt-53R up vs wt-42G	ARF2sm-42G&wt-53R up vs wt-42G	Sucrose synthase (AHRD V1 **** O82691_SOLLC)%3B contains Interpro domain(s) IPR012820	at3g43190.1	| symbols: sus4 atsus4 | sucrose synthase 4 | chr3:15179204-15182577 reverse length=80	Solyc07g042550.2.1	SL2.40ch07	53300389	53305994	cLED-22-K8	32.659	53868200	TGS0787	30.725	53272966	\N	\N	\N	\N	sucrose synthase activity	GO:0016157	galactose degradation II	Sucrose synthase	Solyc07g042550.2	4.14368e-05	3.40216	3.40216	ARF2sm-42G up vs wt-42G	0	0	0		0.000346947	2.48307	2.48307	wt-53R up vs wt-42G
Solyc12g010410.1	ARF2sm-42Gvswt-42G diff		wt-53R vs wt-42G diff	ARF2sm-42G up vs wt-42G		wt-53R up vs wt-42G	ARF2sm-42G&wt-53R up vs wt-42G	Homeobox protein knotted-1-like 3 (AHRD V1 ***- B6T3D1_MAIZE)%3B contains Interpro doma	at5g25220.2	| symbols: knat3 | knotted1-like homeobox gene 3 | chr5:8736208-8738087 forward length=	Solyc12g010410.1.1	SL2.40ch12	3455837	3459360	TES0716	43.553	3563875	T1263	44.573	3440355	regulation of transcription, DNA-dependent	GO:0006355	nucleus	GO:0005634	\N	\N	#N/A	#N/A	Solyc12g010410.1	0.000369216	5.89795	5.89795	ARF2sm-42G up vs wt-42G	0	0	0		0.0033477	3.53527	3.53527	wt-53R up vs wt-42G
Solyc12g088670.1	ARF2sm-42Gvswt-42G diff		wt-53R vs wt-42G diff	ARF2sm-42G up vs wt-42G		wt-53R down vs wt-42G	ARF2sm-42G up/M82 R down vs wt-42G	Cathepsin B-like cysteine proteinase (AHRD V1 **-- CYSP_SCHMA)%3B contains Interpro dom	at1g47128.1	| symbols: rd21 rd21a | granulin repeat cysteine protease family protein | chr1:172831	Solyc12g088670.1.1	SL2.40ch12	62390540	62394311	TES0338	82.601	62516395	TGS0927	78.047	62079305	proteolysis	GO:0006508	\N	\N	cysteine-type peptidase activity	GO:0008234	#N/A	#N/A	Solyc12g088670.1	0.000885043	3.28095	3.28095	ARF2sm-42G up vs wt-42G	0	0	0		0.00382891	0.372177	-2.68689	wt-53R down vs wt-42G
Solyc03g111250.2		ARF2sm-42R vs wt-42G diff			ARF2sm-42R up vs wt-42G		ARF2sm-42R up vs wt-42G	SWI/SNF related matrix associated actin dependent regulator of chromatin subfamily d me	at5g14170.1	| symbols: chc1 | swib/mdm2 domain superfamily protein | chr5:4568696-4570444 reverse l	Solyc03g111250.2.1	SL2.40ch03	55916730	55920194	TES1272	70.168	55986096	TEI0030	68.819	55764685	\N	\N	\N	\N	transcription coactivator activity	GO:0003713	#N/A	#N/A	Solyc03g111250.2	0	0	0		0.00244707	2.10531	2.10531	ARF2sm-42R up vs wt-42G	0	0	0
Solyc03g111360.2		ARF2sm-42R vs wt-42G diff			ARF2sm-42R up vs wt-42G		ARF2sm-42R up vs wt-42G	Oxygen-independent coproporphyrinogen III oxidase-like protein sll1917 (AHRD V1 ***- B6	at5g63290.1	| symbols: | radical sam superfamily protein | chr5:25369349-25370894 reverse length=48	Solyc03g111360.2.1	SL2.40ch03	56010796	56012961	TGS2732	72.338	56273771	T1659	69.442	55999655	\N	\N	cytoplasm	GO:0005737	iron-sulfur cluster binding	GO:0051536	#N/A	#N/A	Solyc03g111360.2	0	0	0		0.00883918	2.09004	2.09004	ARF2sm-42R up vs wt-42G	0	0	0
Solyc03g113550.2		ARF2sm-42R vs wt-42G diff			ARF2sm-42R up vs wt-42G		ARF2sm-42R up vs wt-42G	Transcription factor bHLH79 (AHRD V1 *-*- BH079_ARATH)													\N	\N	\N	\N	\N	\N	#N/A	#N/A	Solyc03g113550.2	0	0	0		0.00388972	2.6662	2.6662	ARF2sm-42R up vs wt-42G	0	0	0
Solyc03g114320.2		ARF2sm-42R vs wt-42G diff			ARF2sm-42R up vs wt-42G		ARF2sm-42R up vs wt-42G	Kinesin light chain (AHRD V1 ***- B6SPN7_MAIZE)%3B contains Interpro domain(s) IPR0119	at1g27500.1	| symbols: | tetratricopeptide repeat (tpr)-like superfamily protein | chr1:9551629-955	Solyc03g114320.2.1	SL2.40ch03	58383943	58387290	T1130	81.56	58501858	TES0877	78.492	58103558	\N	\N	\N	\N	binding	GO:0005488	#N/A	#N/A	Solyc03g114320.2	0	0	0		7.20154e-05	2.24456	2.24456	ARF2sm-42R up vs wt-42G	0	0	0
Solyc03g114330.2		ARF2sm-42R vs wt-42G diff			ARF2sm-42R up vs wt-42G		ARF2sm-42R up vs wt-42G	Peroxin Pex14 (AHRD V1 *-*- Q9FT86_ARATH)%3B contains Interpro domain(s) IPR006785 Pe	at5g62810.1	| symbols: pex14 atpex14 ped2 | peroxin 14 | chr5:25220323-25223571 forward length=50	Solyc03g114330.2.1	SL2.40ch03	58392328	58397441	T1130	81.56	58501858	TES0877	78.492	58103558	\N	\N	membrane	GO:0016020	\N	\N	#N/A	#N/A	Solyc03g114330.2	0	0	0		0.00564868	2.76302	2.76302	ARF2sm-42R up vs wt-42G	0	0	0
Solyc03g114360.2		ARF2sm-42R vs wt-42G diff			ARF2sm-42R up vs wt-42G		ARF2sm-42R up vs wt-42G	Poly polymerase catalytic domain containing protein expressed (AHRD V1 **-- Q84T80_ORYS	at5g62520.1	| symbols: sro5 | similar to rcd one 5 | chr5:25098071-25099264 forward length=309	Solyc03g114360.2.1	SL2.40ch03	58422049	58424255	T1130	81.56	58501858	TES0877	78.492	58103558	lipid catabolic process	GO:0016042	\N	\N	NAD+ ADP-ribosyltransferase activity	GO:0003950	NA	NAD+ ADP-ribosyltransferase	Solyc03g114360.2	0	0	0		0.00856284	3.60935	3.60935	ARF2sm-42R up vs wt-42G	0	0	0
Solyc03g115220.2		ARF2sm-42R vs wt-42G diff			ARF2sm-42R up vs wt-42G		ARF2sm-42R up vs wt-42G	Cytochrome P450	at5g07990.1	| symbols: tt7 cyp75b1 d501 | cytochrome p450 superfamily protein | chr5:2560437-2562	Solyc03g115220.2.1	SL2.40ch03	59054788	59060217	TGS2288	80.163	59188161	TES1885	84.887	59051912	\N	\N	\N	\N	oxygen binding	GO:0019825	NA	Cytochrome P450	Solyc03g115220.2	0	0	0		0.00936522	3.44241	3.44241	ARF2sm-42R up vs wt-42G	0	0	0
Solyc03g115720.2		ARF2sm-42R vs wt-42G diff			ARF2sm-42R up vs wt-42G		ARF2sm-42R up vs wt-42G	ATP-dependent protease La (LON) domain (AHRD V1 *--- A3YXA7_9SYNE)%3B contains Interpro	at1g18660.1	| symbols: | zinc finger (c3hc4-type ring finger) family protein | chr1:6421433-6425565	Solyc03g115720.2.1	SL2.40ch03	59402193	59411198	T577	87.089	59467468	TES0359	84.022	59218194	proteolysis	GO:0006508	\N	\N	binding zinc ion binding	GO:0005488 GO:0008270	#N/A	#N/A	Solyc03g115720.2	0	0	0		0.000277995	2.24242	2.24242	ARF2sm-42R up vs wt-42G	0	0	0
Solyc03g116460.2		ARF2sm-42R vs wt-42G diff			ARF2sm-42R up vs wt-42G		ARF2sm-42R up vs wt-42G	Aspartate racemase (AHRD V1 ***- D4XDK3_9BURK)%3B contains Interpro domain(s) IPR00192	at1g15410.1	| symbols: | aspartate-glutamate racemase family | chr1:5299577-5300681 forward length=	Solyc03g116460.2.1	SL2.40ch03	59932809	59936469	TES1792	92.316	59966743	TES0731	91.249	59909255	metabolic process	GO:0008152	\N	\N	\N	\N	NA	Aspartate racemase	Solyc03g116460.2	0	0	0		9.49417e-05	2.92576	2.92576	ARF2sm-42R up vs wt-42G	0	0	0
Solyc03g116480.1		ARF2sm-42R vs wt-42G diff			ARF2sm-42R up vs wt-42G		ARF2sm-42R up vs wt-42G	F-box family protein (AHRD V1 **-- B9GZP5_POPTR)%3B contains Interpro domain(s) IPR015	at1g27340.1	| symbols: | galactose oxidase/kelch repeat superfamily protein | chr1:9495741-9497857	Solyc03g116480.1.1	SL2.40ch03	59941068	59942174	TES1792	92.316	59966743	TES0731	91.249	59909255	\N	\N	\N	\N	\N	\N	NA	ubiquitin-protein ligase, putative	Solyc03g116480.1	0	0	0		0.00720093	3.30788	3.30788	ARF2sm-42R up vs wt-42G	0	0	0
Solyc03g116510.1		ARF2sm-42R vs wt-42G diff			ARF2sm-42R up vs wt-42G		ARF2sm-42R up vs wt-42G	Unknown Protein (AHRD V1)	at1g15385.1	| symbols: | unknown protein contains interpro domain/s: protein of unknown function d	Solyc03g116510.1.1	SL2.40ch03	59960022	59960303	TES1792	92.316	59966743	TES0731	91.249	59909255	\N	\N	\N	\N	\N	\N	#N/A	#N/A	Solyc03g116510.1	0	0	0		0.00244596	4.35402	4.35402	ARF2sm-42R up vs wt-42G	0	0	0
Solyc03g116960.2		ARF2sm-42R vs wt-42G diff			ARF2sm-42R up vs wt-42G		ARF2sm-42R up vs wt-42G	Unknown Protein (AHRD V1)													\N	\N	\N	\N	\N	\N	#N/A	#N/A	Solyc03g116960.2	0	0	0		0.00961126	4.18073	4.18073	ARF2sm-42R up vs wt-42G	0	0	0
Solyc03g117600.2		ARF2sm-42R vs wt-42G diff			ARF2sm-42R up vs wt-42G		ARF2sm-42R up vs wt-42G	Hydroxycinnamoyl-CoA shikimate/quinate hydroxycinnamoyltransferase (AHRD V1 **-* A4ZKI0	at5g48930.1	| symbols: hct | hydroxycinnamoyl-coa shikimate/quinate hydroxycinnamoyl transferase |	Solyc03g117600.2.1	SL2.40ch03	60768804	60774201	TGS1442	99.226	60816983	TGS0207	96.573	60740537	\N	\N	\N	\N	shikimate O-hydroxycinnamoyltransferase activity quinate O-hydroxycinnamoyltransferase	GO:0047172 GO:0047205	chlorogenic acid biosynthesis I	hydroxycinnamoyl-CoA:shikimate/quinate hydroxycinnamoyltransferase	Solyc03g117600.2	0	0	0		0.00243518	5.84887	5.84887	ARF2sm-42R up vs wt-42G	0	0	0
Solyc03g117860.2		ARF2sm-42R vs wt-42G diff			ARF2sm-42R up vs wt-42G		ARF2sm-42R up vs wt-42G	IBR finger domain protein (AHRD V1 **-- Q4WL53_ASPFU)%3B contains Interpro domain(s) I	at3g14250.1	| symbols: | ring/u-box superfamily protein | chr3:4745963-4746958 reverse length=303	Solyc03g117860.2.1	SL2.40ch03	60930998	60932206	TES1714	102.975	60983409	TGS0565	101.902	60891320	\N	\N	\N	\N	zinc ion binding	GO:0008270	#N/A	#N/A	Solyc03g117860.2	0	0	0		0.00958117	13.778	13.778	ARF2sm-42R up vs wt-42G	0	0	0
Solyc03g120260.2		ARF2sm-42R vs wt-42G diff			ARF2sm-42R up vs wt-42G		ARF2sm-42R up vs wt-42G	Coatomer beta%26apos subunit (AHRD V1 ***- C4YSS2_CANAW)%3B contains Interpro domain(s)	at1g52360.1	| symbols: | coatomer beta subunit | chr1:19499282-19505397 forward length=926	Solyc03g120260.2.1	SL2.40ch03	62763739	62766058	cLET-5-F17	117.006	62912589	TES1026	112.666	62538280	\N	\N	\N	\N	\N	\N	#N/A	#N/A	Solyc03g120260.2	0	0	0		0.00980764	2.39305	2.39305	ARF2sm-42R up vs wt-42G	0	0	0
Solyc03g120730.2		ARF2sm-42R vs wt-42G diff			ARF2sm-42R up vs wt-42G		ARF2sm-42R up vs wt-42G	Os01g0786800 protein (Fragment) (AHRD V1 ***- Q0JIP0_ORYSJ)%3B contains Interpro domain	at2g25737.1	| symbols: | sulfite exporter taue/safe family protein | chr2:10977174-10979677 forward	Solyc03g120730.2.1	SL2.40ch03	63072823	63076833	TES0023	123.264	63216450	TES0221	118.802	62931852	\N	\N	integral to membrane	GO:0016021	\N	\N	#N/A	#N/A	Solyc03g120730.2	0	0	0		0.00292715	2.20781	2.20781	ARF2sm-42R up vs wt-42G	0	0	0
Solyc03g121210.2		ARF2sm-42R vs wt-42G diff			ARF2sm-42R up vs wt-42G		ARF2sm-42R up vs wt-42G	Mediator of RNA polymerase II transcription subunit 6 (AHRD V1 **** B4K995_DROMO)%3B co	at3g21350.1	| symbols: med6 | rna polymerase transcriptional regulation mediator-related | chr3:751	Solyc03g121210.2.1	SL2.40ch03	63425631	63429474	TES0498	124.995	63480494	T1143	124.126	63410085	\N	\N	\N	\N	transcription coactivator activity	GO:0003713	#N/A	#N/A	Solyc03g121210.2	0	0	0		0.00718716	2.36335	2.36335	ARF2sm-42R up vs wt-42G	0	0	0
Solyc04g005120.2		ARF2sm-42R vs wt-42G diff			ARF2sm-42R up vs wt-42G		ARF2sm-42R up vs wt-42G	Unknown Protein (AHRD V1)	at1g69935.1	| symbols: shw1 | short hypocotyl in white light1 | chr1:26342072-26343082 reverse leng	Solyc04g005120.2.1	SL2.40ch04	85168	88296	TES0030	2.258	1208973	\NA	\NA	\NA	\N	\N	\N	\N	\N	\N	#N/A	#N/A	Solyc04g005120.2	0	0	0		0.00023305	2.2139	2.2139	ARF2sm-42R up vs wt-42G	0	0	0
Solyc04g007470.2		ARF2sm-42R vs wt-42G diff			ARF2sm-42R up vs wt-42G		ARF2sm-42R up vs wt-42G	CONSTANS-like zinc finger protein (AHRD V1 *--- D0EP07_SOYBN)%3B contains Interpro doma	at1g68190.1	| symbols: | b-box zinc finger family protein | chr1:25559384-25561004 forward length=3	Solyc04g007470.2.1	SL2.40ch04	1146534	1149345	TES0030	2.258	1208973	\NA	\NA	\NA	\N	\N	intracellular	GO:0005622	\N	\N	#N/A	#N/A	Solyc04g007470.2	0	0	0		0.0050392	2.23637	2.23637	ARF2sm-42R up vs wt-42G	0	0	0
Solyc04g008210.1		ARF2sm-42R vs wt-42G diff			ARF2sm-42R up vs wt-42G		ARF2sm-42R up vs wt-42G	Xyloglucan endotransglucosylase/hydrolase 13 (AHRD V1 **** C0IRH2_ACTDE)%3B contains In	at2g01850.1	| symbols: exgt-a3 xth27 atxth27 | endoxyloglucan transferase a3 | chr2:385374-387138	Solyc04g008210.1.1	SL2.40ch04	1894160	1896580	CT229	9.377	1955942	TG15	6.403	1686922	\N	\N	\N	\N	xyloglucan:xyloglucosyl transferase activity hydrolase activity, acting on glycosyl bon	GO:0016762 GO:0016798	NA	endoxyloglucan transferase A3	Solyc04g008210.1	0	0	0		3.47475e-05	2.73482	2.73482	ARF2sm-42R up vs wt-42G	0	0	0
Solyc04g009380.1		ARF2sm-42R vs wt-42G diff			ARF2sm-42R up vs wt-42G		ARF2sm-42R up vs wt-42G	Palmitoyltransferase PFA4 (AHRD V1 *-*- B6TA04_MAIZE)%3B contains Interpro domain(s) I	at3g18620.1	| symbols: | dhhc-type zinc finger family protein | chr3:6408849-6410716 forward length	Solyc04g009380.1.1	SL2.40ch04	2807742	2815384	TES1023	19.886	2958114	T741	16.474	2803132	\N	\N	\N	\N	zinc ion binding	GO:0008270	#N/A	#N/A	Solyc04g009380.1	0	0	0		0.00522909	2.21816	2.21816	ARF2sm-42R up vs wt-42G	0	0	0
Solyc04g011570.2		ARF2sm-42R vs wt-42G diff			ARF2sm-42R up vs wt-42G		ARF2sm-42R up vs wt-42G	Zinc finger C3HC4 type family protein (AHRD V1 ***- B6TBG5_MAIZE)%3B contains Interpro	at2g22120.2	| symbols: | ring/fyve/phd zinc finger superfamily protein | chr2:9394026-9396979 forwa	Solyc04g011570.2.1	SL2.40ch04	3992355	3997255	TES0968	24.48	4203211	T703	23.737	3964806	\N	\N	\N	\N	protein binding	GO:0005515	#N/A	#N/A	Solyc04g011570.2	0	0	0		0.000739928	2.01351	2.01351	ARF2sm-42R up vs wt-42G	0	0	0
Solyc04g015150.2		ARF2sm-42R vs wt-42G diff			ARF2sm-42R up vs wt-42G		ARF2sm-42R up vs wt-42G	Phosphoglycolate phosphatase (AHRD V1 **-* C1FHY2_9CHLO)%3B contains Interpro domain(s)	at5g47760.1	| symbols: pglp2 atpglp2 atpk5 | 2-phosphoglycolate phosphatase 2 | chr5:19343121-193	Solyc04g015150.2.1	SL2.40ch04	5322712	5328505	T891	38.81	5477845	TES1141	29.566	4960482	\N	\N	\N	\N	4-nitrophenylphosphatase activity phosphoglycolate phosphatase activity	GO:0003869 GO:0008967	NA	phosphoglycolate phosphatase	Solyc04g015150.2	0	0	0		5.43539e-06	2.23731	2.23731	ARF2sm-42R up vs wt-42G	0	0	0
Solyc04g015530.1		ARF2sm-42R vs wt-42G diff			ARF2sm-42R up vs wt-42G		ARF2sm-42R up vs wt-42G	Polygalacturonase A (AHRD V1 **** Q9M6S2_ACTCH)%3B contains Interpro domain(s) IPR0004	at3g57510.1	| symbols: adpg1 | pectin lyase-like superfamily protein | chr3:21283546-21285842 rever	Solyc04g015530.1.1	SL2.40ch04	5756603	5764191	T635	35.778	6035105	TGS0283	34.082	5731721	\N	\N	\N	\N	polygalacturonase activity	GO:0004650	homogalacturonan degradation	Polygalacturonase	Solyc04g015530.1	0	0	0		3.9715e-05	3.81317	3.81317	ARF2sm-42R up vs wt-42G	0	0	0
Solyc04g016470.2		ARF2sm-42R vs wt-42G diff			ARF2sm-42R up vs wt-42G		ARF2sm-42R up vs wt-42G	Beta-1 3-glucanase (AHRD V1 ***- B2ZP01_VITRI)%3B contains Interpro domain(s) IPR00049	at3g57260.1	| symbols: bgl2 pr2 bg2 pr-2 | beta-1 3-glucanase 2 | chr3:21188709-21189822 reverse	Solyc04g016470.2.1	SL2.40ch04	7303341	7305043	tma0303	37.614	8336522	TGS2944	37.651	7185572	\N	\N	\N	\N	cellulase activity	GO:0008810	NA	glucan 1,3-beta-glucosidase	Solyc04g016470.2	0	0	0		0.00431499	3.88052	3.88052	ARF2sm-42R up vs wt-42G	0	0	0
Solyc04g024420.2		ARF2sm-42R vs wt-42G diff			ARF2sm-42R up vs wt-42G		ARF2sm-42R up vs wt-42G	Proteasome subunit beta type (AHRD V1 ***- A9PCK6_POPTR)%3B contains Interpro domain(s)	at5g40580.2	| symbols: pbb2 | 20s proteasome beta subunit pbb2 | chr5:16248511-16250451 reverse len	Solyc04g024420.2.1	SL2.40ch04	11945503	11951273	TGS2258	37.734	13216320	TGS2379	31.331	10719297	\N	\N	proteasome core complex proteasome core complex	GO:0005839 GO:0005839	\N	\N	NA	Proteasome subunit beta type	Solyc04g024420.2	0	0	0		0.000163088	2.36107	2.36107	ARF2sm-42R up vs wt-42G	0	0	0
Solyc04g049350.2		ARF2sm-42R vs wt-42G diff			ARF2sm-42R up vs wt-42G		ARF2sm-42R up vs wt-42G	Chorismate synthase (AHRD V1 **** A5APN1_VITVI)%3B contains Interpro domain(s) IPR0004	at1g48850.1	| symbols: emb1144 | chorismate synthase putative / 5-enolpyruvylshikimate-3-phosphate	Solyc04g049350.2.1	SL2.40ch04	40676150	40683840	tme0078	36.968	41915928	TGS0580	38.022	40674063	\N	\N	\N	\N	flavin reductase activity chorismate synthase activity	GO:0042602 GO:0004107	chorismate biosynthesis	chorismate synthase	Solyc04g049350.2	0	0	0		0.000845872	2.11087	2.11087	ARF2sm-42R up vs wt-42G	0	0	0
Solyc04g049360.2		ARF2sm-42R vs wt-42G diff			ARF2sm-42R up vs wt-42G		ARF2sm-42R up vs wt-42G	4-amino-4-deoxychorismate synthase component I (AHRD V1 **** D9W9C0_STRHY)%3B contains	at2g28880.1	| symbols: emb1997 adcs | para-aminobenzoate (paba) synthase family protein | chr2:123	Solyc04g049360.2.1	SL2.40ch04	40766130	40778394	tme0078	36.968	41915928	TGS0580	38.022	40674063	\N	\N	\N	\N	4-amino-4-deoxychorismate synthase activity protein binding	GO:0046820 GO:0005515	tetrahydrofolate biosynthesis II	oxo-acid-lyase//anthranilate synthase	Solyc04g049360.2	0	0	0		0.00171597	2.28414	2.28414	ARF2sm-42R up vs wt-42G	0	0	0
Solyc04g054830.2		ARF2sm-42R vs wt-42G diff			ARF2sm-42R up vs wt-42G		ARF2sm-42R up vs wt-42G	Inositol-1 4 5-trisphosphate 5-phosphatase-like protein (AHRD V1 ***- Q9FJQ6_ARATH)%3B	at5g65090.1	| symbols: mrh3 bst1 der4 | dnase i-like superfamily protein | chr5:26004282-26006656	Solyc04g054830.2.1	SL2.40ch04	52445213	52449024	CT258	44.627	52555626	C2_At1g05055	42.855	52220265	\N	\N	\N	\N	inositol or phosphatidylinositol phosphatase activity	GO:0004437	NA	bristled-like protein	Solyc04g054830.2	0	0	0		0.00194493	2.77	2.77	ARF2sm-42R up vs wt-42G	0	0	0
Solyc04g056610.2		ARF2sm-42R vs wt-42G diff			ARF2sm-42R up vs wt-42G		ARF2sm-42R up vs wt-42G	Genomic DNA chromosome 5 P1 clone MDF20 (AHRD V1 ***- Q9FM77_ARATH)	at5g55610.1	| symbols: | unknown protein located in: mitochondrion chloroplast plastid membrane	Solyc04g056610.2.1	SL2.40ch04	53730127	53737736	T877	50.486	54502141	TGS3254	43.434	53705574	\N	\N	\N	\N	\N	\N	#N/A	#N/A	Solyc04g056610.2	0	0	0		0.000114883	2.00648	2.00648	ARF2sm-42R up vs wt-42G	0	0	0
Solyc04g074190.2		ARF2sm-42R vs wt-42G diff			ARF2sm-42R up vs wt-42G		ARF2sm-42R up vs wt-42G	Protein phosphatase 2C-like (AHRD V1 ***- A2Q6E4_MEDTR)%3B contains Interpro domain(s)	at1g34750.1	| symbols: | protein phosphatase 2c family protein | chr1:12736386-12737727 reverse len	Solyc04g074190.2.1	SL2.40ch04	57784113	57790407	TEI0139	65.553	57815082	T737	63.473	57657494	\N	\N	\N	\N	catalytic activity	GO:0003824	NA	protein phosphatase 2c, putative	Solyc04g074190.2	0	0	0		0.00287803	3.5122	3.5122	ARF2sm-42R up vs wt-42G	0	0	0
Solyc04g074350.2		ARF2sm-42R vs wt-42G diff			ARF2sm-42R up vs wt-42G		ARF2sm-42R up vs wt-42G	UDP-glucuronosyltransferase (AHRD V1 **-* Q5UB81_ARATH)%3B contains Interpro domain(s)	at1g22400.1	| symbols: ugt85a1 atugt85a1 | udp-glycosyltransferase superfamily protein | chr1:7903	Solyc04g074350.2.1	SL2.40ch04	57939931	57941710	TES1809	65.328	58124020	T1232	66.074	57874171	\N	\N	\N	\N	glucuronosyltransferase activity	GO:0015020	NA	glucuronosyltransferase	Solyc04g074350.2	0	0	0		0.00385801	4.14851	4.14851	ARF2sm-42R up vs wt-42G	0	0	0
Solyc04g077360.2		ARF2sm-42R vs wt-42G diff			ARF2sm-42R up vs wt-42G		ARF2sm-42R up vs wt-42G	Serine/threonine-protein kinase receptor (AHRD V1 **** B6U2B7_MAIZE)%3B contains Interp	at4g21380.1	| symbols: ark3 rk3 | receptor kinase 3 | chr4:11389219-11393090 reverse length=850 |	Solyc04g077360.2.1	SL2.40ch04	59879181	59882240	TES1364	81.073	59895880	TGS2285	78.892	59850097	\N	\N	\N	\N	transmembrane receptor protein kinase activity protein serine/threonine kinase activity	GO:0019199 GO:0004674	NA	Serine/threonine-protein kinase receptor	Solyc04g077360.2	0	0	0		0.00974634	4.90155	4.90155	ARF2sm-42R up vs wt-42G	0	0	0
Solyc04g077860.2		ARF2sm-42R vs wt-42G diff			ARF2sm-42R up vs wt-42G		ARF2sm-42R up vs wt-42G	Hydrolase alpha/beta fold family protein expressed (AHRD V1 **** Q10J20_ORYSJ)%3B conta	at3g03990.1	| symbols: | alpha/beta-hydrolases superfamily protein | chr3:1033788-1034591 forward l	Solyc04g077860.2.1	SL2.40ch04	60335672	60337954	T708	85.846	60509821	TES0098	84.183	60219232	\N	\N	\N	\N	hydrolase activity	GO:0016787	#N/A	#N/A	Solyc04g077860.2	0	0	0		0.000217354	6.48575	6.48575	ARF2sm-42R up vs wt-42G	0	0	0
Solyc04g077920.2		ARF2sm-42R vs wt-42G diff			ARF2sm-42R up vs wt-42G		ARF2sm-42R up vs wt-42G	Interferon-related developmental regulator family protein (AHRD V1 ***- B4FQN7_MAIZE)%3	at1g27760.3	| symbols: sat32 atsat32 | interferon-related developmental regulator family protein /	Solyc04g077920.2.1	SL2.40ch04	60371506	60376316	T708	85.846	60509821	TES0098	84.183	60219232	\N	\N	\N	\N	binding	GO:0005488	#N/A	#N/A	Solyc04g077920.2	0	0	0		0.000344696	2.20345	2.20345	ARF2sm-42R up vs wt-42G	0	0	0
Solyc04g079280.2		ARF2sm-42R vs wt-42G diff			ARF2sm-42R up vs wt-42G		ARF2sm-42R up vs wt-42G	LipA and NB-ARC domain protein (AHRD V1 *--- B8NDK8_ASPFN)%3B contains Interpro domain(	at4g34310.1	| symbols: | alpha/beta-hydrolases superfamily protein | chr4:16414113-16419542 forward	Solyc04g079280.2.1	SL2.40ch04	61384114	61390904	TG443	95.421	61414081	TGS1157	90.883	61030085	\N	\N	\N	\N	binding	GO:0005488	#N/A	#N/A	Solyc04g079280.2	0	0	0		0.000663935	2.11587	2.11587	ARF2sm-42R up vs wt-42G	0	0	0
Solyc04g080990.1		ARF2sm-42R vs wt-42G diff			ARF2sm-42R up vs wt-42G		ARF2sm-42R up vs wt-42G	C4-dicarboxylate transporter/malic acid transport family protein (AHRD V1 ***- D7KUS7_A	at1g62280.1	| symbols: slah1 | slac1 homologue 1 | chr1:23007309-23008540 reverse length=385	Solyc04g080990.1.1	SL2.40ch04	62645844	62647955	TES0995	115.567	62734472	CT173	116.936	62612197	\N	\N	integral to membrane	GO:0016021	\N	\N	#N/A	#N/A	Solyc04g080990.1	0	0	0		1.17293e-05	2.64134	2.64134	ARF2sm-42R up vs wt-42G	0	0	0
Solyc04g081670.2		ARF2sm-42R vs wt-42G diff			ARF2sm-42R up vs wt-42G		ARF2sm-42R up vs wt-42G	Vacuolar processing enzyme-3 (AHRD V1 **-- Q852T0_TOBAC)%3B contains Interpro domain(s)													proteolysis	GO:0006508	\N	\N	\N	\N	#N/A	#N/A	Solyc04g081670.2	0	0	0		0.00398815	2.67345	2.67345	ARF2sm-42R up vs wt-42G	0	0	0
Solyc04g081890.1		ARF2sm-42R vs wt-42G diff			ARF2sm-42R up vs wt-42G		ARF2sm-42R up vs wt-42G	Ring H2 finger protein (AHRD V1 *-*- D9ZHD8_HYPPE)%3B contains Interpro domain(s) IPR0	at5g42200.1	| symbols: | ring/u-box superfamily protein | chr5:16860523-16861014 forward length=163	Solyc04g081890.1.1	SL2.40ch04	63347131	63347535	TM31	132.328	63419051	T1122	121.595	63120868	\N	\N	\N	\N	ubiquitin-protein ligase activity	GO:0004842	NA	ubiquitin-protein ligase	Solyc04g081890.1	0	0	0		0.00176898	6.56112	6.56112	ARF2sm-42R up vs wt-42G	0	0	0
Solyc04g083150.1		ARF2sm-42R vs wt-42G diff			ARF2sm-42R up vs wt-42G		ARF2sm-42R up vs wt-42G	cytochrome P450	at4g36220.1	| symbols: fah1 cyp84a1 | ferulic acid 5-hydroxylase 1 | chr4:17137584-17139619 revers	Solyc04g083150.1.1	SL2.40ch04	54071692	54074344	T877	50.486	54502141	TGS3254	43.434	53705574	\N	\N	\N	\N	oxygen binding	GO:0019825	NA	cytochrome P450	Solyc04g083150.1	0	0	0		0.00352652	2.55938	2.55938	ARF2sm-42R up vs wt-42G	0	0	0
Solyc05g005290.2		ARF2sm-42R vs wt-42G diff			ARF2sm-42R up vs wt-42G		ARF2sm-42R up vs wt-42G	Poly polymerase catalytic domain containing protein expressed (AHRD V1 **-- Q84T80_ORYS													\N	\N	\N	\N	NAD+ ADP-ribosyltransferase activity	GO:0003950	NA	NAD+ ADP-ribosyltransferase	Solyc05g005290.2	0	0	0		0.00711795	6.70292	6.70292	ARF2sm-42R up vs wt-42G	0	0	0
Solyc05g006090.2		ARF2sm-42R vs wt-42G diff			ARF2sm-42R up vs wt-42G		ARF2sm-42R up vs wt-42G	Phosphoglycerate mutase (AHRD V1 *--- A4TBN9_MYCGI)%3B contains Interpro domain(s) IPR	at1g24090.1	| symbols: | rnase h family protein | chr1:8520834-8522737 forward length=353 | symbols	Solyc05g006090.2.1	SL2.40ch05	818986	824063	TGS1036	7.624	906633	TES1770	5.982	818950	\N	\N	\N	\N	nucleic acid binding ribonuclease H activity	GO:0003676 GO:0004523	NA	ribonuclease H	Solyc05g006090.2	0	0	0		0.00182124	2.0585	2.0585	ARF2sm-42R up vs wt-42G	0	0	0
Solyc05g006810.2		ARF2sm-42R vs wt-42G diff			ARF2sm-42R up vs wt-42G		ARF2sm-42R up vs wt-42G	FAD-binding monooxygenase PheA/TfdB family (AHRD V1 ***- A9GSW2_SORC5)%3B contains Inte	at1g24340.1	| symbols: emb260 emb2421 | fad/nad(p)-binding oxidoreductase family protein | chr1:86	Solyc05g006810.2.1	SL2.40ch05	1420716	1427230	TES0363	15.307	1540417	TEI0177	9.604	1041368	oxidation-reduction process metabolic process	GO:0055114 GO:0008152	\N	\N	\N	\N	#N/A	#N/A	Solyc05g006810.2	0	0	0		0.00432503	2.28378	2.28378	ARF2sm-42R up vs wt-42G	0	0	0
Solyc05g007010.1		ARF2sm-42R vs wt-42G diff			ARF2sm-42R up vs wt-42G		ARF2sm-42R up vs wt-42G	Glyoxal oxidase (AHRD V1 ***- B6TJK4_MAIZE)%3B contains Interpro domain(s) IPR009880	at1g14430.1	| symbols: | glyoxal oxidase-related protein | chr1:4934359-4936053 forward length=564	Solyc05g007010.1.1	SL2.40ch05	1601748	1603568	TEI0145	18.17	1646781	TES0363	15.307	1540417	\N	\N	\N	\N	\N	\N	#N/A	#N/A	Solyc05g007010.1	0	0	0		0.00260985	2.11427	2.11427	ARF2sm-42R up vs wt-42G	0	0	0
Solyc05g008200.2		ARF2sm-42R vs wt-42G diff			ARF2sm-42R up vs wt-42G		ARF2sm-42R up vs wt-42G	Phosphatidylinositol-4-phosphate 5-kinase family protein (AHRD V1 *--- D7L328_ARALY)%3B	at1g71010.1	| symbols: fab1c | forms aploid and binucleate cells 1c | chr1:26782839-26788712 forwar	Solyc05g008200.2.1	SL2.40ch05	2590255	2598199	TES0012	32.87	2615675	TGS1457	31.477	2300661	phosphatidylinositol metabolic process cellular protein metabolic process	GO:0046488 GO:0044267	\N	\N	zinc ion binding	GO:0008270	NA	Phosphatidylinositol-4-phosphate 5-kinase family protein	Solyc05g008200.2	0	0	0		9.10647e-05	2.25652	2.25652	ARF2sm-42R up vs wt-42G	0	0	0
Solyc05g008390.2		ARF2sm-42R vs wt-42G diff			ARF2sm-42R up vs wt-42G		ARF2sm-42R up vs wt-42G	RING zinc finger-containing protein (AHRD V1 *--- Q54MR8_DICDI)%3B contains Interpro do	at2g01275.2	| symbols: | ring/fyve/phd zinc finger superfamily protein | chr2:142610-143809 reverse	Solyc05g008390.2.1	SL2.40ch05	2756559	2760072	TGS1360	41.343	2990999	SSR115	36.668	2732513	\N	\N	\N	\N	protein binding	GO:0005515	#N/A	#N/A	Solyc05g008390.2	0	0	0		0.00472918	2.10581	2.10581	ARF2sm-42R up vs wt-42G	0	0	0
Solyc05g008510.2		ARF2sm-42R vs wt-42G diff			ARF2sm-42R up vs wt-42G		ARF2sm-42R up vs wt-42G	Multidrug resistance protein mdtK (AHRD V1 ***- MDTK_EDWI9)%3B contains Interpro domain	at1g15170.1	| symbols: | mate efflux family protein | chr1:5220690-5222756 forward length=481 | sym	Solyc05g008510.2.1	SL2.40ch05	2849561	2853572	TGS1360	41.343	2990999	SSR115	36.668	2732513	\N	\N	\N	\N	\N	\N	NA	Multidrug resistance protein mdtK	Solyc05g008510.2	0	0	0		0.00526257	2.21163	2.21163	ARF2sm-42R up vs wt-42G	0	0	0
Solyc05g008630.2		ARF2sm-42R vs wt-42G diff			ARF2sm-42R up vs wt-42G		ARF2sm-42R up vs wt-42G	Poly(A) polymerase (AHRD V1 ***- D7M9N5_ARALY)%3B contains Interpro domain(s) IPR01449	at1g17980.1	| symbols: paps1 | poly(a) polymerase 1 | chr1:6187742-6191418 reverse length=713	Solyc05g008630.2.1	SL2.40ch05	2934132	2942578	TGS1360	41.343	2990999	SSR115	36.668	2732513	\N	\N	\N	\N	protein binding	GO:0005515	NA	Poly(A) polymerase	Solyc05g008630.2	0	0	0		0.000302827	2.06859	2.06859	ARF2sm-42R up vs wt-42G	0	0	0
Solyc05g009020.2		ARF2sm-42R vs wt-42G diff			ARF2sm-42R up vs wt-42G		ARF2sm-42R up vs wt-42G	Mitochondrial carrier like protein (AHRD V1 ***- Q4A3J5_ARATH)%3B contains Interpro dom	at1g25380.1	| symbols: atndt2 ndt2 | nad+ transporter 2 | chr1:8903726-8905818 forward length=363	Solyc05g009020.2.1	SL2.40ch05	3185966	3192366	TES0534	43.407	3198272	TGS1360	41.343	2990999	\N	\N	\N	\N	NAD transporter activity	GO:0051724	#N/A	#N/A	Solyc05g009020.2	0	0	0		0.00286321	2.03418	2.03418	ARF2sm-42R up vs wt-42G	0	0	0
Solyc05g009140.2		ARF2sm-42R vs wt-42G diff			ARF2sm-42R up vs wt-42G		ARF2sm-42R up vs wt-42G	Beta-lactamase domain protein (AHRD V1 *-*- D2RPF9_HALTV)%3B contains Interpro domain(s	at1g25375.1	| symbols: | metallo-hydrolase/oxidoreductase superfamily protein | chr1:8900279-890322	Solyc05g009140.2.1	SL2.40ch05	3254932	3264160	TES0510	44.959	3621403	TES1325	42.535	3247709	\N	\N	\N	\N	hydrolase activity	GO:0016787	#N/A	#N/A	Solyc05g009140.2	0	0	0		0.00234025	2.25339	2.25339	ARF2sm-42R up vs wt-42G	0	0	0
Solyc05g010420.1		ARF2sm-42R vs wt-42G diff			ARF2sm-42R up vs wt-42G		ARF2sm-42R up vs wt-42G	S-adenosylmethionine decarboxylase proenzyme (AHRD V1 **** Q7XZQ9_VITVI)%3B contains In	at3g25570.2	| symbols: | adenosylmethionine decarboxylase family protein | chr3:9287413-9288462 rev	Solyc05g010420.1.1	SL2.40ch05	4654381	4655463	TEI0467	65.77	4989082	CT93	61.444	4654243	\N	\N	\N	\N	adenosylmethionine decarboxylase activity	GO:0004014	spermine biosynthesis	adenosylmethionine decarboxylase	Solyc05g010420.1	0	0	0		4.93103e-05	2.10669	2.10669	ARF2sm-42R up vs wt-42G	0	0	0
Solyc05g011970.2		ARF2sm-42R vs wt-42G diff			ARF2sm-42R up vs wt-42G		ARF2sm-42R up vs wt-42G	Cytochrome P450	at2g26710.1	| symbols: bas1 cyp734a1 cyp72b1 | cytochrome p450 superfamily protein | chr2:1138070	Solyc05g011970.2.1	SL2.40ch05	5179822	5182337	TES1230	69.729	5228052	TGS1499	63.975	4990974	\N	\N	\N	\N	oxygen binding	GO:0019825	NA	Cytochrome P450	Solyc05g011970.2	0	0	0		0.00931291	4.02909	4.02909	ARF2sm-42R up vs wt-42G	0	0	0
Solyc05g013170.2		ARF2sm-42R vs wt-42G diff			ARF2sm-42R up vs wt-42G		ARF2sm-42R up vs wt-42G	Unknown Protein (AHRD V1)%3B contains Interpro domain(s) IPR012891 GCK	at1g14060.1	| symbols: | gck domain-containing protein | chr1:4817354-4817893 reverse length=179	Solyc05g013170.2.1	SL2.40ch05	6254353	6256562	TGS3224	73.38	6306353	TGS0639	74.023	6226663	\N	\N	\N	\N	\N	\N	#N/A	#N/A	Solyc05g013170.2	0	0	0		0.00338653	2.02164	2.02164	ARF2sm-42R up vs wt-42G	0	0	0
Solyc05g013630.1		ARF2sm-42R vs wt-42G diff			ARF2sm-42R up vs wt-42G		ARF2sm-42R up vs wt-42G	Unknown protein (Fragment) (AHRD V1 ***- Q43520_SOLLC)	at4g33930.1	| symbols: | cupredoxin superfamily protein | chr4:16264389-16265420 reverse length=343	Solyc05g013630.1.1	SL2.40ch05	6934325	6934771	T40	77.968	7498030	TGS3224	73.38	6306353	\N	\N	\N	\N	\N	\N	#N/A	#N/A	Solyc05g013630.1	0	0	0		0.00309756	3.2134	3.2134	ARF2sm-42R up vs wt-42G	0	0	0
Solyc05g013710.2		ARF2sm-42R vs wt-42G diff			ARF2sm-42R up vs wt-42G		ARF2sm-42R up vs wt-42G	Cysteine desulfuration protein SufE (AHRD V1 *-*- Q2RNM6_RHORT)%3B contains Interpro do	at1g67810.1	| symbols: sufe2 | sulfur e2 | chr1:25426488-25427264 forward length=258	Solyc05g013710.2.1	SL2.40ch05	7010701	7013932	T40	77.968	7498030	TGS3224	73.38	6306353	\N	\N	\N	\N	enzyme activator activity	GO:0008047	#N/A	#N/A	Solyc05g013710.2	0	0	0		0.00859154	5.26067	5.26067	ARF2sm-42R up vs wt-42G	0	0	0
Solyc05g015060.2		ARF2sm-42R vs wt-42G diff			ARF2sm-42R up vs wt-42G		ARF2sm-42R up vs wt-42G	26S protease regulatory subunit 6B homolog (AHRD V1 *--- PRS6B_YEAST)%3B contains Inter	at3g50940.1	| symbols: | p-loop containing nucleoside triphosphate hydrolases superfamily protein |	Solyc05g015060.2.1	SL2.40ch05	9773362	9775130	TG504	80.949	10065276	TGS3302	81.405	9299141	\N	\N	\N	\N	ATPase activity	GO:0016887	#N/A	#N/A	Solyc05g015060.2	0	0	0		0.00695297	6.83664	6.83664	ARF2sm-42R up vs wt-42G	0	0	0
Solyc05g024260.2		ARF2sm-42R vs wt-42G diff			ARF2sm-42R up vs wt-42G		ARF2sm-42R up vs wt-42G	RAG1-activating protein 1 homolog (AHRD V1 **-- R1AP1_DANRE)%3B contains Interpro domai	at5g23660.1	| symbols: mtn3 sweet12 atsweet12 | homolog of medicago truncatula mtn3 | chr5:797193	Solyc05g024260.2.1	SL2.40ch05	30963570	30966033	TGS1557	76.924	31938520	tma0094	81.241	30863278	\N	\N	integral to membrane	GO:0016021	\N	\N	#N/A	#N/A	Solyc05g024260.2	0	0	0		0.000230307	8.05349	8.05349	ARF2sm-42R up vs wt-42G	0	0	0
Solyc05g046120.2		ARF2sm-42R vs wt-42G diff			ARF2sm-42R up vs wt-42G		ARF2sm-42R up vs wt-42G	Formin 3 (AHRD V1 *-*- D0QAN4_ARATH)%3B contains Interpro domain(s) IPR015425 Actin-b	at5g54650.2	| symbols: fh5 atfh5 | formin homology5 | chr5:22197856-22201649 reverse length=900	Solyc05g046120.2.1	SL2.40ch05	57402599	57408915	TES0804	83.038	57666420	tma0252	78.446	56504709	actin cytoskeleton organization	GO:0030036	\N	\N	\N	\N	#N/A	#N/A	Solyc05g046120.2	0	0	0		0.00210502	2.7137	2.7137	ARF2sm-42R up vs wt-42G	0	0	0
Solyc05g049980.2		ARF2sm-42R vs wt-42G diff			ARF2sm-42R up vs wt-42G		ARF2sm-42R up vs wt-42G	Glycoside hydrolase family 28 protein/polygalacturonase family protein (AHRD V1 **-- Q1	at3g61490.3	| symbols: | pectin lyase-like superfamily protein | chr3:22758439-22760137 forward len	Solyc05g049980.2.1	SL2.40ch05	58969697	58973289	TES2006	86.212	59591573	TEI0186	84.818	58968874	carbohydrate metabolic process	GO:0005975	\N	\N	\N	\N	homogalacturonan degradation	Probable polygalacturonase	Solyc05g049980.2	0	0	0		0.00168336	4.13651	4.13651	ARF2sm-42R up vs wt-42G	0	0	0
Solyc05g050220.2		ARF2sm-42R vs wt-42G diff			ARF2sm-42R up vs wt-42G		ARF2sm-42R up vs wt-42G	G-box binding factor 3 (AHRD V1 **** D7LDY1_ARALY)%3B contains Interpro domain(s) IPR0	at2g46270.1	| symbols: gbf3 | g-box binding factor 3 | chr2:19000859-19002901 forward length=382	Solyc05g050220.2.1	SL2.40ch05	59415665	59420568	TES2006	86.212	59591573	TEI0186	84.818	58968874	\N	\N	\N	\N	sequence-specific DNA binding	GO:0043565	#N/A	#N/A	Solyc05g050220.2	0	0	0		0.00685506	3.55714	3.55714	ARF2sm-42R up vs wt-42G	0	0	0
Solyc05g050740.2		ARF2sm-42R vs wt-42G diff			ARF2sm-42R up vs wt-42G		ARF2sm-42R up vs wt-42G	Unknown Protein (AHRD V1)	none	none	Solyc05g050740.2.1	SL2.40ch05	60018960	60028258	TGS0914	78.729	60218721	TG318	85.245	59916704	\N	\N	\N	\N	\N	\N	#N/A	#N/A	Solyc05g050740.2	0	0	0		0.00565745	2.49004	2.49004	ARF2sm-42R up vs wt-42G	0	0	0
Solyc05g051190.1		ARF2sm-42R vs wt-42G diff			ARF2sm-42R up vs wt-42G		ARF2sm-42R up vs wt-42G	Salt tolerance protein 5-like protein (AHRD V1 *-*- Q38HV0_SOLTU)%3B contains Interpro	at4g27890.1	| symbols: | hsp20-like chaperones superfamily protein | chr4:13886033-13887220 forward	Solyc05g051190.1.1	SL2.40ch05	60582881	60583473	TES0069	92.099	60588659	TES0103	89.027	60392798	\N	\N	\N	\N	\N	\N	#N/A	#N/A	Solyc05g051190.1	0	0	0		0.00349932	2.1287	2.1287	ARF2sm-42R up vs wt-42G	0	0	0
Solyc05g051200.1		ARF2sm-42R vs wt-42G diff			ARF2sm-42R up vs wt-42G		ARF2sm-42R up vs wt-42G	Ethylene-responsive transcription factor 1A (AHRD V1 *-** A9P6A4_MEDTR)%3B contains Int	at3g23240.1	| symbols: erf1 aterf1 | ethylene response factor 1 | chr3:8295705-8296361 forward len	Solyc05g051200.1.1	SL2.40ch05	60588307	60588981	TES0358	89.167	60958800	TES0103	89.027	60392798	\N	\N	\N	\N	sequence-specific DNA binding transcription factor activity	GO:0003700	#N/A	#N/A	Solyc05g051200.1	0	0	0		0.00100153	2.88988	2.88988	ARF2sm-42R up vs wt-42G	0	0	0
Solyc05g051220.2		ARF2sm-42R vs wt-42G diff			ARF2sm-42R up vs wt-42G		ARF2sm-42R up vs wt-42G	Potassium channel (AHRD V1 **** D0EM91_9ROSI)%3B contains Interpro domain(s) IPR002110	at3g02850.1	| symbols: skor | stelar k+ outward rectifier | chr3:619701-623473 reverse length=828	Solyc05g051220.2.1	SL2.40ch05	60621366	60632925	TES0358	89.167	60958800	TES0069	92.099	60588659	\N	\N	\N	\N	inward rectifier potassium channel activity	GO:0005242	#N/A	#N/A	Solyc05g051220.2	0	0	0		0.00531854	3.36834	3.36834	ARF2sm-42R up vs wt-42G	0	0	0
Solyc05g051900.2		ARF2sm-42R vs wt-42G diff			ARF2sm-42R up vs wt-42G		ARF2sm-42R up vs wt-42G	Major facilitator superfamily (MFS_1) transporter (AHRD V1 *--- Q392L2_BURS3)%3B contai	at1g78130.1	| symbols: une2 | major facilitator superfamily protein | chr1:29400171-29401814 forwar	Solyc05g051900.2.1	SL2.40ch05	61442000	61445024	TES1044	99.868	61660779	TES0454	91.553	61423352	\N	\N	\N	\N	sugar:hydrogen symporter activity	GO:0005351	#N/A	#N/A	Solyc05g051900.2	0	0	0		0.00613196	2.34054	2.34054	ARF2sm-42R up vs wt-42G	0	0	0
Solyc05g052410.1		ARF2sm-42R vs wt-42G diff			ARF2sm-42R up vs wt-42G		ARF2sm-42R up vs wt-42G	Ethylene-responsive transcription factor 1 (AHRD V1 *-** ERF1_ORYSJ)%3B contains Interp	at5g05410.1	| symbols: dreb2a dreb2 | dre-binding protein 2a | chr5:1602650-1603657 forward length	Solyc05g052410.1.1	SL2.40ch05	61781895	61783094	CT172	107.488	62108681	T1746	97.215	61708360	\N	\N	\N	\N	\N	\N	#N/A	#N/A	Solyc05g052410.1	0	0	0		0.00348514	3.35029	3.35029	ARF2sm-42R up vs wt-42G	0	0	0
Solyc05g053000.1		ARF2sm-42R vs wt-42G diff			ARF2sm-42R up vs wt-42G		ARF2sm-42R up vs wt-42G	AT-hook DNA-binding protein (Fragment) (AHRD V1 **-* A1DR81_CATRO)%3B contains Interpro	at3g55560.1	| symbols: agf2 ahl15 | at-hook protein of ga feedback 2 | chr3:20604904-20605836 reve	Solyc05g053000.1.1	SL2.40ch05	62313115	62314056	TES1594	112.752	62355100	TES1750	110.195	62296354	\N	\N	\N	\N	AT DNA binding	GO:0003680	#N/A	#N/A	Solyc05g053000.1	0	0	0		0.00291334	3.54583	3.54583	ARF2sm-42R up vs wt-42G	0	0	0
Solyc05g053300.2		ARF2sm-42R vs wt-42G diff			ARF2sm-42R up vs wt-42G		ARF2sm-42R up vs wt-42G	Dihydrolipoyl dehydrogenase (AHRD V1 ***- Q8GT30_SOLLC)%3B contains Interpro domain(s)	at1g48030.2	| symbols: mtlpd1 | mitochondrial lipoamide dehydrogenase 1 | chr1:17717432-17719141 re	Solyc05g053300.2.1	SL2.40ch05	62572547	62577624	C2_At5g49510	114.67	62638676	TEI0061	111.332	62495111	\N	\N	\N	\N	protein binding	GO:0005515	2-ketoglutarate dehydrogenase complex	mitochondrial lipoamide dehydrogenase 1	Solyc05g053300.2	0	0	0		0.000613424	2.18759	2.18759	ARF2sm-42R up vs wt-42G	0	0	0
Solyc05g053330.2		ARF2sm-42R vs wt-42G diff			ARF2sm-42R up vs wt-42G		ARF2sm-42R up vs wt-42G	MYB transcription factor (AHRD V1 ***- Q39550_CRAPL)%3B contains Interpro domain(s) IP	at3g06490.1	| symbols: myb108 atmyb108 bos1 | myb domain protein 108 | chr3:2004298-2006358 forwa	Solyc05g053330.2.1	SL2.40ch05	62594925	62596759	C2_At5g49510	114.67	62638676	TEI0061	111.332	62495111	\N	\N	\N	\N	DNA binding	GO:0003677	#N/A	#N/A	Solyc05g053330.2	0	0	0		0.000451015	2.29008	2.29008	ARF2sm-42R up vs wt-42G	0	0	0
Solyc05g053490.2		ARF2sm-42R vs wt-42G diff			ARF2sm-42R up vs wt-42G		ARF2sm-42R up vs wt-42G	Beta-1%2C3-galactosyl-O-glycosyl-glycoprotein beta-1%2C6-N-acetylglucosaminyltransferas	at3g24040.1	| symbols: | core-2/i-branching beta-1 6-n-acetylglucosaminyltransferase family protein	Solyc05g053490.2.1	SL2.40ch05	62715754	62721624	TES1838	119.266	62867839	C2_At5g49510	114.67	62638676	\N	\N	\N	\N	transferase activity, transferring glycosyl groups	GO:0016757	#N/A	#N/A	Solyc05g053490.2	0	0	0		6.91887e-05	2.24731	2.24731	ARF2sm-42R up vs wt-42G	0	0	0
Solyc05g053760.2		ARF2sm-42R vs wt-42G diff			ARF2sm-42R up vs wt-42G		ARF2sm-42R up vs wt-42G	Chaperone protein dnaJ 20 (AHRD V1 ***- B6U349_MAIZE)%3B contains Interpro domain(s) I	at4g13830.2	| symbols: j20 | dnaj-like 20 | chr4:8011518-8012577 forward length=197	Solyc05g053760.2.1	SL2.40ch05	62934657	62937298	TES1265	119.032	63011556	TGS1606	119.373	62918955	\N	\N	\N	\N	heat shock protein binding	GO:0031072	#N/A	#N/A	Solyc05g053760.2	0	0	0		0.00407261	2.97712	2.97712	ARF2sm-42R up vs wt-42G	0	0	0
Solyc05g054670.2		ARF2sm-42R vs wt-42G diff			ARF2sm-42R up vs wt-42G		ARF2sm-42R up vs wt-42G	Os07g0175100 protein (Fragment) (AHRD V1 **-- Q0D898_ORYSJ)	at3g55350.1	| symbols: | pif / ping-pong family of plant transposases | chr3:20518518-20520690 forw	Solyc05g054670.2.1	SL2.40ch05	63680163	63685587	TES2039	125.278	63819313	TES0099	125.752	63667711	\N	\N	\N	\N	\N	\N	#N/A	#N/A	Solyc05g054670.2	0	0	0		0.00518675	2.51299	2.51299	ARF2sm-42R up vs wt-42G	0	0	0
Solyc05g055250.2		ARF2sm-42R vs wt-42G diff			ARF2sm-42R up vs wt-42G		ARF2sm-42R up vs wt-42G	Unknown Protein (AHRD V1)	at2g23930.2	| symbols: snrnp-g | probable small nuclear ribonucleoprotein g | chr2:10182496-1018302	Solyc05g055250.2.1	SL2.40ch05	64118836	64123310	TES1626	133.608	64426553	TG69	128.452	63918115	\N	\N	\N	\N	\N	\N	#N/A	#N/A	Solyc05g055250.2	0	0	0		0.00733352	2.36113	2.36113	ARF2sm-42R up vs wt-42G	0	0	0
Solyc05g055470.2		ARF2sm-42R vs wt-42G diff			ARF2sm-42R up vs wt-42G		ARF2sm-42R up vs wt-42G	NAC domain protein IPR003441 (AHRD V1 *-*- A9PB02_POPTR)%3B contains Interpro domain(s)	at5g04410.1	| symbols: nac2 anac078 | nac domain containing protein 2 | chr5:1243980-1246416 forwa	Solyc05g055470.2.1	SL2.40ch05	64249833	64254800	TES1626	133.608	64426553	TG69	128.452	63918115	\N	\N	\N	\N	sequence-specific DNA binding transcription factor activity	GO:0003700	#N/A	#N/A	Solyc05g055470.2	0	0	0		0.00278736	2.12661	2.12661	ARF2sm-42R up vs wt-42G	0	0	0
Solyc05g055630.2		ARF2sm-42R vs wt-42G diff			ARF2sm-42R up vs wt-42G		ARF2sm-42R up vs wt-42G	Palmitoyltransferase PFA4 (AHRD V1 ***- B6TA04_MAIZE)%3B contains Interpro domain(s) I	at5g04270.1	| symbols: | dhhc-type zinc finger family protein | chr5:1182896-1184718 reverse length	Solyc05g055630.2.1	SL2.40ch05	64350028	64353656	TES1626	133.608	64426553	TG69	128.452	63918115	\N	\N	\N	\N	protein-cysteine S-palmitoleyltransferase activity	GO:0019706	#N/A	#N/A	Solyc05g055630.2	0	0	0		9.2186e-05	2.05337	2.05337	ARF2sm-42R up vs wt-42G	0	0	0
Solyc05g055790.2		ARF2sm-42R vs wt-42G diff			ARF2sm-42R up vs wt-42G		ARF2sm-42R up vs wt-42G	Protein phosphatase 2c (AHRD V1 ***- Q4L0F8_MEDSA)%3B contains Interpro domain(s) IPR0	at3g02750.2	| symbols: | protein phosphatase 2c family protein | chr3:593601-595457 reverse length=	Solyc05g055790.2.1	SL2.40ch05	64438039	64441321	TES1546	134.076	64484290	TES1319	132.909	64431345	\N	\N	\N	\N	catalytic activity	GO:0003824	NA	Protein phosphatase 2c	Solyc05g055790.2	0	0	0		0.00179116	2.3115	2.3115	ARF2sm-42R up vs wt-42G	0	0	0
Solyc06g005670.2		ARF2sm-42R vs wt-42G diff			ARF2sm-42R up vs wt-42G		ARF2sm-42R up vs wt-42G	mRNA binding protein Pumilio 2 (AHRD V1 *-** C1GCQ9_PARBD)%3B contains Interpro domain(	at2g29190.2	| symbols: pum2 | pumilio 2 | chr2:12544260-12548071 reverse length=972	Solyc06g005670.2.1	SL2.40ch06	735456	743778	T687	0.839	763471	\NA	\NA	\NA	\N	\N	\N	\N	mRNA binding	GO:0003729	#N/A	#N/A	Solyc06g005670.2	0	0	0		0.000167245	2.10074	2.10074	ARF2sm-42R up vs wt-42G	0	0	0
Solyc06g007330.2		ARF2sm-42R vs wt-42G diff			ARF2sm-42R up vs wt-42G		ARF2sm-42R up vs wt-42G	Gamma-interferon-inducible lysosomal thiol reductase (AHRD V1 ***- B6U3P7_MAIZE)%3B con	at1g07080.1	| symbols: | thioredoxin superfamily protein | chr1:2170069-2171861 forward length=265	Solyc06g007330.2.1	SL2.40ch06	1353672	1356856	TGS2236	14.048	1495074	T270	1.617	1239118	\N	\N	\N	\N	protein binding disulfide oxidoreductase activity	GO:0005515 GO:0015036	#N/A	#N/A	Solyc06g007330.2	0	0	0		0.000211122	2.30265	2.30265	ARF2sm-42R up vs wt-42G	0	0	0
Solyc06g007350.2		ARF2sm-42R vs wt-42G diff			ARF2sm-42R up vs wt-42G		ARF2sm-42R up vs wt-42G	Phosphatase PTC7 homolog (AHRD V1 **** C1BT38_9MAXI)%3B contains Interpro domain(s) IP	at2g30170.1	| symbols: | protein phosphatase 2c family protein | chr2:12879802-12881474 reverse len	Solyc06g007350.2.1	SL2.40ch06	1383164	1387979	TGS2236	14.048	1495074	T270	1.617	1239118	\N	\N	\N	\N	protein serine/threonine phosphatase activity	GO:0004722	NA	Protein phosphatase 2C family protein	Solyc06g007350.2	0	0	0		0.000448091	2.30908	2.30908	ARF2sm-42R up vs wt-42G	0	0	0
Solyc06g007540.2		ARF2sm-42R vs wt-42G diff			ARF2sm-42R up vs wt-42G		ARF2sm-42R up vs wt-42G	Cytochrome b-c1 complex subunit 8 (AHRD V1 **** D6BQP2_9ROSI)%3B contains Interpro doma	at3g10860.1	| symbols: | cytochrome b-c1 complex subunit 8 protein | chr3:3399815-3400514 forward	Solyc06g007540.2.1	SL2.40ch06	1520884	1525347	T1636	4.23	1644342	TGS2236	14.048	1495074	\N	\N	\N	\N	ubiquinol-cytochrome-c reductase activity	GO:0008121	aerobic respiration -- electron donor II	ubiquinol-cytochrome-c reductase	Solyc06g007540.2	0	0	0		0.00644017	2.2856	2.2856	ARF2sm-42R up vs wt-42G	0	0	0
Solyc06g009370.2		ARF2sm-42R vs wt-42G diff			ARF2sm-42R up vs wt-42G		ARF2sm-42R up vs wt-42G	F7.9 (AHRD V1 ***- Q9XI11_ARATH)	at4g01870.1	| symbols: | tolb protein-related | chr4:808473-810431 reverse length=652	Solyc06g009370.2.1	SL2.40ch06	3293587	3294410	TGS0230	12.76	3804331	TES1873	9.989	3222328	\N	\N	\N	\N	\N	\N	#N/A	#N/A	Solyc06g009370.2	0	0	0		0.00193658	2.18566	2.18566	ARF2sm-42R up vs wt-42G	0	0	0
Solyc06g030470.2		ARF2sm-42R vs wt-42G diff			ARF2sm-42R up vs wt-42G		ARF2sm-42R up vs wt-42G	Auxin-regulated protein (AHRD V1 ***- Q945F5_SOLLC)%3B contains Interpro domain(s) IPR	at2g28150.1	| symbols: | domain of unknown function (duf966) | chr2:12000015-12002227 forward lengt	Solyc06g030470.2.1	SL2.40ch06	15436256	15438408	TGS0871	10.408	17313310	TGS0917	10.703	14963657	\N	\N	\N	\N	\N	\N	#N/A	#N/A	Solyc06g030470.2	0	0	0		0.00330699	5.70295	5.70295	ARF2sm-42R up vs wt-42G	0	0	0
Solyc06g036260.2		ARF2sm-42R vs wt-42G diff			ARF2sm-42R up vs wt-42G		ARF2sm-42R up vs wt-42G	Beta-carotene hydroxylase 1	at4g25700.1	| symbols: beta-ohase 1 b1 chy1 bch1 | beta-hydroxylase 1 | chr4:13094142-13095866 r	Solyc06g036260.2.1	SL2.40ch06	22432178	22434113	TGS0330	5.769	24707350	T1500	11.067	21129319	\N	\N	\N	\N	carotene beta-ring hydroxylase activity	GO:0010291	NA	beta-carotene hydroxylase	Solyc06g036260.2	0	0	0		0.00491193	3.02833	3.02833	ARF2sm-42R up vs wt-42G	0	0	0
Solyc06g051150.1		ARF2sm-42R vs wt-42G diff			ARF2sm-42R up vs wt-42G		ARF2sm-42R up vs wt-42G	Pentatricopeptide repeat-containing protein (AHRD V1 ***- D7KSS5_ARALY)%3B contains Int	at1g64310.1	| symbols: | tetratricopeptide repeat (tpr)-like superfamily protein | chr1:23866053-23	Solyc06g051150.1.1	SL2.40ch06	30780964	30781472	TGS3083	29.054	30813568	TGS2216	26.477	30619052	\N	\N	\N	\N	\N	\N	#N/A	#N/A	Solyc06g051150.1	0	0	0		0.00362392	2.88898	2.88898	ARF2sm-42R up vs wt-42G	0	0	0
Solyc06g051330.1		ARF2sm-42R vs wt-42G diff			ARF2sm-42R up vs wt-42G		ARF2sm-42R up vs wt-42G	Unknown Protein (AHRD V1)	none	none	Solyc06g051330.1.1	SL2.40ch06	31065873	31066058	TG590	28.001	31166234	TGS3083	29.054	30813568	\N	\N	\N	\N	\N	\N	#N/A	#N/A	Solyc06g051330.1	0	0	0		0.00339264	2.45094	2.45094	ARF2sm-42R up vs wt-42G	0	0	0
Solyc06g051750.2		ARF2sm-42R vs wt-42G diff			ARF2sm-42R up vs wt-42G		ARF2sm-42R up vs wt-42G	Cytochrome P450 Cytochrome P450	at5g05690.1	| symbols: cpd cyp90a cyp90 cbb3 dwf3 cyp90a1 | cytochrome p450 superfamily protei	Solyc06g051750.2.1	SL2.40ch06	31793440	31800469	T693	31.776	32073375	TG590	28.001	31166234	\N	\N	\N	\N	oxygen binding (+)-abscisic acid 8'-hydroxylase activity	GO:0019825 GO:0010295	phaseic acid biosynthesis	(+)-abscisic acid 8'-hydroxylase	Solyc06g051750.2	0	0	0		0.00860527	2.24212	2.24212	ARF2sm-42R up vs wt-42G	0	0	0
Solyc06g060230.2		ARF2sm-42R vs wt-42G diff			ARF2sm-42R up vs wt-42G		ARF2sm-42R up vs wt-42G	NAC domain protein IPR003441 (AHRD V1 ***- B9GU14_POPTR)%3B contains Interpro domain(s)	at1g01720.1	| symbols: ataf1 anac002 | nac (no apical meristem) domain transcriptional regulator s	Solyc06g060230.2.1	SL2.40ch06	34577474	34578909	TES0752	44.452	35052463	TES0550	50.089	34523293	\N	\N	\N	\N	sequence-specific DNA binding transcription factor activity	GO:0003700	#N/A	#N/A	Solyc06g060230.2	0	0	0		0.000274432	2.56777	2.56777	ARF2sm-42R up vs wt-42G	0	0	0
Solyc06g060680.1		ARF2sm-42R vs wt-42G diff			ARF2sm-42R up vs wt-42G		ARF2sm-42R up vs wt-42G	Receptor-like protein kinase 5 (AHRD V1 **** RLK5_ARATH)%3B contains Interpro domain(s)	at3g57700.1	| symbols: | protein kinase superfamily protein | chr3:21384917-21385939 forward length	Solyc06g060680.1.1	SL2.40ch06	35097286	35098164	TES0211	46.444	35108590	TES0752	44.452	35052463	\N	\N	\N	\N	protein binding kinase activity	GO:0005515 GO:0016301	#N/A	#N/A	Solyc06g060680.1	0	0	0		0.00976698	2.26913	2.26913	ARF2sm-42R up vs wt-42G	0	0	0
Solyc06g060790.1		ARF2sm-42R vs wt-42G diff			ARF2sm-42R up vs wt-42G		ARF2sm-42R up vs wt-42G	3-isopropylmalate dehydratase small subunit (AHRD V1 ***- Q9ZW85_ARATH)%3B contains Int	at2g43090.1	| symbols: | aconitase/3-isopropylmalate dehydratase protein | chr2:17918957-17919712 f	Solyc06g060790.1.1	SL2.40ch06	35203918	35204688	TGS3469	50.554	35229015	TES0298	46.727	35141145	\N	\N	\N	\N	hydro-lyase activity	GO:0016836	leucine biosynthesis	putative 3-isopropylmalate dehydrogenase small subunit	Solyc06g060790.1	0	0	0		0.00287498	2.07114	2.07114	ARF2sm-42R up vs wt-42G	0	0	0
Solyc06g063210.2		ARF2sm-42R vs wt-42G diff			ARF2sm-42R up vs wt-42G		ARF2sm-42R up vs wt-42G	Glutamate-gated kainate-type ion channel receptor subunit GluR5 (AHRD V1 **** B9HB97_PO	at2g29110.1	| symbols: atglr2.8 glr2.8 | glutamate receptor 2.8 | chr2:12506880-12510552 reverse l	Solyc06g063210.2.1	SL2.40ch06	36316008	36319510	TES1469	48.286	36427704	TEI0869	48.047	36208452	\N	\N	\N	\N	protein binding intracellular ligand-gated ion channel activity	GO:0005515 GO:0005217	#N/A	#N/A	Solyc06g063210.2	0	0	0		0.00653305	3.30283	3.30283	ARF2sm-42R up vs wt-42G	0	0	0
Solyc06g065580.2		ARF2sm-42R vs wt-42G diff			ARF2sm-42R up vs wt-42G		ARF2sm-42R up vs wt-42G	Uridine kinase (AHRD V1 ***- D7LLX3_ARALY)%3B contains Interpro domain(s) IPR000764 U	at5g40870.1	| symbols: atuk/uprt1 ukl1 uk/uprt1 | uridine kinase/uracil phosphoribosyltransferase	Solyc06g065580.2.1	SL2.40ch06	37357720	37366233	TES0292	45.716	37756511	TES0355	48.258	37267943	\N	\N	\N	\N	uracil phosphoribosyltransferase activity identical protein binding	GO:0004845 GO:0042802	NA	Uridine kinase	Solyc06g065580.2	0	0	0		0.00045314	2.02888	2.02888	ARF2sm-42R up vs wt-42G	0	0	0
[truncated: 3,505 more rows]
