# Supplementary material for: AUXIN RESPONSE FACTOR 2 Intersects Hormonal Signals in the Regulation of Tomato Fruit Ripening
Source: PLoS Genet. 2016 Mar 9;12(3):e1005903. doi: 10.1371/journal.pgen.1005903 (PMC4784954; doi:10.1371/journal.pgen.1005903)
Supplement: S9 Table — (XLSX) [file pgen.1005903.s019.xlsx]

## Sheet: S9 Dataset
S9 Table. PCA of untargeted flavonoid analysis in negative mode from UPLC-QTOF-MS analysis.
Variable	0.543162	0.136237	0.0982357	0.055784	0.0226452	0.0185712	0.0164274	0.0115041	0.00845624	0.00705405	0.0061658	0.00580957	0.00555053	0.00429024	0.00409669	0.00372467	0.00339025	0.00322533	0.003053	0.00294175	0.00287921	0.00263998	0.00246451	0.00237979	0.00230978	0.00216019	0.00212059	0.00205502	0.0019304	0.00178349	0.00169772	0.00163379	0.00156396	0.00153761	0.00142711	0.00135516	0.00129739	0.00124839	0.00120721	0.00115458	0.00104363	0.000959665	0.000825906
42_46G	0.201078	-0.164612	0.058283	-0.0572656	0.0693451	-0.11729	0.0329627	-0.0571943	0.0715432	-0.248185	0.13024	-0.220959	0.261907	0.150756	-0.0263639	-0.0917992	-0.0138378	0.144154	-0.0674183	-0.121841	0.0498155	0.223229	-0.0570168	-0.118858	0.198001	0.141783	-0.0786658	-0.0989939	0.0266089	-0.0998461	0.161049	-0.115497	0.242592	0.14512	-0.418982	-0.0824537	0.242654	0.0535585	0.0262615	0.273331	-0.00856405	0.144671	0.118882	IL_190212_21n01
42_46G	0.130475	-0.258115	0.00436766	-0.0425628	0.0974435	0.0115753	-0.134864	-0.0102224	0.0490727	-0.172274	0.30979	-0.0580772	0.0123183	0.150756	0.0619792	-0.232478	-0.0708478	0.250933	-0.137278	-0.207322	0.277	0.110775	0.0267726	0.0912147	-0.16886	0.112519	-0.202673	0.0417629	-0.0326275	0.202152	-0.0779552	0.242882	-0.198621	-0.0358264	0.0484704	-0.0329253	-0.236368	0.0032566	-0.130107	-0.353705	0.00981902	-0.105446	-0.0397692	IL_190212_32n01
42_46G	0.189431	0.022814	-0.02869	0.00452353	-0.301844	-0.158253	-0.184908	-0.0367629	0.0830127	-0.0313003	0.26353	0.0112755	0.191013	0.150756	0.11464	-0.0158032	0.213508	-0.0892351	0.255973	-0.0256991	-0.166598	-0.241118	-0.034453	-0.20462	-0.017598	0.124702	0.207951	-0.277072	0.028988	0.0144148	0.0801026	0.274665	-0.0430422	-0.0969692	0.216585	0.0109275	-0.0901201	0.139601	-0.185587	0.173705	0.00471841	0.119227	-0.111005	IL_190212_42n01
42_46G	0.150265	-0.12509	-0.0257023	-0.0377249	0.163266	0.292409	-0.224269	0.0183053	0.324365	-0.179819	0.0557734	-0.00373629	-0.277161	0.150756	-0.174252	-0.0789114	0.293631	-0.0449219	0.0322466	0.221851	-0.184547	-0.0274098	-0.0172112	0.0243244	-0.0263344	-0.325511	-0.242512	0.0125334	0.0834265	-0.12354	0.250415	0.0462609	0.0845085	-0.0162778	0.114575	-0.0837425	0.128382	-0.0227687	0.0957905	0.0296231	0.064226	-0.158744	-0.0945347	IL_190212_53n01
42_46G	0.119636	0.0576956	-0.135202	0.00697886	-0.226496	0.0577003	-0.280841	-0.0181322	-0.21833	0.0338623	0.13859	-0.1852	-0.156977	0.150756	-0.256942	0.072719	-0.0256583	0.0758686	0.13198	-0.00791324	0.0987056	0.128935	0.0498273	0.0123681	-0.0757029	-0.157785	0.331705	0.162279	-0.085377	-0.0137604	-0.260693	0.0197694	-0.103508	0.0877465	-0.244016	-0.117533	-0.0828663	-0.201572	0.0784433	0.286955	0.00175693	-0.281024	-0.0706006	IL_190212_61n01
42_46R	0.00494709	0.102943	-0.206734	-0.110975	0.103726	-0.0500287	-0.0193212	-0.163023	0.0910154	0.075064	0.0702194	-0.257862	0.146985	0.150756	0.108315	0.161996	-0.109277	-0.0336705	-0.0171802	0.0141201	-0.245268	0.132566	-0.00662288	0.108237	0.0256011	-0.110587	0.114836	-0.104393	0.287775	0.184102	0.20274	-0.12643	-0.00257172	-0.140591	-0.149956	0.357719	-0.211507	-0.111962	0.169862	-0.181561	-0.110416	-0.0129454	-0.277681	IL_190212_22n01
42_46R	-0.0431976	-0.00172924	-0.166188	-0.141118	0.174464	-0.279423	-0.0357466	-0.0946628	0.0513274	-0.079374	-0.231461	-0.268219	-0.0752479	0.150756	0.0641174	-0.108391	0.0557089	0.093835	-0.163338	0.0962846	-0.0634299	-0.0488048	0.115395	0.158011	0.0341757	-0.142567	0.162156	0.213141	-0.132514	0.0136084	-0.0959174	-0.0454727	-0.333938	-0.134691	0.0803479	-0.119899	0.270173	0.181046	-0.241064	0.0743153	-0.101486	0.269162	-0.157933	IL_190212_33n01
42_46R	-0.088812	0.152829	-0.199309	-0.126769	-0.111308	-0.305525	-0.126765	0.0500509	0.17474	0.115424	0.212795	0.192102	0.161173	0.150756	0.107147	-0.0319416	-0.126103	-0.108044	-0.117669	0.0343802	-0.0594178	-0.0879491	0.0148777	0.198145	0.0953056	0.00376392	-0.330667	-0.0128518	-0.047602	-0.0987881	-0.198744	-0.157232	0.0891954	0.0138856	0.0460308	-0.234245	0.0578409	-0.44839	0.0283153	0.0189738	0.147193	-0.0136807	-0.0816783	IL_190212_44n01
42_46R	0.0126037	-0.140551	-0.160771	-0.12006	0.234666	-0.0408619	-0.146965	-0.212786	0.12685	0.116261	-0.113749	-0.053063	-0.241641	0.150756	0.00112046	0.313915	-0.0720989	-0.147462	0.0887891	0.0643423	0.0971518	0.13389	-0.0500227	0.0232728	0.0188202	0.389769	-0.122783	0.10735	0.00824978	-0.264833	-0.196279	0.22086	0.155328	-0.0722585	0.0818895	0.117293	-0.234934	0.0892445	0.0676227	0.154664	-0.0315855	0.136482	0.140884	IL_190212_54n01
42_46R	0.0122507	0.117932	-0.255638	-0.0667378	0.0691142	0.187068	-0.0565578	0.0575223	0.0147317	0.265342	0.15926	-0.137922	-0.0978129	0.150756	0.0247439	-0.108686	-0.309974	-0.156705	0.0664477	-0.0793505	0.168947	0.11448	0.0112172	-0.20452	0.0946746	-0.088923	-0.054397	-0.175197	-0.0775138	0.102109	0.188963	-0.274257	-0.1576	0.139328	0.324042	-0.0803614	0.0429227	0.158317	-0.110841	0.112658	0.0293898	0.0413967	0.266826	IL_190212_62n01
42_72G	0.142327	0.0214501	-0.00261346	0.247361	-0.0035201	0.1236	-0.157512	0.0810283	0.011061	-0.0290235	-0.0913487	0.064783	0.255428	0.150756	0.0296814	0.107659	-0.113303	0.14586	-0.0189222	0.364609	-0.0220251	0.0181377	0.062533	0.0900173	0.029077	0.0892263	-0.00290831	0.215087	0.102811	0.344405	0.0778607	-0.160232	-0.0876999	0.0124203	0.0418242	0.0952395	-0.0965759	0.0655934	0.0481726	0.0787367	0.129133	-0.0332976	0.266399	IL_190212_23n01
42_72G	0.110858	-0.173655	0.0194364	0.125087	0.182671	-0.0288821	-0.180947	-0.078362	0.0787706	-0.0640757	-0.0938005	0.199512	0.184423	0.150756	0.0402675	0.0629835	0.326446	-0.0467298	0.188047	-0.0210037	0.152272	0.0113844	0.0185507	0.10387	-0.00110342	0.0631549	0.300695	-0.0404487	-0.141418	-0.134884	-0.107909	-0.363857	-0.0394667	0.140074	0.100949	0.197045	0.0980102	-0.198256	-0.11579	-0.236195	0.110317	0.0187866	0.128679	IL_190212_34n01
42_72G	0.190794	-0.00977391	0.0360463	0.230069	-0.0696066	0.0466372	-0.101893	0.195025	0.15123	-0.293292	-0.300097	-0.0319502	0.0675732	0.150756	0.0482884	0.0399212	-0.538117	-0.0769155	0.0542538	-0.257853	-0.120371	-0.223257	0.0269836	0.206546	-0.00564314	-0.17365	0.0291402	-0.0869174	-0.0833277	-0.173415	-0.0830062	0.132639	0.0806223	-0.0663231	0.0289607	0.051639	0.0175273	0.0457277	0.0128715	-0.0076822	-0.0941042	-0.0571261	0.081796	IL_190212_45n01
42_72G	0.131659	0.0804073	-0.0778921	0.207524	-0.067147	0.0689418	-0.184289	0.0417888	-0.296912	0.104604	-0.240855	-0.118049	-0.0106679	0.150756	0.0686448	-0.0252934	0.0863082	0.327921	0.0746833	0.0746235	0.123213	-0.264235	-0.0331069	-0.254963	-0.00847578	0.10096	-0.310062	0.0269474	0.126383	-0.0267681	-0.00570206	-0.0429284	0.00645401	-0.111075	0.0190412	-0.104664	0.0374861	-0.144288	0.213614	-0.0685583	-0.0572468	0.308604	-0.137996	IL_190212_56n01
42_72G	-0.00827348	-0.263293	-0.0740269	0.14561	0.266349	0.063402	-0.143274	0.0979687	-0.058239	0.211204	-0.11113	0.393818	-0.0512329	0.150756	0.266889	0.0705022	0.0272439	-0.107491	-0.357327	-0.150677	-0.0826884	0.00760169	-0.000292731	-0.176825	0.111532	-0.0680744	0.188755	-0.0806559	0.0429809	0.210153	0.0305956	0.165184	-0.000267265	0.122008	-0.151069	-0.192139	-0.0168102	-0.0441788	0.0143142	0.167868	-0.136246	-0.0268969	-0.151479	IL_190212_63n01
42_72R	-0.163134	0.228622	0.138136	0.131833	0.188477	-0.0491663	-0.00523284	0.200363	0.118998	0.148312	0.187906	-0.0540706	0.0607899	0.150756	-0.102021	0.035974	0.0348612	0.189645	0.0437492	0.00765108	-0.264265	0.104243	0.0395166	-0.00313727	0.11916	0.268011	0.136197	0.192891	-0.226194	0.0986678	0.0945367	0.27103	0.0585638	-0.224534	0.10692	-0.0760985	0.249271	-0.0873056	0.107432	-0.0609369	-0.111296	-0.144526	0.190915	IL_190212_24n01
42_72R	-0.110048	0.180471	-0.0566197	0.152355	0.132824	-0.174005	0.0174576	0.0366051	0.0116897	-0.0819475	0.00238621	-0.0470055	0.0930405	0.150756	-0.199699	-0.102216	0.13003	-0.0514	-0.0240874	-0.0990848	0.158245	-0.0538715	0.0159985	0.0588477	0.134791	-0.0696708	0.130188	0.0646318	-0.0128981	0.081176	-0.0931259	-0.106351	0.386608	0.147938	0.18143	-0.238752	-0.285325	0.414065	0.276059	-0.108871	0.0829755	-0.0175709	-0.215207	IL_190212_35n01
42_72R	-0.130995	0.198036	-0.00451261	0.182368	0.205476	-0.0648156	0.117552	0.152548	-0.0541331	-0.0714058	0.15414	0.075705	0.0716043	0.150756	-0.129627	-0.0435124	0.0166932	-0.0965785	0.154837	-0.0638155	0.0314762	0.069881	-0.018786	0.0247759	-0.182067	-0.124192	0.00986536	0.168599	0.454726	-0.233868	0.049607	0.17004	-0.17663	0.321226	-0.000613427	-0.0122755	-0.0379926	-0.150818	-0.109322	-0.00909055	-0.267661	0.25552	0.108459	IL_190212_46n01
42_72R	-0.0184488	0.157782	-0.172339	0.185364	0.121081	-0.060616	-0.117541	-0.0221382	-0.331263	0.140605	-0.0643064	0.0867292	0.0265346	0.150756	-0.203559	0.00972193	0.00553844	-0.0369569	0.0759679	0.0379971	0.0239128	0.127658	-0.0868629	0.0302494	0.0539901	-0.00953255	-0.203915	-0.288573	-0.177667	-0.151057	0.0779749	0.0543021	0.0660188	-0.110654	-0.20622	0.137471	0.170245	0.166624	-0.315445	-0.24576	-0.0960149	-0.23839	-0.131181	IL_190212_57n01
42_72R	-0.114434	0.162575	-0.0822918	0.187686	0.259109	0.135781	0.187462	0.0268685	-0.0452486	-0.150141	0.0823676	0.0627072	-0.0521669	0.150756	-0.0428668	-0.236333	0.0394977	-0.113022	-0.0604232	-0.103641	-0.0701527	-0.0726607	-0.111835	-0.0351426	-0.212363	0.0497742	-0.0127151	-0.0716581	-0.145088	0.02553	-0.102514	-0.0196558	-0.134964	-0.275946	-0.179983	0.214466	-0.106573	-0.0498829	0.0592228	0.291459	0.487839	0.16025	-0.0310293	IL_190212_64n01
42_M82G	0.300456	0.154031	0.191311	-0.128294	0.115878	0.116939	0.228898	0.0748978	-0.0428221	0.130024	0.0566109	-0.045438	0.0177744	0.150756	0.269407	0.124997	0.0884918	0.159442	0.0710468	0.0798796	-0.222511	0.236898	-0.049858	-0.0952362	-0.04441	-0.337786	-0.0463323	-0.128482	-0.0673004	-0.01012	-0.475408	0.0208951	0.130916	0.00726386	0.0145947	-0.0880936	-0.0736698	0.0737334	-0.0615762	-0.123335	0.0340933	0.112094	0.115615	IL_190212_20n01
42_M82G	0.289612	0.145792	0.183431	-0.105243	0.0526821	-0.0171648	0.184249	0.0208776	-0.0999904	0.21436	-0.0417863	-0.0228171	-0.00833959	0.150756	0.0499768	-0.206513	0.0109244	0.0635533	-0.309401	0.25732	0.268087	-0.103339	0.0910169	0.315782	0.0237637	0.0958933	0.205347	-0.248509	0.106832	-0.292042	0.171354	0.137439	-0.041087	-0.00449682	0.0988979	0.0345337	-0.0537837	-0.0591065	0.116867	0.1174	0.0281158	-0.149573	0.0223869	IL_190212_30n01
42_M82G	0.262352	0.0614567	0.129947	-0.0489184	-0.0724303	-0.115119	0.10255	-0.0244714	0.0502282	-0.0399344	0.0884857	0.13597	0.0306738	0.150756	-0.0514668	0.0503415	-0.209681	-0.428917	-0.0600795	0.323897	0.228011	-0.0217374	-0.021372	-0.339323	-0.0408309	-0.0611294	0.0420678	0.352338	-0.101536	0.0429439	0.0649386	0.100091	0.0210562	-0.0831277	-0.167511	0.0222858	0.11724	0.0442885	-0.0212316	-0.229846	0.0723439	0.0731979	-0.142107	IL_190212_41n01
42_M82G	0.270076	0.139299	0.179726	-0.0958685	0.0570161	0.0738993	0.199835	-0.0136559	-0.0333334	0.0718183	-0.0284201	-0.0618077	-0.118345	0.150756	-0.0310128	0.27804	0.204638	-0.226265	0.180855	-0.407929	0.148727	-0.204935	-0.0346346	0.284853	0.0820245	0.102218	-0.181379	0.0841817	-0.00218758	0.343028	0.0799864	-0.0641042	-0.0978053	-0.0133014	-0.0467631	-0.0689301	0.132493	-0.0597255	-0.00227821	0.0808229	-0.0719269	-0.0377217	-0.067453	IL_190212_52n01
42_M82G	0.263966	0.0811369	0.160115	-0.0701329	-0.104331	-0.315944	0.0338299	-0.0755583	-0.0463938	-0.0438128	-0.137236	0.321336	-0.322057	0.150756	-0.23791	-0.189574	-0.0767136	0.155611	-0.0719144	-0.164196	-0.34574	0.170696	-0.000822373	-0.151647	-0.0248056	0.142657	-0.0432513	0.0850531	0.014497	0.0088112	0.0955573	-0.273345	-0.0519054	0.0419681	0.131494	0.111848	-0.192067	-0.0148964	-0.031458	0.0364329	-0.0883846	-0.0283549	-0.00534773	IL_190212_60n01
53_46R	-0.126914	-0.0435935	0.11373	-0.237386	-0.000657242	0.0591779	-0.0121313	-0.196298	-0.0887483	0.0648657	-0.311844	-0.0676647	0.41581	0.150756	-0.217068	-0.132793	0.0545047	-0.0492128	-0.104622	-0.176938	0.0809241	0.0693613	-0.0858491	-0.212198	0.0410461	-0.227182	-0.0938453	0.1148	0.00547295	0.0832999	-0.0590896	0.22656	0.0955138	-0.0250795	0.310034	0.222465	0.0314444	-0.21727	-0.0278754	0.150498	0.0259885	-0.125789	0.0388964	IL_190212_27n01
53_46R	-0.166951	-0.0177331	0.124498	-0.24715	0.0310475	0.0511897	-0.043783	-0.0458323	-0.13975	-0.157041	-0.15259	0.0883343	0.175532	0.150756	0.123927	0.00327251	-0.0298841	-0.109828	0.205172	0.0677965	-0.0160269	0.163558	-0.156459	0.0398146	-0.318623	0.0276401	0.0394832	-0.110657	-0.274714	-0.0764371	0.264572	-0.0947091	-0.160838	-0.138606	-0.0374446	-0.390544	-0.173463	-0.0290383	0.280699	-0.034649	-0.186761	0.0213605	0.0313663	IL_190212_38n01
53_46R	-0.125658	0.119485	-0.0759321	-0.182837	-0.00825805	-0.0724622	-0.00464234	0.116407	0.0764749	-0.111954	-0.103468	-0.0413718	0.057175	0.150756	0.103992	-0.126514	0.221887	-0.12955	-0.0748843	0.139586	-0.0534606	-0.303705	0.0306993	-0.139233	-0.0472142	0.104152	-0.185617	-0.0102795	0.0915507	0.0626286	-0.22584	-0.0857728	-0.116483	0.080006	-0.263184	0.0823575	-0.127208	0.207492	-0.0452996	0.0562448	-0.258844	-0.38416	0.293367	IL_190212_49n01
53_46R	-0.16108	0.0966527	0.100111	-0.203463	-0.166098	0.0919175	-0.118126	0.153557	0.0340226	0.0587559	-0.255753	0.0493052	-0.076848	0.150756	0.152903	-0.204717	1.45635e-05	0.00911298	0.276043	0.0260133	-0.0666655	0.161695	0.0207779	0.142239	0.346493	0.0754459	-0.0305629	0.0651112	-0.00801064	0.0281017	0.0898573	0.244454	-0.124949	0.327694	-0.205346	0.0614524	-0.072507	0.0692771	-0.0429601	-0.103917	0.351254	0.102708	-0.116333	IL_190212_59n01
53_46R	-0.196759	0.107411	0.108903	-0.19093	-0.151706	0.00092282	-0.118154	0.388224	0.228973	-0.0510165	-0.0999777	0.166229	-0.0695537	0.150756	-0.0851682	0.208691	0.00948223	0.149754	-0.055726	-0.0269239	0.320668	0.226361	0.0940376	-0.0329565	-0.263217	0.034375	0.0526901	-0.194463	0.234183	0.101589	-0.0699163	-0.100646	0.113007	-0.221089	0.0105364	0.0933951	0.184814	0.104061	-0.085735	0.10411	0.0102307	0.0694121	-0.148534	IL_190212_66n01
53_46Y	-0.110974	-0.33325	0.0744653	-0.147404	0.110248	-0.105733	0.183405	0.138624	-0.0469945	0.215044	0.104275	0.0578494	0.148466	0.150756	-0.261796	0.314113	-0.12718	0.282462	0.0946687	0.103721	-0.087268	-0.325671	0.00514743	0.0543487	-0.091634	-0.136503	-0.0943097	0.0521558	-0.123954	-0.0709907	0.155014	-0.0426708	-0.0290136	0.120477	-0.0662997	-0.00740748	-0.191187	0.115406	-0.195161	0.122982	0.155862	0.00403913	-0.0857213	IL_190212_26n01
53_46Y	-0.0640316	-0.311058	-0.0107828	-0.0695646	-0.148809	0.192369	0.0992473	0.101188	-0.272386	-0.0647306	0.260998	0.236896	0.0526316	0.150756	-0.0798008	-0.168819	-0.0170089	-0.110967	0.087409	0.108232	-0.0430102	0.064009	0.030092	0.234233	0.318075	-0.0127662	-0.061388	0.0522526	0.0374049	-0.008803	-0.222422	-0.0846148	-0.0492903	-0.210776	0.104699	0.188612	0.101359	0.15796	0.196753	0.0949235	-0.287764	0.150074	-0.0735038	IL_190212_37n01
53_46Y	-0.0293229	-0.313284	-0.0478056	-0.0819753	0.0380445	-0.190943	0.115103	0.0912048	-0.0746478	0.0985267	-0.043455	-0.149925	-0.11606	0.150756	-0.110729	-0.0449	-0.109042	-0.0777359	0.103578	-0.0377969	-0.135496	-0.107119	-0.0447192	-0.144228	-0.152478	0.114318	0.120763	-0.192975	0.219687	0.0528343	-0.158725	0.0334223	-0.11869	0.122916	0.043982	-0.00906505	0.359175	0.0134446	0.379632	-0.261508	0.235678	-0.125123	0.0713078	IL_190212_48n01
53_46Y	-0.0278861	-0.189989	-0.106733	-0.0510969	-0.138444	0.0744064	0.0479216	0.223874	-0.0689574	0.23491	-0.0294524	-0.179767	-0.135551	0.150756	0.160345	-0.317946	0.0688254	-0.0965124	0.0383452	-0.0684908	-0.0530541	-0.0871486	-0.017164	0.0986579	-0.262305	0.0288807	0.140313	0.249004	-0.053266	0.0220125	0.147718	-0.103657	0.500344	-0.0844694	-0.0785241	0.0690545	-0.0597803	-0.120879	-0.213488	-0.0782642	-0.0845819	0.0880974	0.106013	IL_190212_58n01
53_46Y	-0.0247104	-0.00838209	-0.121346	0.0220593	-0.312695	0.164255	0.0847547	0.264353	0.0531115	-0.0284104	0.0134256	-0.154949	0.0261809	0.150756	-0.10735	0.277737	0.226685	-0.054422	-0.441648	-0.188062	-0.0596112	0.0409417	-0.0998025	-0.117447	0.163487	0.0283538	0.0297923	0.052409	-0.168616	-0.291278	0.0847499	-0.0468205	-0.225319	0.0118232	0.00712193	0.0530784	-0.144074	-0.00829001	0.084646	-0.227802	0.0280496	0.113461	0.0812209	IL_190212_65n01
53_72Y	-0.0852318	-0.0903874	-0.0030637	0.272613	-0.194922	-0.0106352	0.235577	-0.279388	0.478852	0.342499	-0.0840585	0.0947292	-0.00480888	0.150756	-0.0673883	-0.165553	0.0411084	0.120699	0.178766	-0.065697	0.167921	0.0198393	0.205319	-0.0643981	0.024229	-0.167414	-0.0308469	-0.0649232	-0.0859477	-0.0337028	-0.0234245	0.013864	-0.128165	-0.130476	-0.220766	-0.0137507	-0.0586133	0.0191661	0.150555	-0.020438	-0.156521	0.034482	0.0631652	IL_190212_28n01
53_72Y	-0.0913532	-0.149559	-0.0096723	0.288826	-0.194161	-0.115137	0.242532	-0.0541632	0.0485154	-0.0534958	-0.102569	-0.0848027	-0.0785898	0.150756	0.104359	0.0415532	0.0175299	-0.000271398	0.0163756	0.143213	0.0490129	0.177942	-0.6141	0.102253	0.0976105	0.0120691	-0.000244521	0.0230056	0.218127	0.0524254	-0.0138964	-0.0242807	-0.037286	-0.111164	0.11961	-0.201328	-0.017865	-0.0260867	-0.216956	0.0770481	0.0761866	-0.210576	-0.019197	IL_190212_39n01
53_72Y	-0.046924	-0.101298	-0.0250363	0.270249	-0.169258	-0.0243797	0.218339	-0.0434779	-0.126105	-0.0990418	-0.0547915	-0.14341	0.0461274	0.150756	0.154808	0.118737	0.0891323	-0.165642	-0.048875	0.0853674	-0.119904	0.266828	0.507079	0.0343422	-0.260993	0.123341	-0.227931	-0.027896	-0.119154	0.0211512	0.0356397	0.0467102	0.0293758	0.237529	0.176562	0.0171329	0.0628804	0.00331463	-0.0198211	0.136836	0.0398813	-0.109274	-0.185641	IL_190212_50n01
53_72R	-0.180079	0.113441	0.358475	0.0858252	-0.118856	0.188199	-0.251157	-0.317457	0.068623	0.16946	0.175998	-0.0399706	-0.0179426	0.150756	0.0778281	-0.00832727	-0.102306	0.0266709	-0.224094	-0.0222763	-0.0950778	-0.124003	-0.286484	0.115791	-0.254664	0.073958	-0.0270594	0.0544499	-0.0760568	-0.0474112	-0.0954879	-0.0998541	0.00914338	0.29847	-0.00932291	0.146414	0.204692	0.207154	0.0535197	0.011982	-0.0794061	0.0756168	-0.12944	IL_190212_29n01
53_72R	-0.201647	-0.0490153	0.371759	0.0397762	0.00513951	0.1006	-0.148105	-0.223192	-0.159077	-0.00157559	0.0572082	-0.098351	-0.0406169	0.150756	-0.0147672	0.0464905	-0.0520983	-0.144898	-0.0610362	-0.0968557	-0.10017	-0.0602485	0.341815	-0.0618601	0.170253	0.00429829	0.0417843	-0.000951361	0.33754	-0.141583	-0.00868612	-0.14775	0.00634751	-0.315937	-0.068961	-0.275406	-0.0929899	0.00905281	-0.223591	-0.121176	0.199507	-0.0352808	0.13247	IL_190212_40n01
53_72R	-0.266004	-0.0327873	0.285654	0.0854034	0.0723347	-0.223638	-0.00599105	0.0561781	-0.0629013	-0.233794	0.108208	-0.171661	-0.34395	0.150756	0.145104	0.0736274	-0.0350543	0.0296043	0.0349306	0.151772	0.188764	-0.12196	0.00550173	-0.149996	0.236485	-0.171054	0.00551374	-0.198345	-0.231023	0.126609	0.0517705	-0.0136379	0.0661627	0.0904413	0.0602551	0.242065	-0.111355	-0.274795	0.040091	0.0289681	-0.141197	0.0424192	0.035977	IL_190212_51n01
53_M82R	-0.0516494	0.0725266	-0.177602	-0.104222	-0.067521	0.32027	0.20155	-0.223929	0.059695	-0.201881	-0.0859901	0.0628483	-0.0576454	0.150756	-0.341246	0.0108362	-0.0864705	0.0433932	-0.0999104	0.197181	-0.0866751	-0.130269	0.033619	0.0400826	0.0218391	0.210506	0.151211	-0.265054	-0.0349141	0.258556	-0.107153	0.088399	0.147837	0.159777	-0.024952	-0.187035	-0.00401245	-0.205427	-0.197084	-0.150713	-0.108035	0.204819	0.0287844	IL_190212_25n01
53_M82R	-0.0743391	0.110051	-0.167829	-0.124187	0.0742193	0.260477	0.259606	-0.109925	0.0227897	-0.183102	0.0667399	0.133181	-0.0143067	0.150756	0.312187	0.0419325	-0.126357	0.280738	0.144763	-0.106929	0.0732173	-0.130191	0.0488427	-0.235503	0.0962764	0.135615	0.133523	0.228012	0.0433602	-0.251386	0.0320246	-0.109592	0.0361095	0.0213391	0.10101	0.034477	0.111542	-0.00846131	-0.0331143	-0.0011114	-0.00636913	-0.307715	-0.25999	IL_190212_36n01
53_M82R	-0.0739301	0.0923184	-0.244063	-0.0796241	-0.196551	-0.161715	0.010186	-0.286827	-0.21346	-0.140315	0.0791916	0.264738	-0.135638	0.150756	0.150363	0.175261	0.0883227	0.154095	-0.0830927	-0.0995444	0.0573613	-0.0412789	0.0318553	0.149817	-0.0773898	-0.273058	0.0100903	0.0613018	0.0383026	0.064205	0.194868	0.193902	0.133437	-0.0257819	-0.0299477	0.0556776	0.151494	0.142014	0.125039	-0.0554163	0.159852	0.0573354	0.409954	IL_190212_47n01
